# Supplementary material
Source: PubMed Central journal article supplement (PMC8460879)
Supplement: mmc1.pdf [file mmc1.pdf]

# THE LANCET

## Digital Health

### Supplementary appendix

This appendix formed part of the original submission and has been peer reviewed. We post it as supplied by the authors.

Supplement to: Li Y, Wang X, Campbell H, et al. The association of community mobility with the time-varying reproduction number ( $R$ ) of SARS-CoV-2: a modelling study across 330 local UK authorities. *Lancet Digit Health* 2021; published online Aug 31. [https://doi.org/10.1016/S2589-7500\(21\)00144-8](https://doi.org/10.1016/S2589-7500(21)00144-8).

## Table of Contents

|                                                                                                                                                                          |     |
|--------------------------------------------------------------------------------------------------------------------------------------------------------------------------|-----|
| Text S1. Details of sampling R based on credible intervals.....                                                                                                          | 2   |
| Table S1. Summary of publications on the association between community mobility and transmission of SARS-CoV-2 .....                                                     | 3   |
| Table S2. Summary of datasets included in the analysis .....                                                                                                             | 6   |
| Table S3. Summary of secondary analyses in comparison with the main analysis .....                                                                                       | 7   |
| Table S4. Association between six Google mobility metrics and R by individual local authority, as R ratio (95% CI).....                                                  | 8   |
| Table S5. Meta-regression findings showing the modifiers of the association between six Google community mobility metrics and R, as the ratio of R ratios (95% CI) ..... | 16  |
| Figure S1. Change over time (by week) in the mobility metrics and R on the local-authority level .....                                                                   | 17  |
| Figure S2. Comparisons of findings from the main and sensitivity analyses .....                                                                                          | 144 |
| Figure S3. Change over time in the association between visits to retail and recreation places and R by region                                                            | 145 |
| Figure S4. Change over time in the association between visits to workplaces and R by region .....                                                                        | 146 |
| Figure S5. Change over time in the association between time length spent at residential areas and R by region .....                                                      | 147 |
| STROBE checklist.....                                                                                                                                                    | 148 |
| References .....                                                                                                                                                         | 150 |

### Text S1. Details of sampling R based on credible intervals

Model estimates of R were reported originally as 30%, 60% and 90% credible intervals (CrI). To incorporate the uncertainty of R, we assumed that within each non-overlapping CrI, R followed a simple continuous uniform distribution. The joint probability density function is as follows:

$$f(R) = \begin{cases} \frac{1}{6} \times \frac{1}{CrI_{60.lower} - CrI_{90.lower}} & \text{for } R \in [CrI_{90.lower}, CrI_{60.lower}] \\ \frac{1}{6} \times \frac{1}{CrI_{30.lower} - CrI_{60.lower}} & \text{for } R \in [CrI_{60.lower}, CrI_{30.lower}] \\ \frac{2}{6} \times \frac{1}{CrI_{30.upper} - CrI_{30.lower}} & \text{for } R \in [CrI_{30.lower}, CrI_{30.upper}] \\ \frac{1}{6} \times \frac{1}{CrI_{60.upper} - CrI_{30.upper}} & \text{for } R \in [CrI_{30.upper}, CrI_{60.upper}] \\ \frac{1}{6} \times \frac{1}{CrI_{90.upper} - CrI_{60.upper}} & \text{for } R \in [CrI_{60.upper}, CrI_{90.upper}] \\ 0 & \text{otherwise} \end{cases}$$

Based on above, we used a two-step sampling method to generate 100 samples of R. As the first step, we randomly selected one interval out of the five intervals (with the interval between 30% lower CrI and 30% upper CrI having twice the probability of being selected than the rest), practically done by a simple random sampling among the numbers 1 to 6 (with the numbers 3 and 4 both representing the interval between 30% lower CrI and 30% upper CrI). Then we sampled 100 times from the selected interval based on uniform distribution. An example of the sampled R (Aberdeen city) is shown below,

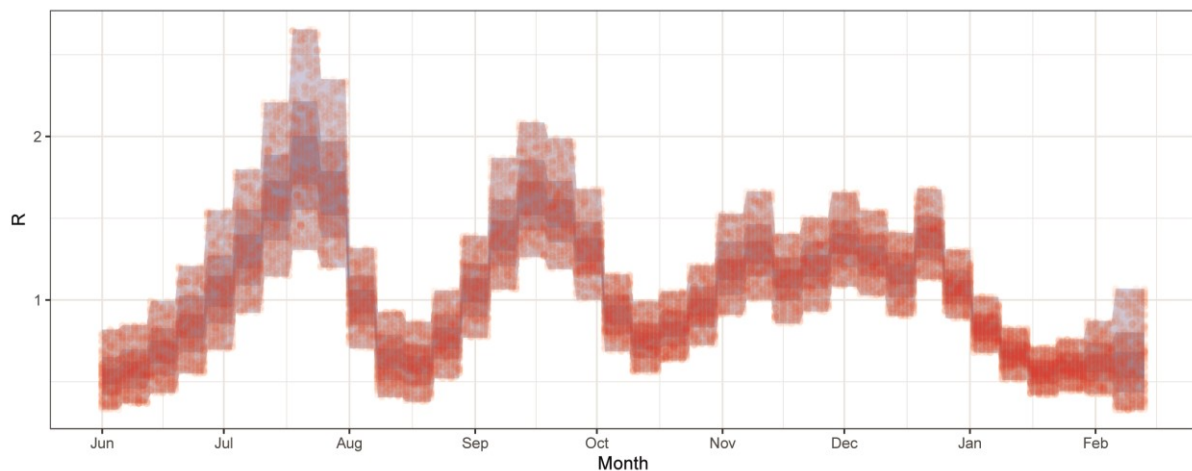

where shaded areas denote 30%, 60% and 90% CrIs and red points denote sampled R.

**Table S1. Summary of publications on the association between community mobility and transmission of SARS-CoV-2**

| Index | Reference                            | Location and country                    | Mobility metric(s)                                                                                         | Main outcome measure                      | Main findings on the association between mobility and transmission                                                                                                                                                                                                                                                                                                                                                         |
|-------|--------------------------------------|-----------------------------------------|------------------------------------------------------------------------------------------------------------|-------------------------------------------|----------------------------------------------------------------------------------------------------------------------------------------------------------------------------------------------------------------------------------------------------------------------------------------------------------------------------------------------------------------------------------------------------------------------------|
| 1     | Badr et al. 2020 <sup>1</sup>        | Multiple counties, USA                  | Mobility ratio relative to a pre-COVID-19 baseline, derived from aggregated and anonymised cell phone data | Growth rate of COVID-19 cases             | <ul style="list-style-type: none"> <li>Mobility patterns are strongly correlated with decreased COVID-19 case growth rates for the most affected counties in the USA, with Pearson correlation coefficients above 0.7 for 20 of the 25 counties evaluated.</li> <li>The effect of changes in mobility patterns on COVID-19 cases are not likely to be perceptible for 9–12 days, and potentially up to 3 weeks.</li> </ul> |
| 2     | Brown et al. 2021 <sup>2</sup>       | Multiple provinces, Canada              | Out-of-home mobility, derived from Google community mobility reports                                       | Growth rate of COVID-19 cases             | <ul style="list-style-type: none"> <li><b>Each 10% increase in mobility is associated with 25% increase in growth rate of COVID-19 cases.</b></li> </ul>                                                                                                                                                                                                                                                                   |
| 3     | Carlitz et al. 2021 <sup>3</sup>     | Multiple provinces, South Africa        | Multiple Google community mobility metrics                                                                 | Growth rate of COVID-19 cases             | <ul style="list-style-type: none"> <li>Mobility reductions are significantly and negatively associated with COVID-19 growth rates two weeks later.</li> </ul>                                                                                                                                                                                                                                                              |
| 4     | Cazelles et al. 2021 <sup>4</sup>    | Multiple regions in France, and Ireland | Multiple Google community mobility metrics                                                                 | Reproduction number                       | <ul style="list-style-type: none"> <li>High positive correlation between trends in the transmission of SARS-CoV-2 and mobility.</li> </ul>                                                                                                                                                                                                                                                                                 |
| 5     | Chen et al. 2021 <sup>5</sup>        | Wuhan, China                            | Intra-city mobility and inter-city mobility                                                                | COVID-19 cases                            | <ul style="list-style-type: none"> <li>Intra-city mobility is weakly negatively correlated with COVID-19 cases whereas inter-city mobility is positively correlated with COVID-19 cases</li> </ul>                                                                                                                                                                                                                         |
| 6     | Da Silva et al. 2021 <sup>6</sup>    | Multiple cities, Brazil                 | Multiple Google community mobility metrics                                                                 | COVID-19 cases                            | <ul style="list-style-type: none"> <li>Inconsistent correlation results between mobility metrics and COVID-19 cases are observed among different cities.</li> </ul>                                                                                                                                                                                                                                                        |
| 7     | Díaz-Castro et al. 2021 <sup>7</sup> | Multiple states, Mexico                 | Multiple Google community mobility metrics                                                                 | COVID-19 cases doubling time              | <ul style="list-style-type: none"> <li>The mobility in parks (<math>p &lt; 0.01</math>) and the residential mobility (<math>p &lt; 0.01</math>) are associated with doubling time of COVID-19 cases.</li> </ul>                                                                                                                                                                                                            |
| 8     | Fan et al. 2021 <sup>8</sup>         | Multiple counties, USA                  | Facebook co-location maps                                                                                  | Growth rate of COVID-19 cases             | <ul style="list-style-type: none"> <li>The mitigation effects of co-location reduction appear in the growth of weekly new confirmed cases with one week of delay.</li> </ul>                                                                                                                                                                                                                                               |
| 9     | Gao et al. 2020 <sup>9</sup>         | Multiple states, USA                    | Daily travel distance and home dwell time derived from anonymous mobile phone location data                | Growth rate of COVID-19 cases             | <ul style="list-style-type: none"> <li>The correlation between the COVID-19 increase rate and travel distance decrease rate is <math>-0.586</math> and that between COVID-19 increase rate and home dwell time increase rate was <math>0.526</math>.</li> </ul>                                                                                                                                                            |
| 10    | Gatalo et al. 2020 <sup>10</sup>     | Multiple counties, USA                  | Social distancing metrics created from phone mobility data provided by mobile phone service provider       | Growth rate of COVID-19 cases             | <ul style="list-style-type: none"> <li>Strong correlation results are observed between decreased mobility and reduced COVID-19 case growth between March 27 and April 20, 2020, but only weak correlation results are observed in later months, between April and July, 2020.</li> </ul>                                                                                                                                   |
| 11    | Glaeser et al. 2020 <sup>11</sup>    | Multiple cities, USA                    | Weekly number of visitors to a point of interest based on cell phone location data                         | Total / new cases per capita per zip code | <ul style="list-style-type: none"> <li><b>Total cases per capita decrease by 20% for every ten percentage point fall in mobility.</b></li> </ul>                                                                                                                                                                                                                                                                           |
| 12    | Iacus et al. 2020 <sup>12</sup>      | Multiple regions, France and Italy      | Connectivity metric derived from mobile network operators                                                  | Excess COVID-19 deaths                    | <ul style="list-style-type: none"> <li>Mobility alone can explain up to 92% of the initial spread.</li> <li>Internal mobility is more important than mobility across provinces in explaining the spread.</li> <li>The time lag between changes in mobility and excess COVID-19 deaths is 14–20 days.</li> </ul>                                                                                                            |
| 13    | Jamshidi et al. 2020 <sup>13</sup>   | Multiple counties, USA                  | Mobility index and home index derived from anonymous cell phone location data                              | Growth rate of COVID-19 cases             | <ul style="list-style-type: none"> <li>The mobility index (with the relative importance of 34.32%) is the highest contributing factor to the COVID-19 pandemic growth, followed by homestay (26.14%), population (23.86%), and urban density (13.03%).</li> </ul>                                                                                                                                                          |
| 14    | Kajitani et al. 2021 <sup>14</sup>   | Multiple prefectures, Japan             | Mobility metric derived from mobile phone service provider                                                 | Reproduction number                       | <ul style="list-style-type: none"> <li><b>A 20%–35% reduction in weekly mobility is required to reduce R down to below 1.</b></li> </ul>                                                                                                                                                                                                                                                                                   |



| Index | Reference                           | Location and country                                     | Mobility metric(s)                                                                                                       | Main outcome measure                                                   | Main findings on the association between mobility and transmission                                                                                                                                                                                                                                                                                                                                                                                                                                             |
|-------|-------------------------------------|----------------------------------------------------------|--------------------------------------------------------------------------------------------------------------------------|------------------------------------------------------------------------|----------------------------------------------------------------------------------------------------------------------------------------------------------------------------------------------------------------------------------------------------------------------------------------------------------------------------------------------------------------------------------------------------------------------------------------------------------------------------------------------------------------|
| 15    | Kissler et al. 2020 <sup>15</sup>   | New York City, USA                                       | The percent change in commuting-style movements between boroughs using data provided by Facebook's Data for Good program | Prevalence of COVID-19 among pregnant women                            | <ul style="list-style-type: none"> <li>Prevalence of COVID-19 is lowest in boroughs with the greatest reductions in morning movements out of and evening movements into the borough (Pearson R = -0.88 [-0.52, -0.99])</li> </ul>                                                                                                                                                                                                                                                                              |
| 16    | Kraemer et al. 2020 <sup>16</sup>   | Multiple provinces, China                                | Real-time travel history data between Wuhan and other provinces from internet services company, Baidu                    | COVID-19 cases                                                         | <ul style="list-style-type: none"> <li>The spatial distribution of COVID-19 cases in China is explained well by mobility data early on but this correlation drops after the implementation of control measures.</li> </ul>                                                                                                                                                                                                                                                                                     |
| 17    | Lamb et al. 2020 <sup>17</sup>      | New York City, USA                                       | Anonymized location data from cell phone visits to businesses obtained via SafeGraph                                     | COVID-19 case positivity                                               | <ul style="list-style-type: none"> <li>Increases in mobility are independently associated with decreased case positivity.</li> </ul>                                                                                                                                                                                                                                                                                                                                                                           |
| 18    | Leung et al. 2021 <sup>18</sup>     | Hong Kong, China                                         | Number of transactions on Octopus cards (used for transportation and small retail payments)                              | Reproduction number                                                    | <ul style="list-style-type: none"> <li>R estimates are highly correlated with the number of Octopus transactions for transport: the Pearson's correlation coefficients are 0.62, 0.68, 0.80, and 0.76 for children, students, adults, and the elderly, respectively.</li> </ul>                                                                                                                                                                                                                                |
| 19    | Li et al. 2020 <sup>19</sup>        | Multiple counties, USA                                   | Multiple Google community mobility metrics                                                                               | Growth rate of COVID-19 cases                                          | <ul style="list-style-type: none"> <li>Mobility metrics have significant correlations with growth rate of COVID-19 cases 11 days later.</li> </ul>                                                                                                                                                                                                                                                                                                                                                             |
| 20    | Monod et al. 2021 <sup>20</sup>     | Multiple states, USA                                     | Age-specific human mobility trends derived from the Foursquare Labs Inc.                                                 | Reproduction number                                                    | <ul style="list-style-type: none"> <li>The high reproduction numbers from adults are linked both to rebounding mobility over the summer and elevated transmission risks per venue visit among adults aged 20 to 49.</li> </ul>                                                                                                                                                                                                                                                                                 |
| 21    | Nakanishi et al. 2021 <sup>21</sup> | Tokyo, Japan                                             | Population volumes at 10 PM to midnight estimated from phone location data by LocationMind xPop.                         | Reproduction number                                                    | <ul style="list-style-type: none"> <li>R significantly increased 3 weeks after the night-time population volume increased.</li> </ul>                                                                                                                                                                                                                                                                                                                                                                          |
| 22    | Sartorius et al. 2021 <sup>22</sup> | Multiple Middle Layer Super Output Areas (MSOA), England | The population movement provided by Cuebiq, which is a location intelligence and measurement platform                    | COVID-19 case                                                          | <ul style="list-style-type: none"> <li>A decrease in mobility at MSA scale has had a significant reduction on caseloads.</li> <li>The change in mobility significantly interacts with population density within a MSA, i.e. the impact of higher mobility is amplified by increasing population density.</li> </ul>                                                                                                                                                                                            |
| 23    | Sehra et al. 2020 <sup>23</sup>     | Multiple counties, USA                                   | Google workplace mobility metric                                                                                         | The slope of change in the 7-day rolling average for new COVID-19 case | <ul style="list-style-type: none"> <li>Counties with the lowest workplace activity had an average slope of change in new cases of 5.64 (4.60, 6.68) per 100 000 population as compared to 7.88 (6.92, 8.84) in the counties with the highest workplace activity (P&lt;0.001).</li> </ul>                                                                                                                                                                                                                       |
| 24    | Steiger et al. 2021 <sup>24</sup>   | Multiple districts, Germany                              | Multiple Google community mobility metrics                                                                               | COVID-19 case                                                          | <ul style="list-style-type: none"> <li><b>Daily reported case number increases by 0.11% for every 1% increase in retail/recreation mobility, by 0.33% for every 1% increase in workplace mobility, and by 0.26% for every 1% increase in transit stations mobility.</b></li> <li><b>Daily reported case number decreases by 0.23% for every 1% increase in grocery/pharmacy mobility, by 0.03% for every 1% increase in parks mobility, and by 0.97% for every 1% increase in residential stay.</b></li> </ul> |
| 25    | Unwin et al. 2020 <sup>25</sup>     | Multiple states, USA                                     | Average mobility metrics and residential mobility derived from Google community mobility reports                         | Reproduction number                                                    | <ul style="list-style-type: none"> <li><b>62% reduction in average mobility could reduce R by 37%</b></li> <li><b>33% increase in residential stay could reduce R by 5%</b></li> </ul>                                                                                                                                                                                                                                                                                                                         |
| 26    | Wang et al. 2020 <sup>26</sup>      | Multiple cities, China                                   | Mobility scale index (MSI) from internet services company, Baidu                                                         | COVID-19 case                                                          | <ul style="list-style-type: none"> <li>Each 1 unit increase in daily MSI is significantly positively associated with daily confirmed cases of COVID-19 in all lag days and the correlation is strongest at the lag of 14 days.</li> </ul>                                                                                                                                                                                                                                                                      |

| Index | Reference                        | Location and country       | Mobility metric(s)                                                               | Main outcome measure          | Main findings on the association between mobility and transmission                                                                                                                              |
|-------|----------------------------------|----------------------------|----------------------------------------------------------------------------------|-------------------------------|-------------------------------------------------------------------------------------------------------------------------------------------------------------------------------------------------|
| 27    | Wang et al. 2020 <sup>27</sup>   | Multiple states, Australia | Multiple Google community mobility metrics                                       | Growth rate of COVID-19 cases | <ul style="list-style-type: none"> <li>Inconsistent relationship between mobility and COVID-19 spread, which varies by date and by mobility type.</li> </ul>                                    |
| 28    | Xiong et al. 2020 <sup>28</sup>  | Multiple counties, USA     | County-level daily mobility inflow                                               | COVID-19 case                 | <ul style="list-style-type: none"> <li><b>Every 10% increase in mobility inflow is associated with 2.34% increase in COVID-19 case one week later</b></li> </ul>                                |
| 29    | Yang et al. 2020 <sup>29</sup>   | Multiple cities, China     | Intra-city travel intensity from internet services company, Baidu                | Growth rate of COVID-19 cases | <ul style="list-style-type: none"> <li>Correlation coefficient between the average intracity travel intensity and the average growth rate of COVID-19 cases five days after is 0.86.</li> </ul> |
| 30    | Younis et al. 2020 <sup>30</sup> | Multiple counties, USA     | Multiple Google community mobility metrics                                       | Reproduction number           | <ul style="list-style-type: none"> <li>Correlation coefficient between various mobility metrics and R ranges 0.66 to 0.89.</li> </ul>                                                           |
| 31    | Zheng et al. 2021 <sup>31</sup>  | Multiple states, USA       | Multiple Google community mobility metrics                                       | COVID-19 case                 | <ul style="list-style-type: none"> <li>Correlation coefficient between various mobility metrics and R ranges 0.22 to 0.48.</li> </ul>                                                           |
| 32    | Zhou et al. 2020 <sup>32</sup>   | Shenzhen, China            | Anonymized location data from cell phone provided by cell phone service provider | Reproduction number           | <ul style="list-style-type: none"> <li><b>A 20% reduction in mobility is associated with a 25% reduction in transmissibility.</b></li> </ul>                                                    |
| 33    | Zhu et al. 2020 <sup>33</sup>    | Multiple cities, China     | Intra-city travel intensity from internet services company, Baidu                | COVID-19 case                 | <ul style="list-style-type: none"> <li>A unit increase in human mobility index is associated with a 6.45% increase in daily COVID-19 cases.</li> </ul>                                          |

Findings that presented interpretable effect size of community mobility metrics on transmission of SARS-CoV-2 are highlighted **in bold**.

Studies were identified through a rapid literature search in PubMed using the combination of the following search terms: COVID-19 or SARS-CoV-2, mobility and transmission. The following criteria are applied for selection of the publications: 1) peer-reviewed studies (i.e. excluding pre-prints) published between 1-Jan-2020 and 18-Jun-2021 that assessed the association between real-world community mobility metrics and transmission of SARS-CoV-2 at local level; 2) studies are not included if they used mobility data only for mechanistic/statistical model fitting without assessing their specific effects on / association with transmission of SARS-CoV-2; 3) studies are not included if they only assessed the association between mobility restrictions and real-world mobility metrics (i.e. treating mobility metrics as the outcome; 4) studies are not included if they focused on a special group of population (e.g. health-care workers).

**Table S2. Summary of datasets included in the analysis**

| Index | Name                                                           | Description                                                                                                                                                                                                                                                                                                                                                                                                                                                                                                                                                                                                                                                                                                                                                                                                      |
|-------|----------------------------------------------------------------|------------------------------------------------------------------------------------------------------------------------------------------------------------------------------------------------------------------------------------------------------------------------------------------------------------------------------------------------------------------------------------------------------------------------------------------------------------------------------------------------------------------------------------------------------------------------------------------------------------------------------------------------------------------------------------------------------------------------------------------------------------------------------------------------------------------|
| 1     | Google COVID-19 Community Mobility Reports <sup>34,35</sup>    | The dataset consists of daily aggregated data on changes in visits and length of stay at different location categories compared to the baseline period, defined as 3rd Jan to 6th Feb, 2020, based on data from users who have opted-in to “location history” for their Google accounts.<br>Six mobility metrics are available in the Google community mobility dataset: visits to retail and recreation places (e.g. restaurants, cafes, shopping centres, theme parks, museums, libraries, and movie theatres), visits to grocery and pharmacy (e.g. grocery markets, food warehouses, farmers markets, specialty food shops, and pharmacies), visits to transit stations (e.g. bus, underground and train stations), visits to parks, visits to workplaces, and length of stay in residential places.         |
| 2     | Apple Maps Mobility Trends Reports <sup>36</sup>               | The dataset reports the relative volume of daily directions requests (categorised into walking, driving and public transit), compared to a pre-pandemic baseline volume on 13 <sup>th</sup> Jan 2020 for 16 major cities of the UK: Belfast, Birmingham, Bradford, Bristol, Cardiff, Edinburgh, Glasgow, Leeds, Liverpool, London, Manchester, Newcastle upon Tyne, Nottingham, Portsmouth, Reading, and Sheffield.                                                                                                                                                                                                                                                                                                                                                                                              |
| 3     | COVID-19 Local, Imperial College London <sup>37,38</sup>       | The dataset consists of daily Rt estimates for local authorities of the UK. The Rt for each local authority was estimated based on the reported COVID-19 cases and deaths by semi-mechanistic Bayesian models. <sup>38</sup> Rt was estimated based on projected infections that were back-calculated from the reported cases and deaths, through the two parameters infection ascertainment rate and infection fatality ratio, respectively. The time lags between infection and reporting of cases, and between infection and reporting of deaths were accounted for in the model so the R estimate was expected to reflect the instantaneous transmissibility of SARS-CoV-2. The local authority R data are published as 30%, 60% and 90% credible intervals and are available from 1 <sup>st</sup> Jun 2020. |
| 4     | UK population density <sup>39,40</sup>                         | The dataset consists of population density data for the year 2019.                                                                                                                                                                                                                                                                                                                                                                                                                                                                                                                                                                                                                                                                                                                                               |
| 5     | The Legatum Institute UK Prosperity Index (2016) <sup>41</sup> | The dataset consists of local-authority-specific prosperity index for the year 2016. The prosperity index, ranging between 0 and 1, defines and measures prosperity through seven pillars—economic quality, business environment, education, health, safety & security, social capital, and natural environment. <sup>42</sup> A higher prosperity index indicates less deprivation.                                                                                                                                                                                                                                                                                                                                                                                                                             |
| 6     | 2011 UK Census data <sup>43</sup>                              | The dataset consists of all 2011 UK Census data. For the current analysis, we extracted the number and proportion of households with six or more people, and the number and proportion of BAME population per local authority.                                                                                                                                                                                                                                                                                                                                                                                                                                                                                                                                                                                   |

BAME = Black, Asian and minority ethnic.

**Table S3. Summary of secondary analyses in comparison with the main analysis**

| Index | Objective(s)                                                                                                                                                                                                                           | Individual-local-authority level analysis (Figure 1)                                                                                                                                                       | Meta-analysis across local authorities                                                                                                                                                                         | Results available at |
|-------|----------------------------------------------------------------------------------------------------------------------------------------------------------------------------------------------------------------------------------------|------------------------------------------------------------------------------------------------------------------------------------------------------------------------------------------------------------|----------------------------------------------------------------------------------------------------------------------------------------------------------------------------------------------------------------|----------------------|
| 1     | Assess whether use of public transportation was associated with increased R in cities                                                                                                                                                  | Two separate analyses, both limiting data to 16 major cities* of the UK:<br>1. same as the main analysis<br>2. using the Apple public transit requests in replace of the Google visits to transit stations | Same as the main analysis                                                                                                                                                                                      | Table 1              |
| 2     | Exclude the mobility metric of residential areas since it had a different measure (i.e. time length) from other metrics (i.e. number of visits)                                                                                        | The independent variable residential stay removed from the main analysis                                                                                                                                   | Same as the main analysis                                                                                                                                                                                      | Figure S2            |
| 3     | Account for autocorrelation                                                                                                                                                                                                            | The error term in the main analysis replaced with an autoregressive error term AR(1)                                                                                                                       | Same as the main analysis                                                                                                                                                                                      | Figure S2            |
| 4     | Explore lagged effects                                                                                                                                                                                                                 | The R ratio of time i replaced with the R ratio of time i+1 while independent variables being the same as the main analysis                                                                                | Same as the main analysis                                                                                                                                                                                      | Figure S2            |
| 5     | Obtain results by region                                                                                                                                                                                                               | Same as the main analysis                                                                                                                                                                                  | Separately by region                                                                                                                                                                                           | Table 2              |
| 6     | Explore whether the observed association differed by R level                                                                                                                                                                           | Stratified by R level (0.5–1.0 and 1.0–1.5)                                                                                                                                                                | Separately by R level                                                                                                                                                                                          | Table 3              |
| 7     | Explore whether the observed association changed over time                                                                                                                                                                             | Among 13-week moving time windows with the step of two weeks                                                                                                                                               | Separately by time window                                                                                                                                                                                      | Figure 3             |
| 8     | Explore whether the association was modified by population density, deprivation, proportion of BAME population, latitude and proportion of large household†(for the metric of time spent in residential areas only) of local authority | Same as the main analysis                                                                                                                                                                                  | Meta-regression using population density, prosperity score, proportion of BAME population, latitude and proportion of large household (for the metric of time length at residential areas only) as covariates. | Table S4             |

BAME = Black, Asian and minority ethnic.

\*Belfast, Birmingham, Bradford, Bristol, Cardiff, Edinburgh, Glasgow, Leeds, Liverpool, London, Manchester, Newcastle upon Tyne, Nottingham, Portsmouth, Reading, and Sheffield.

†Defined as households with six or more members.

**Table S4. Association between six Google mobility metrics and R by individual local authority, as R ratio (95% CI)**

| Local authority                              | Retail & recreation<br>(per weekly increase of<br>15% of the baseline<br>visits) | Grocery & pharmacy<br>(per weekly increase of<br>5% of the baseline<br>visits) | Transit stations<br>(per weekly increase of<br>10% of the baseline<br>visits) | Parks<br>(per weekly increase of<br>40% of the baseline<br>visits) | Workplaces<br>(per weekly increase of<br>10% of the baseline<br>visits) | Residential<br>(per weekly increase of<br>5% of the baseline time<br>length) |
|----------------------------------------------|----------------------------------------------------------------------------------|--------------------------------------------------------------------------------|-------------------------------------------------------------------------------|--------------------------------------------------------------------|-------------------------------------------------------------------------|------------------------------------------------------------------------------|
| <b>Aberdeen City</b>                         | 1.537 (0.889–2.659)                                                              | 0.986 (0.826–1.177)                                                            | 1.332 (0.879–2.017)                                                           | 0.951 (0.788–1.148)                                                | 1.053 (0.698–1.590)                                                     | 1.074 (0.595–1.939)                                                          |
| <b>Aberdeenshire</b>                         | 0.800 (0.486–1.315)                                                              | 1.084 (0.899–1.307)                                                            | 0.942 (0.722–1.228)                                                           | 1.022 (0.743–1.407)                                                | 0.986 (0.727–1.336)                                                     | 0.737 (0.386–1.408)                                                          |
| <b>Allerdale</b>                             | 1.007 (0.811–1.250)                                                              | 1.064 (0.936–1.208)                                                            | 0.965 (0.805–1.157)                                                           | 0.965 (0.857–1.087)                                                | 1.115 (0.845–1.471)                                                     | 0.866 (0.478–1.569)                                                          |
| <b>Amber Valley</b>                          | 1.041 (0.862–1.257)                                                              | 1.051 (0.943–1.171)                                                            | 0.963 (0.842–1.102)                                                           | 0.929 (0.813–1.061)                                                | 1.029 (0.891–1.190)                                                     | 0.753 (0.511–1.111)                                                          |
| <b>Angus</b>                                 | 1.114 (0.828–1.499)                                                              | 1.067 (0.927–1.227)                                                            | 0.982 (0.858–1.123)                                                           | 0.975 (0.895–1.062)                                                | 1.025 (0.878–1.195)                                                     | 0.938 (0.625–1.407)                                                          |
| <b>Ards &amp; North Down</b>                 | 1.102 (0.910–1.334)                                                              | 1.004 (0.946–1.067)                                                            | 0.982 (0.904–1.068)                                                           | 0.965 (0.797–1.168)                                                | 0.970 (0.754–1.248)                                                     | 0.916 (0.561–1.498)                                                          |
| <b>Argyll &amp; Bute</b>                     | 1.115 (0.947–1.313)                                                              | 0.997 (0.934–1.064)                                                            | 0.986 (0.906–1.072)                                                           | 0.972 (0.895–1.057)                                                | 1.009 (0.898–1.135)                                                     | 0.930 (0.709–1.220)                                                          |
| <b>Arun</b>                                  | 1.102 (0.921–1.317)                                                              | 1.012 (0.906–1.130)                                                            | 1.041 (0.894–1.213)                                                           | 0.984 (0.931–1.040)                                                | 1.174 (0.978–1.410)                                                     | 1.090 (0.731–1.624)                                                          |
| <b>Ashfield</b>                              | 1.060 (0.869–1.293)                                                              | 1.011 (0.934–1.093)                                                            | 0.988 (0.910–1.073)                                                           | 0.938 (0.805–1.094)                                                | 1.051 (0.892–1.238)                                                     | 0.807 (0.550–1.183)                                                          |
| <b>Ashford</b>                               | 1.015 (0.884–1.165)                                                              | 0.993 (0.883–1.117)                                                            | 1.043 (0.850–1.279)                                                           | 0.922 (0.750–1.134)                                                | 1.110 (0.889–1.386)                                                     | 1.079 (0.692–1.684)                                                          |
| <b>Aylesbury Vale</b>                        | 1.129 (0.921–1.385)                                                              | 0.963 (0.873–1.062)                                                            | 1.019 (0.888–1.170)                                                           | 0.971 (0.849–1.110)                                                | 1.098 (0.936–1.287)                                                     | 1.036 (0.647–1.659)                                                          |
| <b>Babergh</b>                               | 1.090 (0.943–1.259)                                                              | 1.040 (0.954–1.134)                                                            | 0.946 (0.862–1.037)                                                           | 0.953 (0.818–1.111)                                                | 1.162 (0.957–1.410)                                                     | 0.978 (0.753–1.271)                                                          |
| <b>Barking &amp; Dagenham</b>                | 1.075 (0.909–1.271)                                                              | 0.982 (0.885–1.090)                                                            | 1.063 (0.834–1.355)                                                           | 0.964 (0.883–1.053)                                                | 1.082 (0.932–1.257)                                                     | 1.026 (0.717–1.470)                                                          |
| <b>Barnet</b>                                | 1.056 (0.887–1.257)                                                              | 0.980 (0.871–1.102)                                                            | 1.049 (0.742–1.484)                                                           | 0.962 (0.878–1.054)                                                | 1.120 (0.920–1.365)                                                     | 0.997 (0.670–1.484)                                                          |
| <b>Barnsley</b>                              | 1.169 (0.912–1.500)                                                              | 0.960 (0.839–1.099)                                                            | 1.022 (0.868–1.204)                                                           | 0.919 (0.776–1.089)                                                | 1.004 (0.760–1.328)                                                     | 0.968 (0.626–1.494)                                                          |
| <b>Basildon</b>                              | 1.042 (0.876–1.239)                                                              | 0.947 (0.863–1.039)                                                            | 1.006 (0.821–1.233)                                                           | 0.955 (0.796–1.146)                                                | 1.011 (0.817–1.251)                                                     | 1.010 (0.718–1.421)                                                          |
| <b>Basingstoke &amp; Deane</b>               | 1.061 (0.803–1.403)                                                              | 1.026 (0.933–1.128)                                                            | 1.008 (0.825–1.232)                                                           | 0.967 (0.776–1.204)                                                | 1.115 (0.900–1.381)                                                     | 0.973 (0.528–1.793)                                                          |
| <b>Bassetlaw</b>                             | 1.030 (0.912–1.164)                                                              | 0.995 (0.949–1.043)                                                            | 0.976 (0.905–1.053)                                                           | 0.853 (0.755–0.963)                                                | 0.956 (0.832–1.099)                                                     | 0.717 (0.507–1.015)                                                          |
| <b>Bath &amp; North East Somerset</b>        | 1.083 (0.933–1.258)                                                              | 1.015 (0.887–1.162)                                                            | 0.937 (0.721–1.218)                                                           | 0.977 (0.840–1.137)                                                | 1.172 (0.921–1.490)                                                     | 0.939 (0.627–1.406)                                                          |
| <b>Bedford</b>                               | 1.083 (0.915–1.282)                                                              | 0.978 (0.911–1.050)                                                            | 1.065 (0.882–1.286)                                                           | 0.970 (0.877–1.073)                                                | 1.114 (0.962–1.291)                                                     | 1.130 (0.826–1.546)                                                          |
| <b>Belfast</b>                               | 1.028 (0.706–1.496)                                                              | 1.015 (0.906–1.138)                                                            | 0.981 (0.703–1.370)                                                           | 0.922 (0.674–1.260)                                                | 1.029 (0.734–1.444)                                                     | 0.762 (0.426–1.361)                                                          |
| <b>Bexley</b>                                | 1.146 (0.960–1.367)                                                              | 0.995 (0.892–1.109)                                                            | 1.076 (0.833–1.390)                                                           | 0.944 (0.833–1.069)                                                | 1.035 (0.805–1.331)                                                     | 1.055 (0.723–1.537)                                                          |
| <b>Birmingham</b>                            | 1.193 (1.009–1.410)                                                              | 1.016 (0.926–1.114)                                                            | 1.030 (0.798–1.331)                                                           | 0.978 (0.857–1.115)                                                | 1.047 (0.880–1.245)                                                     | 1.023 (0.671–1.559)                                                          |
| <b>Blaby</b>                                 | 1.082 (0.994–1.178)                                                              | 1.012 (0.968–1.058)                                                            | 0.975 (0.841–1.130)                                                           | 0.990 (0.946–1.036)                                                | 0.983 (0.901–1.073)                                                     | 1.002 (0.777–1.293)                                                          |
| <b>Blackpool</b>                             | 1.008 (0.936–1.085)                                                              | 1.040 (0.962–1.123)                                                            | 0.962 (0.881–1.052)                                                           | 1.001 (0.950–1.055)                                                | 1.059 (0.815–1.377)                                                     | 0.783 (0.468–1.308)                                                          |
| <b>Bolsover</b>                              | 1.031 (0.946–1.123)                                                              | 0.999 (0.917–1.088)                                                            | 0.996 (0.930–1.067)                                                           | 0.974 (0.895–1.060)                                                | 1.060 (0.895–1.255)                                                     | 0.831 (0.587–1.178)                                                          |
| <b>Bolton</b>                                | 1.178 (0.963–1.442)                                                              | 1.016 (0.917–1.125)                                                            | 0.987 (0.789–1.235)                                                           | 1.036 (0.881–1.219)                                                | 1.180 (0.954–1.458)                                                     | 1.068 (0.662–1.722)                                                          |
| <b>Bournemouth, Christchurch &amp; Poole</b> | 1.270 (1.000–1.612)                                                              | 1.030 (0.886–1.197)                                                            | 0.889 (0.659–1.200)                                                           | 1.027 (0.943–1.118)                                                | 1.282 (0.968–1.697)                                                     | 1.123 (0.661–1.910)                                                          |
| <b>Bracknell Forest</b>                      | 1.023 (0.888–1.178)                                                              | 0.988 (0.875–1.115)                                                            | 1.000 (0.894–1.119)                                                           | 0.990 (0.923–1.063)                                                | 1.103 (0.951–1.279)                                                     | 0.986 (0.790–1.230)                                                          |
| <b>Bradford</b>                              | 1.098 (0.891–1.353)                                                              | 1.004 (0.919–1.096)                                                            | 1.108 (0.919–1.337)                                                           | 0.961 (0.860–1.073)                                                | 0.986 (0.841–1.157)                                                     | 1.032 (0.670–1.590)                                                          |
| <b>Breckland</b>                             | 1.055 (0.849–1.310)                                                              | 1.029 (0.933–1.136)                                                            | 1.023 (0.893–1.172)                                                           | 0.908 (0.790–1.044)                                                | 1.113 (0.881–1.407)                                                     | 0.974 (0.585–1.622)                                                          |
| <b>Brent</b>                                 | 1.180 (1.009–1.379)                                                              | 0.998 (0.901–1.106)                                                            | 0.896 (0.652–1.231)                                                           | 1.005 (0.941–1.072)                                                | 1.090 (0.883–1.347)                                                     | 1.002 (0.707–1.422)                                                          |
| <b>Brentwood</b>                             | 1.052 (0.900–1.229)                                                              | 0.958 (0.889–1.033)                                                            | 1.027 (0.899–1.172)                                                           | 0.985 (0.844–1.150)                                                | 1.181 (0.965–1.446)                                                     | 1.070 (0.832–1.376)                                                          |
| <b>Bridgend</b>                              | 1.274 (0.952–1.705)                                                              | 0.989 (0.875–1.118)                                                            | 0.886 (0.706–1.112)                                                           | 1.002 (0.932–1.078)                                                | 1.039 (0.759–1.421)                                                     | 1.083 (0.603–1.944)                                                          |
| <b>Brighton &amp; Hove</b>                   | 1.106 (0.843–1.449)                                                              | 1.037 (0.861–1.248)                                                            | 0.964 (0.676–1.376)                                                           | 0.988 (0.855–1.142)                                                | 1.238 (0.903–1.697)                                                     | 1.084 (0.574–2.047)                                                          |
| <b>Bristol, City of</b>                      | 1.334 (0.835–2.129)                                                              | 1.055 (0.845–1.318)                                                            | 0.999 (0.572–1.745)                                                           | 1.005 (0.810–1.247)                                                | 1.283 (0.852–1.932)                                                     | 1.188 (0.564–2.502)                                                          |
| <b>Broadland</b>                             | 1.080 (0.964–1.209)                                                              | 1.025 (0.954–1.100)                                                            | 0.967 (0.882–1.061)                                                           | 0.954 (0.832–1.094)                                                | 1.108 (0.929–1.320)                                                     | 1.034 (0.801–1.334)                                                          |
| <b>Bromley</b>                               | 1.082 (0.937–1.249)                                                              | 0.976 (0.907–1.050)                                                            | 1.033 (0.844–1.264)                                                           | 0.966 (0.846–1.103)                                                | 1.095 (0.904–1.326)                                                     | 1.042 (0.750–1.446)                                                          |
| <b>Bromsgrove</b>                            | 1.118 (1.004–1.245)                                                              | 1.007 (0.950–1.068)                                                            | 1.046 (0.975–1.122)                                                           | 0.949 (0.871–1.034)                                                | 1.111 (0.963–1.282)                                                     | 1.138 (0.816–1.587)                                                          |

| Local authority                    | Retail & recreation<br>(per weekly increase of<br>15% of the baseline<br>visits) | Grocery & pharmacy<br>(per weekly increase of<br>5% of the baseline<br>visits) | Transit stations<br>(per weekly increase of<br>10% of the baseline<br>visits) | Parks<br>(per weekly increase of<br>40% of the baseline<br>visits) | Workplaces<br>(per weekly increase of<br>10% of the baseline<br>visits) | Residential<br>(per weekly increase of<br>5% of the baseline time<br>length)) |
|------------------------------------|----------------------------------------------------------------------------------|--------------------------------------------------------------------------------|-------------------------------------------------------------------------------|--------------------------------------------------------------------|-------------------------------------------------------------------------|-------------------------------------------------------------------------------|
| <b>Broxbourne</b>                  | 1.033 (0.897–1.190)                                                              | 0.981 (0.914–1.051)                                                            | 1.017 (0.902–1.147)                                                           | 0.964 (0.846–1.099)                                                | 1.059 (0.905–1.241)                                                     | 0.974 (0.747–1.269)                                                           |
| <b>Broxtowe</b>                    | 0.992 (0.834–1.180)                                                              | 1.039 (0.935–1.155)                                                            | 1.059 (0.878–1.277)                                                           | 0.982 (0.777–1.241)                                                | 1.075 (0.780–1.481)                                                     | 0.890 (0.547–1.447)                                                           |
| <b>Burnley</b>                     | 1.299 (1.036–1.628)                                                              | 0.980 (0.908–1.057)                                                            | 1.204 (0.948–1.529)                                                           | 0.984 (0.881–1.099)                                                | 0.896 (0.699–1.149)                                                     | 1.367 (0.894–2.091)                                                           |
| <b>Bury</b>                        | 1.025 (0.864–1.215)                                                              | 1.045 (0.966–1.130)                                                            | 1.020 (0.915–1.136)                                                           | 0.982 (0.900–1.072)                                                | 1.004 (0.849–1.188)                                                     | 0.846 (0.598–1.197)                                                           |
| <b>Caerphilly</b>                  | 1.300 (0.912–1.853)                                                              | 0.977 (0.812–1.177)                                                            | 0.742 (0.500–1.099)                                                           | 1.028 (0.890–1.188)                                                | 1.151 (0.758–1.746)                                                     | 0.906 (0.474–1.729)                                                           |
| <b>Calderdale</b>                  | 1.056 (0.894–1.247)                                                              | 1.026 (0.949–1.110)                                                            | 1.008 (0.837–1.214)                                                           | 0.918 (0.746–1.128)                                                | 1.032 (0.865–1.231)                                                     | 0.933 (0.590–1.474)                                                           |
| <b>Cambridge</b>                   | 0.837 (0.614–1.142)                                                              | 1.100 (0.983–1.231)                                                            | 1.127 (0.734–1.732)                                                           | 0.834 (0.696–0.999)                                                | 1.012 (0.792–1.293)                                                     | 0.687 (0.400–1.181)                                                           |
| <b>Camden</b>                      | 0.882 (0.596–1.307)                                                              | 0.908 (0.769–1.072)                                                            | 1.561 (0.911–2.676)                                                           | 0.976 (0.822–1.159)                                                | 1.006 (0.847–1.195)                                                     | 1.018 (0.724–1.431)                                                           |
| <b>Cannock Chase</b>               | 1.051 (0.862–1.280)                                                              | 1.021 (0.946–1.103)                                                            | 1.044 (0.974–1.120)                                                           | 0.951 (0.849–1.066)                                                | 1.120 (0.960–1.308)                                                     | 0.992 (0.718–1.372)                                                           |
| <b>Canterbury</b>                  | 1.161 (0.988–1.365)                                                              | 0.945 (0.854–1.046)                                                            | 0.992 (0.854–1.152)                                                           | 1.019 (0.955–1.087)                                                | 1.142 (0.949–1.375)                                                     | 1.267 (0.905–1.775)                                                           |
| <b>Cardiff</b>                     | 1.146 (0.787–1.668)                                                              | 0.906 (0.771–1.063)                                                            | 1.105 (0.689–1.772)                                                           | 1.078 (0.810–1.434)                                                | 1.184 (0.868–1.613)                                                     | 1.174 (0.660–2.088)                                                           |
| <b>Carlisle</b>                    | 0.959 (0.765–1.202)                                                              | 1.130 (0.980–1.304)                                                            | 0.987 (0.785–1.241)                                                           | 0.829 (0.606–1.134)                                                | 1.054 (0.707–1.570)                                                     | 0.730 (0.398–1.341)                                                           |
| <b>Carmarthenshire</b>             | 1.121 (0.915–1.374)                                                              | 0.953 (0.880–1.033)                                                            | 0.933 (0.808–1.077)                                                           | 1.037 (0.916–1.174)                                                | 1.016 (0.847–1.220)                                                     | 0.900 (0.602–1.345)                                                           |
| <b>Causeway Coast &amp; Glens</b>  | 1.041 (0.858–1.264)                                                              | 1.035 (0.963–1.112)                                                            | 0.961 (0.816–1.131)                                                           | 0.989 (0.903–1.083)                                                | 1.012 (0.777–1.318)                                                     | 0.861 (0.499–1.485)                                                           |
| <b>Central Bedfordshire</b>        | 1.059 (0.851–1.318)                                                              | 0.966 (0.871–1.072)                                                            | 0.996 (0.826–1.200)                                                           | 0.950 (0.851–1.061)                                                | 1.057 (0.873–1.279)                                                     | 0.948 (0.593–1.516)                                                           |
| <b>Charnwood</b>                   | 0.945 (0.728–1.227)                                                              | 1.070 (0.962–1.189)                                                            | 0.976 (0.818–1.164)                                                           | 0.941 (0.845–1.049)                                                | 0.975 (0.809–1.176)                                                     | 0.739 (0.462–1.180)                                                           |
| <b>Chelmsford</b>                  | 1.058 (0.884–1.267)                                                              | 0.968 (0.862–1.087)                                                            | 0.992 (0.872–1.129)                                                           | 0.965 (0.847–1.099)                                                | 1.087 (0.894–1.323)                                                     | 0.981 (0.638–1.507)                                                           |
| <b>Cheltenham</b>                  | 1.070 (0.951–1.204)                                                              | 1.003 (0.943–1.067)                                                            | 1.001 (0.948–1.058)                                                           | 0.989 (0.912–1.072)                                                | 1.062 (0.916–1.230)                                                     | 0.959 (0.744–1.237)                                                           |
| <b>Cherwell</b>                    | 0.953 (0.773–1.175)                                                              | 1.036 (0.935–1.148)                                                            | 1.024 (0.849–1.234)                                                           | 0.839 (0.619–1.136)                                                | 1.138 (0.901–1.436)                                                     | 0.778 (0.434–1.392)                                                           |
| <b>Cheshire East</b>               | 1.049 (0.911–1.208)                                                              | 1.006 (0.929–1.089)                                                            | 1.115 (0.955–1.302)                                                           | 0.973 (0.869–1.089)                                                | 1.012 (0.859–1.192)                                                     | 0.927 (0.635–1.352)                                                           |
| <b>Cheshire West &amp; Chester</b> | 1.152 (0.972–1.366)                                                              | 1.024 (0.925–1.133)                                                            | 1.001 (0.873–1.147)                                                           | 1.017 (0.820–1.262)                                                | 1.073 (0.813–1.416)                                                     | 1.037 (0.625–1.718)                                                           |
| <b>Chesterfield</b>                | 1.005 (0.860–1.175)                                                              | 1.035 (0.953–1.123)                                                            | 1.077 (0.908–1.278)                                                           | 0.932 (0.852–1.020)                                                | 1.104 (0.936–1.303)                                                     | 0.872 (0.613–1.239)                                                           |
| <b>Chichester</b>                  | 1.030 (0.878–1.208)                                                              | 1.042 (0.956–1.135)                                                            | 1.003 (0.870–1.156)                                                           | 0.931 (0.778–1.113)                                                | 1.161 (0.943–1.430)                                                     | 0.979 (0.630–1.523)                                                           |
| <b>Chiltern</b>                    | 1.069 (0.946–1.208)                                                              | 0.990 (0.919–1.067)                                                            | 1.022 (0.884–1.182)                                                           | 0.955 (0.902–1.012)                                                | 1.092 (0.964–1.238)                                                     | 0.984 (0.785–1.233)                                                           |
| <b>Chorley</b>                     | 0.998 (0.892–1.118)                                                              | 1.030 (0.965–1.100)                                                            | 1.022 (0.960–1.088)                                                           | 0.971 (0.911–1.036)                                                | 1.039 (0.886–1.218)                                                     | 0.832 (0.631–1.098)                                                           |
| <b>City of Edinburgh</b>           | 1.000 (0.643–1.555)                                                              | 0.963 (0.820–1.132)                                                            | 1.125 (0.713–1.776)                                                           | 0.993 (0.846–1.166)                                                | 0.891 (0.677–1.172)                                                     | 0.774 (0.502–1.193)                                                           |
| <b>Colchester</b>                  | 0.976 (0.815–1.169)                                                              | 1.047 (0.935–1.171)                                                            | 1.024 (0.787–1.332)                                                           | 0.930 (0.795–1.088)                                                | 1.065 (0.769–1.474)                                                     | 0.896 (0.554–1.449)                                                           |
| <b>Conwy</b>                       | 1.032 (0.899–1.186)                                                              | 1.014 (0.948–1.084)                                                            | 0.977 (0.905–1.055)                                                           | 1.002 (0.939–1.069)                                                | 1.006 (0.872–1.162)                                                     | 0.949 (0.711–1.266)                                                           |
| <b>Copeland</b>                    | 1.058 (0.803–1.393)                                                              | 1.039 (0.926–1.164)                                                            | 1.058 (0.967–1.158)                                                           | 0.943 (0.826–1.077)                                                | 0.997 (0.724–1.373)                                                     | 0.790 (0.445–1.405)                                                           |
| <b>Cornwall</b>                    | 1.187 (0.937–1.505)                                                              | 0.969 (0.786–1.194)                                                            | 1.000 (0.739–1.352)                                                           | 0.906 (0.796–1.031)                                                | 0.910 (0.673–1.232)                                                     | 0.586 (0.301–1.142)                                                           |
| <b>Cotswold</b>                    | 1.003 (0.870–1.156)                                                              | 1.064 (0.958–1.181)                                                            | 0.977 (0.865–1.103)                                                           | 0.911 (0.756–1.099)                                                | 1.143 (0.954–1.369)                                                     | 0.854 (0.564–1.295)                                                           |
| <b>County Durham</b>               | 1.378 (1.006–1.888)                                                              | 1.015 (0.850–1.212)                                                            | 0.916 (0.653–1.284)                                                           | 0.951 (0.710–1.273)                                                | 0.969 (0.665–1.412)                                                     | 0.935 (0.411–2.131)                                                           |
| <b>Coventry</b>                    | 1.152 (0.942–1.408)                                                              | 1.046 (0.949–1.152)                                                            | 1.012 (0.791–1.294)                                                           | 0.982 (0.878–1.100)                                                | 1.057 (0.879–1.271)                                                     | 0.960 (0.624–1.476)                                                           |
| <b>Craven</b>                      | 1.075 (0.973–1.187)                                                              | 1.024 (0.940–1.115)                                                            | 1.006 (0.936–1.081)                                                           | 0.947 (0.849–1.056)                                                | 0.996 (0.846–1.172)                                                     | 0.964 (0.712–1.305)                                                           |
| <b>Crawley</b>                     | 1.034 (0.826–1.294)                                                              | 1.046 (0.920–1.189)                                                            | 1.041 (0.847–1.279)                                                           | 0.997 (0.928–1.072)                                                | 1.246 (0.970–1.602)                                                     | 0.991 (0.657–1.495)                                                           |
| <b>Croydon</b>                     | 1.010 (0.858–1.188)                                                              | 0.994 (0.910–1.085)                                                            | 1.162 (0.776–1.740)                                                           | 0.960 (0.870–1.060)                                                | 1.087 (0.892–1.325)                                                     | 1.011 (0.746–1.372)                                                           |
| <b>Dacorum</b>                     | 1.022 (0.870–1.199)                                                              | 0.994 (0.927–1.066)                                                            | 0.978 (0.890–1.075)                                                           | 0.956 (0.843–1.085)                                                | 1.071 (0.936–1.226)                                                     | 0.957 (0.691–1.325)                                                           |
| <b>Darlington</b>                  | 1.036 (0.923–1.162)                                                              | 0.967 (0.894–1.046)                                                            | 1.161 (0.968–1.392)                                                           | 0.981 (0.931–1.034)                                                | 0.991 (0.880–1.116)                                                     | 0.965 (0.767–1.215)                                                           |
| <b>Dartford</b>                    | 1.056 (0.940–1.187)                                                              | 1.003 (0.957–1.052)                                                            | 0.999 (0.854–1.169)                                                           | 1.000 (0.954–1.049)                                                | 1.161 (0.947–1.425)                                                     | 1.065 (0.833–1.362)                                                           |
| <b>Daventry</b>                    | 1.059 (0.920–1.220)                                                              | 1.012 (0.929–1.102)                                                            | 1.055 (0.940–1.185)                                                           | 0.883 (0.763–1.021)                                                | 1.077 (0.919–1.263)                                                     | 0.953 (0.707–1.285)                                                           |
| <b>Denbighshire</b>                | 1.016 (0.859–1.202)                                                              | 1.009 (0.924–1.102)                                                            | 1.104 (0.900–1.354)                                                           | 0.945 (0.860–1.039)                                                | 0.968 (0.834–1.124)                                                     | 1.024 (0.783–1.339)                                                           |
| <b>Derby</b>                       | 1.084 (0.879–1.337)                                                              | 1.049 (0.939–1.172)                                                            | 1.096 (0.847–1.417)                                                           | 0.982 (0.863–1.118)                                                | 1.074 (0.855–1.350)                                                     | 0.970 (0.638–1.473)                                                           |

| Local authority          | Retail & recreation<br>(per weekly increase of<br>15% of the baseline<br>visits) | Grocery & pharmacy<br>(per weekly increase of<br>5% of the baseline<br>visits) | Transit stations<br>(per weekly increase of<br>10% of the baseline<br>visits) | Parks<br>(per weekly increase of<br>40% of the baseline<br>visits) | Workplaces<br>(per weekly increase of<br>10% of the baseline<br>visits) | Residential<br>(per weekly increase of<br>5% of the baseline time<br>length)) |
|--------------------------|----------------------------------------------------------------------------------|--------------------------------------------------------------------------------|-------------------------------------------------------------------------------|--------------------------------------------------------------------|-------------------------------------------------------------------------|-------------------------------------------------------------------------------|
| Derbyshire Dales         | 1.031 (0.966-1.101)                                                              | 1.016 (0.972-1.061)                                                            | 0.990 (0.948-1.033)                                                           | 0.885 (0.756-1.035)                                                | 1.033 (0.915-1.166)                                                     | 0.818 (0.662-1.010)                                                           |
| Derry City & Strabane    | 1.161 (0.883-1.527)                                                              | 0.981 (0.867-1.110)                                                            | 0.962 (0.795-1.163)                                                           | 0.939 (0.606-1.455)                                                | 0.981 (0.653-1.473)                                                     | 0.685 (0.345-1.359)                                                           |
| Doncaster                | 1.004 (0.819-1.231)                                                              | 1.037 (0.918-1.171)                                                            | 0.931 (0.719-1.206)                                                           | 0.885 (0.740-1.059)                                                | 0.868 (0.633-1.191)                                                     | 0.589 (0.329-1.052)                                                           |
| Dorset                   | 1.055 (0.896-1.243)                                                              | 1.030 (0.920-1.154)                                                            | 0.974 (0.872-1.088)                                                           | 0.988 (0.870-1.121)                                                | 1.246 (0.891-1.743)                                                     | 0.985 (0.542-1.789)                                                           |
| Dover                    | 1.041 (0.947-1.144)                                                              | 1.011 (0.940-1.086)                                                            | 0.923 (0.865-0.984)                                                           | 0.992 (0.920-1.069)                                                | 1.048 (0.917-1.197)                                                     | 1.025 (0.768-1.368)                                                           |
| Dudley                   | 1.128 (0.898-1.417)                                                              | 1.032 (0.946-1.125)                                                            | 0.995 (0.917-1.079)                                                           | 0.969 (0.723-1.298)                                                | 1.107 (0.875-1.400)                                                     | 0.924 (0.544-1.569)                                                           |
| Dumfries & Galloway      | 1.215 (0.680-2.173)                                                              | 1.024 (0.865-1.212)                                                            | 1.067 (0.857-1.327)                                                           | 0.803 (0.581-1.111)                                                | 0.976 (0.661-1.440)                                                     | 0.865 (0.369-2.027)                                                           |
| Dundee City              | 1.252 (0.978-1.603)                                                              | 0.964 (0.865-1.075)                                                            | 1.044 (0.865-1.259)                                                           | 1.003 (0.898-1.120)                                                | 0.978 (0.809-1.182)                                                     | 0.958 (0.692-1.325)                                                           |
| Ealing                   | 1.067 (0.882-1.291)                                                              | 1.024 (0.913-1.149)                                                            | 0.844 (0.544-1.311)                                                           | 0.964 (0.884-1.051)                                                | 1.204 (0.953-1.521)                                                     | 0.856 (0.555-1.321)                                                           |
| East Cambridgeshire      | 1.055 (0.943-1.180)                                                              | 0.993 (0.944-1.045)                                                            | 0.985 (0.883-1.099)                                                           | 0.949 (0.851-1.058)                                                | 1.068 (0.936-1.219)                                                     | 0.999 (0.783-1.274)                                                           |
| East Devon               | 1.020 (0.922-1.129)                                                              | 1.018 (0.962-1.076)                                                            | 0.992 (0.922-1.067)                                                           | 1.007 (0.930-1.089)                                                | 1.171 (0.976-1.406)                                                     | 1.111 (0.786-1.570)                                                           |
| East Hampshire           | 1.048 (0.905-1.215)                                                              | 1.031 (0.932-1.140)                                                            | 1.014 (0.917-1.120)                                                           | 0.902 (0.790-1.030)                                                | 1.010 (0.876-1.164)                                                     | 0.837 (0.642-1.092)                                                           |
| East Hertfordshire       | 1.065 (0.936-1.211)                                                              | 1.033 (0.955-1.117)                                                            | 1.028 (0.965-1.094)                                                           | 0.951 (0.851-1.064)                                                | 1.048 (0.904-1.215)                                                     | 1.021 (0.780-1.336)                                                           |
| East Lindsey             | 1.040 (0.846-1.278)                                                              | 0.993 (0.931-1.059)                                                            | 0.969 (0.855-1.098)                                                           | 0.989 (0.851-1.148)                                                | 1.089 (0.922-1.286)                                                     | 0.834 (0.515-1.351)                                                           |
| East Lothian             | 1.213 (0.951-1.547)                                                              | 0.975 (0.878-1.083)                                                            | 1.024 (0.845-1.242)                                                           | 0.991 (0.925-1.062)                                                | 1.029 (0.901-1.175)                                                     | 1.077 (0.709-1.634)                                                           |
| East Northamptonshire    | 1.070 (0.967-1.184)                                                              | 0.995 (0.946-1.047)                                                            | 0.991 (0.951-1.033)                                                           | 0.958 (0.879-1.044)                                                | 1.121 (0.985-1.276)                                                     | 1.045 (0.820-1.333)                                                           |
| East Riding of Yorkshire | 1.163 (1.018-1.327)                                                              | 1.023 (0.943-1.110)                                                            | 0.981 (0.903-1.067)                                                           | 0.936 (0.866-1.012)                                                | 0.991 (0.831-1.181)                                                     | 0.872 (0.600-1.269)                                                           |
| East Staffordshire       | 1.102 (0.935-1.298)                                                              | 1.026 (0.957-1.100)                                                            | 1.018 (0.903-1.148)                                                           | 0.973 (0.905-1.046)                                                | 1.061 (0.917-1.228)                                                     | 1.009 (0.706-1.441)                                                           |
| East Suffolk             | 1.040 (0.914-1.183)                                                              | 1.050 (0.974-1.133)                                                            | 0.945 (0.862-1.036)                                                           | 1.014 (0.912-1.128)                                                | 1.146 (0.974-1.348)                                                     | 1.024 (0.748-1.403)                                                           |
| Eastbourne               | 1.014 (0.790-1.302)                                                              | 1.046 (0.929-1.177)                                                            | 1.008 (0.808-1.257)                                                           | 0.991 (0.901-1.091)                                                | 1.231 (0.970-1.561)                                                     | 1.178 (0.623-2.226)                                                           |
| Eastleigh                | 1.062 (0.806-1.398)                                                              | 1.054 (0.924-1.202)                                                            | 0.991 (0.813-1.209)                                                           | 0.990 (0.815-1.201)                                                | 1.249 (0.999-1.562)                                                     | 0.950 (0.539-1.673)                                                           |
| Eden                     | 1.002 (0.834-1.204)                                                              | 1.060 (0.996-1.128)                                                            | 0.917 (0.811-1.036)                                                           | 0.990 (0.858-1.142)                                                | 1.161 (0.956-1.409)                                                     | 0.936 (0.694-1.261)                                                           |
| Elmbridge                | 1.046 (0.889-1.230)                                                              | 1.001 (0.929-1.079)                                                            | 1.055 (0.933-1.192)                                                           | 0.958 (0.830-1.104)                                                | 1.110 (0.915-1.347)                                                     | 1.046 (0.757-1.445)                                                           |
| Enfield                  | 1.053 (0.859-1.290)                                                              | 0.975 (0.868-1.095)                                                            | 0.990 (0.689-1.421)                                                           | 0.942 (0.829-1.070)                                                | 1.069 (0.839-1.363)                                                     | 0.914 (0.591-1.416)                                                           |
| Epping Forest            | 1.091 (0.906-1.313)                                                              | 0.921 (0.844-1.004)                                                            | 1.121 (0.916-1.372)                                                           | 0.985 (0.922-1.052)                                                | 1.116 (0.946-1.317)                                                     | 1.115 (0.771-1.613)                                                           |
| Epsom & Ewell            | 1.026 (0.913-1.154)                                                              | 1.008 (0.957-1.062)                                                            | 1.004 (0.906-1.113)                                                           | 0.961 (0.881-1.048)                                                | 1.090 (0.981-1.212)                                                     | 0.968 (0.823-1.138)                                                           |
| Erewash                  | 1.034 (0.878-1.218)                                                              | 1.063 (0.988-1.143)                                                            | 0.983 (0.905-1.067)                                                           | 0.929 (0.831-1.038)                                                | 1.082 (0.932-1.256)                                                     | 0.804 (0.563-1.147)                                                           |
| Exeter                   | 1.236 (0.767-1.993)                                                              | 1.095 (0.823-1.456)                                                            | 1.111 (0.786-1.569)                                                           | 1.339 (0.874-2.050)                                                | 0.953 (0.522-1.741)                                                     | 1.668 (0.545-5.106)                                                           |
| Falkirk                  | 1.212 (0.976-1.506)                                                              | 1.008 (0.925-1.100)                                                            | 1.017 (0.873-1.185)                                                           | 0.982 (0.920-1.049)                                                | 0.874 (0.749-1.019)                                                     | 0.798 (0.581-1.097)                                                           |
| Fareham                  | 1.036 (0.857-1.251)                                                              | 1.037 (0.950-1.132)                                                            | 1.067 (0.888-1.282)                                                           | 0.957 (0.870-1.052)                                                | 1.127 (0.923-1.375)                                                     | 0.995 (0.654-1.513)                                                           |
| Fenland                  | 1.013 (0.894-1.148)                                                              | 1.007 (0.957-1.060)                                                            | 0.938 (0.887-0.990)                                                           | 0.975 (0.853-1.114)                                                | 1.134 (0.984-1.307)                                                     | 0.872 (0.663-1.148)                                                           |
| Fife                     | 1.159 (0.905-1.484)                                                              | 1.063 (0.933-1.212)                                                            | 1.012 (0.806-1.269)                                                           | 0.969 (0.850-1.104)                                                | 0.902 (0.755-1.078)                                                     | 0.823 (0.555-1.220)                                                           |
| Folkestone & Hythe       | 1.050 (0.951-1.160)                                                              | 1.011 (0.940-1.087)                                                            | 0.959 (0.885-1.039)                                                           | 1.011 (0.963-1.060)                                                | 1.185 (1.014-1.386)                                                     | 1.288 (0.972-1.708)                                                           |
| Forest of Dean           | 1.049 (0.942-1.170)                                                              | 1.018 (0.951-1.089)                                                            | 0.973 (0.889-1.066)                                                           | 0.989 (0.858-1.139)                                                | 1.019 (0.853-1.217)                                                     | 0.877 (0.642-1.198)                                                           |
| Fylde                    | 1.044 (0.960-1.135)                                                              | 1.017 (0.966-1.070)                                                            | 0.998 (0.938-1.062)                                                           | 0.971 (0.915-1.030)                                                | 1.055 (0.911-1.221)                                                     | 0.867 (0.668-1.125)                                                           |
| Gateshead                | 1.175 (1.010-1.368)                                                              | 0.993 (0.874-1.129)                                                            | 0.991 (0.816-1.205)                                                           | 0.944 (0.809-1.101)                                                | 1.022 (0.736-1.419)                                                     | 0.826 (0.543-1.256)                                                           |
| Gedling                  | 1.127 (0.949-1.340)                                                              | 1.006 (0.929-1.088)                                                            | 1.059 (0.940-1.194)                                                           | 0.963 (0.918-1.011)                                                | 1.154 (0.940-1.416)                                                     | 0.992 (0.664-1.480)                                                           |
| Glasgow City             | 0.950 (0.716-1.260)                                                              | 0.966 (0.855-1.092)                                                            | 1.270 (0.785-2.052)                                                           | 0.996 (0.885-1.122)                                                | 0.880 (0.734-1.056)                                                     | 0.870 (0.567-1.334)                                                           |
| Gloucester               | 1.065 (0.934-1.215)                                                              | 0.984 (0.896-1.080)                                                            | 0.957 (0.840-1.090)                                                           | 0.979 (0.910-1.053)                                                | 1.065 (0.881-1.286)                                                     | 0.885 (0.642-1.219)                                                           |
| Gosport                  | 1.000 (0.869-1.152)                                                              | 1.044 (0.963-1.131)                                                            | 0.980 (0.863-1.112)                                                           | 0.972 (0.901-1.048)                                                | 1.103 (0.952-1.277)                                                     | 0.887 (0.634-1.241)                                                           |
| Gravesham                | 1.096 (0.967-1.242)                                                              | 1.012 (0.941-1.089)                                                            | 1.041 (0.917-1.182)                                                           | 0.907 (0.772-1.065)                                                | 1.027 (0.890-1.186)                                                     | 1.068 (0.831-1.372)                                                           |
| Great Yarmouth           | 0.996 (0.834-1.190)                                                              | 1.024 (0.918-1.143)                                                            | 1.004 (0.921-1.096)                                                           | 1.003 (0.908-1.109)                                                | 1.163 (0.908-1.490)                                                     | 1.069 (0.731-1.564)                                                           |

| Local authority             | Retail & recreation<br>(per weekly increase of<br>15% of the baseline<br>visits) | Grocery & pharmacy<br>(per weekly increase of<br>5% of the baseline<br>visits) | Transit stations<br>(per weekly increase of<br>10% of the baseline<br>visits) | Parks<br>(per weekly increase of<br>40% of the baseline<br>visits) | Workplaces<br>(per weekly increase of<br>10% of the baseline<br>visits) | Residential<br>(per weekly increase of<br>5% of the baseline time<br>length)) |
|-----------------------------|----------------------------------------------------------------------------------|--------------------------------------------------------------------------------|-------------------------------------------------------------------------------|--------------------------------------------------------------------|-------------------------------------------------------------------------|-------------------------------------------------------------------------------|
| Greenwich                   | 1.079 (0.949-1.226)                                                              | 0.976 (0.879-1.084)                                                            | 1.128 (0.806-1.578)                                                           | 0.965 (0.852-1.094)                                                | 1.060 (0.855-1.314)                                                     | 1.072 (0.743-1.546)                                                           |
| Guildford                   | 1.025 (0.916-1.146)                                                              | 0.989 (0.943-1.038)                                                            | 1.058 (0.932-1.201)                                                           | 0.961 (0.830-1.113)                                                | 1.036 (0.918-1.169)                                                     | 0.966 (0.776-1.202)                                                           |
| Gwynedd                     | 1.022 (0.907-1.153)                                                              | 1.031 (0.947-1.122)                                                            | 1.038 (0.892-1.209)                                                           | 0.937 (0.791-1.111)                                                | 0.950 (0.776-1.163)                                                     | 0.933 (0.687-1.268)                                                           |
| Hackney                     | 0.861 (0.575-1.290)                                                              | 1.046 (0.886-1.235)                                                            | 1.545 (0.889-2.683)                                                           | 0.967 (0.834-1.122)                                                | 0.975 (0.671-1.416)                                                     | 1.040 (0.590-1.831)                                                           |
| Halton                      | 1.091 (0.835-1.427)                                                              | 1.039 (0.905-1.193)                                                            | 1.139 (0.923-1.405)                                                           | 1.003 (0.931-1.081)                                                | 0.860 (0.644-1.149)                                                     | 0.826 (0.500-1.365)                                                           |
| Hambleton                   | 1.038 (0.860-1.254)                                                              | 1.063 (0.964-1.172)                                                            | 0.974 (0.807-1.177)                                                           | 0.892 (0.755-1.054)                                                | 1.112 (0.915-1.351)                                                     | 0.763 (0.511-1.138)                                                           |
| Hammersmith & Fulham        | 1.016 (0.825-1.251)                                                              | 0.960 (0.837-1.099)                                                            | 1.177 (0.812-1.707)                                                           | 1.016 (0.880-1.173)                                                | 1.207 (0.917-1.590)                                                     | 1.079 (0.763-1.525)                                                           |
| Harborough                  | 1.042 (0.927-1.172)                                                              | 1.023 (0.960-1.091)                                                            | 1.002 (0.897-1.120)                                                           | 0.981 (0.918-1.050)                                                | 0.993 (0.904-1.091)                                                     | 0.920 (0.736-1.150)                                                           |
| Haringey                    | 0.955 (0.769-1.186)                                                              | 0.978 (0.848-1.129)                                                            | 1.154 (0.750-1.777)                                                           | 0.981 (0.886-1.086)                                                | 1.138 (0.910-1.423)                                                     | 1.038 (0.722-1.493)                                                           |
| Harlow                      | 1.024 (0.868-1.208)                                                              | 1.004 (0.924-1.092)                                                            | 0.967 (0.868-1.078)                                                           | 0.979 (0.933-1.028)                                                | 1.057 (0.922-1.212)                                                     | 0.901 (0.697-1.165)                                                           |
| Harrogate                   | 1.052 (0.870-1.272)                                                              | 0.991 (0.897-1.095)                                                            | 1.180 (0.967-1.439)                                                           | 0.905 (0.721-1.134)                                                | 1.126 (0.868-1.460)                                                     | 1.065 (0.625-1.817)                                                           |
| Harrow                      | 1.057 (0.938-1.191)                                                              | 0.988 (0.916-1.065)                                                            | 0.939 (0.712-1.238)                                                           | 0.987 (0.935-1.041)                                                | 1.124 (0.942-1.340)                                                     | 0.950 (0.707-1.277)                                                           |
| Hart                        | 1.007 (0.871-1.164)                                                              | 1.005 (0.956-1.056)                                                            | 1.050 (0.956-1.153)                                                           | 0.960 (0.835-1.103)                                                | 1.156 (0.976-1.368)                                                     | 1.045 (0.760-1.438)                                                           |
| Hastings                    | 1.145 (0.890-1.473)                                                              | 0.924 (0.793-1.075)                                                            | 0.985 (0.642-1.511)                                                           | 1.000 (0.888-1.126)                                                | 1.110 (0.833-1.480)                                                     | 1.141 (0.656-1.983)                                                           |
| Havant                      | 1.129 (0.908-1.403)                                                              | 1.026 (0.937-1.123)                                                            | 1.007 (0.847-1.197)                                                           | 0.984 (0.901-1.076)                                                | 1.172 (0.980-1.403)                                                     | 1.026 (0.579-1.817)                                                           |
| Hasving                     | 1.067 (0.877-1.298)                                                              | 0.981 (0.870-1.106)                                                            | 1.108 (0.822-1.494)                                                           | 0.948 (0.816-1.101)                                                | 1.041 (0.832-1.302)                                                     | 1.009 (0.687-1.483)                                                           |
| Herefordshire, County of    | 0.985 (0.779-1.245)                                                              | 1.126 (0.980-1.293)                                                            | 0.966 (0.835-1.118)                                                           | 0.818 (0.633-1.057)                                                | 0.991 (0.750-1.309)                                                     | 0.684 (0.379-1.233)                                                           |
| Hertsmere                   | 0.957 (0.769-1.191)                                                              | 0.981 (0.918-1.049)                                                            | 0.979 (0.818-1.172)                                                           | 0.935 (0.831-1.052)                                                | 1.053 (0.866-1.282)                                                     | 0.837 (0.590-1.187)                                                           |
| High Peak                   | 1.040 (0.920-1.174)                                                              | 1.046 (0.974-1.123)                                                            | 0.970 (0.882-1.068)                                                           | 0.986 (0.950-1.023)                                                | 1.102 (0.922-1.317)                                                     | 0.908 (0.646-1.275)                                                           |
| Highland                    | 0.935 (0.653-1.339)                                                              | 1.132 (0.978-1.311)                                                            | 1.079 (0.761-1.529)                                                           | 0.848 (0.668-1.075)                                                | 0.865 (0.673-1.111)                                                     | 0.731 (0.407-1.313)                                                           |
| Hillingdon                  | 1.080 (0.868-1.344)                                                              | 1.001 (0.912-1.099)                                                            | 0.982 (0.783-1.232)                                                           | 0.964 (0.873-1.065)                                                | 1.066 (0.899-1.264)                                                     | 0.923 (0.589-1.446)                                                           |
| Hinckley & Bosworth         | 1.044 (0.871-1.251)                                                              | 1.029 (0.956-1.108)                                                            | 0.968 (0.850-1.103)                                                           | 0.971 (0.875-1.078)                                                | 0.978 (0.867-1.103)                                                     | 0.845 (0.630-1.132)                                                           |
| Horsham                     | 1.086 (0.921-1.280)                                                              | 1.005 (0.915-1.105)                                                            | 1.039 (0.871-1.239)                                                           | 0.932 (0.801-1.085)                                                | 1.017 (0.861-1.200)                                                     | 0.943 (0.670-1.326)                                                           |
| Hounslow                    | 1.049 (0.848-1.297)                                                              | 1.015 (0.921-1.118)                                                            | 0.983 (0.690-1.401)                                                           | 0.947 (0.858-1.045)                                                | 1.148 (0.929-1.418)                                                     | 0.942 (0.660-1.344)                                                           |
| Huntingdonshire             | 0.990 (0.781-1.253)                                                              | 1.020 (0.939-1.108)                                                            | 1.139 (0.922-1.407)                                                           | 0.937 (0.836-1.051)                                                | 1.053 (0.868-1.278)                                                     | 0.881 (0.507-1.531)                                                           |
| Ipswich                     | 0.979 (0.776-1.233)                                                              | 0.996 (0.878-1.130)                                                            | 1.025 (0.869-1.209)                                                           | 0.954 (0.808-1.126)                                                | 1.057 (0.846-1.319)                                                     | 0.959 (0.609-1.511)                                                           |
| Isle of Wight               | 1.106 (0.862-1.421)                                                              | 1.064 (0.886-1.278)                                                            | 0.978 (0.805-1.188)                                                           | 0.897 (0.728-1.105)                                                | 1.021 (0.686-1.520)                                                     | 0.755 (0.416-1.371)                                                           |
| Isles of Scilly             | 1.190 (0.944-1.500)                                                              | 0.970 (0.789-1.192)                                                            | 0.989 (0.729-1.341)                                                           | 0.909 (0.795-1.040)                                                | 0.904 (0.664-1.232)                                                     | 0.573 (0.288-1.139)                                                           |
| Islington                   | 1.010 (0.630-1.621)                                                              | 1.034 (0.878-1.218)                                                            | 1.191 (0.848-1.673)                                                           | 0.973 (0.835-1.133)                                                | 1.150 (0.886-1.493)                                                     | 1.065 (0.738-1.537)                                                           |
| Kensington & Chelsea        | 0.907 (0.754-1.091)                                                              | 1.009 (0.919-1.107)                                                            | 1.337 (1.002-1.785)                                                           | 0.896 (0.757-1.061)                                                | 1.065 (0.832-1.363)                                                     | 1.013 (0.807-1.272)                                                           |
| King's Lynn & West Norfolk  | 1.076 (0.958-1.209)                                                              | 0.990 (0.912-1.074)                                                            | 0.993 (0.843-1.169)                                                           | 1.014 (0.963-1.068)                                                | 1.159 (0.968-1.388)                                                     | 1.144 (0.801-1.635)                                                           |
| Kingston upon Hull, City of | 1.091 (0.884-1.517)                                                              | 1.038 (0.911-1.182)                                                            | 0.903 (0.691-1.180)                                                           | 0.875 (0.726-1.055)                                                | 1.023 (0.764-1.370)                                                     | 0.621 (0.356-1.086)                                                           |
| Kingston upon Thames        | 0.998 (0.921-1.081)                                                              | 0.972 (0.912-1.037)                                                            | 1.166 (0.979-1.388)                                                           | 0.987 (0.951-1.024)                                                | 1.031 (0.890-1.195)                                                     | 1.031 (0.854-1.245)                                                           |
| Kirklees                    | 1.196 (0.968-1.478)                                                              | 0.984 (0.899-1.078)                                                            | 0.956 (0.768-1.189)                                                           | 1.052 (0.907-1.220)                                                | 1.124 (0.919-1.374)                                                     | 1.131 (0.652-1.963)                                                           |
| Knowsley                    | 1.092 (0.789-1.512)                                                              | 1.076 (0.982-1.179)                                                            | 1.170 (0.982-1.394)                                                           | 0.876 (0.682-1.124)                                                | 0.884 (0.658-1.188)                                                     | 0.708 (0.443-1.132)                                                           |
| Lambeth                     | 1.002 (0.719-1.396)                                                              | 0.982 (0.847-1.138)                                                            | 1.126 (0.769-1.649)                                                           | 1.001 (0.841-1.190)                                                | 1.291 (0.967-1.722)                                                     | 1.071 (0.692-1.657)                                                           |
| Lancaster                   | 0.998 (0.756-1.318)                                                              | 0.998 (0.894-1.114)                                                            | 1.078 (0.927-1.253)                                                           | 0.954 (0.766-1.187)                                                | 1.048 (0.754-1.459)                                                     | 0.888 (0.455-1.731)                                                           |
| Leeds                       | 1.158 (0.840-1.598)                                                              | 0.962 (0.822-1.127)                                                            | 1.010 (0.677-1.508)                                                           | 0.998 (0.847-1.175)                                                | 1.023 (0.746-1.403)                                                     | 0.890 (0.487-1.626)                                                           |
| Leicester                   | 1.183 (0.912-1.534)                                                              | 1.062 (0.967-1.166)                                                            | 0.997 (0.767-1.297)                                                           | 0.937 (0.841-1.043)                                                | 1.027 (0.836-1.261)                                                     | 1.097 (0.706-1.706)                                                           |
| Lewes                       | 1.091 (0.939-1.269)                                                              | 1.019 (0.946-1.097)                                                            | 0.990 (0.877-1.117)                                                           | 0.974 (0.923-1.028)                                                | 1.176 (0.991-1.395)                                                     | 1.088 (0.796-1.487)                                                           |
| Lewisham                    | 0.967 (0.755-1.240)                                                              | 1.012 (0.892-1.148)                                                            | 1.060 (0.766-1.466)                                                           | 0.961 (0.878-1.053)                                                | 1.132 (0.884-1.450)                                                     | 0.933 (0.634-1.372)                                                           |
| Lichfield                   | 1.078 (0.951-1.223)                                                              | 1.031 (0.951-1.117)                                                            | 1.050 (0.912-1.209)                                                           | 0.904 (0.782-1.044)                                                | 1.010 (0.808-1.262)                                                     | 0.891 (0.594-1.336)                                                           |



| <b>Local authority</b>           | <b>Retail &amp; recreation</b><br>(per weekly increase of<br>15% of the baseline<br>visits) | <b>Grocery &amp; pharmacy</b><br>(per weekly increase of<br>5% of the baseline<br>visits) | <b>Transit stations</b><br>(per weekly increase of<br>10% of the baseline<br>visits) | <b>Parks</b><br>(per weekly increase of<br>40% of the baseline<br>visits) | <b>Workplaces</b><br>(per weekly increase of<br>10% of the baseline<br>visits) | <b>Residential</b><br>(per weekly increase of<br>5% of the baseline time<br>length)) |
|----------------------------------|---------------------------------------------------------------------------------------------|-------------------------------------------------------------------------------------------|--------------------------------------------------------------------------------------|---------------------------------------------------------------------------|--------------------------------------------------------------------------------|--------------------------------------------------------------------------------------|
| <b>Lincoln</b>                   | 0.982 (0.861–1.120)                                                                         | 1.004 (0.945–1.067)                                                                       | 0.983 (0.883–1.095)                                                                  | 0.971 (0.924–1.020)                                                       | 1.040 (0.917–1.180)                                                            | 0.880 (0.690–1.123)                                                                  |
| <b>Liverpool</b>                 | 1.186 (0.878–1.602)                                                                         | 1.113 (0.949–1.304)                                                                       | 0.893 (0.483–1.650)                                                                  | 0.979 (0.715–1.340)                                                       | 0.961 (0.668–1.383)                                                            | 0.739 (0.335–1.631)                                                                  |
| <b>Maidstone</b>                 | 1.038 (0.968–1.114)                                                                         | 0.986 (0.920–1.056)                                                                       | 1.012 (0.913–1.121)                                                                  | 0.949 (0.861–1.045)                                                       | 1.039 (0.930–1.161)                                                            | 1.037 (0.828–1.298)                                                                  |
| <b>Maldon</b>                    | 1.046 (0.927–1.180)                                                                         | 1.002 (0.902–1.112)                                                                       | 1.016 (0.870–1.187)                                                                  | 0.978 (0.925–1.035)                                                       | 1.100 (0.916–1.322)                                                            | 1.047 (0.756–1.449)                                                                  |
| <b>Malvern Hills</b>             | 1.055 (0.920–1.209)                                                                         | 1.023 (0.944–1.108)                                                                       | 1.042 (0.907–1.197)                                                                  | 0.964 (0.880–1.055)                                                       | 1.047 (0.911–1.202)                                                            | 0.951 (0.706–1.280)                                                                  |
| <b>Manchester</b>                | 0.922 (0.532–1.598)                                                                         | 1.036 (0.834–1.288)                                                                       | 1.059 (0.473–2.372)                                                                  | 1.006 (0.749–1.351)                                                       | 0.919 (0.566–1.492)                                                            | 0.631 (0.254–1.565)                                                                  |
| <b>Mansfield</b>                 | 1.050 (0.900–1.225)                                                                         | 1.044 (0.959–1.137)                                                                       | 0.950 (0.799–1.128)                                                                  | 0.883 (0.726–1.073)                                                       | 1.082 (0.894–1.311)                                                            | 0.769 (0.539–1.096)                                                                  |
| <b>Medway</b>                    | 1.089 (0.969–1.223)                                                                         | 0.965 (0.890–1.046)                                                                       | 1.023 (0.879–1.190)                                                                  | 0.987 (0.875–1.113)                                                       | 1.106 (0.931–1.313)                                                            | 1.128 (0.836–1.520)                                                                  |
| <b>Mendip</b>                    | 1.069 (0.925–1.236)                                                                         | 1.017 (0.946–1.093)                                                                       | 0.981 (0.903–1.066)                                                                  | 1.032 (0.901–1.181)                                                       | 1.163 (0.970–1.393)                                                            | 1.123 (0.797–1.583)                                                                  |
| <b>Merton</b>                    | 0.949 (0.814–1.105)                                                                         | 1.038 (0.957–1.125)                                                                       | 1.009 (0.785–1.298)                                                                  | 0.930 (0.839–1.030)                                                       | 1.079 (0.889–1.310)                                                            | 0.867 (0.667–1.128)                                                                  |
| <b>Mid Devon</b>                 | 1.025 (0.913–1.151)                                                                         | 0.987 (0.911–1.070)                                                                       | 1.026 (0.951–1.106)                                                                  | 0.941 (0.874–1.013)                                                       | 1.115 (0.979–1.269)                                                            | 0.957 (0.784–1.169)                                                                  |
| <b>Mid Suffolk</b>               | 1.087 (0.931–1.271)                                                                         | 0.992 (0.912–1.079)                                                                       | 1.017 (0.867–1.192)                                                                  | 0.936 (0.818–1.072)                                                       | 1.083 (0.927–1.266)                                                            | 1.058 (0.788–1.422)                                                                  |
| <b>Mid Sussex</b>                | 1.034 (0.882–1.212)                                                                         | 1.043 (0.941–1.156)                                                                       | 1.021 (0.906–1.150)                                                                  | 0.937 (0.830–1.059)                                                       | 1.067 (0.916–1.243)                                                            | 0.916 (0.659–1.273)                                                                  |
| <b>Middlesbrough</b>             | 1.159 (1.008–1.333)                                                                         | 0.975 (0.911–1.044)                                                                       | 1.016 (0.893–1.156)                                                                  | 0.981 (0.917–1.049)                                                       | 1.028 (0.855–1.236)                                                            | 0.950 (0.718–1.258)                                                                  |
| <b>Milton Keynes</b>             | 1.029 (0.867–1.221)                                                                         | 0.987 (0.882–1.104)                                                                       | 1.076 (0.831–1.393)                                                                  | 0.983 (0.852–1.135)                                                       | 1.162 (0.901–1.498)                                                            | 1.035 (0.588–1.824)                                                                  |
| <b>Mole Valley</b>               | 0.973 (0.844–1.122)                                                                         | 1.054 (0.967–1.150)                                                                       | 1.005 (0.893–1.130)                                                                  | 0.927 (0.733–1.171)                                                       | 1.187 (1.011–1.394)                                                            | 0.924 (0.718–1.189)                                                                  |
| <b>Monmouthshire</b>             | 1.085 (0.970–1.214)                                                                         | 1.000 (0.938–1.066)                                                                       | 0.962 (0.877–1.056)                                                                  | 1.012 (0.909–1.126)                                                       | 1.040 (0.920–1.176)                                                            | 1.058 (0.924–1.211)                                                                  |
| <b>Moray</b>                     | 1.284 (0.888–1.857)                                                                         | 1.001 (0.878–1.142)                                                                       | 1.014 (0.762–1.350)                                                                  | 0.948 (0.784–1.145)                                                       | 0.935 (0.662–1.320)                                                            | 0.872 (0.452–1.682)                                                                  |
| <b>Neath Port Talbot</b>         | 1.144 (0.895–1.463)                                                                         | 0.970 (0.896–1.049)                                                                       | 1.050 (0.894–1.232)                                                                  | 0.961 (0.892–1.036)                                                       | 1.082 (0.884–1.325)                                                            | 1.055 (0.735–1.514)                                                                  |
| <b>New Forest</b>                | 1.036 (0.923–1.162)                                                                         | 1.099 (0.981–1.232)                                                                       | 0.995 (0.888–1.115)                                                                  | 0.906 (0.764–1.076)                                                       | 1.062 (0.827–1.363)                                                            | 0.887 (0.536–1.469)                                                                  |
| <b>Newark &amp; Sherwood</b>     | 1.022 (0.932–1.122)                                                                         | 1.037 (0.982–1.095)                                                                       | 0.985 (0.913–1.062)                                                                  | 0.979 (0.875–1.094)                                                       | 1.040 (0.896–1.207)                                                            | 0.866 (0.673–1.115)                                                                  |
| <b>Newcastle-under-Lyme</b>      | 1.247 (0.837–1.859)                                                                         | 1.116 (0.891–1.396)                                                                       | 0.798 (0.546–1.167)                                                                  | 1.122 (0.950–1.327)                                                       | 0.758 (0.476–1.206)                                                            | 0.570 (0.238–1.362)                                                                  |
| <b>Newcastle upon Tyne</b>       | 1.071 (0.832–1.379)                                                                         | 0.982 (0.903–1.067)                                                                       | 1.218 (0.889–1.669)                                                                  | 0.982 (0.901–1.072)                                                       | 1.139 (0.940–1.380)                                                            | 1.193 (0.827–1.722)                                                                  |
| <b>Newham</b>                    | 0.994 (0.843–1.173)                                                                         | 0.989 (0.895–1.092)                                                                       | 1.052 (0.793–1.396)                                                                  | 0.971 (0.921–1.023)                                                       | 1.088 (0.897–1.320)                                                            | 0.962 (0.709–1.307)                                                                  |
| <b>Newport</b>                   | 1.291 (0.930–1.791)                                                                         | 0.963 (0.865–1.072)                                                                       | 0.909 (0.791–1.045)                                                                  | 1.036 (0.871–1.233)                                                       | 1.011 (0.787–1.300)                                                            | 0.992 (0.657–1.498)                                                                  |
| <b>Newry, Mourne &amp; Down</b>  | 1.106 (0.931–1.314)                                                                         | 1.001 (0.922–1.087)                                                                       | 1.003 (0.820–1.226)                                                                  | 1.002 (0.889–1.129)                                                       | 0.951 (0.704–1.285)                                                            | 0.903 (0.499–1.635)                                                                  |
| <b>North Devon</b>               | 1.033 (0.898–1.190)                                                                         | 1.011 (0.928–1.102)                                                                       | 0.986 (0.868–1.120)                                                                  | 0.996 (0.946–1.048)                                                       | 1.089 (0.905–1.310)                                                            | 0.948 (0.668–1.345)                                                                  |
| <b>North East Derbyshire</b>     | 0.997 (0.877–1.132)                                                                         | 1.043 (0.970–1.121)                                                                       | 0.989 (0.932–1.049)                                                                  | 0.955 (0.798–1.144)                                                       | 0.984 (0.804–1.206)                                                            | 0.762 (0.497–1.168)                                                                  |
| <b>North East Lincolnshire</b>   | 1.053 (0.908–1.222)                                                                         | 1.019 (0.943–1.101)                                                                       | 0.969 (0.885–1.061)                                                                  | 0.967 (0.893–1.046)                                                       | 1.109 (0.904–1.361)                                                            | 0.802 (0.553–1.164)                                                                  |
| <b>North Hertfordshire</b>       | 1.059 (0.886–1.266)                                                                         | 1.010 (0.930–1.098)                                                                       | 1.006 (0.875–1.158)                                                                  | 0.952 (0.846–1.071)                                                       | 1.076 (0.889–1.301)                                                            | 0.974 (0.673–1.410)                                                                  |
| <b>North Kesteven</b>            | 1.048 (0.956–1.148)                                                                         | 1.004 (0.965–1.046)                                                                       | 0.986 (0.948–1.025)                                                                  | 0.928 (0.813–1.060)                                                       | 1.072 (0.977–1.177)                                                            | 0.947 (0.776–1.155)                                                                  |
| <b>North Lincolnshire</b>        | 1.123 (0.951–1.325)                                                                         | 0.988 (0.937–1.043)                                                                       | 1.001 (0.933–1.074)                                                                  | 0.950 (0.825–1.093)                                                       | 1.000 (0.894–1.118)                                                            | 0.863 (0.656–1.136)                                                                  |
| <b>North Norfolk</b>             | 1.014 (0.928–1.106)                                                                         | 1.019 (0.955–1.087)                                                                       | 0.968 (0.914–1.025)                                                                  | 1.004 (0.943–1.068)                                                       | 1.127 (0.933–1.361)                                                            | 1.123 (0.803–1.569)                                                                  |
| <b>North Somerset</b>            | 1.122 (0.946–1.332)                                                                         | 1.013 (0.922–1.113)                                                                       | 1.066 (0.940–1.209)                                                                  | 0.954 (0.872–1.043)                                                       | 1.182 (0.973–1.436)                                                            | 1.047 (0.739–1.483)                                                                  |
| <b>North Tyneside</b>            | 1.098 (0.912–1.322)                                                                         | 1.001 (0.905–1.107)                                                                       | 0.991 (0.816–1.202)                                                                  | 0.919 (0.793–1.066)                                                       | 0.929 (0.763–1.130)                                                            | 0.723 (0.456–1.144)                                                                  |
| <b>North Warwickshire</b>        | 1.034 (0.921–1.162)                                                                         | 0.981 (0.929–1.036)                                                                       | 1.051 (0.974–1.134)                                                                  | 0.926 (0.812–1.056)                                                       | 1.134 (0.957–1.343)                                                            | 0.905 (0.698–1.173)                                                                  |
| <b>North West Leicestershire</b> | 1.037 (0.854–1.260)                                                                         | 1.060 (0.968–1.161)                                                                       | 1.023 (0.851–1.230)                                                                  | 0.900 (0.748–1.083)                                                       | 0.938 (0.814–1.080)                                                            | 0.770 (0.554–1.071)                                                                  |
| <b>Northampton</b>               | 1.032 (0.836–1.274)                                                                         | 1.083 (0.953–1.230)                                                                       | 1.036 (0.778–1.380)                                                                  | 0.951 (0.777–1.164)                                                       | 1.129 (0.902–1.412)                                                            | 0.991 (0.694–1.415)                                                                  |
| <b>Northumberland</b>            | 1.131 (0.961–1.332)                                                                         | 1.000 (0.915–1.092)                                                                       | 1.026 (0.894–1.177)                                                                  | 0.937 (0.856–1.026)                                                       | 0.853 (0.673–1.081)                                                            | 0.739 (0.452–1.209)                                                                  |
| <b>Norwich</b>                   | 1.052 (0.872–1.269)                                                                         | 0.984 (0.902–1.075)                                                                       | 0.997 (0.773–1.286)                                                                  | 0.988 (0.898–1.087)                                                       | 1.115 (0.914–1.360)                                                            | 1.060 (0.777–1.446)                                                                  |
| <b>Nottingham</b>                | 1.479 (0.754–2.904)                                                                         | 1.165 (0.777–1.747)                                                                       | 0.713 (0.232–2.189)                                                                  | 1.107 (0.774–1.582)                                                       | 0.971 (0.448–2.104)                                                            | 1.119 (0.245–5.105)                                                                  |
| <b>Oldham</b>                    | 0.998 (0.773–1.289)                                                                         | 1.092 (0.961–1.241)                                                                       | 1.053 (0.841–1.317)                                                                  | 0.922 (0.834–1.020)                                                       | 0.993 (0.785–1.258)                                                            | 0.754 (0.436–1.305)                                                                  |

| Local authority                    | Retail & recreation<br>(per weekly increase of<br>15% of the baseline<br>visits) | Grocery & pharmacy<br>(per weekly increase of<br>5% of the baseline<br>visits) | Transit stations<br>(per weekly increase of<br>10% of the baseline<br>visits) | Parks<br>(per weekly increase of<br>40% of the baseline<br>visits) | Workplaces<br>(per weekly increase of<br>10% of the baseline<br>visits) | Residential<br>(per weekly increase of<br>5% of the baseline time<br>length)) |
|------------------------------------|----------------------------------------------------------------------------------|--------------------------------------------------------------------------------|-------------------------------------------------------------------------------|--------------------------------------------------------------------|-------------------------------------------------------------------------|-------------------------------------------------------------------------------|
| <b>Oxford</b>                      | 1.108 (0.891-1.377)                                                              | 0.978 (0.893-1.071)                                                            | 1.068 (0.758-1.506)                                                           | 1.050 (0.892-1.235)                                                | 1.087 (0.920-1.286)                                                     | 1.152 (0.812-1.635)                                                           |
| <b>Pembrokeshire</b>               | 1.040 (0.862-1.255)                                                              | 0.976 (0.903-1.055)                                                            | 1.005 (0.904-1.117)                                                           | 1.007 (0.917-1.105)                                                | 1.032 (0.945-1.127)                                                     | 1.013 (0.720-1.427)                                                           |
| <b>Pendle</b>                      | 1.036 (0.897-1.196)                                                              | 1.072 (0.992-1.158)                                                            | 0.967 (0.914-1.022)                                                           | 0.962 (0.898-1.029)                                                | 1.046 (0.903-1.211)                                                     | 0.898 (0.648-1.244)                                                           |
| <b>Perth &amp; Kinross</b>         | 1.124 (0.858-1.472)                                                              | 1.060 (0.920-1.222)                                                            | 0.942 (0.807-1.099)                                                           | 0.995 (0.835-1.186)                                                | 1.003 (0.824-1.221)                                                     | 0.925 (0.609-1.404)                                                           |
| <b>Plymouth</b>                    | 1.164 (0.877-1.547)                                                              | 1.115 (0.962-1.291)                                                            | 0.839 (0.671-1.049)                                                           | 1.039 (0.843-1.280)                                                | 1.106 (0.876-1.396)                                                     | 0.779 (0.415-1.462)                                                           |
| <b>Portsmouth</b>                  | 1.205 (0.960-1.513)                                                              | 1.019 (0.911-1.141)                                                            | 0.889 (0.698-1.131)                                                           | 1.016 (0.896-1.152)                                                | 1.193 (0.904-1.575)                                                     | 1.018 (0.550-1.884)                                                           |
| <b>Powys</b>                       | 0.993 (0.929-1.063)                                                              | 1.010 (0.962-1.060)                                                            | 0.994 (0.912-1.083)                                                           | 0.984 (0.895-1.082)                                                | 1.020 (0.941-1.106)                                                     | 0.934 (0.791-1.102)                                                           |
| <b>Preston</b>                     | 0.992 (0.874-1.126)                                                              | 1.028 (0.964-1.097)                                                            | 1.031 (0.845-1.257)                                                           | 0.972 (0.901-1.048)                                                | 1.031 (0.896-1.186)                                                     | 0.795 (0.553-1.143)                                                           |
| <b>Reading</b>                     | 0.952 (0.775-1.170)                                                              | 1.019 (0.935-1.111)                                                            | 1.088 (0.759-1.559)                                                           | 0.979 (0.923-1.037)                                                | 1.127 (0.919-1.382)                                                     | 1.002 (0.734-1.367)                                                           |
| <b>Redbridge</b>                   | 1.106 (0.942-1.298)                                                              | 0.986 (0.900-1.081)                                                            | 0.933 (0.647-1.346)                                                           | 0.973 (0.892-1.061)                                                | 1.090 (0.932-1.276)                                                     | 0.959 (0.650-1.417)                                                           |
| <b>Redcar &amp; Cleveland</b>      | 1.134 (0.946-1.358)                                                              | 1.073 (0.961-1.198)                                                            | 0.906 (0.759-1.082)                                                           | 0.992 (0.899-1.094)                                                | 1.054 (0.868-1.279)                                                     | 0.785 (0.492-1.254)                                                           |
| <b>Redditch</b>                    | 1.097 (0.946-1.272)                                                              | 1.021 (0.919-1.134)                                                            | 1.105 (0.912-1.339)                                                           | 0.968 (0.897-1.045)                                                | 1.012 (0.824-1.244)                                                     | 0.879 (0.633-1.221)                                                           |
| <b>Reigate &amp; Banstead</b>      | 1.056 (0.864-1.292)                                                              | 0.947 (0.862-1.041)                                                            | 1.133 (0.870-1.477)                                                           | 0.903 (0.798-1.021)                                                | 1.076 (0.901-1.286)                                                     | 1.002 (0.692-1.450)                                                           |
| <b>Rhondda Cynon Taf</b>           | 1.280 (0.967-1.695)                                                              | 0.926 (0.783-1.096)                                                            | 1.100 (0.673-1.799)                                                           | 0.978 (0.823-1.162)                                                | 0.989 (0.701-1.397)                                                     | 1.017 (0.545-1.896)                                                           |
| <b>Ribble Valley</b>               | 1.066 (0.911-1.249)                                                              | 1.020 (0.959-1.085)                                                            | 1.036 (0.892-1.204)                                                           | 0.978 (0.907-1.053)                                                | 1.048 (0.899-1.222)                                                     | 0.984 (0.723-1.339)                                                           |
| <b>Richmond upon Thames</b>        | 0.982 (0.803-1.200)                                                              | 0.918 (0.830-1.015)                                                            | 1.155 (0.897-1.487)                                                           | 0.967 (0.867-1.078)                                                | 1.031 (0.935-1.137)                                                     | 0.928 (0.642-1.340)                                                           |
| <b>Richmondshire</b>               | 1.087 (0.976-1.211)                                                              | 1.019 (0.937-1.108)                                                            | 1.025 (0.961-1.094)                                                           | 0.930 (0.826-1.047)                                                | 1.041 (0.894-1.211)                                                     | 0.955 (0.763-1.195)                                                           |
| <b>Rochdale</b>                    | 1.065 (0.897-1.266)                                                              | 1.045 (0.975-1.121)                                                            | 0.996 (0.871-1.139)                                                           | 0.968 (0.898-1.044)                                                | 0.999 (0.892-1.119)                                                     | 0.845 (0.587-1.216)                                                           |
| <b>Rother</b>                      | 1.050 (0.971-1.134)                                                              | 0.978 (0.920-1.039)                                                            | 0.992 (0.881-1.117)                                                           | 1.005 (0.880-1.147)                                                | 1.097 (0.966-1.247)                                                     | 1.108 (0.870-1.411)                                                           |
| <b>Rotherham</b>                   | 1.017 (0.871-1.188)                                                              | 1.012 (0.938-1.091)                                                            | 1.022 (0.902-1.159)                                                           | 0.906 (0.781-1.052)                                                | 0.982 (0.799-1.207)                                                     | 0.859 (0.584-1.263)                                                           |
| <b>Rugby</b>                       | 1.106 (0.947-1.292)                                                              | 0.993 (0.920-1.072)                                                            | 1.072 (0.925-1.241)                                                           | 0.962 (0.878-1.054)                                                | 1.008 (0.892-1.139)                                                     | 0.957 (0.707-1.296)                                                           |
| <b>Runnymede</b>                   | 1.023 (0.938-1.116)                                                              | 1.023 (0.967-1.081)                                                            | 0.994 (0.922-1.072)                                                           | 0.992 (0.947-1.040)                                                | 1.082 (0.950-1.232)                                                     | 0.987 (0.867-1.125)                                                           |
| <b>Rushcliffe</b>                  | 1.013 (0.868-1.182)                                                              | 1.023 (0.947-1.106)                                                            | 0.960 (0.881-1.046)                                                           | 0.943 (0.843-1.055)                                                | 1.131 (0.918-1.394)                                                     | 0.796 (0.547-1.159)                                                           |
| <b>Rushmoor</b>                    | 0.935 (0.673-1.298)                                                              | 1.066 (0.923-1.232)                                                            | 1.123 (0.940-1.340)                                                           | 0.971 (0.900-1.046)                                                | 1.187 (0.946-1.490)                                                     | 0.977 (0.652-1.465)                                                           |
| <b>Ryedale</b>                     | 1.044 (0.962-1.133)                                                              | 1.013 (0.931-1.102)                                                            | 1.010 (0.906-1.126)                                                           | 0.943 (0.802-1.108)                                                | 1.093 (0.903-1.324)                                                     | 0.938 (0.678-1.298)                                                           |
| <b>Salford</b>                     | 1.116 (0.870-1.431)                                                              | 1.040 (0.953-1.135)                                                            | 0.980 (0.843-1.139)                                                           | 0.984 (0.873-1.108)                                                | 1.175 (0.923-1.495)                                                     | 0.888 (0.626-1.259)                                                           |
| <b>Sandwell</b>                    | 1.197 (0.961-1.491)                                                              | 1.030 (0.941-1.129)                                                            | 1.180 (0.901-1.546)                                                           | 0.969 (0.844-1.114)                                                | 1.091 (0.908-1.311)                                                     | 1.107 (0.644-1.900)                                                           |
| <b>Scarborough</b>                 | 1.212 (1.000-1.468)                                                              | 1.096 (0.953-1.261)                                                            | 0.905 (0.761-1.075)                                                           | 0.917 (0.827-1.017)                                                | 0.987 (0.723-1.348)                                                     | 0.882 (0.460-1.693)                                                           |
| <b>Scottish Borders</b>            | 1.167 (0.896-1.521)                                                              | 1.043 (0.912-1.192)                                                            | 0.986 (0.815-1.192)                                                           | 0.933 (0.711-1.224)                                                | 0.916 (0.757-1.108)                                                     | 0.812 (0.521-1.267)                                                           |
| <b>Sedgemoor</b>                   | 1.126 (0.980-1.295)                                                              | 1.019 (0.939-1.106)                                                            | 0.990 (0.932-1.052)                                                           | 0.974 (0.902-1.052)                                                | 1.233 (0.973-1.561)                                                     | 1.073 (0.749-1.539)                                                           |
| <b>Sefton</b>                      | 1.080 (0.821-1.422)                                                              | 1.102 (0.930-1.307)                                                            | 0.875 (0.647-1.184)                                                           | 0.961 (0.844-1.094)                                                | 0.852 (0.603-1.205)                                                     | 0.548 (0.243-1.239)                                                           |
| <b>Selby</b>                       | 1.186 (0.968-1.453)                                                              | 1.022 (0.955-1.093)                                                            | 0.992 (0.913-1.077)                                                           | 0.897 (0.724-1.112)                                                | 1.072 (0.850-1.352)                                                     | 1.049 (0.673-1.635)                                                           |
| <b>Sevenoaks</b>                   | 1.089 (0.950-1.248)                                                              | 0.979 (0.902-1.062)                                                            | 1.078 (0.944-1.232)                                                           | 0.895 (0.795-1.008)                                                | 1.036 (0.878-1.223)                                                     | 1.021 (0.813-1.281)                                                           |
| <b>Sheffield</b>                   | 1.179 (0.905-1.535)                                                              | 0.932 (0.806-1.078)                                                            | 0.979 (0.757-1.267)                                                           | 1.041 (0.871-1.244)                                                | 1.149 (0.828-1.594)                                                     | 1.080 (0.589-1.980)                                                           |
| <b>Shropshire</b>                  | 1.116 (0.857-1.453)                                                              | 1.051 (0.920-1.201)                                                            | 1.045 (0.873-1.252)                                                           | 1.023 (0.802-1.305)                                                | 1.074 (0.765-1.508)                                                     | 1.041 (0.506-2.144)                                                           |
| <b>Slough</b>                      | 1.112 (0.949-1.303)                                                              | 1.033 (0.950-1.124)                                                            | 0.988 (0.847-1.154)                                                           | 0.974 (0.903-1.050)                                                | 1.055 (0.917-1.213)                                                     | 0.958 (0.739-1.243)                                                           |
| <b>Solihull</b>                    | 1.028 (0.885-1.196)                                                              | 1.019 (0.954-1.089)                                                            | 1.226 (0.948-1.584)                                                           | 0.965 (0.886-1.050)                                                | 1.018 (0.880-1.177)                                                     | 0.968 (0.680-1.378)                                                           |
| <b>Somerset West &amp; Taunton</b> | 1.055 (0.885-1.257)                                                              | 0.992 (0.893-1.101)                                                            | 1.001 (0.940-1.065)                                                           | 0.964 (0.841-1.105)                                                | 1.063 (0.867-1.302)                                                     | 0.889 (0.576-1.370)                                                           |
| <b>South Bucks</b>                 | 1.053 (0.917-1.208)                                                              | 0.982 (0.927-1.040)                                                            | 1.003 (0.878-1.147)                                                           | 0.858 (0.717-1.027)                                                | 1.039 (0.882-1.222)                                                     | 0.865 (0.677-1.103)                                                           |
| <b>South Cambridgeshire</b>        | 1.016 (0.883-1.169)                                                              | 0.985 (0.912-1.063)                                                            | 1.050 (0.933-1.182)                                                           | 0.908 (0.791-1.043)                                                | 1.050 (0.892-1.237)                                                     | 0.938 (0.666-1.322)                                                           |
| <b>South Derbyshire</b>            | 1.103 (0.932-1.306)                                                              | 1.051 (0.966-1.143)                                                            | 1.037 (0.938-1.146)                                                           | 0.875 (0.741-1.032)                                                | 1.093 (0.877-1.363)                                                     | 0.902 (0.580-1.404)                                                           |
| <b>South Gloucestershire</b>       | 1.058 (0.855-1.309)                                                              | 1.048 (0.967-1.135)                                                            | 0.954 (0.857-1.061)                                                           | 0.978 (0.868-1.101)                                                | 1.210 (1.006-1.455)                                                     | 0.849 (0.590-1.222)                                                           |

| Local authority         | Retail & recreation<br>(per weekly increase of<br>15% of the baseline<br>visits) | Grocery & pharmacy<br>(per weekly increase of<br>5% of the baseline<br>visits) | Transit stations<br>(per weekly increase of<br>10% of the baseline<br>visits) | Parks<br>(per weekly increase of<br>40% of the baseline<br>visits) | Workplaces<br>(per weekly increase of<br>10% of the baseline<br>visits) | Residential<br>(per weekly increase of<br>5% of the baseline time<br>length)) |
|-------------------------|----------------------------------------------------------------------------------|--------------------------------------------------------------------------------|-------------------------------------------------------------------------------|--------------------------------------------------------------------|-------------------------------------------------------------------------|-------------------------------------------------------------------------------|
| South Hams              | 1.026 (0.912-1.155)                                                              | 1.049 (0.964-1.141)                                                            | 0.970 (0.884-1.066)                                                           | 1.000 (0.881-1.136)                                                | 1.195 (0.939-1.522)                                                     | 0.965 (0.644-1.446)                                                           |
| South Holland           | 1.083 (0.960-1.222)                                                              | 0.985 (0.924-1.051)                                                            | 1.005 (0.916-1.102)                                                           | 0.954 (0.819-1.111)                                                | 1.048 (0.903-1.216)                                                     | 0.962 (0.718-1.290)                                                           |
| South Kesteven          | 1.084 (0.942-1.247)                                                              | 1.002 (0.937-1.071)                                                            | 1.003 (0.944-1.064)                                                           | 0.990 (0.926-1.059)                                                | 1.071 (0.931-1.232)                                                     | 1.039 (0.756-1.427)                                                           |
| South Lakeland          | 1.050 (0.959-1.150)                                                              | 1.004 (0.951-1.061)                                                            | 1.043 (0.965-1.127)                                                           | 0.919 (0.798-1.057)                                                | 1.041 (0.875-1.239)                                                     | 1.011 (0.759-1.349)                                                           |
| South Lanarkshire       | 1.133 (0.948-1.354)                                                              | 1.011 (0.897-1.139)                                                            | 0.983 (0.796-1.215)                                                           | 0.971 (0.883-1.069)                                                | 0.900 (0.751-1.079)                                                     | 0.745 (0.458-1.210)                                                           |
| South Norfolk           | 1.183 (0.998-1.401)                                                              | 1.013 (0.940-1.091)                                                            | 1.008 (0.918-1.107)                                                           | 0.919 (0.769-1.098)                                                | 1.112 (0.878-1.409)                                                     | 1.092 (0.714-1.672)                                                           |
| South Northamptonshire  | 1.065 (0.924-1.227)                                                              | 0.975 (0.917-1.036)                                                            | 1.040 (0.931-1.162)                                                           | 0.917 (0.814-1.033)                                                | 1.092 (0.923-1.291)                                                     | 0.882 (0.648-1.200)                                                           |
| South Oxfordshire       | 0.944 (0.755-1.180)                                                              | 1.055 (0.929-1.199)                                                            | 1.054 (0.803-1.383)                                                           | 0.908 (0.788-1.047)                                                | 1.048 (0.842-1.303)                                                     | 0.767 (0.410-1.435)                                                           |
| South Ribble            | 0.944 (0.813-1.096)                                                              | 1.057 (0.989-1.130)                                                            | 0.951 (0.835-1.082)                                                           | 0.985 (0.916-1.060)                                                | 0.994 (0.855-1.155)                                                     | 0.706 (0.489-1.020)                                                           |
| South Somerset          | 1.123 (0.933-1.353)                                                              | 0.992 (0.911-1.081)                                                            | 0.968 (0.883-1.062)                                                           | 1.032 (0.894-1.192)                                                | 1.104 (0.927-1.316)                                                     | 1.036 (0.653-1.645)                                                           |
| South Staffordshire     | 1.084 (0.954-1.232)                                                              | 1.022 (0.945-1.106)                                                            | 1.047 (0.949-1.156)                                                           | 0.927 (0.817-1.051)                                                | 1.062 (0.888-1.272)                                                     | 0.917 (0.605-1.392)                                                           |
| South Tyneside          | 1.132 (0.866-1.478)                                                              | 1.004 (0.890-1.131)                                                            | 1.011 (0.870-1.175)                                                           | 0.924 (0.846-1.010)                                                | 0.895 (0.728-1.101)                                                     | 0.760 (0.421-1.370)                                                           |
| Southampton             | 1.097 (0.882-1.365)                                                              | 1.021 (0.908-1.148)                                                            | 0.964 (0.718-1.295)                                                           | 0.972 (0.775-1.219)                                                | 1.182 (0.923-1.514)                                                     | 0.824 (0.489-1.388)                                                           |
| Southend-on-Sea         | 1.048 (0.906-1.212)                                                              | 0.978 (0.882-1.085)                                                            | 1.054 (0.871-1.275)                                                           | 0.975 (0.936-1.015)                                                | 1.150 (0.963-1.373)                                                     | 1.096 (0.794-1.513)                                                           |
| Southwark               | 0.916 (0.633-1.325)                                                              | 0.978 (0.836-1.144)                                                            | 1.266 (0.854-1.877)                                                           | 0.983 (0.772-1.253)                                                | 1.146 (0.875-1.500)                                                     | 1.045 (0.676-1.614)                                                           |
| Spelthorne              | 1.047 (0.914-1.199)                                                              | 1.002 (0.917-1.095)                                                            | 1.019 (0.874-1.188)                                                           | 0.968 (0.894-1.047)                                                | 1.088 (0.904-1.310)                                                     | 0.938 (0.705-1.249)                                                           |
| St Albans               | 1.114 (0.891-1.393)                                                              | 0.988 (0.909-1.074)                                                            | 0.883 (0.694-1.123)                                                           | 0.974 (0.873-1.086)                                                | 1.151 (0.941-1.408)                                                     | 1.008 (0.725-1.402)                                                           |
| Stafford                | 1.017 (0.894-1.157)                                                              | 1.043 (0.974-1.118)                                                            | 0.984 (0.881-1.098)                                                           | 0.926 (0.807-1.063)                                                | 0.979 (0.815-1.175)                                                     | 0.777 (0.518-1.165)                                                           |
| Staffordshire Moorlands | 1.002 (0.936-1.074)                                                              | 1.029 (0.967-1.096)                                                            | 0.990 (0.952-1.029)                                                           | 1.011 (0.944-1.084)                                                | 0.992 (0.854-1.151)                                                     | 0.855 (0.662-1.105)                                                           |
| Stevenage               | 1.006 (0.880-1.150)                                                              | 1.007 (0.931-1.089)                                                            | 1.015 (0.852-1.209)                                                           | 0.970 (0.921-1.021)                                                | 1.169 (0.986-1.387)                                                     | 0.930 (0.721-1.200)                                                           |
| Stirling                | 0.930 (0.769-1.126)                                                              | 1.040 (0.974-1.111)                                                            | 1.090 (0.918-1.295)                                                           | 1.004 (0.919-1.096)                                                | 1.019 (0.888-1.170)                                                     | 1.013 (0.775-1.324)                                                           |
| Stockport               | 0.999 (0.849-1.176)                                                              | 1.086 (1.007-1.172)                                                            | 1.006 (0.814-1.244)                                                           | 0.926 (0.806-1.064)                                                | 1.033 (0.855-1.247)                                                     | 0.761 (0.506-1.145)                                                           |
| Stockton-on-Tees        | 1.104 (0.942-1.295)                                                              | 0.994 (0.929-1.065)                                                            | 1.013 (0.928-1.106)                                                           | 0.919 (0.824-1.024)                                                | 0.977 (0.838-1.138)                                                     | 0.866 (0.649-1.154)                                                           |
| Stoke-on-Trent          | 1.067 (0.929-1.224)                                                              | 0.987 (0.912-1.067)                                                            | 1.032 (0.906-1.176)                                                           | 0.951 (0.875-1.032)                                                | 1.051 (0.888-1.243)                                                     | 0.945 (0.697-1.282)                                                           |
| Stratford-on-Avon       | 1.043 (0.924-1.177)                                                              | 1.009 (0.942-1.080)                                                            | 1.059 (0.945-1.187)                                                           | 0.952 (0.837-1.082)                                                | 1.109 (0.924-1.332)                                                     | 1.013 (0.739-1.389)                                                           |
| Stroud                  | 1.071 (0.874-1.312)                                                              | 0.989 (0.939-1.041)                                                            | 1.026 (0.956-1.100)                                                           | 0.912 (0.793-1.050)                                                | 1.074 (0.940-1.228)                                                     | 0.904 (0.650-1.257)                                                           |
| Sunderland              | 1.005 (0.761-1.327)                                                              | 1.080 (0.957-1.219)                                                            | 0.908 (0.771-1.069)                                                           | 0.905 (0.792-1.034)                                                | 0.921 (0.743-1.142)                                                     | 0.577 (0.337-0.987)                                                           |
| Sutton                  | 1.043 (0.909-1.197)                                                              | 1.009 (0.920-1.106)                                                            | 1.014 (0.766-1.343)                                                           | 0.939 (0.853-1.033)                                                | 1.059 (0.870-1.289)                                                     | 0.933 (0.666-1.308)                                                           |
| Swale                   | 1.104 (0.988-1.233)                                                              | 1.005 (0.946-1.068)                                                            | 0.995 (0.898-1.101)                                                           | 0.971 (0.877-1.075)                                                | 1.038 (0.900-1.197)                                                     | 1.052 (0.801-1.383)                                                           |
| Swansea                 | 1.163 (0.872-1.552)                                                              | 0.948 (0.840-1.070)                                                            | 0.889 (0.669-1.182)                                                           | 0.998 (0.912-1.091)                                                | 1.097 (0.859-1.401)                                                     | 0.774 (0.449-1.334)                                                           |
| Tameside                | 1.057 (0.840-1.330)                                                              | 1.058 (0.947-1.182)                                                            | 0.984 (0.820-1.181)                                                           | 0.942 (0.817-1.087)                                                | 1.045 (0.853-1.281)                                                     | 0.753 (0.478-1.188)                                                           |
| Tandridge               | 1.038 (0.906-1.190)                                                              | 1.013 (0.942-1.089)                                                            | 1.028 (0.892-1.184)                                                           | 0.962 (0.845-1.095)                                                | 1.089 (0.966-1.228)                                                     | 1.022 (0.839-1.245)                                                           |
| Teignbridge             | 1.011 (0.868-1.177)                                                              | 1.043 (0.957-1.137)                                                            | 0.957 (0.860-1.066)                                                           | 1.041 (0.909-1.192)                                                | 1.183 (0.956-1.466)                                                     | 0.999 (0.676-1.477)                                                           |
| Telford & Wrekin        | 1.113 (0.912-1.358)                                                              | 1.026 (0.941-1.119)                                                            | 1.028 (0.959-1.103)                                                           | 1.024 (0.893-1.174)                                                | 1.067 (0.847-1.344)                                                     | 1.030 (0.605-1.753)                                                           |
| Tendring                | 1.033 (0.784-1.361)                                                              | 1.088 (0.961-1.231)                                                            | 0.959 (0.833-1.105)                                                           | 0.918 (0.760-1.110)                                                | 0.942 (0.644-1.378)                                                     | 0.803 (0.386-1.673)                                                           |
| Test Valley             | 1.064 (0.826-1.371)                                                              | 1.006 (0.886-1.141)                                                            | 1.003 (0.916-1.098)                                                           | 0.957 (0.786-1.166)                                                | 1.076 (0.867-1.335)                                                     | 0.921 (0.533-1.594)                                                           |
| Twesbury                | 1.075 (0.936-1.235)                                                              | 1.018 (0.943-1.098)                                                            | 0.998 (0.927-1.075)                                                           | 0.984 (0.928-1.043)                                                | 1.071 (0.918-1.250)                                                     | 0.940 (0.724-1.221)                                                           |
| Thanet                  | 1.135 (0.982-1.310)                                                              | 1.035 (0.952-1.126)                                                            | 0.968 (0.879-1.065)                                                           | 0.986 (0.935-1.039)                                                | 1.180 (0.974-1.431)                                                     | 1.225 (0.827-1.815)                                                           |
| Three Rivers            | 1.025 (0.924-1.138)                                                              | 0.965 (0.911-1.022)                                                            | 0.988 (0.857-1.140)                                                           | 1.048 (0.776-1.415)                                                | 1.077 (0.916-1.265)                                                     | 0.930 (0.753-1.150)                                                           |
| Thurrock                | 1.075 (0.926-1.248)                                                              | 0.935 (0.779-1.123)                                                            | 0.974 (0.783-1.212)                                                           | 1.019 (0.884-1.176)                                                | 1.214 (0.921-1.601)                                                     | 1.004 (0.650-1.552)                                                           |
| Tonbridge & Malling     | 1.065 (0.948-1.196)                                                              | 0.983 (0.915-1.055)                                                            | 1.024 (0.911-1.150)                                                           | 0.928 (0.810-1.063)                                                | 1.085 (0.936-1.257)                                                     | 1.048 (0.819-1.342)                                                           |
| Torbay                  | 1.039 (0.905-1.193)                                                              | 1.058 (0.955-1.172)                                                            | 0.983 (0.881-1.098)                                                           | 0.927 (0.813-1.057)                                                | 1.117 (0.907-1.376)                                                     | 0.806 (0.513-1.267)                                                           |

| <b>Local authority</b>          | <b>Retail &amp; recreation</b><br>(per weekly increase of<br>15% of the baseline<br>visits) | <b>Grocery &amp; pharmacy</b><br>(per weekly increase of<br>5% of the baseline<br>visits) | <b>Transit stations</b><br>(per weekly increase of<br>10% of the baseline<br>visits) | <b>Parks</b><br>(per weekly increase of<br>40% of the baseline<br>visits) | <b>Workplaces</b><br>(per weekly increase of<br>10% of the baseline<br>visits) | <b>Residential</b><br>(per weekly increase of<br>5% of the baseline time<br>length)) |
|---------------------------------|---------------------------------------------------------------------------------------------|-------------------------------------------------------------------------------------------|--------------------------------------------------------------------------------------|---------------------------------------------------------------------------|--------------------------------------------------------------------------------|--------------------------------------------------------------------------------------|
| <b>Torridge</b>                 | 1.053 (0.969–1.145)                                                                         | 0.990 (0.929–1.056)                                                                       | 0.995 (0.963–1.028)                                                                  | 0.977 (0.873–1.094)                                                       | 1.024 (0.868–1.209)                                                            | 0.859 (0.649–1.138)                                                                  |
| <b>Tower Hamlets</b>            | 1.108 (0.836–1.469)                                                                         | 1.001 (0.882–1.135)                                                                       | 1.102 (0.848–1.431)                                                                  | 0.945 (0.779–1.145)                                                       | 1.101 (0.872–1.389)                                                            | 1.020 (0.731–1.424)                                                                  |
| <b>Trafford</b>                 | 1.089 (0.966–1.228)                                                                         | 1.048 (0.943–1.165)                                                                       | 1.017 (0.824–1.256)                                                                  | 0.965 (0.818–1.139)                                                       | 1.066 (0.855–1.329)                                                            | 0.841 (0.542–1.303)                                                                  |
| <b>Tunbridge Wells</b>          | 1.037 (0.920–1.169)                                                                         | 0.998 (0.952–1.047)                                                                       | 1.007 (0.893–1.135)                                                                  | 0.937 (0.810–1.084)                                                       | 1.019 (0.872–1.190)                                                            | 0.992 (0.740–1.331)                                                                  |
| <b>Uttlesford</b>               | 1.088 (0.899–1.317)                                                                         | 1.008 (0.908–1.120)                                                                       | 0.962 (0.863–1.072)                                                                  | 0.961 (0.801–1.152)                                                       | 1.075 (0.894–1.292)                                                            | 0.922 (0.690–1.231)                                                                  |
| <b>Vale of Glamorgan</b>        | 1.134 (0.977–1.315)                                                                         | 0.951 (0.888–1.018)                                                                       | 1.040 (0.894–1.211)                                                                  | 0.984 (0.931–1.039)                                                       | 1.043 (0.907–1.200)                                                            | 1.102 (0.851–1.427)                                                                  |
| <b>Vale of White Horse</b>      | 1.027 (0.866–1.219)                                                                         | 1.050 (0.956–1.153)                                                                       | 0.984 (0.842–1.151)                                                                  | 0.978 (0.869–1.100)                                                       | 1.134 (0.955–1.348)                                                            | 0.952 (0.686–1.321)                                                                  |
| <b>Wakefield</b>                | 1.051 (0.898–1.230)                                                                         | 0.981 (0.908–1.060)                                                                       | 1.114 (0.996–1.245)                                                                  | 0.958 (0.842–1.090)                                                       | 1.123 (0.961–1.312)                                                            | 1.074 (0.777–1.485)                                                                  |
| <b>Walsall</b>                  | 1.081 (0.896–1.303)                                                                         | 1.029 (0.919–1.152)                                                                       | 1.049 (0.897–1.227)                                                                  | 0.960 (0.813–1.135)                                                       | 0.999 (0.812–1.229)                                                            | 0.882 (0.533–1.461)                                                                  |
| <b>Waltham Forest</b>           | 1.034 (0.878–1.218)                                                                         | 1.010 (0.919–1.109)                                                                       | 0.966 (0.703–1.327)                                                                  | 0.955 (0.873–1.045)                                                       | 1.088 (0.901–1.313)                                                            | 0.957 (0.720–1.274)                                                                  |
| <b>Wandsworth</b>               | 1.101 (0.762–1.592)                                                                         | 0.927 (0.760–1.131)                                                                       | 1.481 (0.988–2.221)                                                                  | 1.013 (0.829–1.237)                                                       | 1.223 (0.921–1.624)                                                            | 1.361 (0.748–2.475)                                                                  |
| <b>Warrington</b>               | 1.005 (0.826–1.224)                                                                         | 0.987 (0.903–1.077)                                                                       | 1.089 (0.945–1.256)                                                                  | 0.962 (0.901–1.027)                                                       | 1.011 (0.811–1.261)                                                            | 0.804 (0.557–1.161)                                                                  |
| <b>Warwick</b>                  | 1.001 (0.869–1.154)                                                                         | 1.028 (0.929–1.139)                                                                       | 0.959 (0.733–1.256)                                                                  | 0.941 (0.824–1.076)                                                       | 1.078 (0.823–1.411)                                                            | 0.825 (0.544–1.253)                                                                  |
| <b>Watford</b>                  | 1.005 (0.905–1.116)                                                                         | 0.992 (0.918–1.072)                                                                       | 0.957 (0.778–1.176)                                                                  | 0.968 (0.891–1.052)                                                       | 1.083 (0.922–1.271)                                                            | 0.914 (0.677–1.233)                                                                  |
| <b>Waverley</b>                 | 1.016 (0.880–1.172)                                                                         | 1.042 (0.952–1.140)                                                                       | 1.003 (0.870–1.156)                                                                  | 0.949 (0.838–1.074)                                                       | 1.111 (0.946–1.306)                                                            | 0.933 (0.695–1.252)                                                                  |
| <b>Wealden</b>                  | 1.025 (0.912–1.153)                                                                         | 1.057 (0.978–1.142)                                                                       | 0.969 (0.903–1.040)                                                                  | 0.929 (0.820–1.052)                                                       | 1.023 (0.841–1.245)                                                            | 0.919 (0.625–1.352)                                                                  |
| <b>Welwyn Hatfield</b>          | 1.033 (0.880–1.213)                                                                         | 0.987 (0.869–1.122)                                                                       | 1.032 (0.928–1.146)                                                                  | 0.974 (0.903–1.050)                                                       | 1.077 (0.881–1.317)                                                            | 0.961 (0.676–1.367)                                                                  |
| <b>West Berkshire</b>           | 1.041 (0.895–1.211)                                                                         | 1.016 (0.929–1.112)                                                                       | 1.001 (0.884–1.134)                                                                  | 0.979 (0.835–1.148)                                                       | 1.136 (0.982–1.314)                                                            | 0.995 (0.781–1.269)                                                                  |
| <b>West Devon</b>               | 0.997 (0.900–1.105)                                                                         | 1.020 (0.974–1.068)                                                                       | 0.961 (0.898–1.029)                                                                  | 1.007 (0.915–1.109)                                                       | 1.040 (0.930–1.163)                                                            | 0.874 (0.700–1.092)                                                                  |
| <b>West Lancashire</b>          | 0.995 (0.781–1.267)                                                                         | 1.082 (0.988–1.185)                                                                       | 0.956 (0.817–1.117)                                                                  | 0.951 (0.792–1.141)                                                       | 0.964 (0.743–1.251)                                                            | 0.692 (0.424–1.128)                                                                  |
| <b>West Oxfordshire</b>         | 0.985 (0.751–1.293)                                                                         | 1.045 (0.936–1.166)                                                                       | 0.964 (0.849–1.093)                                                                  | 0.988 (0.866–1.127)                                                       | 1.177 (0.903–1.533)                                                            | 0.868 (0.498–1.514)                                                                  |
| <b>West Suffolk</b>             | 1.074 (0.892–1.293)                                                                         | 0.981 (0.888–1.083)                                                                       | 0.976 (0.889–1.072)                                                                  | 0.972 (0.831–1.137)                                                       | 1.134 (0.891–1.444)                                                            | 1.036 (0.694–1.546)                                                                  |
| <b>Westminster</b>              | 1.022 (0.631–1.655)                                                                         | 0.975 (0.885–1.075)                                                                       | 1.310 (0.765–2.245)                                                                  | 0.961 (0.661–1.397)                                                       | 1.070 (0.866–1.323)                                                            | 1.072 (0.761–1.511)                                                                  |
| <b>Wigan</b>                    | 1.016 (0.832–1.241)                                                                         | 1.072 (0.986–1.166)                                                                       | 0.975 (0.834–1.139)                                                                  | 1.012 (0.916–1.119)                                                       | 1.041 (0.858–1.263)                                                            | 0.755 (0.504–1.131)                                                                  |
| <b>Wiltshire</b>                | 1.080 (0.898–1.299)                                                                         | 1.052 (0.935–1.184)                                                                       | 1.014 (0.839–1.226)                                                                  | 0.907 (0.757–1.087)                                                       | 1.101 (0.884–1.371)                                                            | 0.939 (0.576–1.533)                                                                  |
| <b>Winchester</b>               | 1.075 (0.897–1.289)                                                                         | 1.025 (0.940–1.116)                                                                       | 1.032 (0.903–1.179)                                                                  | 0.915 (0.693–1.208)                                                       | 1.121 (0.910–1.380)                                                            | 0.953 (0.628–1.447)                                                                  |
| <b>Windsor &amp; Maidenhead</b> | 1.081 (0.948–1.231)                                                                         | 1.022 (0.935–1.117)                                                                       | 1.000 (0.927–1.079)                                                                  | 0.937 (0.831–1.055)                                                       | 1.070 (0.883–1.296)                                                            | 0.907 (0.706–1.164)                                                                  |
| <b>Wirral</b>                   | 1.111 (0.859–1.437)                                                                         | 1.061 (0.908–1.240)                                                                       | 1.015 (0.781–1.318)                                                                  | 0.958 (0.829–1.109)                                                       | 0.927 (0.679–1.266)                                                            | 0.728 (0.386–1.374)                                                                  |
| <b>Woking</b>                   | 1.014 (0.915–1.123)                                                                         | 1.017 (0.963–1.074)                                                                       | 1.002 (0.901–1.115)                                                                  | 0.972 (0.859–1.101)                                                       | 1.052 (0.943–1.174)                                                            | 0.965 (0.799–1.166)                                                                  |
| <b>Wokingham</b>                | 1.025 (0.898–1.168)                                                                         | 0.995 (0.926–1.070)                                                                       | 1.002 (0.915–1.096)                                                                  | 0.984 (0.934–1.037)                                                       | 1.094 (0.963–1.243)                                                            | 0.979 (0.773–1.240)                                                                  |
| <b>Wolverhampton</b>            | 1.040 (0.863–1.253)                                                                         | 1.118 (1.008–1.241)                                                                       | 0.911 (0.731–1.137)                                                                  | 0.904 (0.760–1.075)                                                       | 1.072 (0.862–1.334)                                                            | 0.834 (0.528–1.319)                                                                  |
| <b>Worcester</b>                | 1.087 (0.809–1.460)                                                                         | 1.047 (0.947–1.158)                                                                       | 1.029 (0.919–1.152)                                                                  | 0.977 (0.793–1.203)                                                       | 1.052 (0.748–1.479)                                                            | 0.921 (0.524–1.619)                                                                  |
| <b>Worthing</b>                 | 0.937 (0.714–1.230)                                                                         | 1.026 (0.929–1.133)                                                                       | 1.008 (0.736–1.380)                                                                  | 0.937 (0.842–1.044)                                                       | 1.180 (0.902–1.545)                                                            | 0.728 (0.354–1.498)                                                                  |
| <b>Wrexham</b>                  | 1.007 (0.849–1.196)                                                                         | 0.999 (0.896–1.113)                                                                       | 1.090 (0.870–1.366)                                                                  | 0.954 (0.842–1.081)                                                       | 1.092 (0.872–1.367)                                                            | 1.058 (0.743–1.506)                                                                  |
| <b>Wychavon</b>                 | 1.015 (0.878–1.174)                                                                         | 1.044 (0.968–1.126)                                                                       | 1.001 (0.940–1.065)                                                                  | 0.940 (0.802–1.103)                                                       | 1.072 (0.892–1.288)                                                            | 0.845 (0.531–1.343)                                                                  |
| <b>Wycombe</b>                  | 1.041 (0.872–1.242)                                                                         | 1.005 (0.928–1.088)                                                                       | 0.939 (0.800–1.103)                                                                  | 0.964 (0.839–1.109)                                                       | 1.115 (0.940–1.324)                                                            | 0.923 (0.640–1.331)                                                                  |
| <b>Wyre</b>                     | 1.040 (0.912–1.186)                                                                         | 1.012 (0.944–1.084)                                                                       | 1.008 (0.956–1.062)                                                                  | 0.971 (0.853–1.105)                                                       | 1.095 (0.870–1.379)                                                            | 0.875 (0.557–1.373)                                                                  |
| <b>Wyre Forest</b>              | 1.133 (0.969–1.324)                                                                         | 0.997 (0.916–1.085)                                                                       | 1.052 (0.949–1.166)                                                                  | 0.948 (0.851–1.056)                                                       | 1.018 (0.864–1.201)                                                            | 0.953 (0.687–1.321)                                                                  |
| <b>York</b>                     | 1.127 (0.818–1.552)                                                                         | 0.952 (0.791–1.145)                                                                       | 1.069 (0.819–1.396)                                                                  | 0.987 (0.742–1.314)                                                       | 1.057 (0.745–1.498)                                                            | 1.038 (0.616–1.749)                                                                  |

\*Baseline period: 3rd Jan 2020–6th Feb 2020.

**Table S5. Meta-regression findings showing the modifiers of the association between six Google community mobility metrics and R, as the ratio of R ratios (95% CI)**

| Mobility metrics    | Population density<br>(per 1000 persons/km <sup>2</sup><br>increase) | Prosperity score*<br>(per 0.1 points increase) | % BAME population<br>(per 10% increase) | Latitude<br>(per 2 degrees increase) | % Households with 6+<br>members<br>(per 1% increase) |
|---------------------|----------------------------------------------------------------------|------------------------------------------------|-----------------------------------------|--------------------------------------|------------------------------------------------------|
| Retail & recreation | 0.991 (0.984–0.999)                                                  | 0.976 (0.955–0.997)                            | 1.011 (0.998–1.023)                     | 1.001 (0.985–1.018)                  | —                                                    |
| Grocery & pharmacy  | 0.997 (0.997–1.005)                                                  | 1.003 (0.991–1.015)                            | 0.997 (0.991–1.004)                     | 1.009 (1.000–1.018)                  | —                                                    |
| Transit stations    | 1.010 (1.002–1.017)                                                  | 1.015 (0.998–1.033)                            | 1.002 (0.988–1.015)                     | 1.010 (0.998–1.022)                  | —                                                    |
| Parks               | 1.000 (0.996–1.005)                                                  | 0.995 (0.981–1.010)                            | 0.999 (0.992–1.005)                     | 0.994 (0.984–1.004)                  | —                                                    |
| Workplaces          | 1.002 (0.995–1.010)                                                  | 1.006 (0.981–1.032)                            | 1.000 (0.986–1.013)                     | 0.955 (0.938–0.973)                  | —                                                    |
| Residential         | 1.002 (0.988–1.016)                                                  | 1.012 (0.960–1.066)                            | 1.003 (0.958–1.050)                     | 0.948 (0.913–0.984)                  | 1.002 (0.997–1.012)                                  |

BAME = Black, Asian and minority ethnic. R ratio indicated the weekly change in R associated with weekly difference in mobility metrics relative to the baseline level (baseline period: 3<sup>rd</sup> Jan 2020–6<sup>th</sup> Feb 2020). The ratio of R ratios quantified the modification per unit increase in the potential modifiers. Interpretation of the direction of modification is dependent on the R ratio of the corresponding mobility metric (shown in **Table 1**).

\*A higher prosperity index indicates less deprivation.

**Figure S1. Change over time (by week) in the mobility metrics and R on the local-authority level**

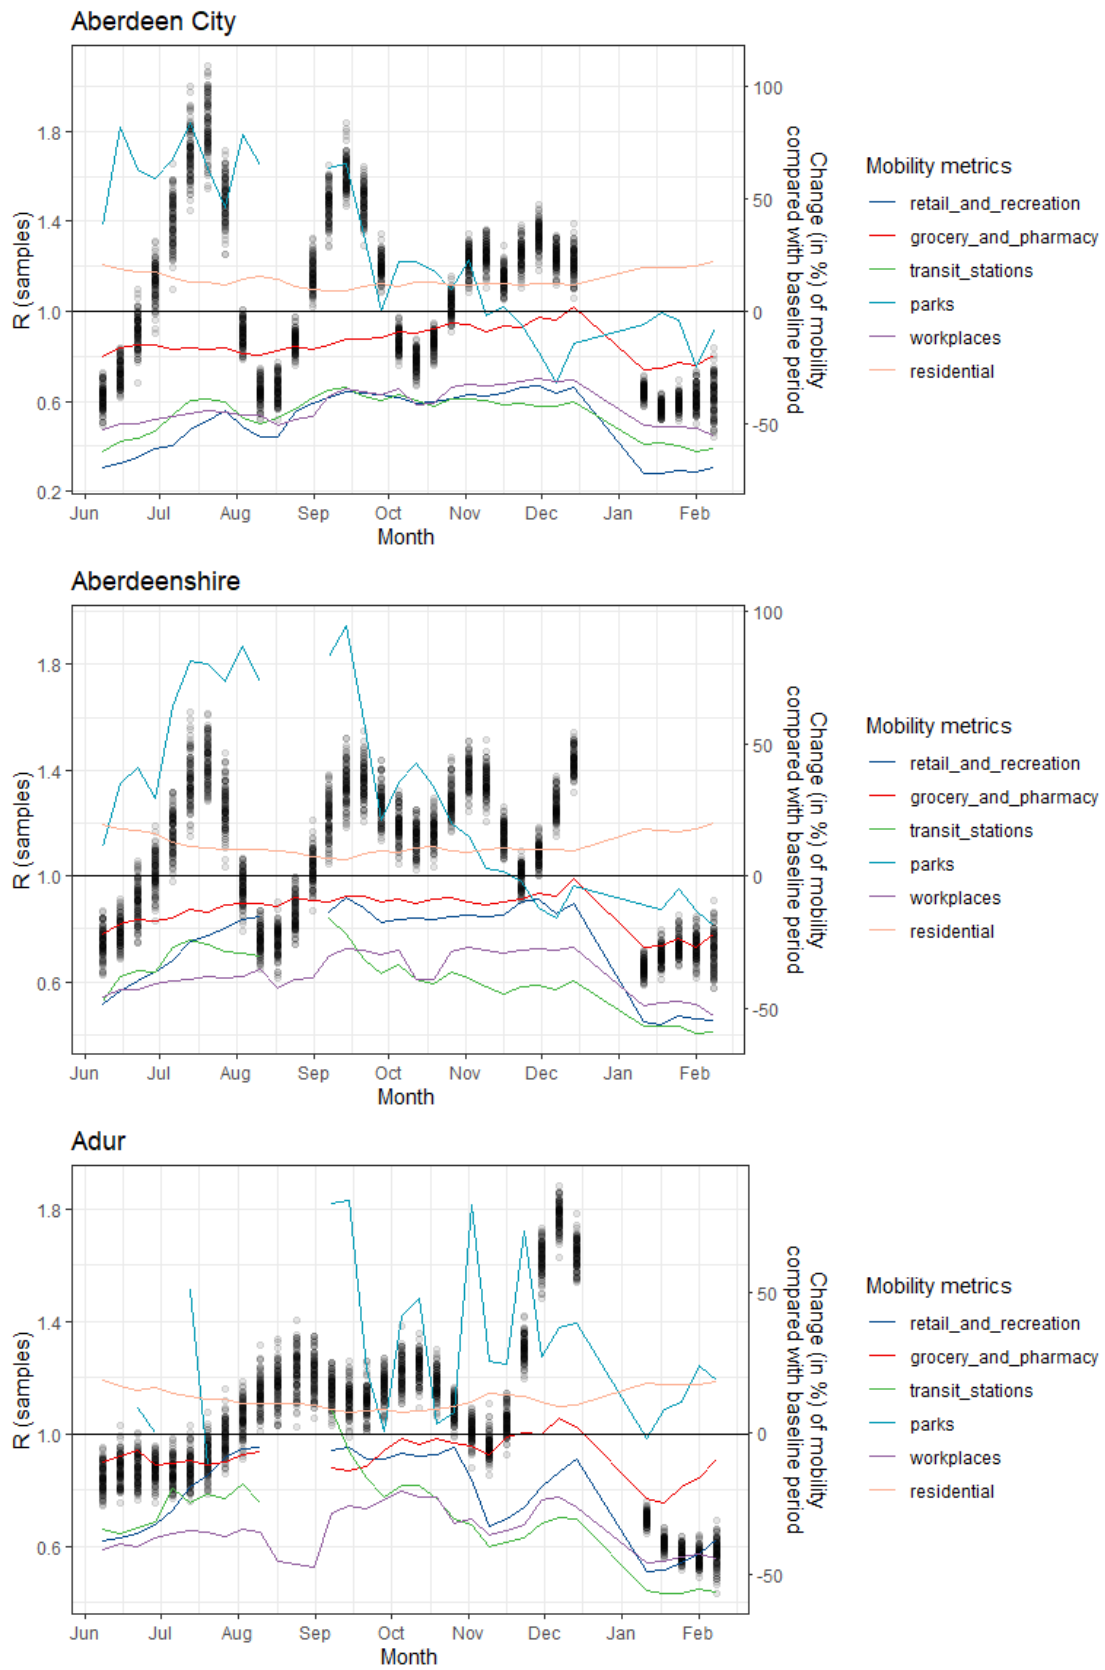

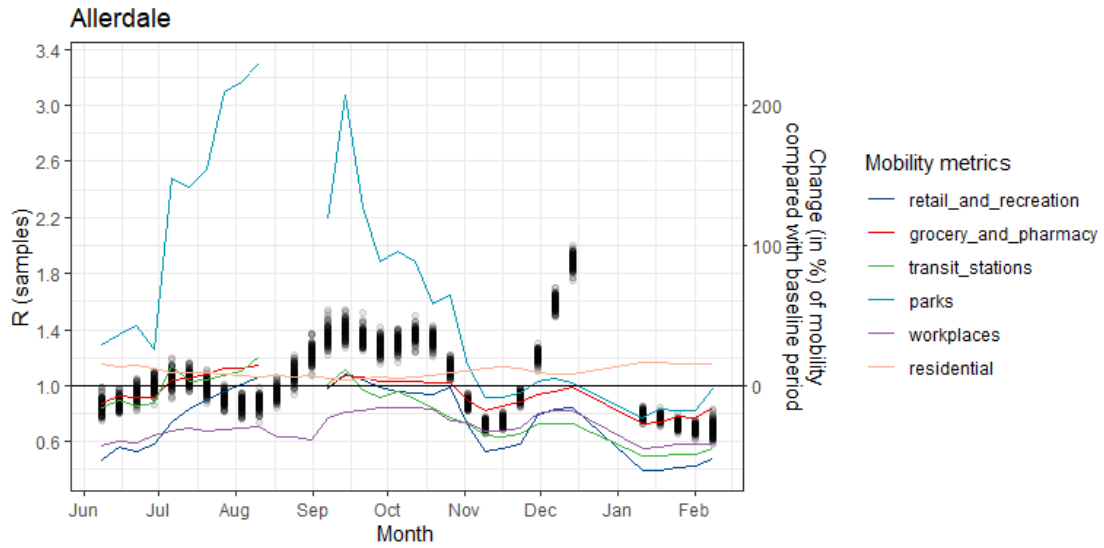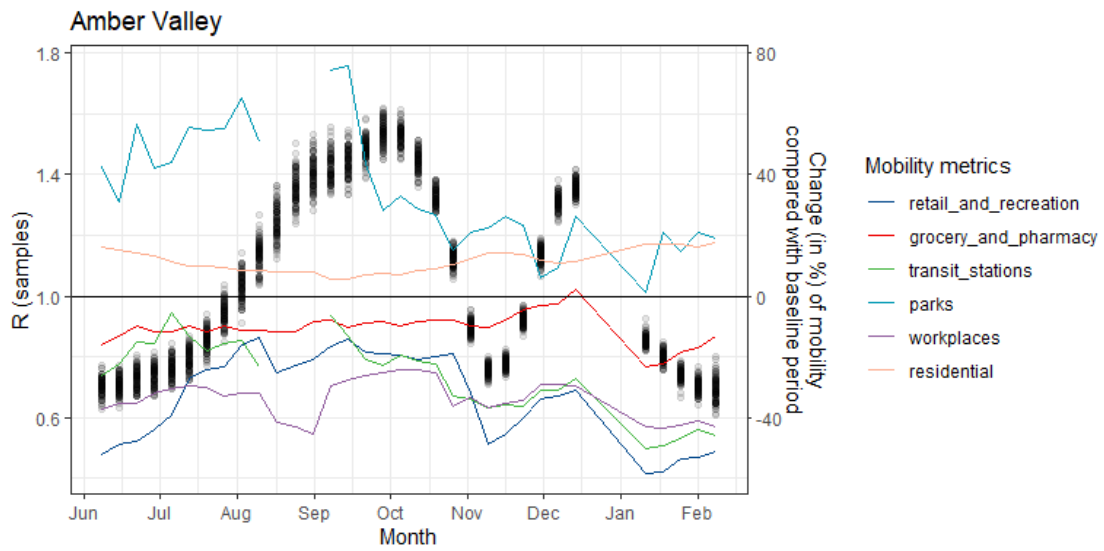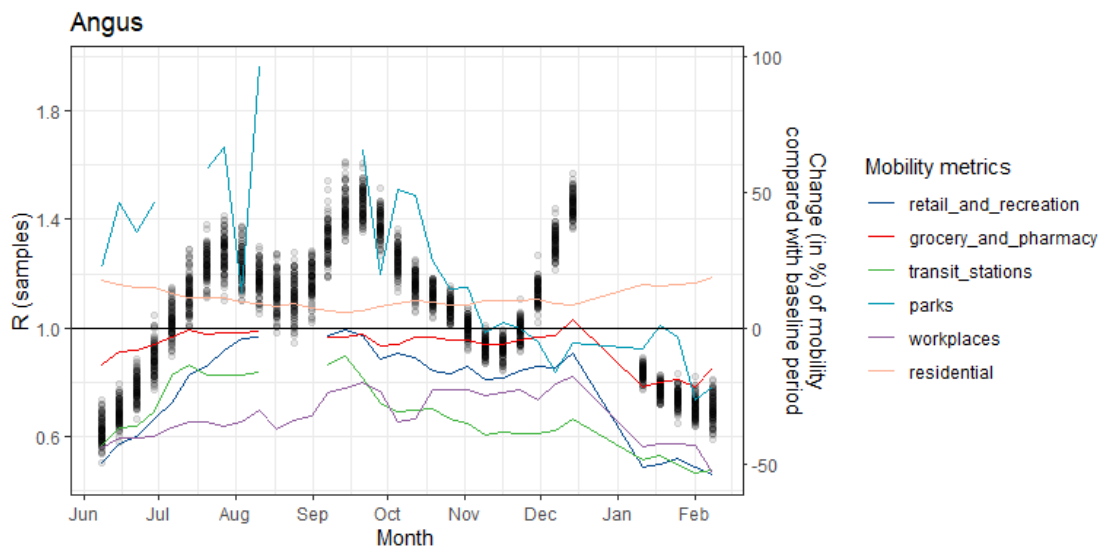

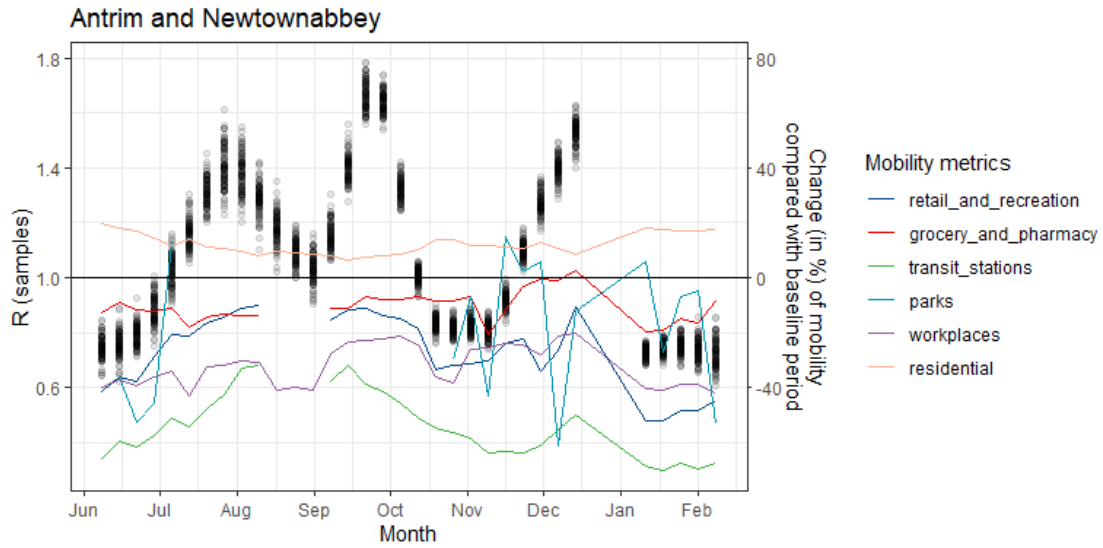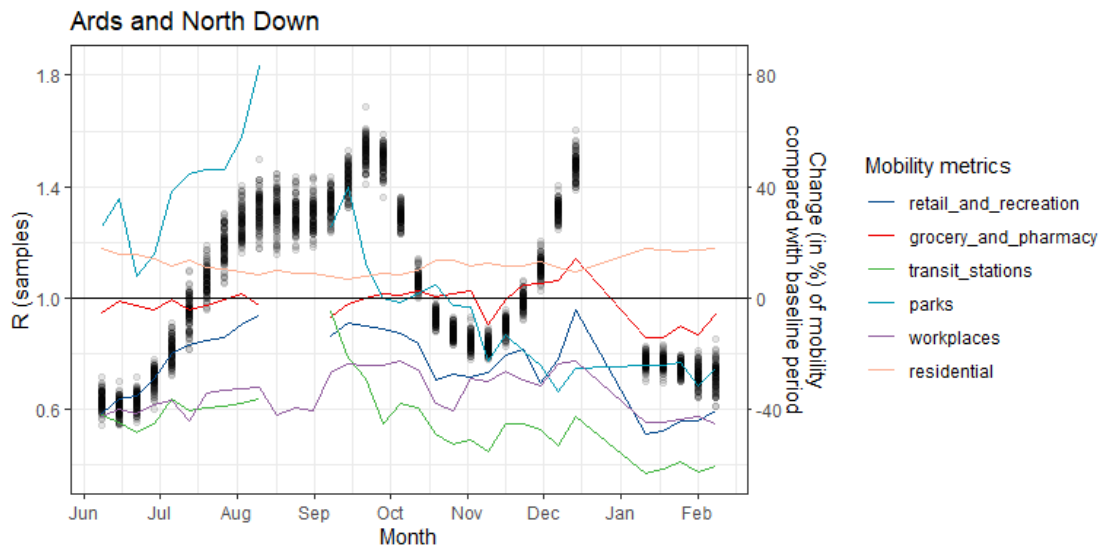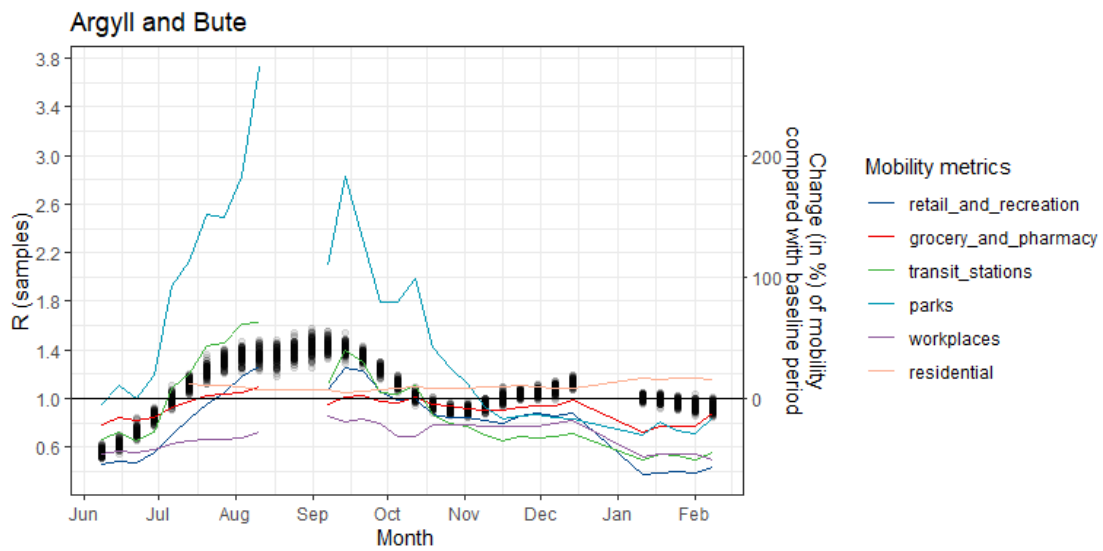



Armagh City, Banbridge and Craigavon

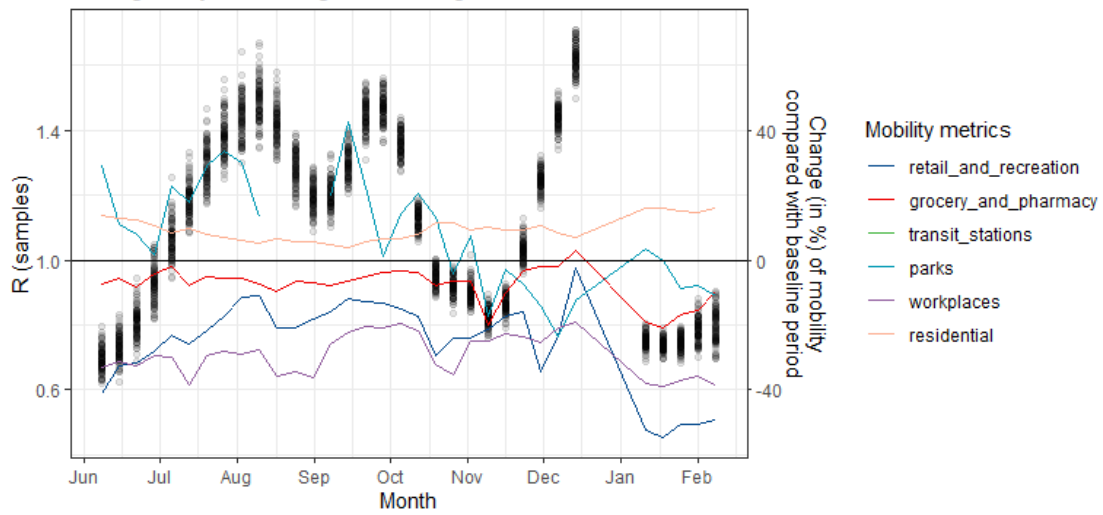

Arun

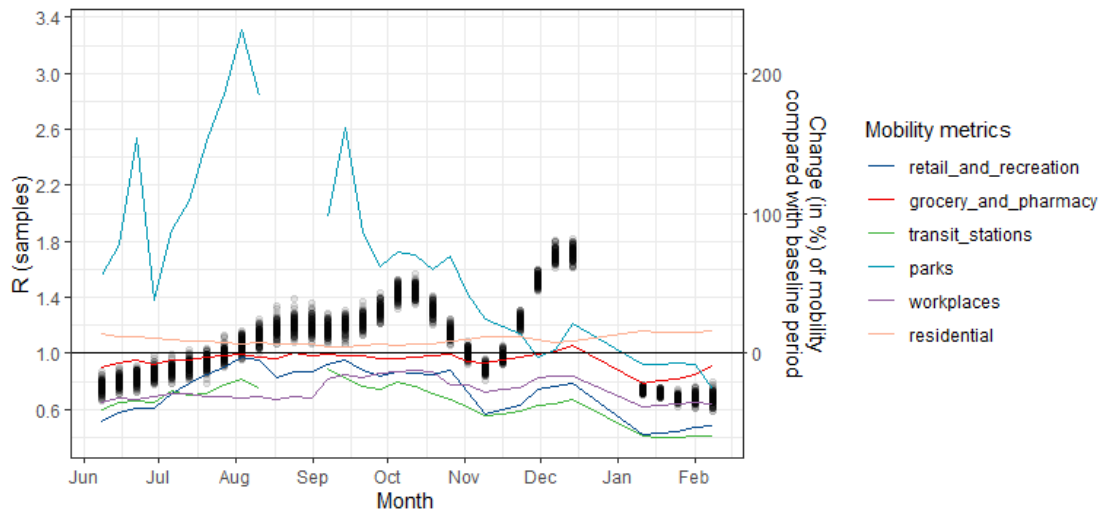

Ashfield

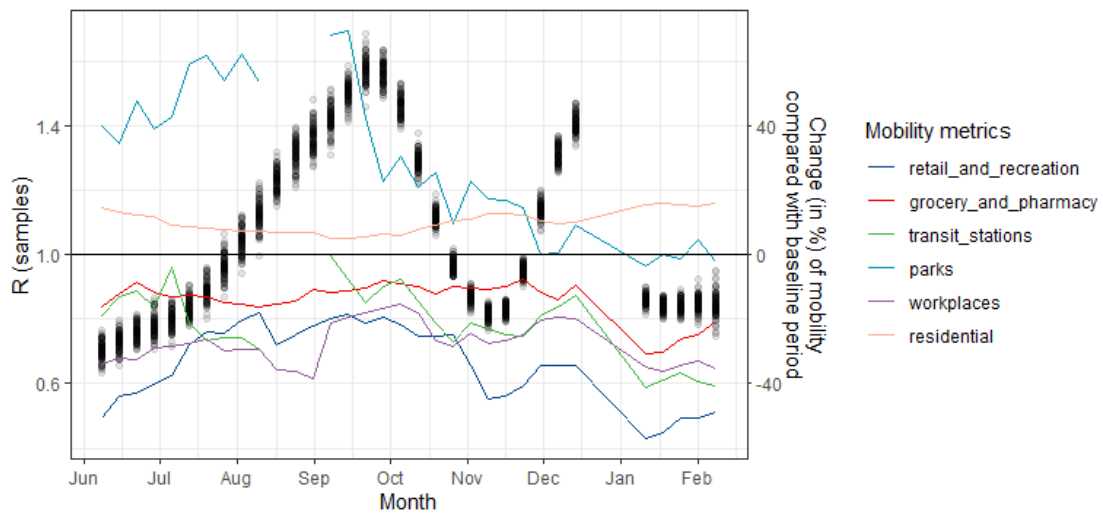

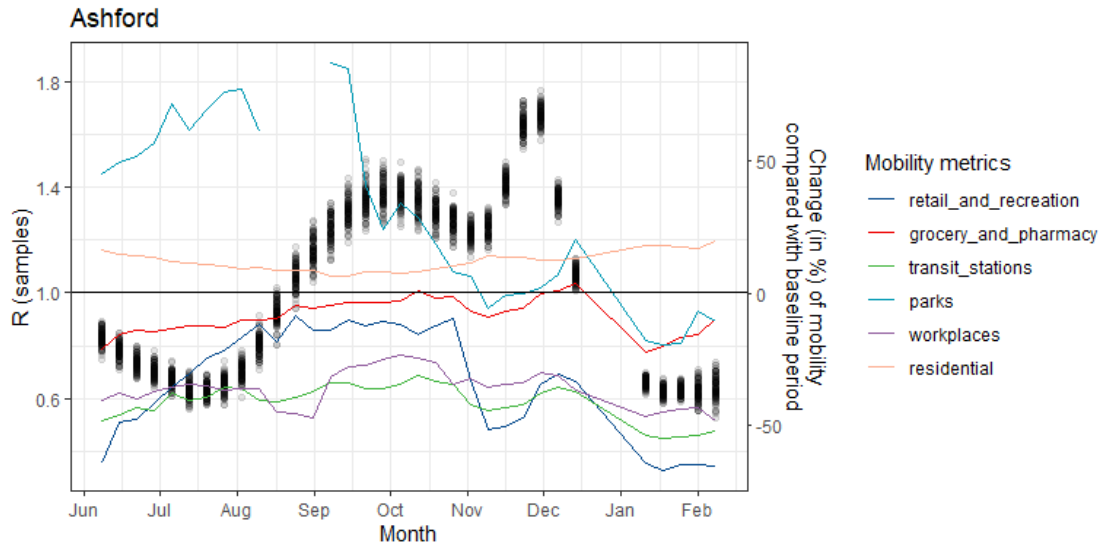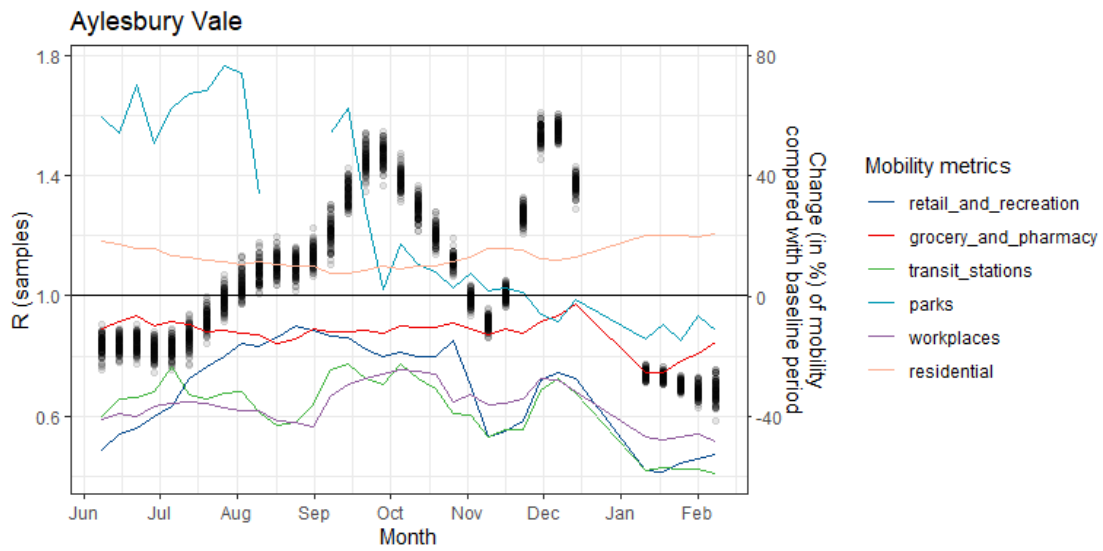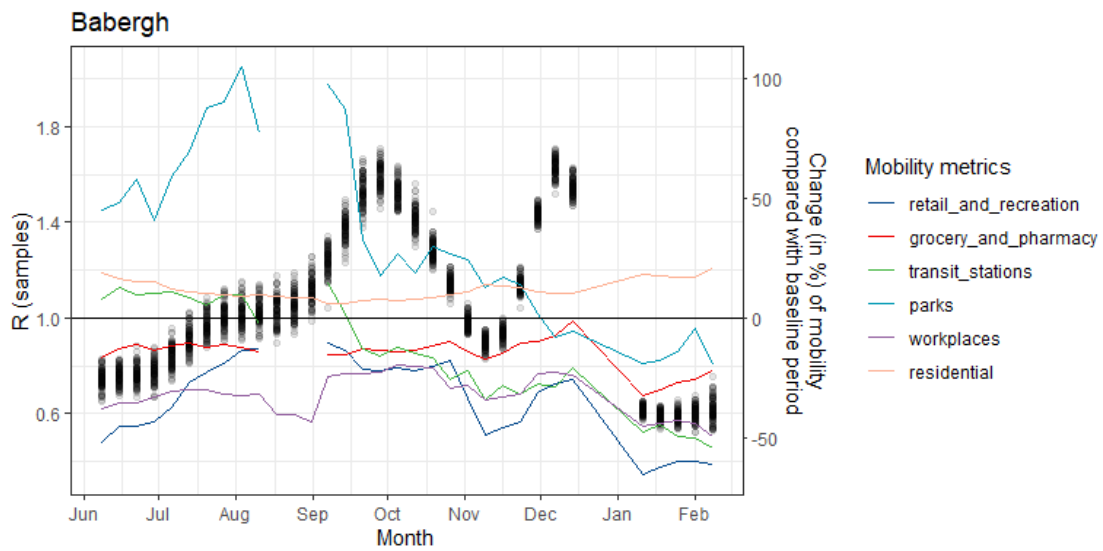

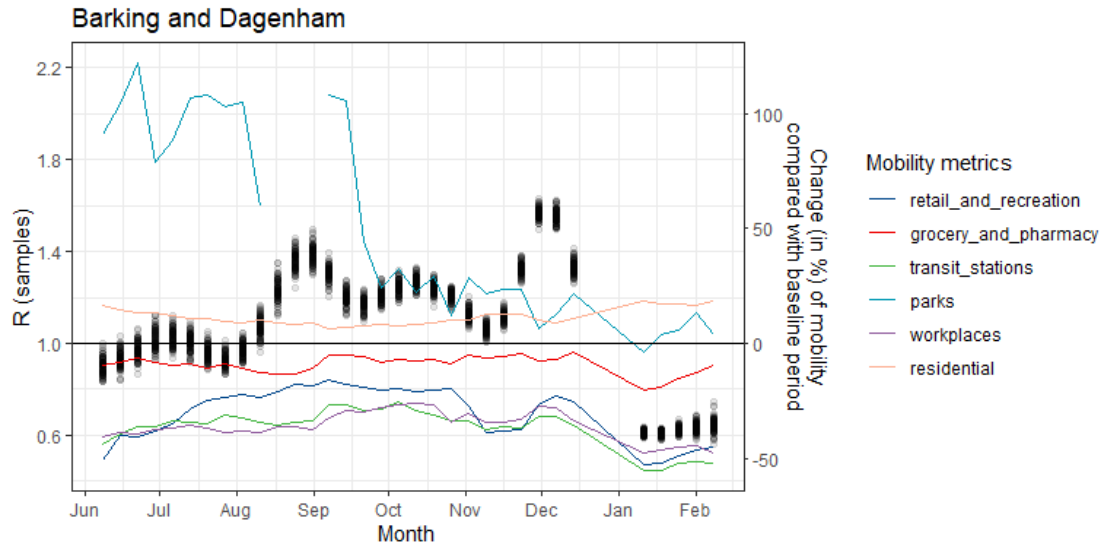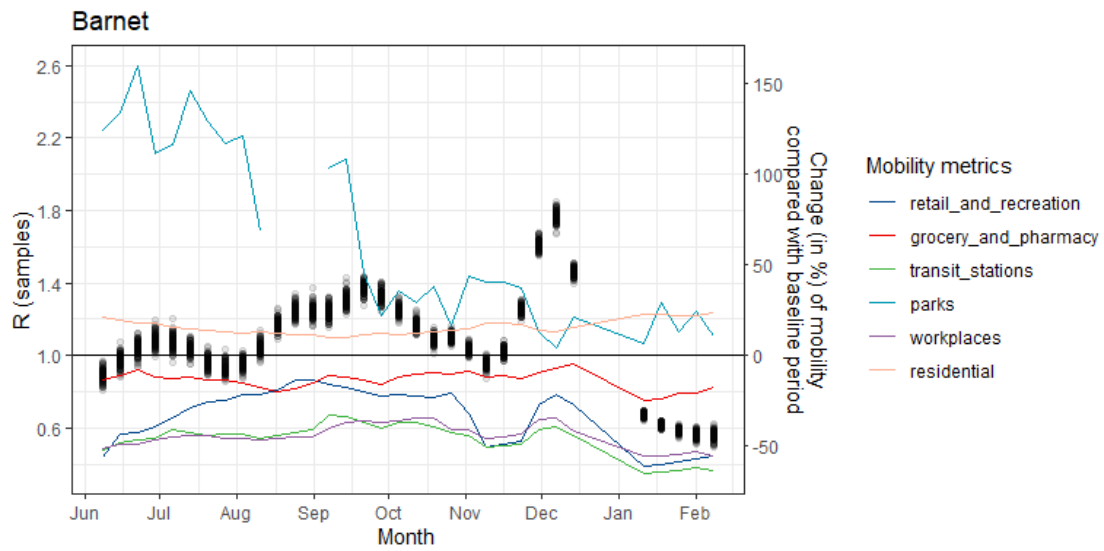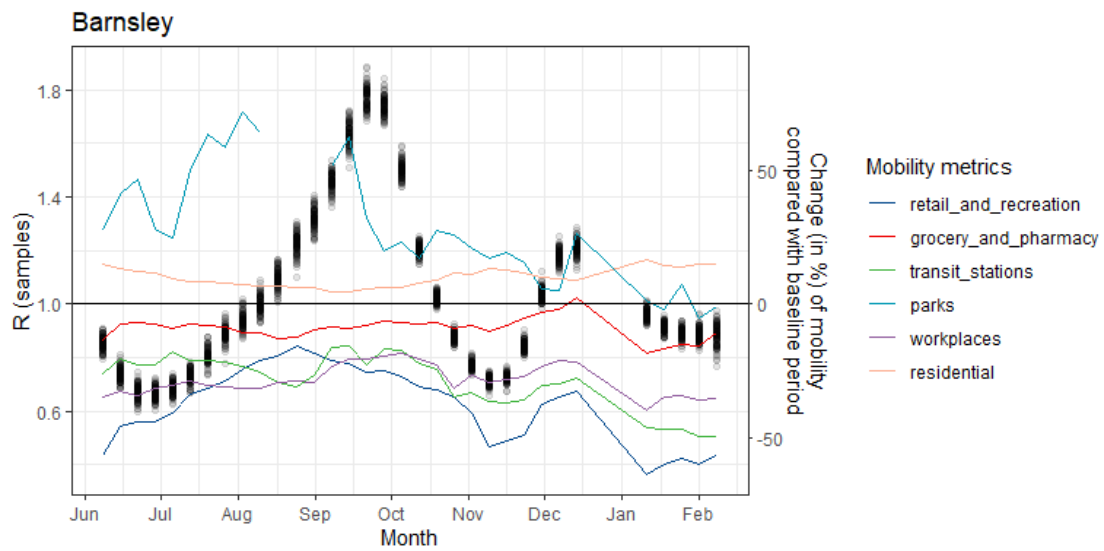

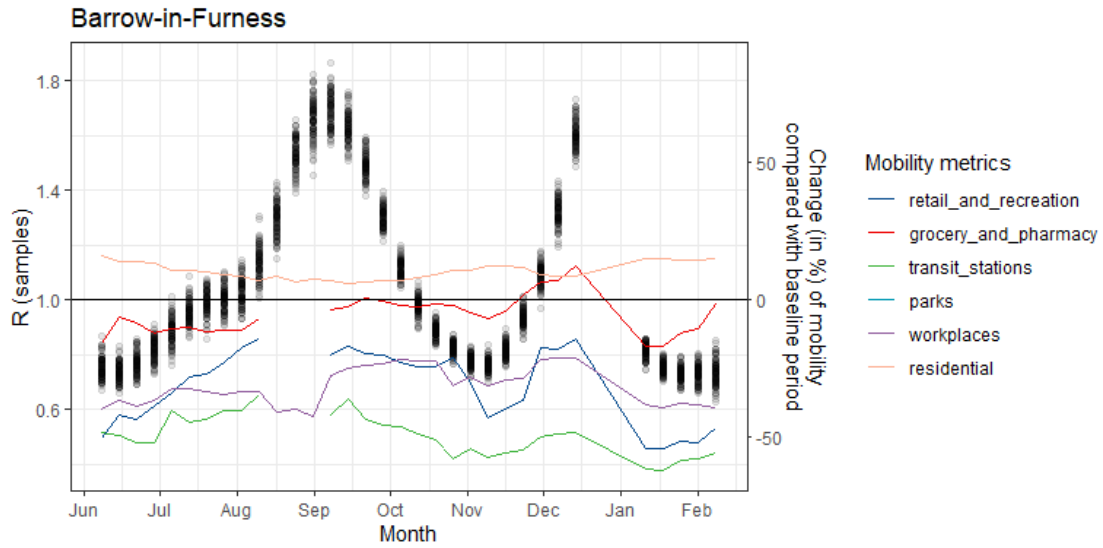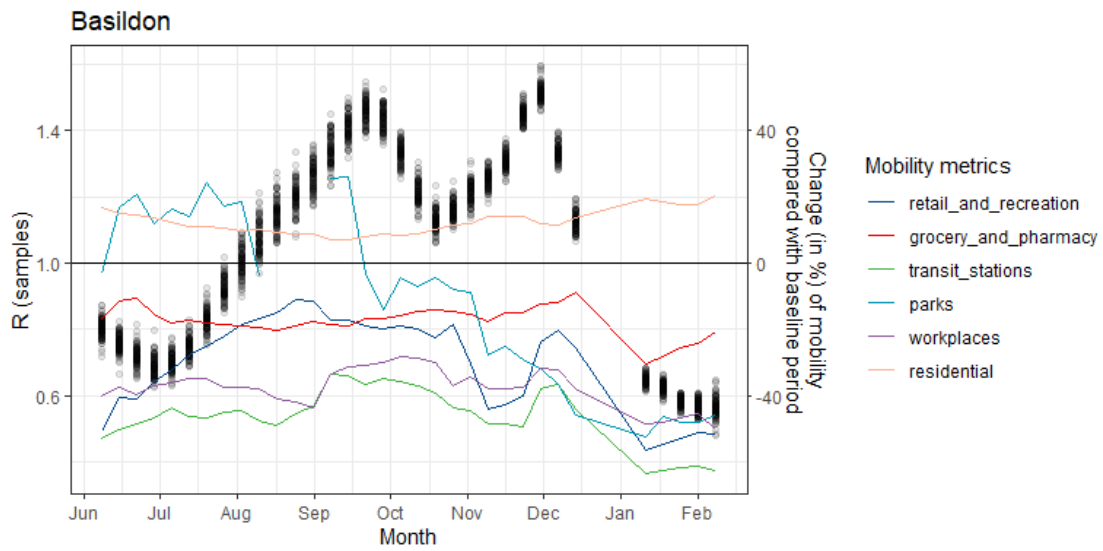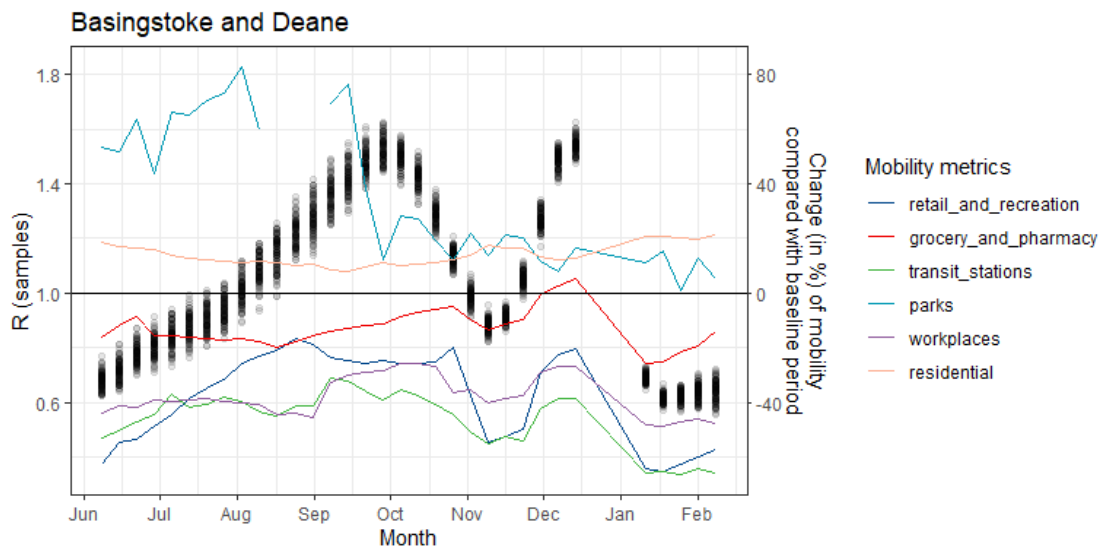

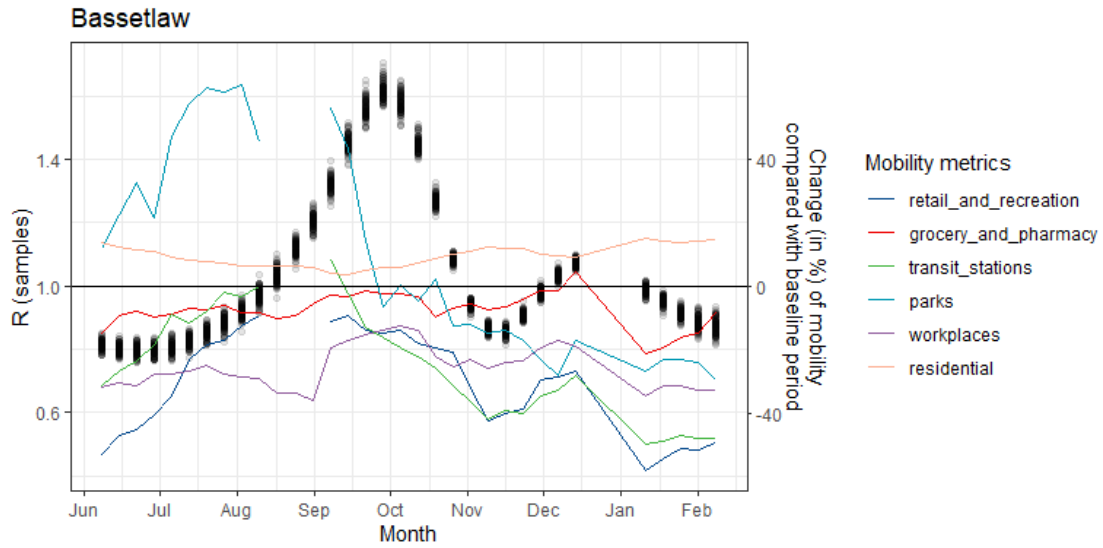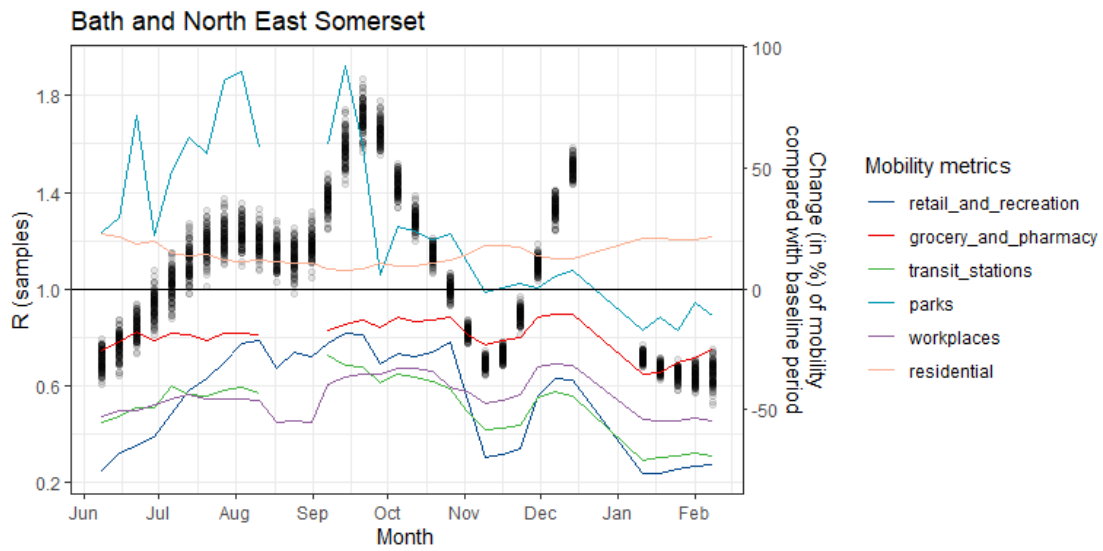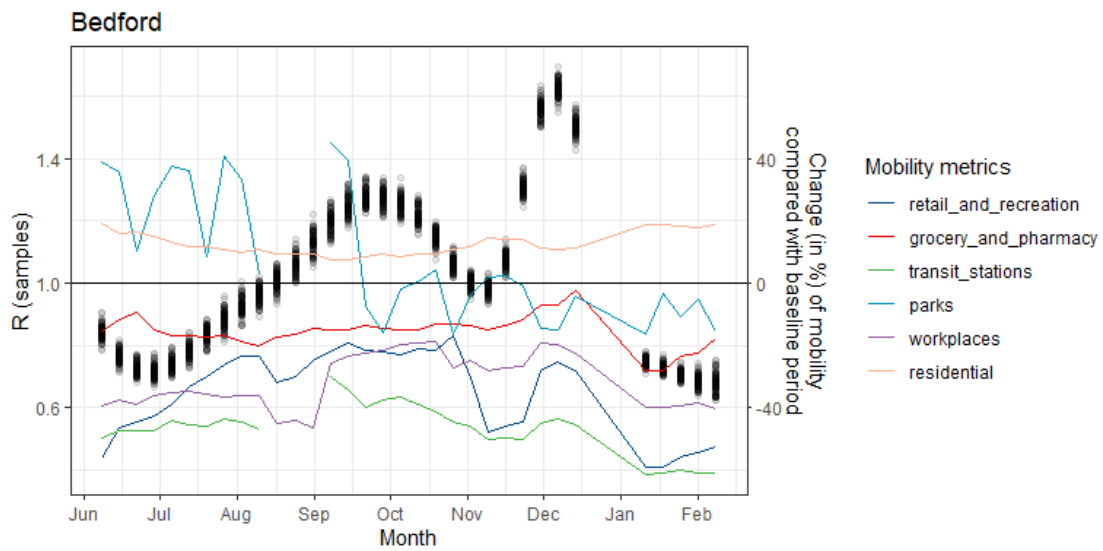

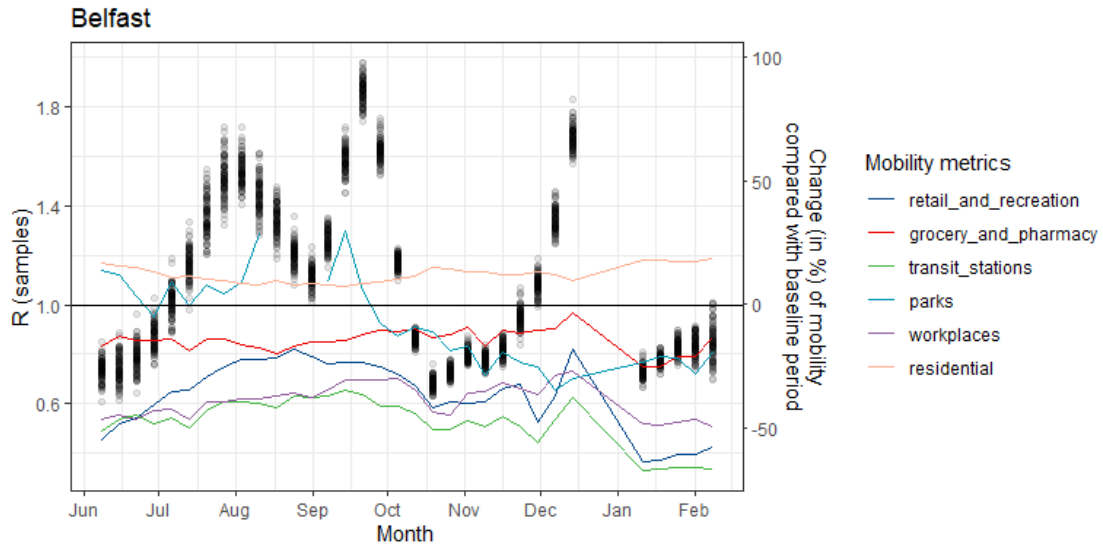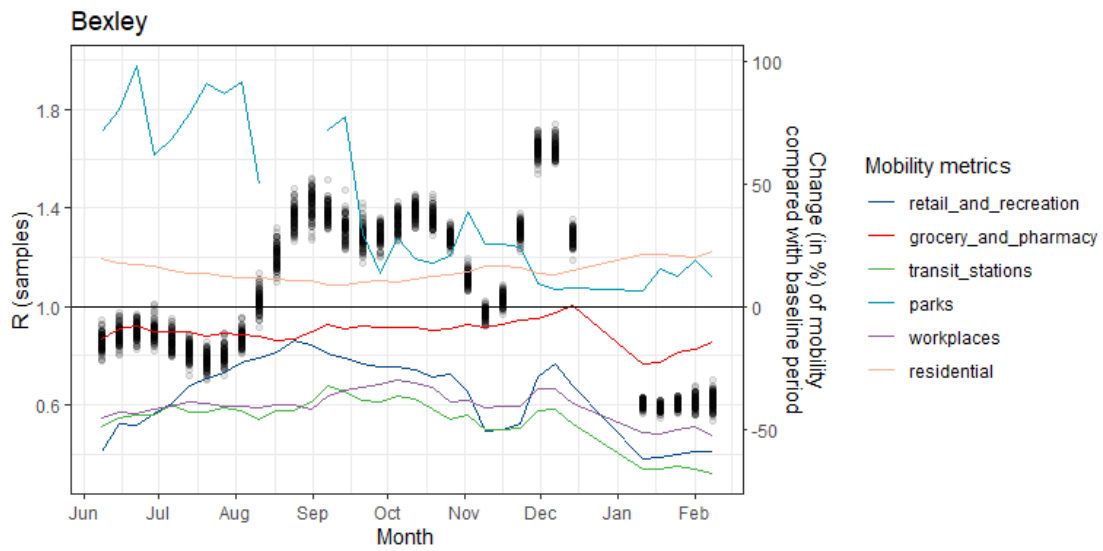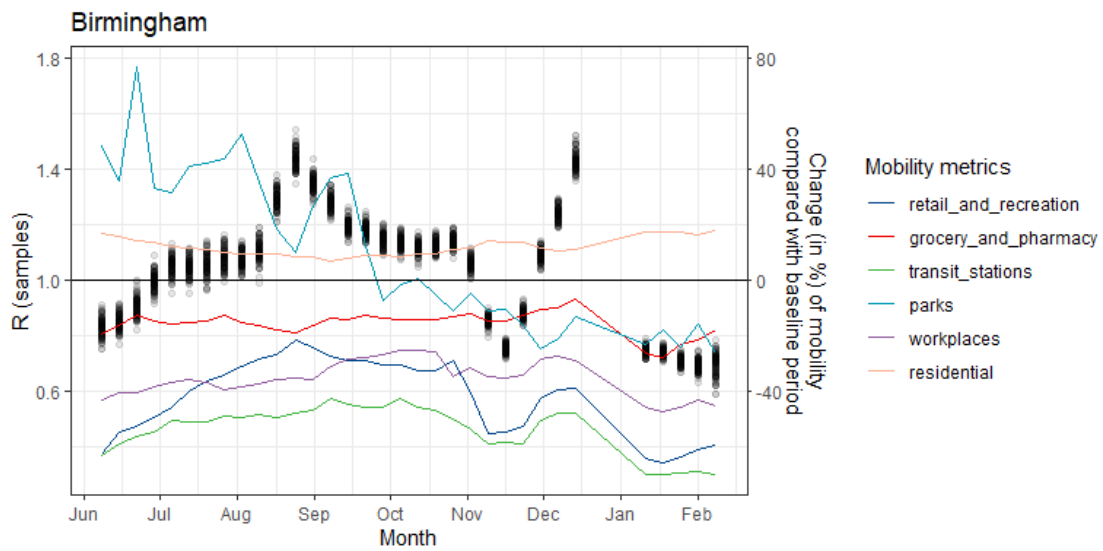

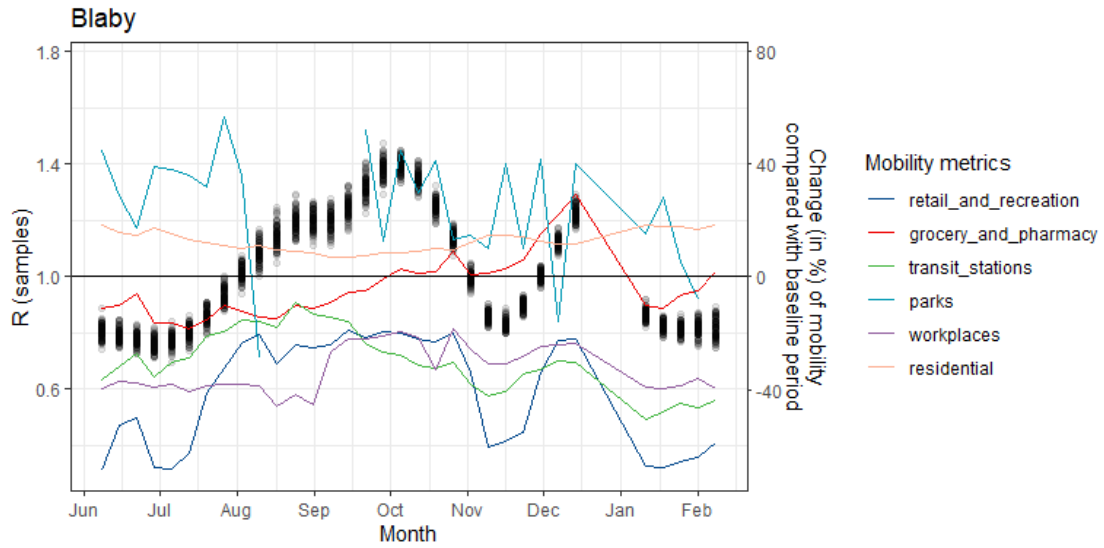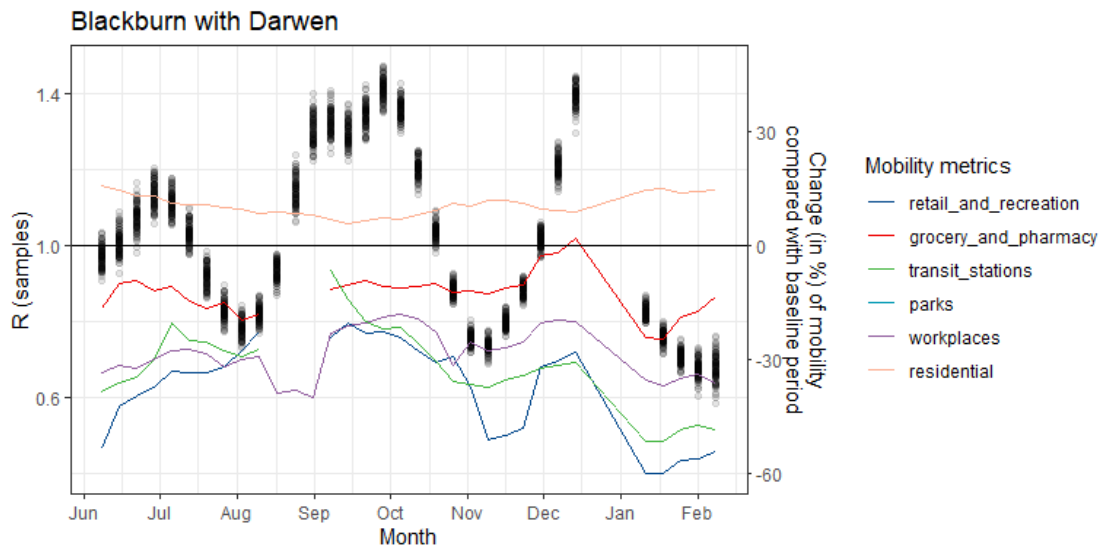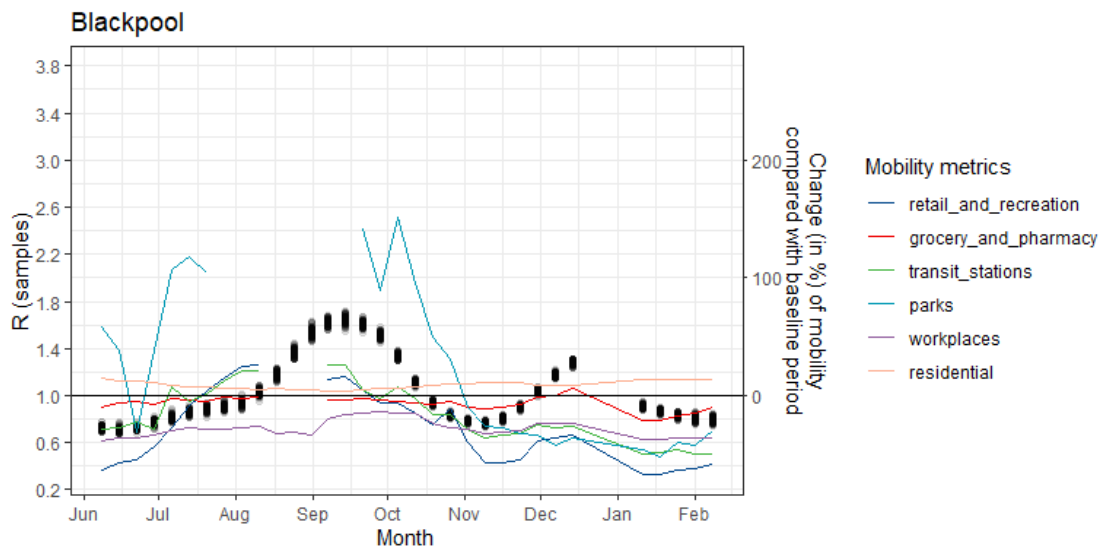

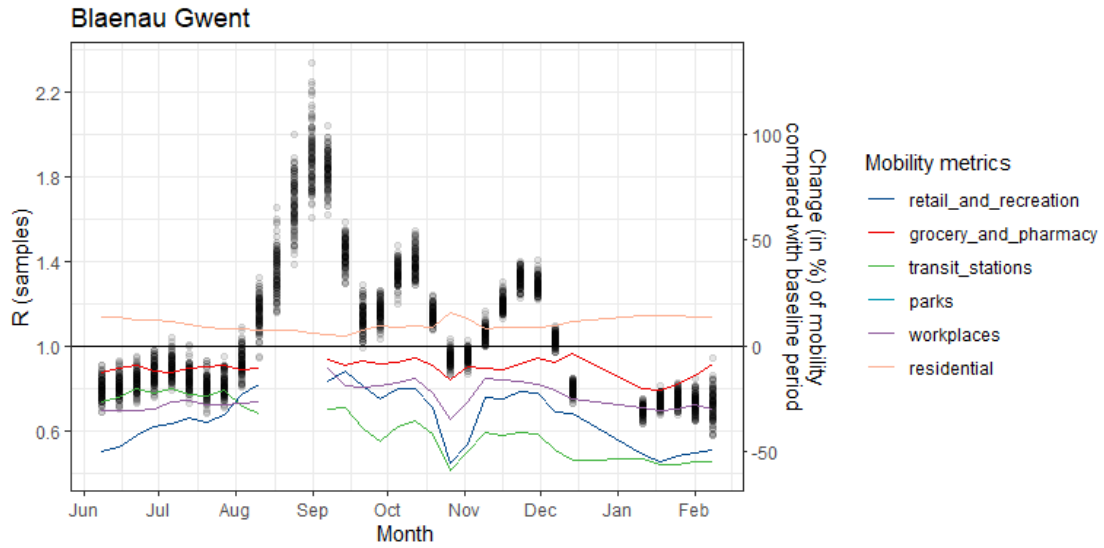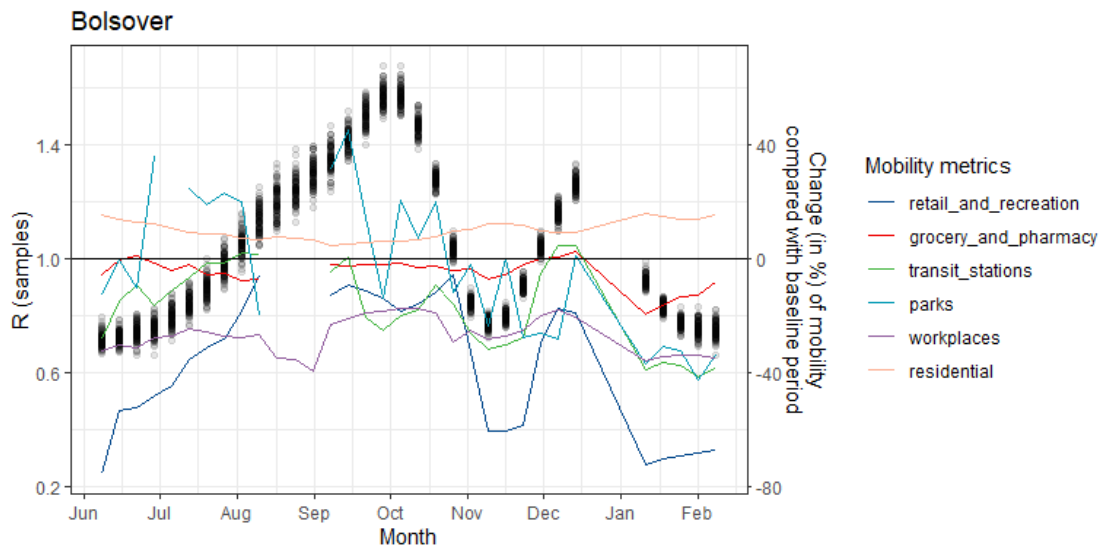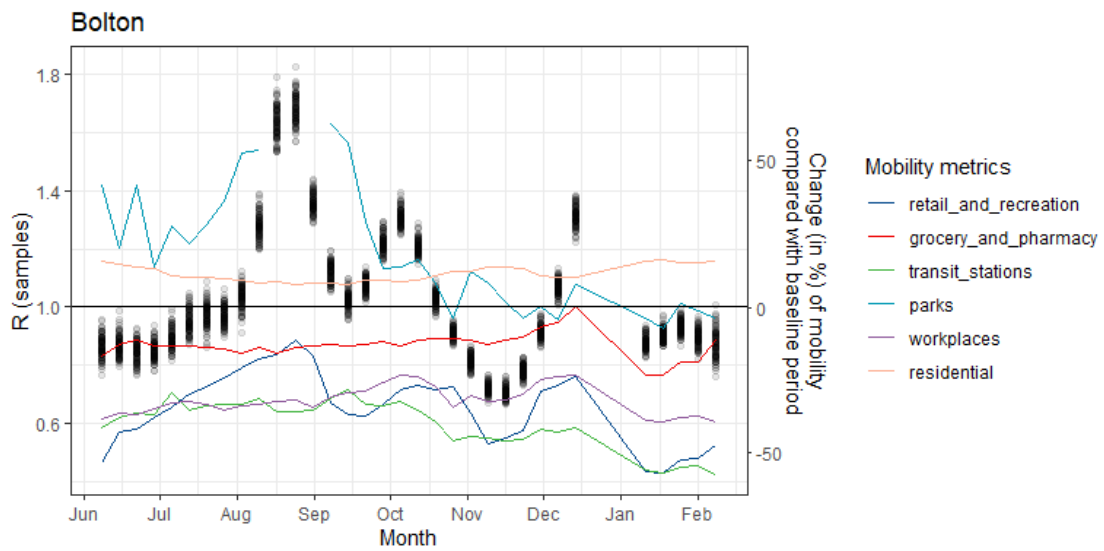



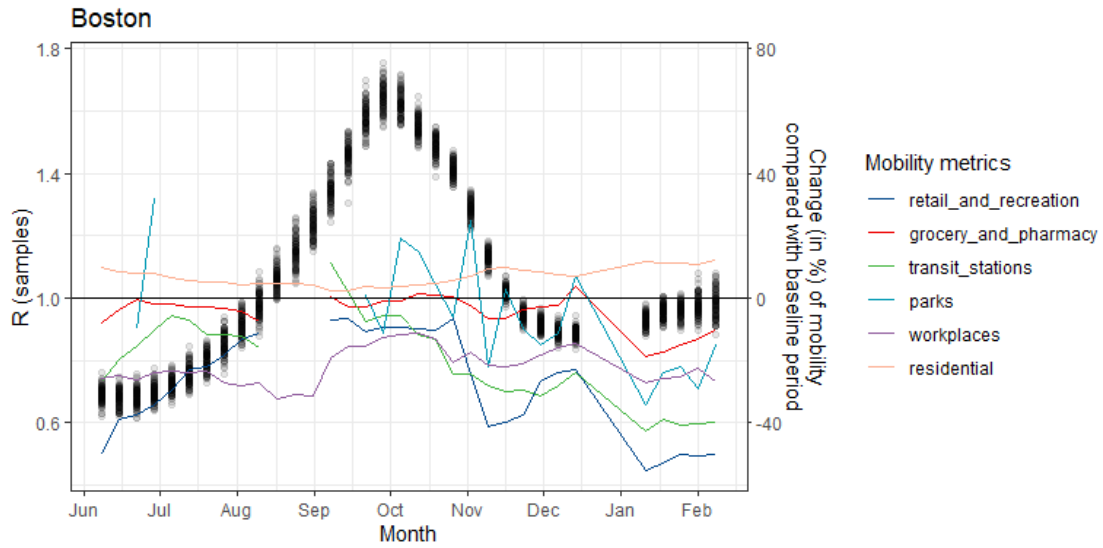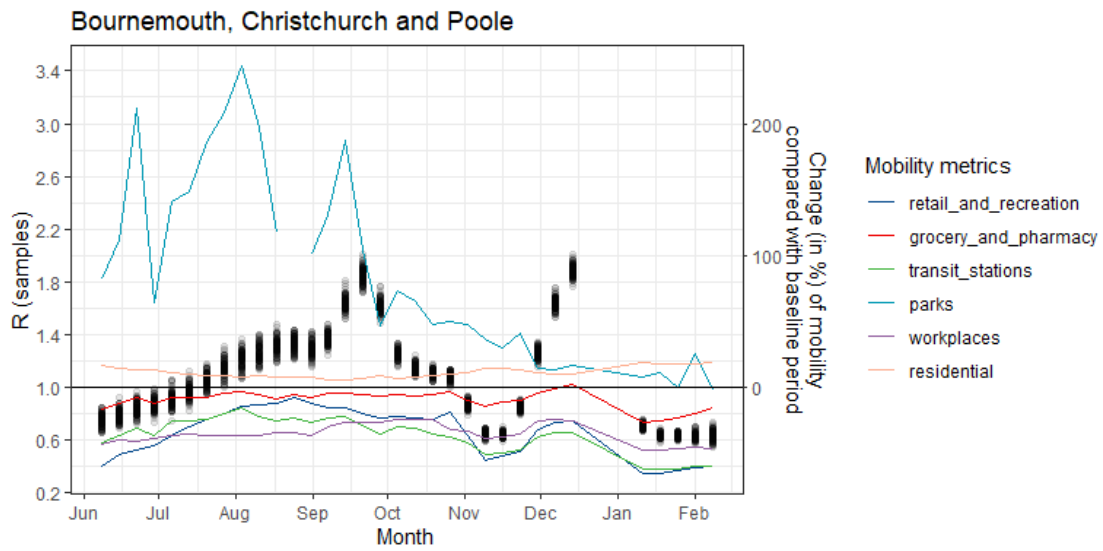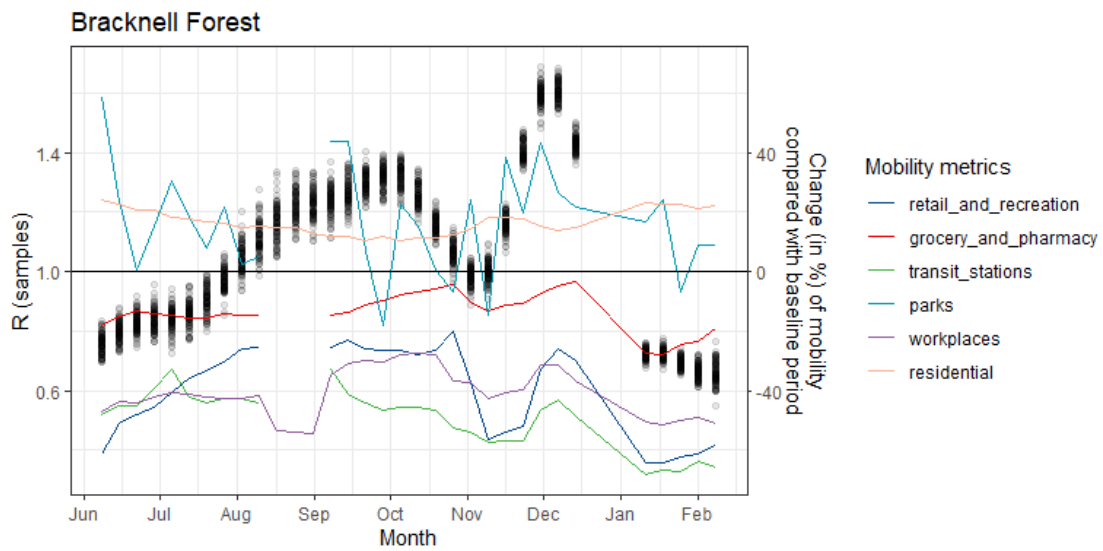

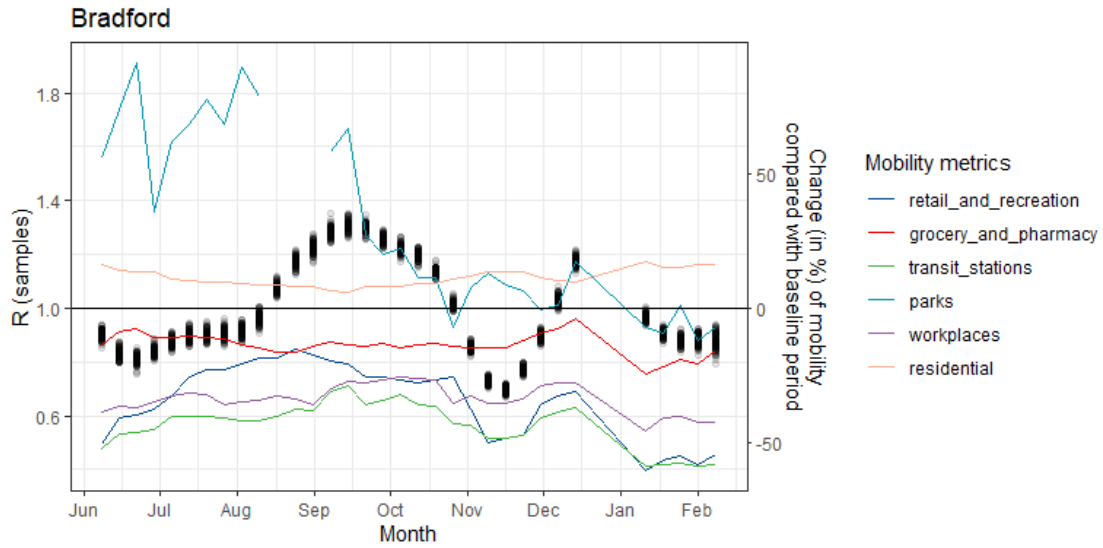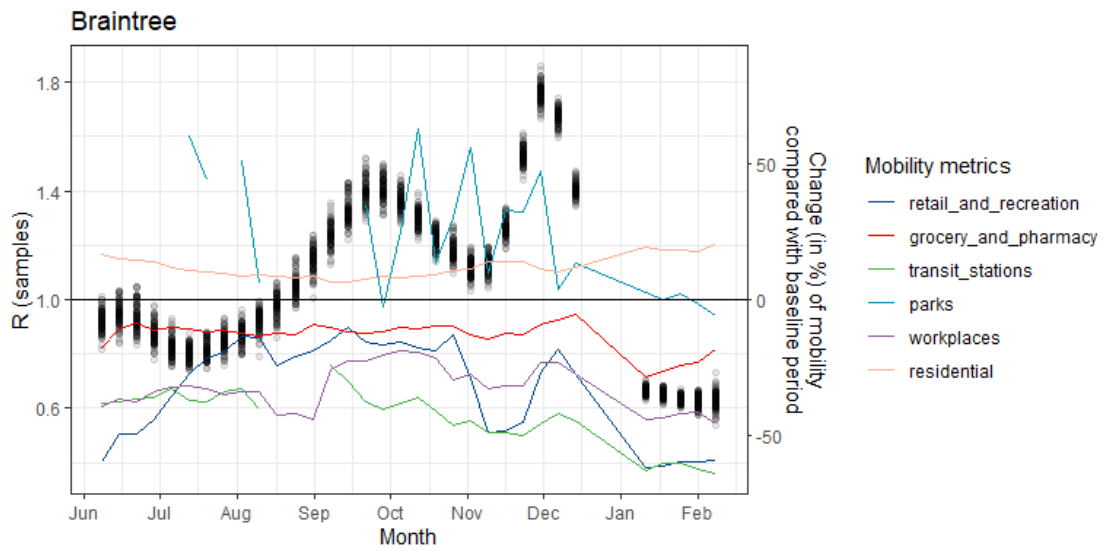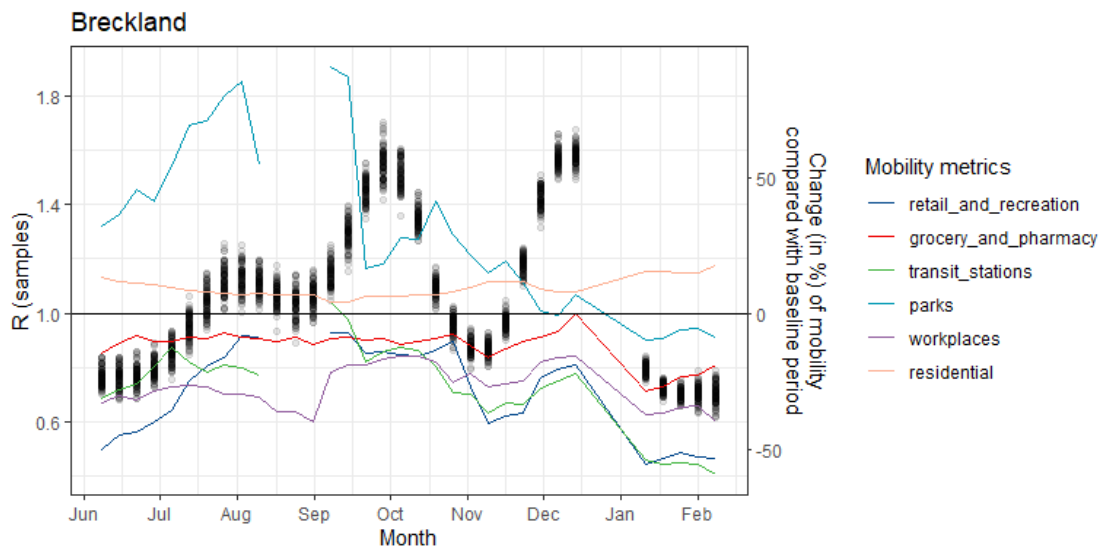

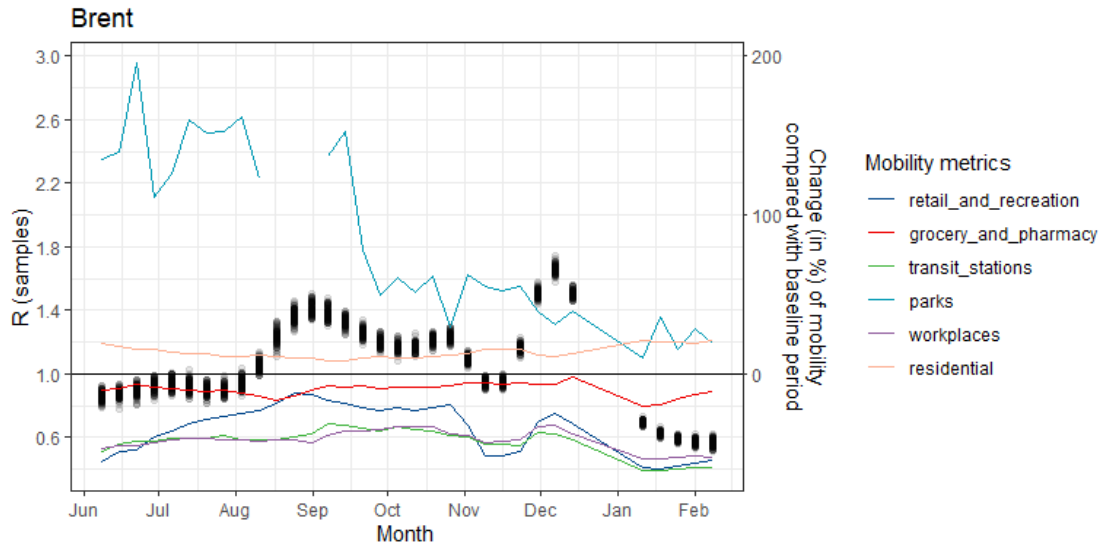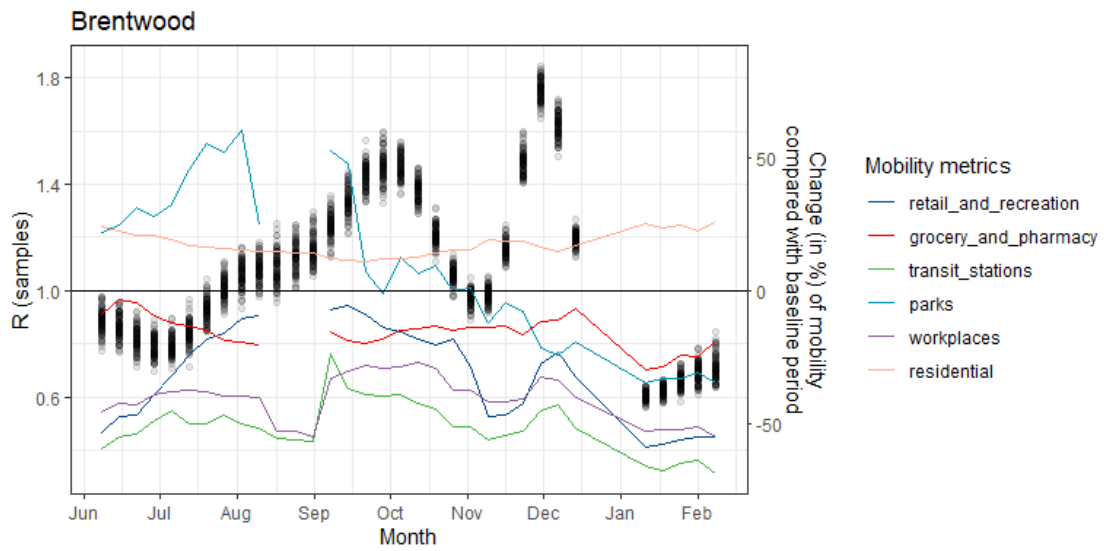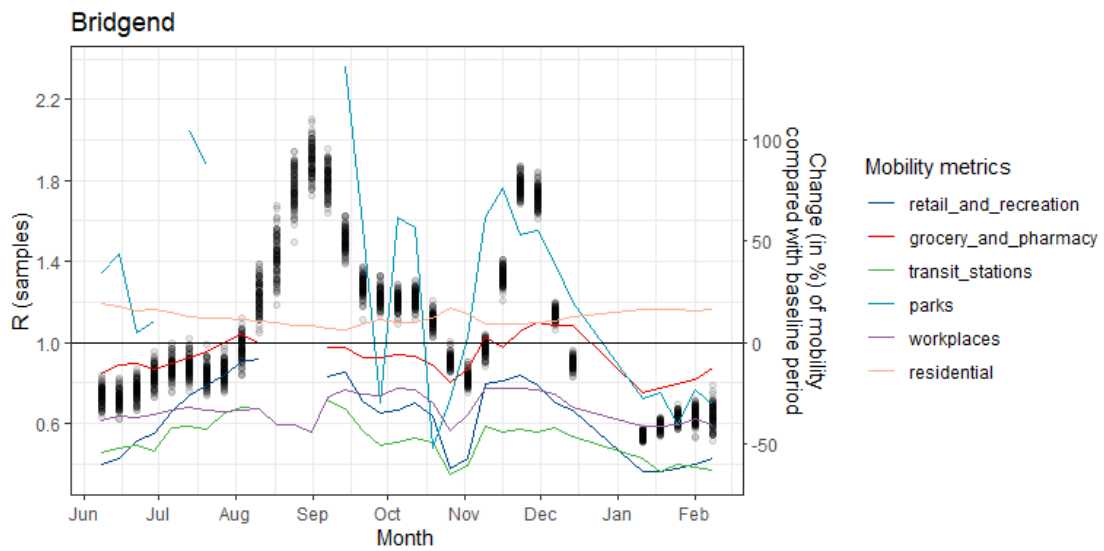

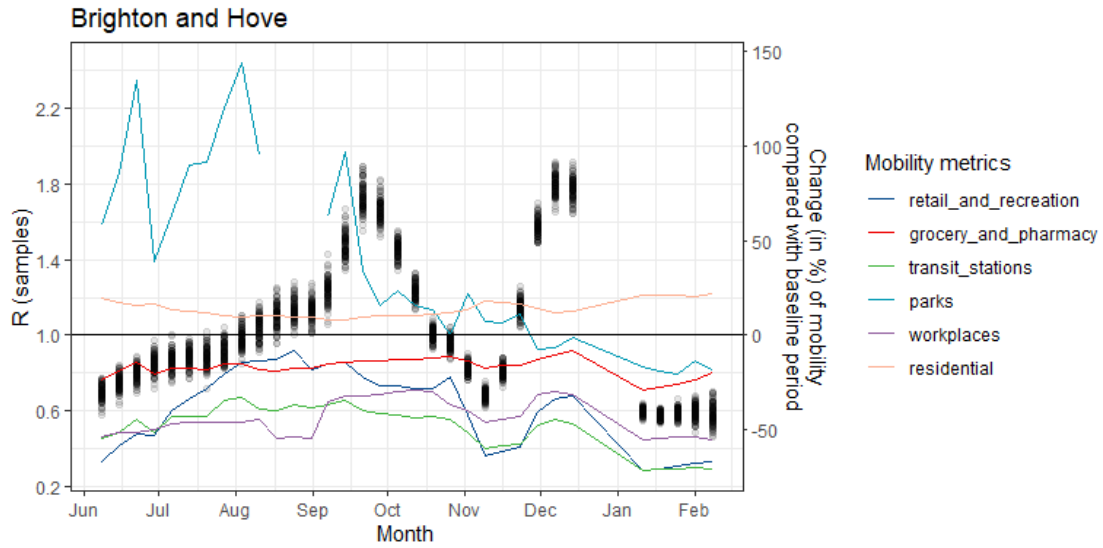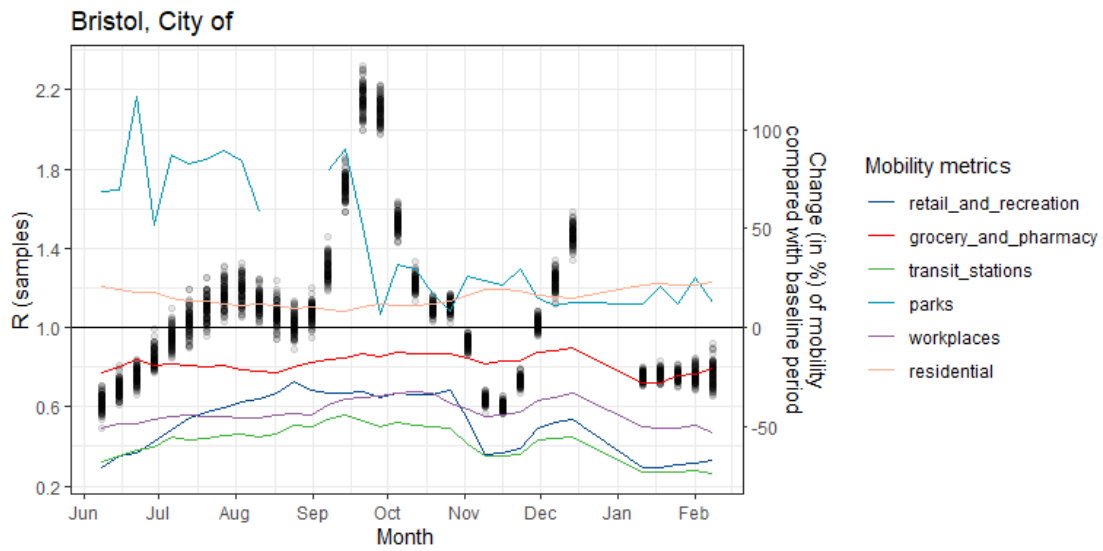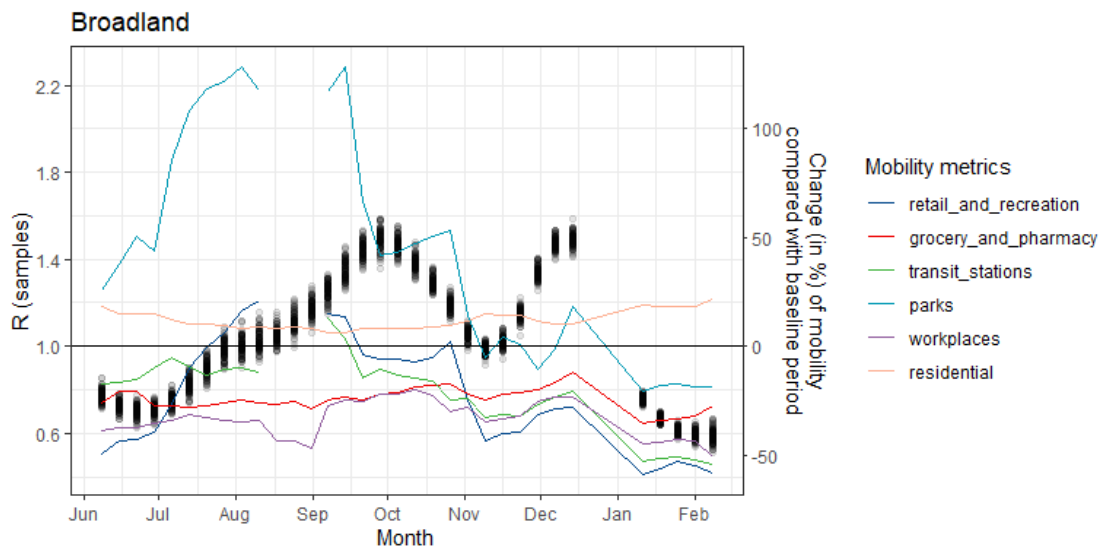

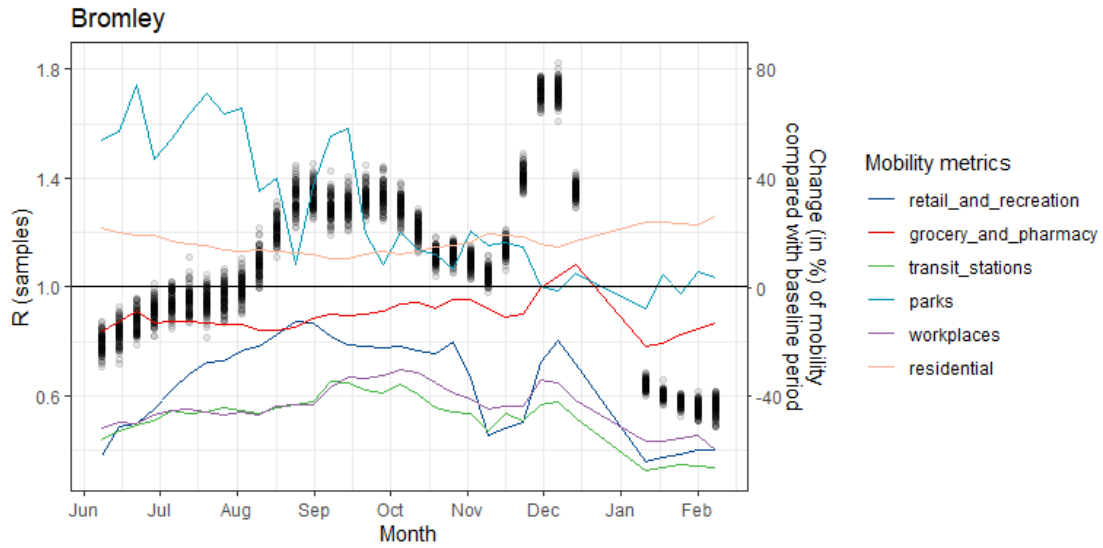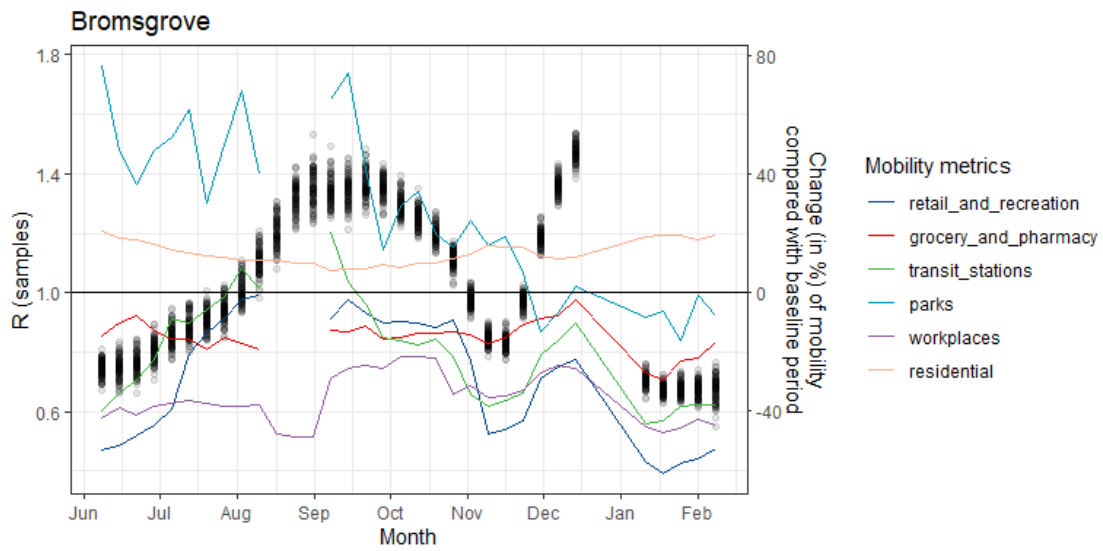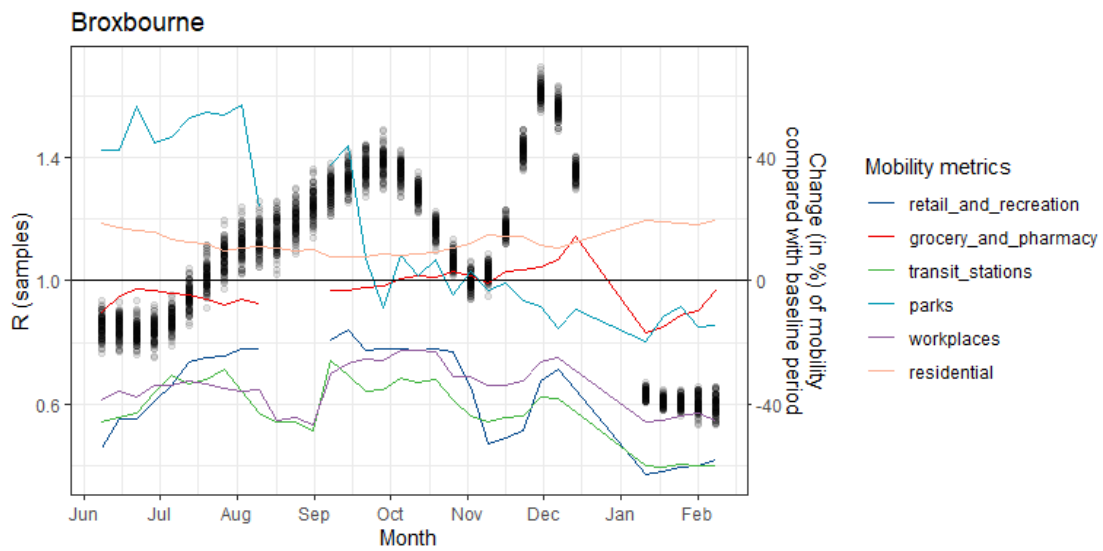

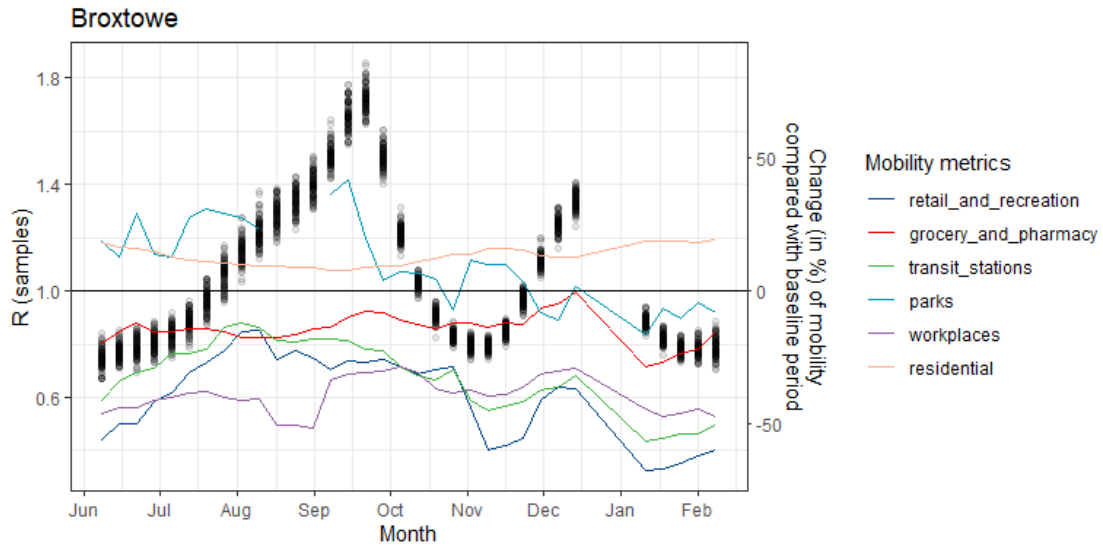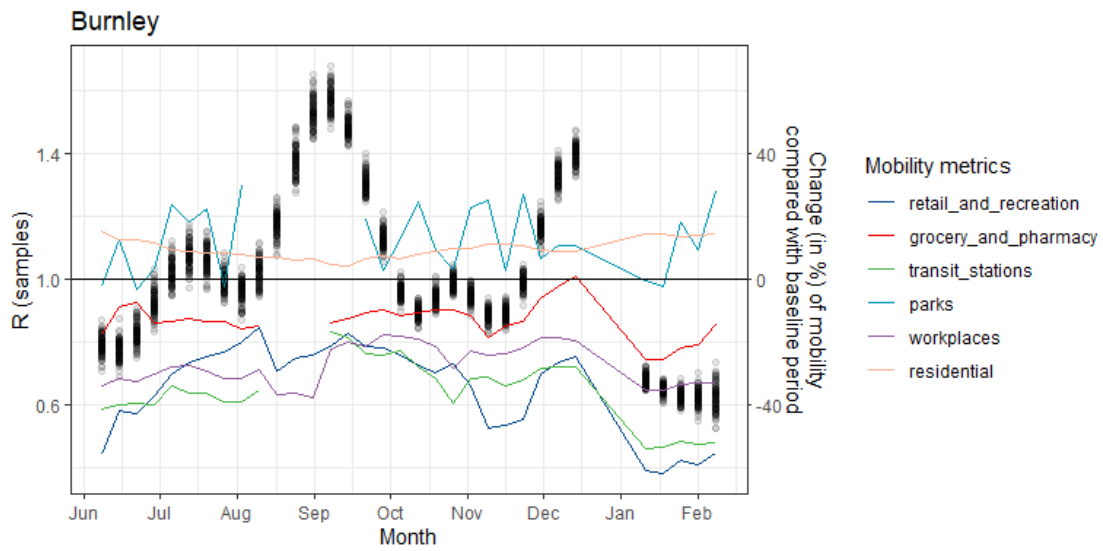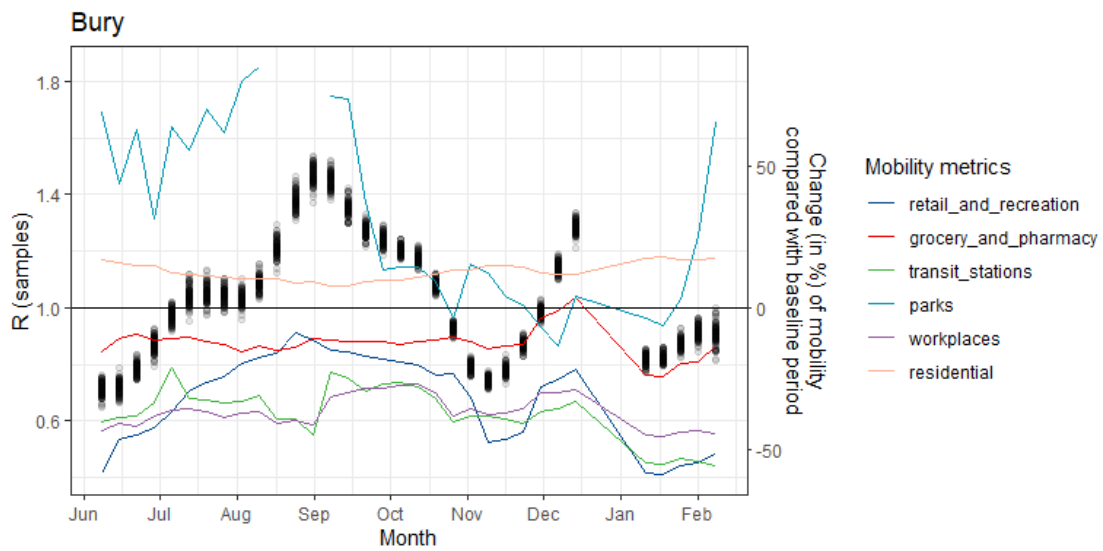

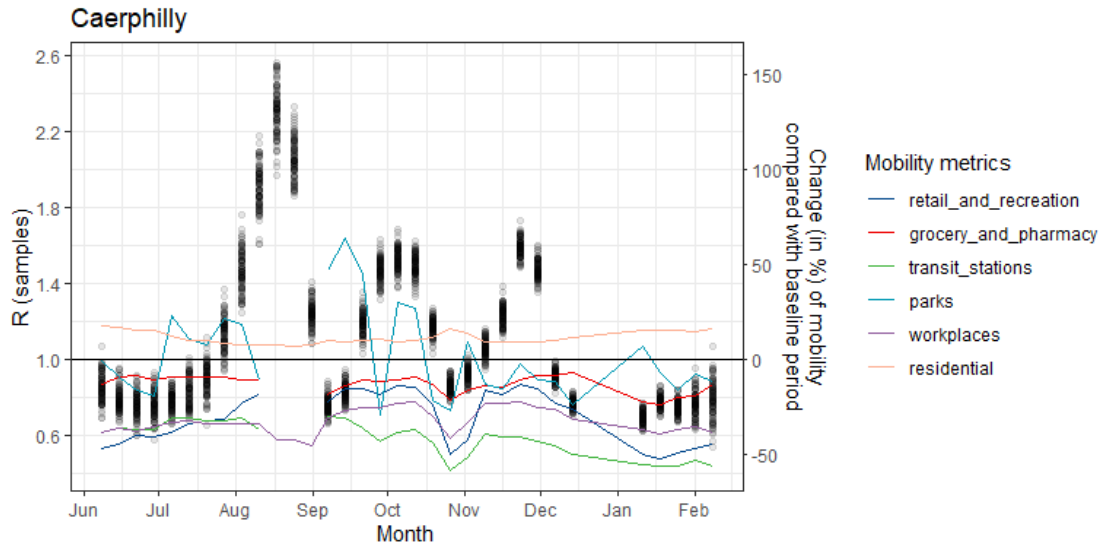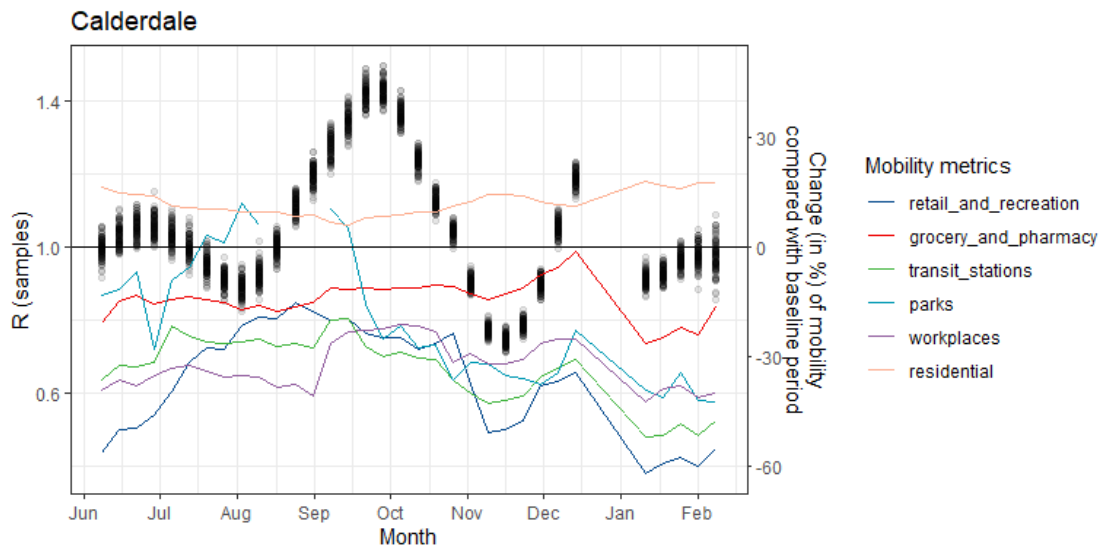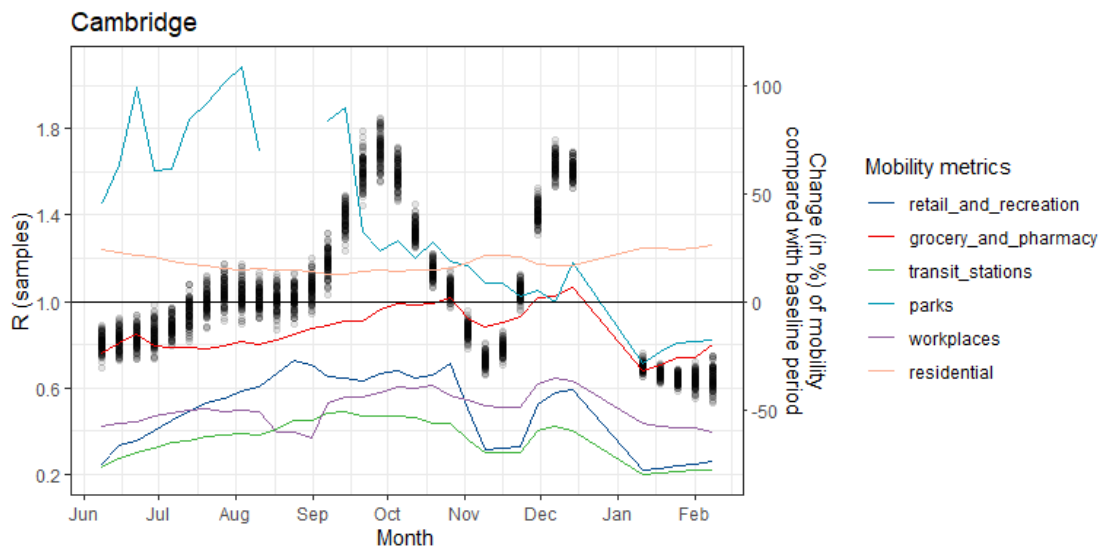

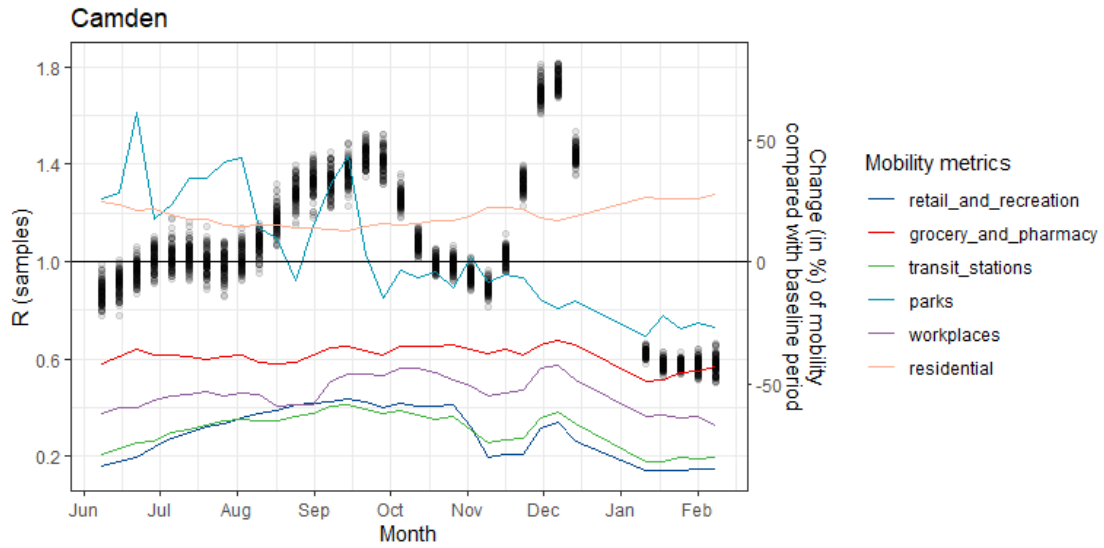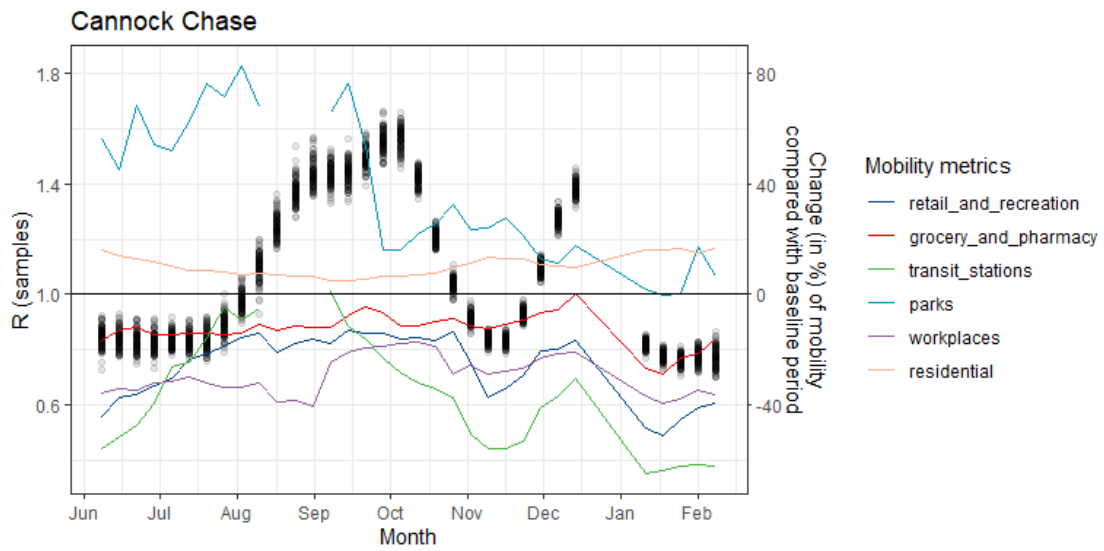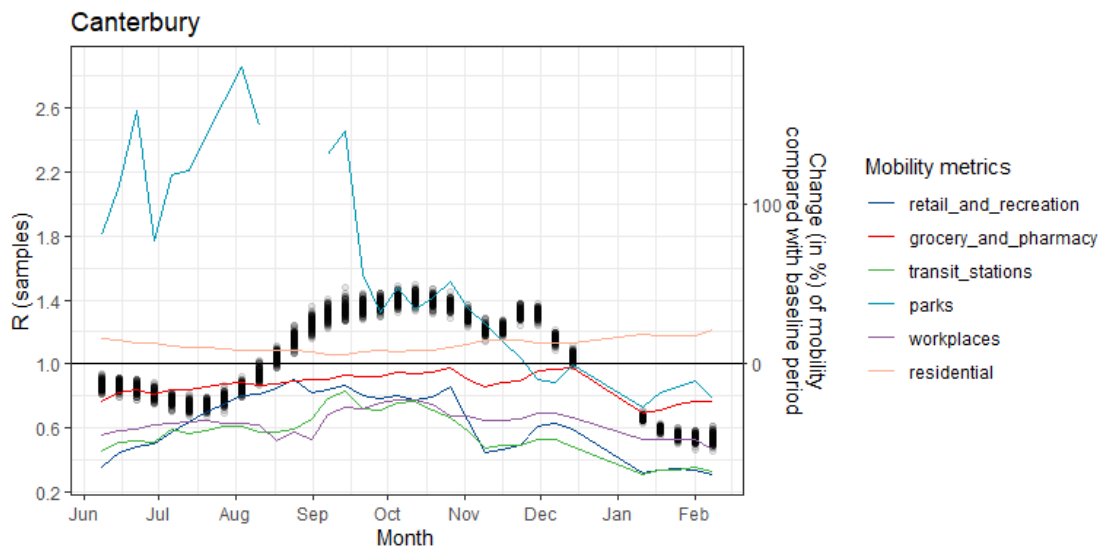



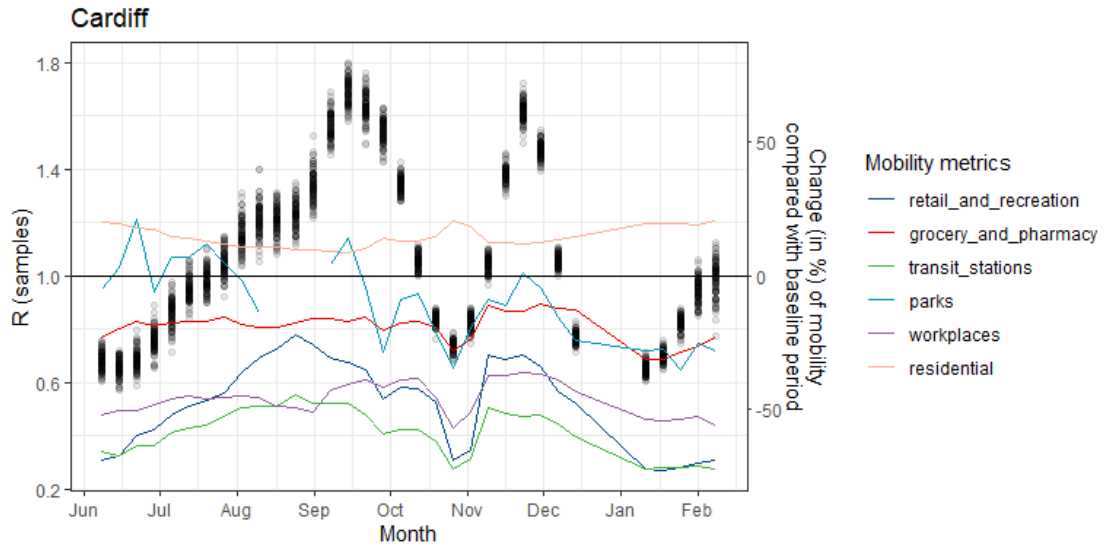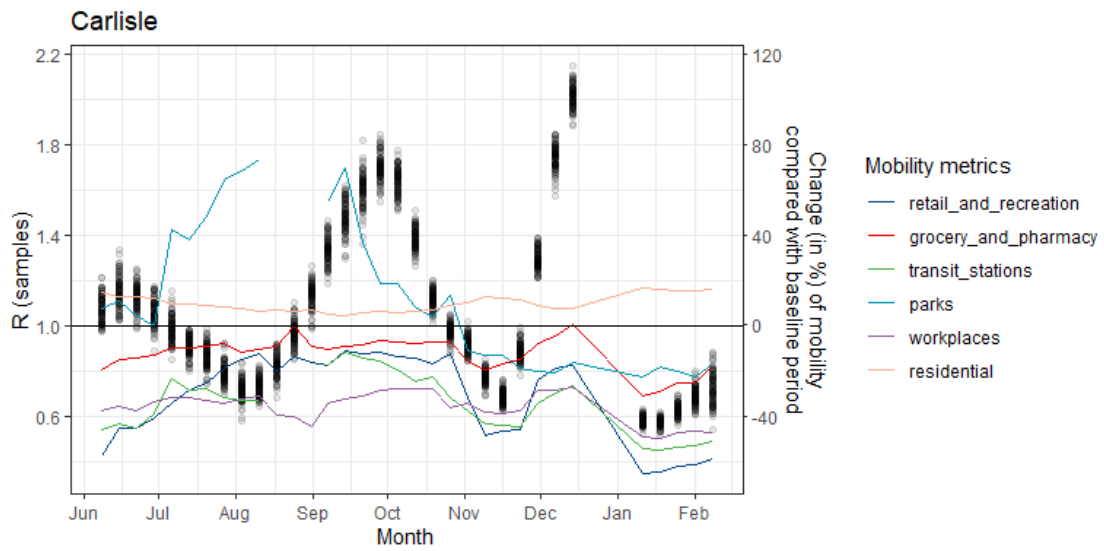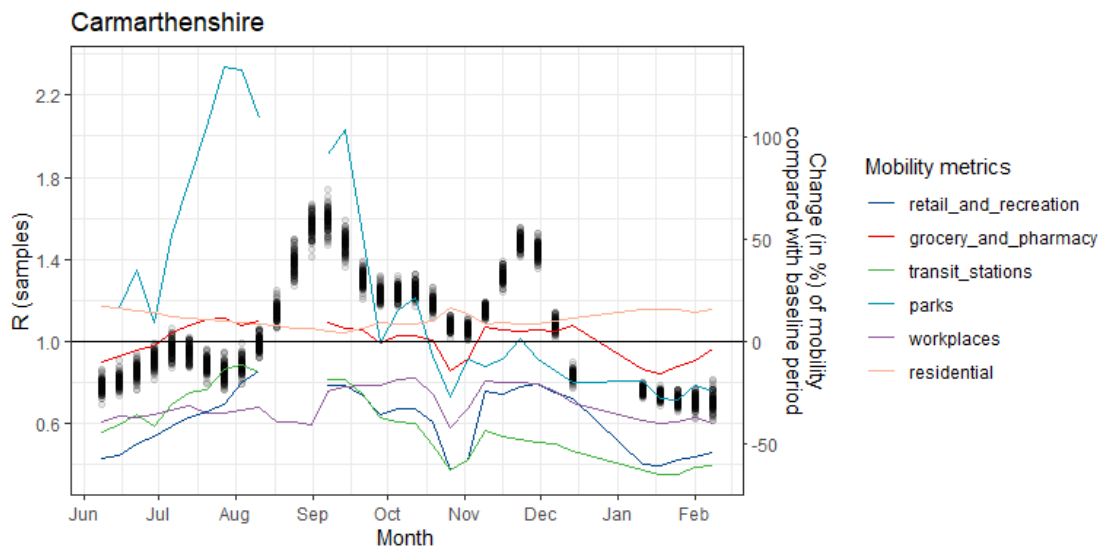

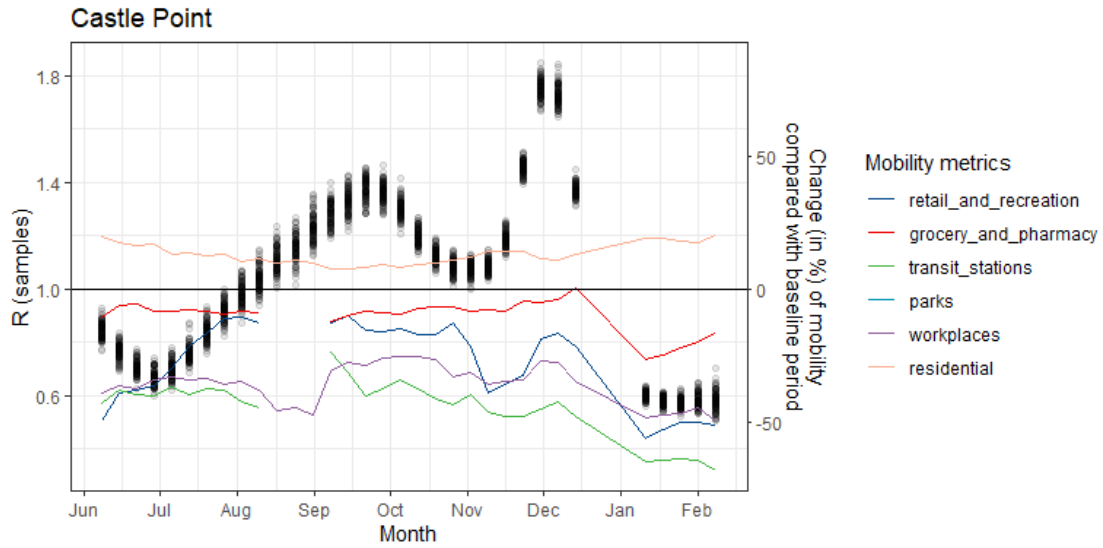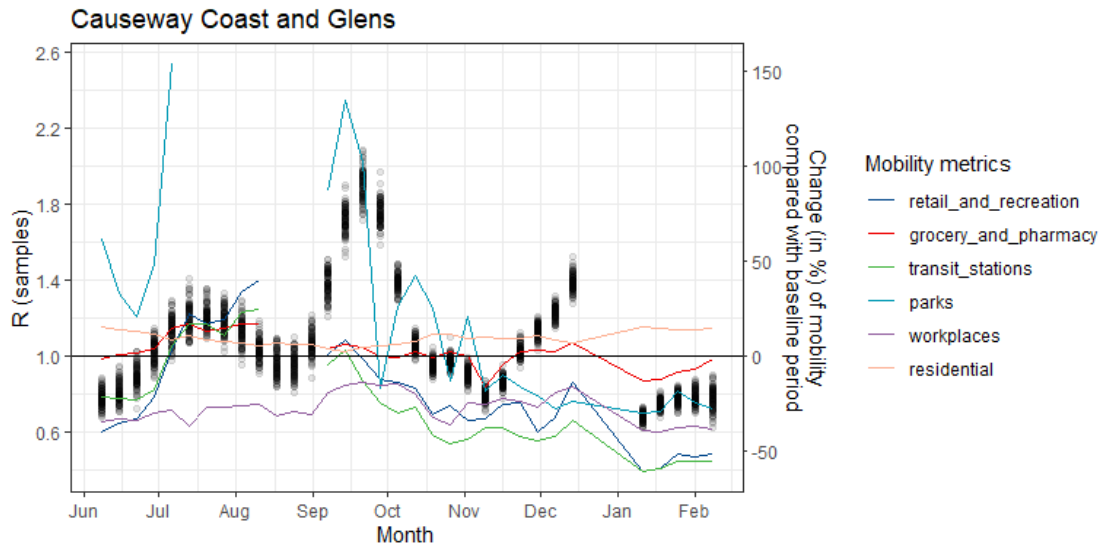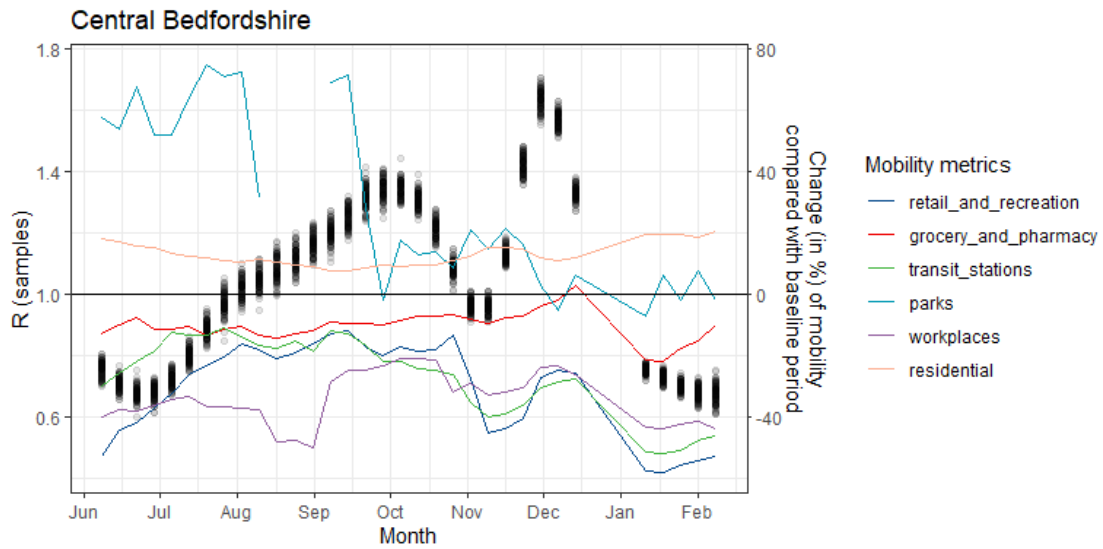

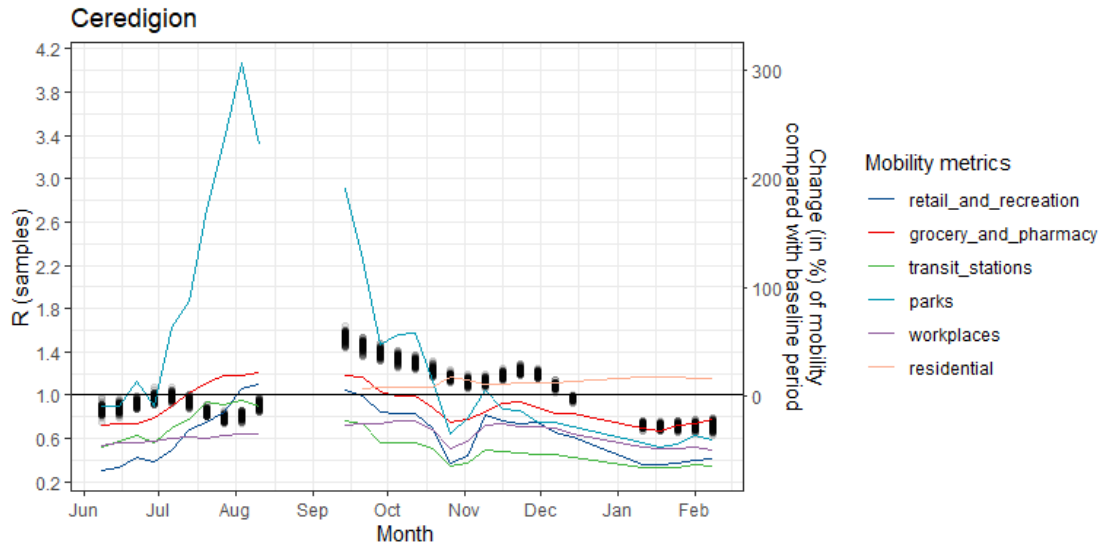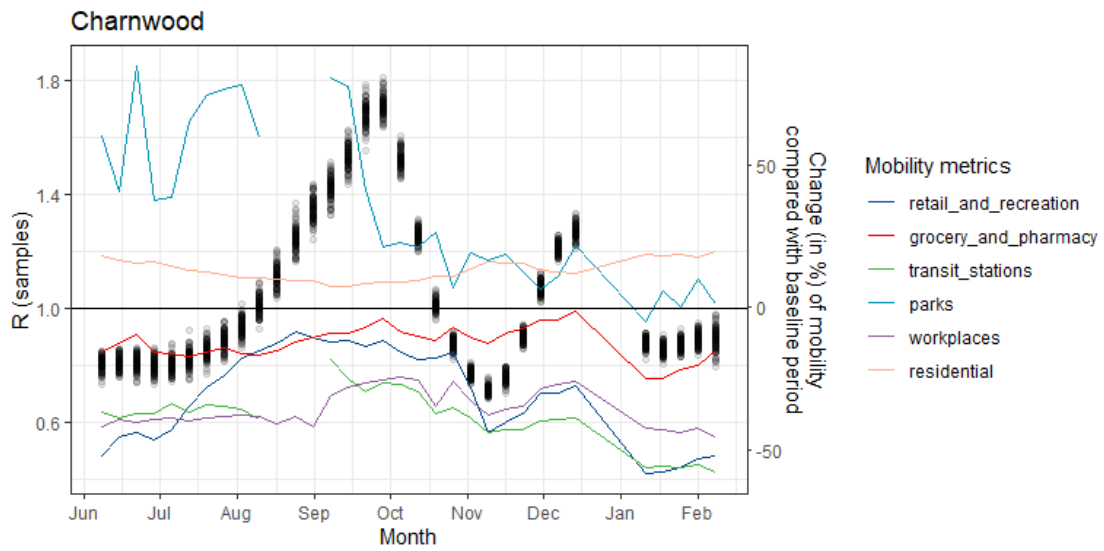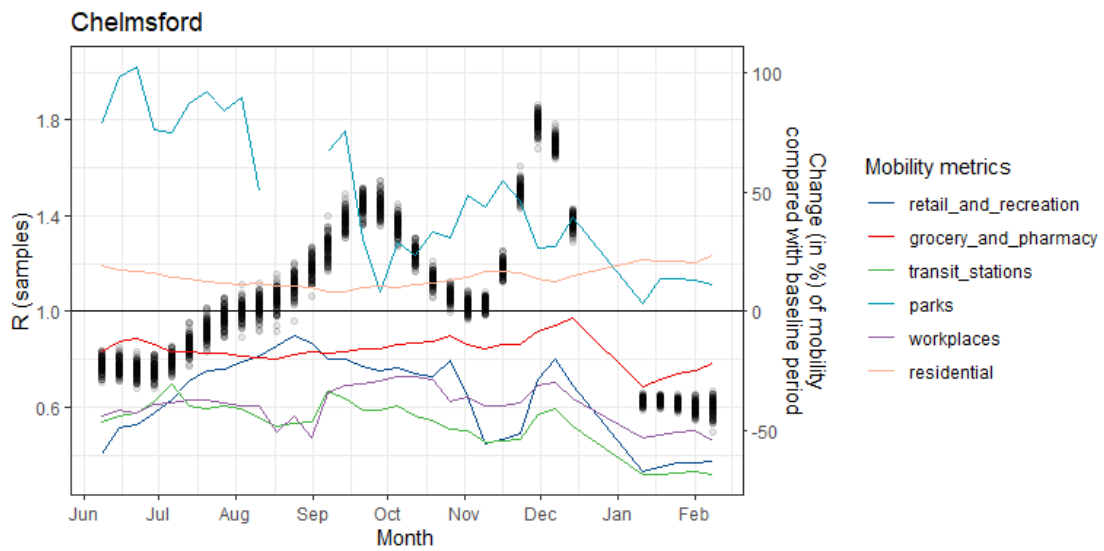

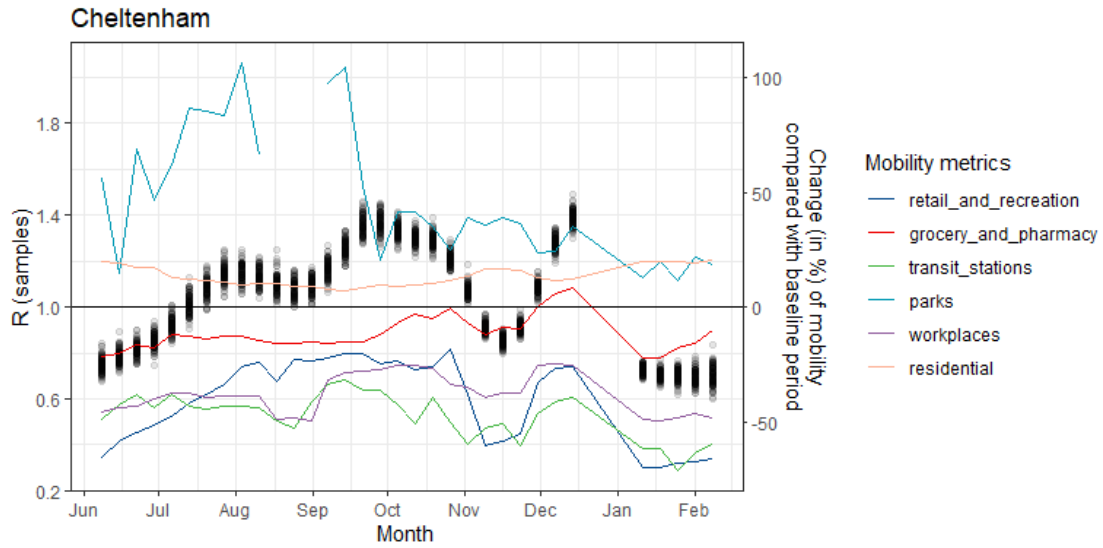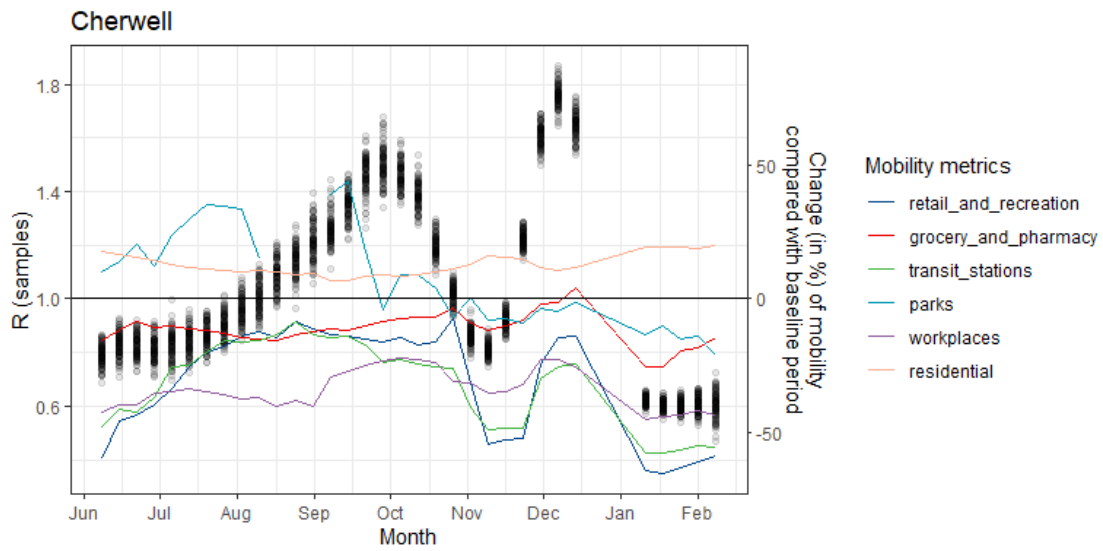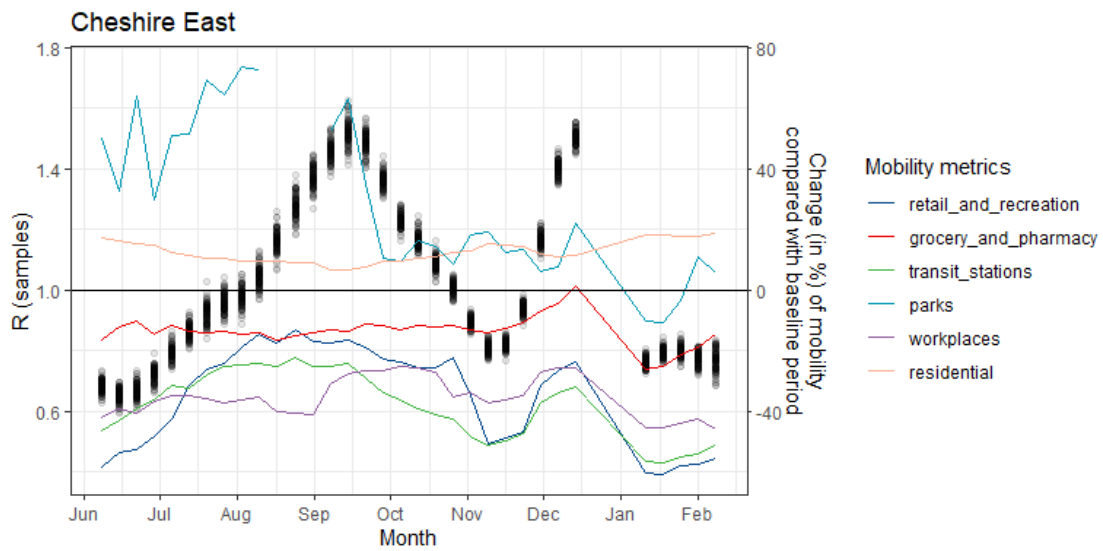

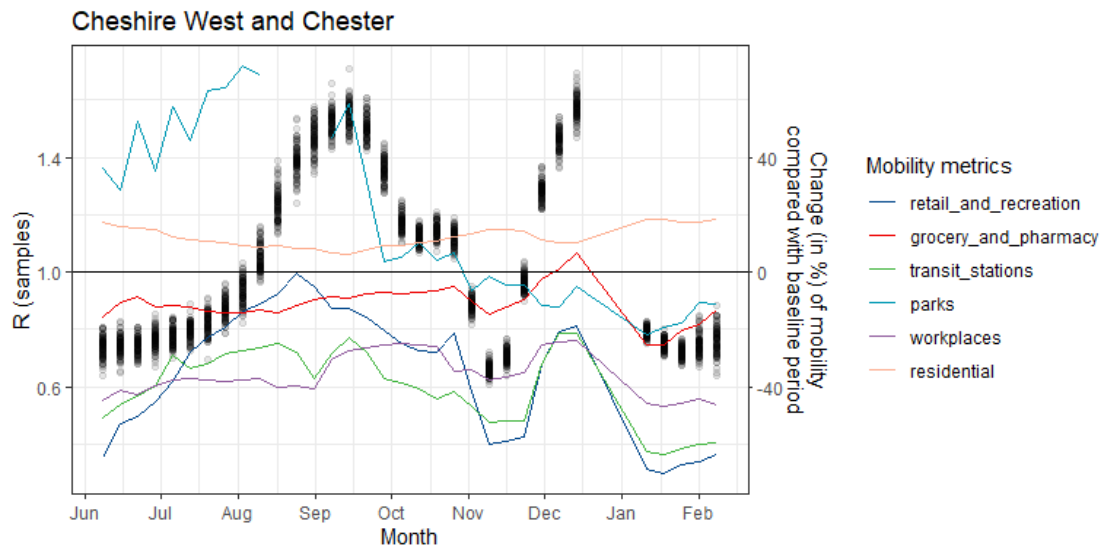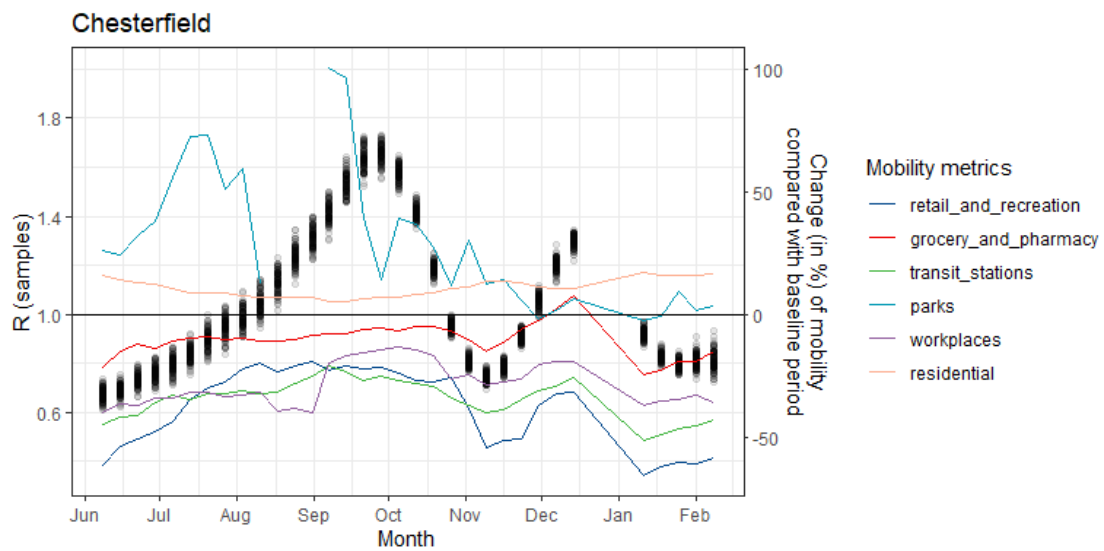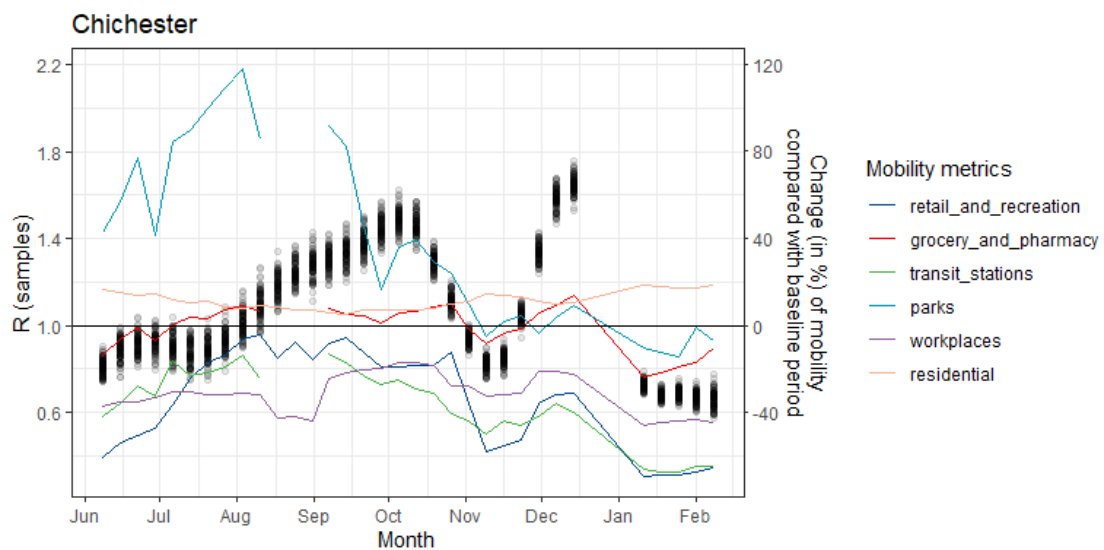

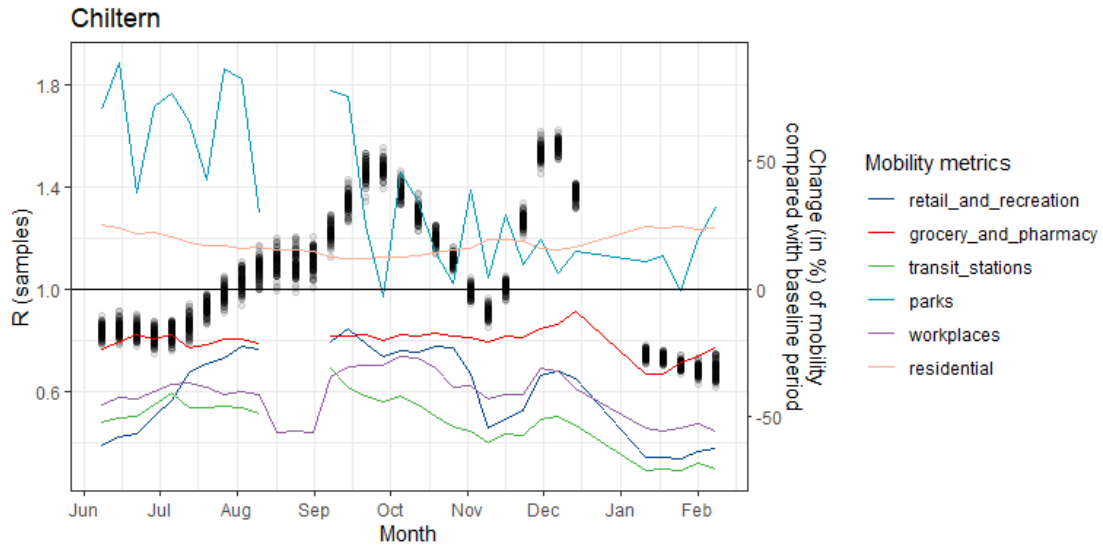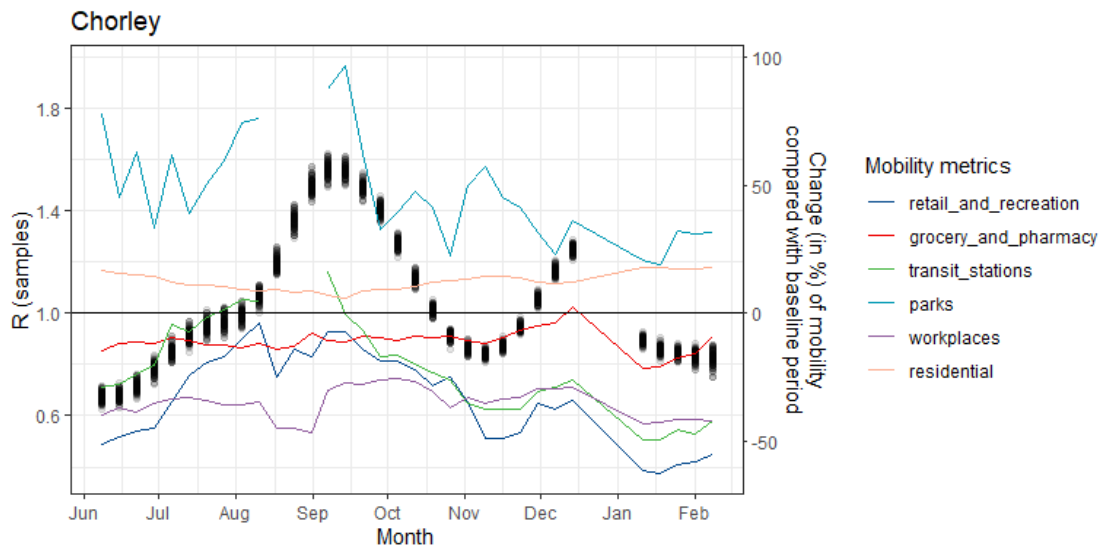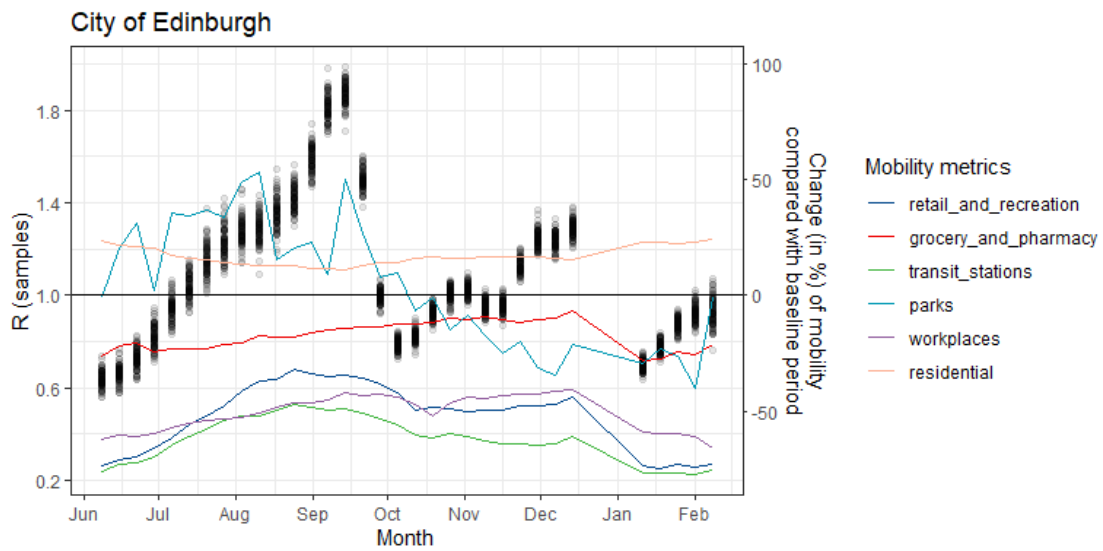

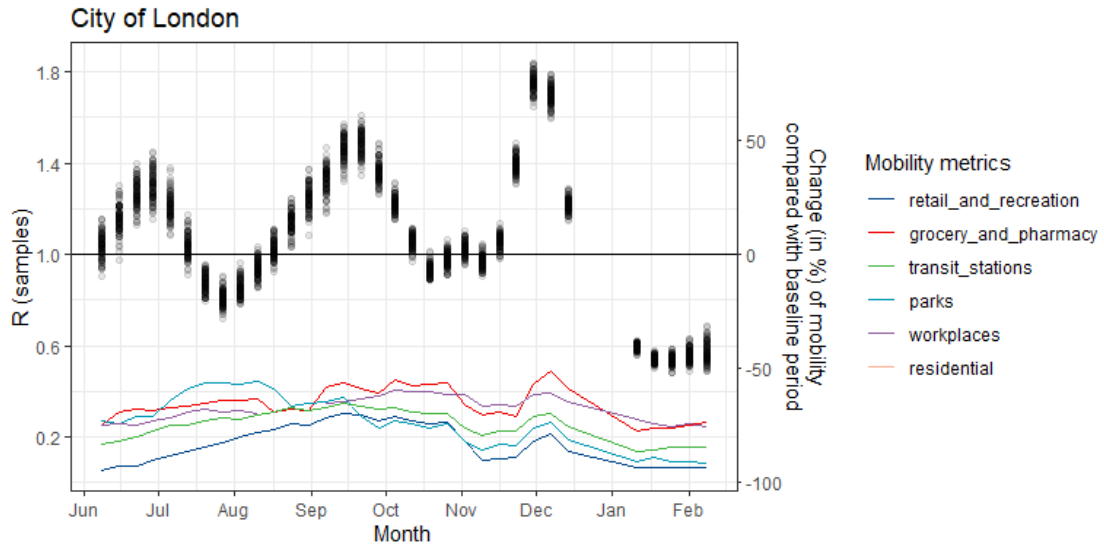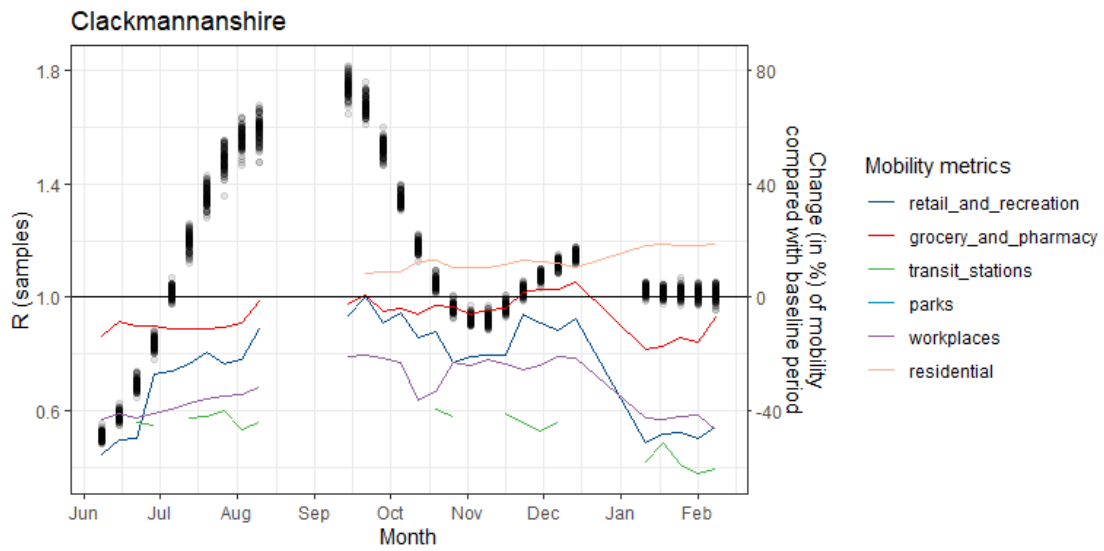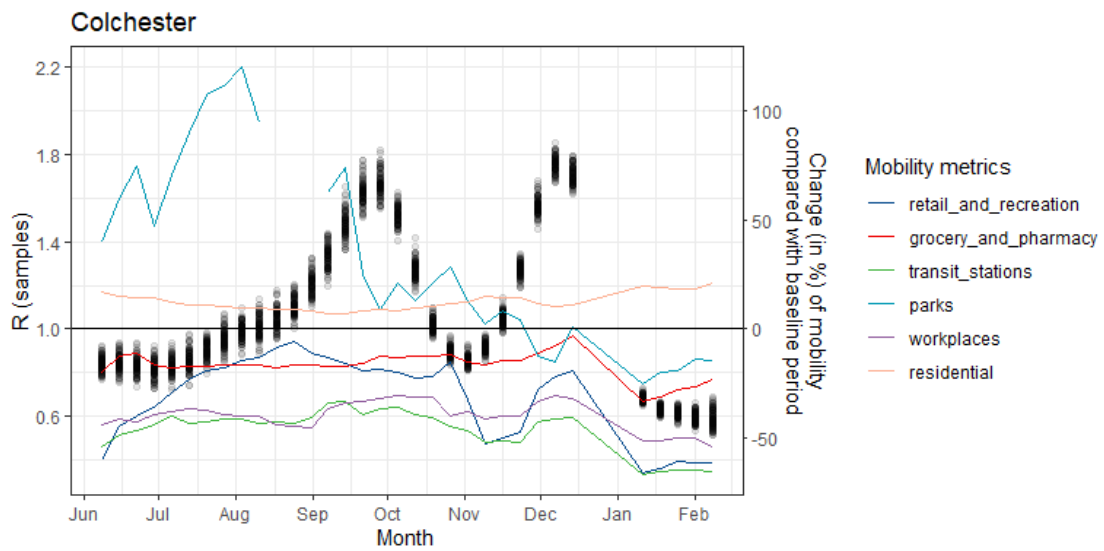

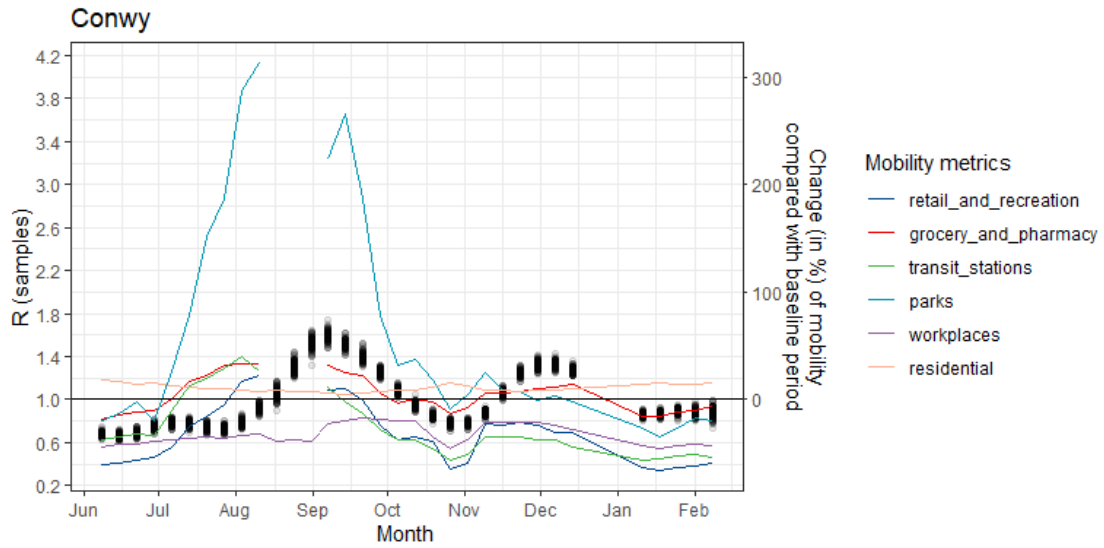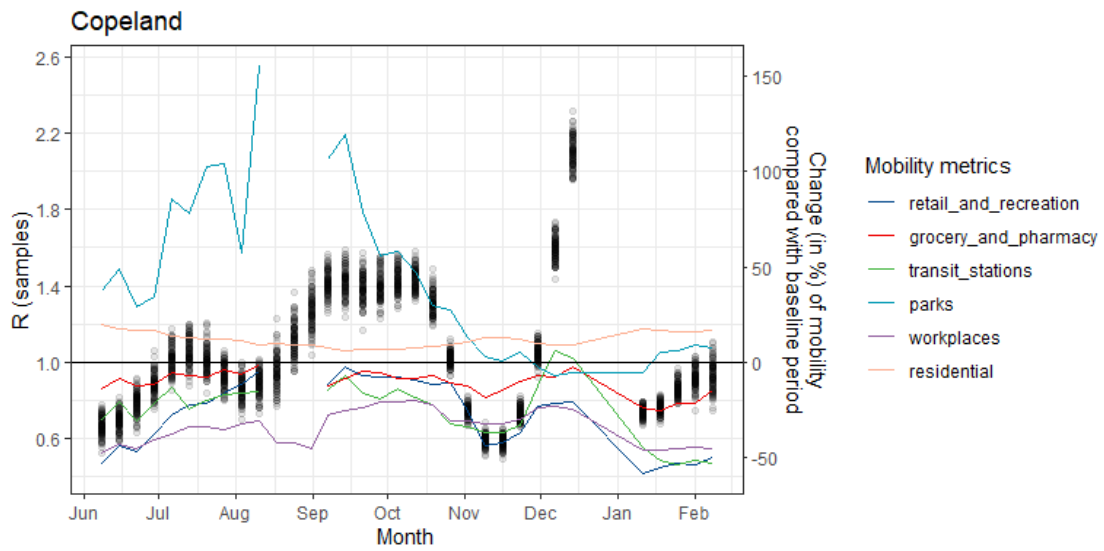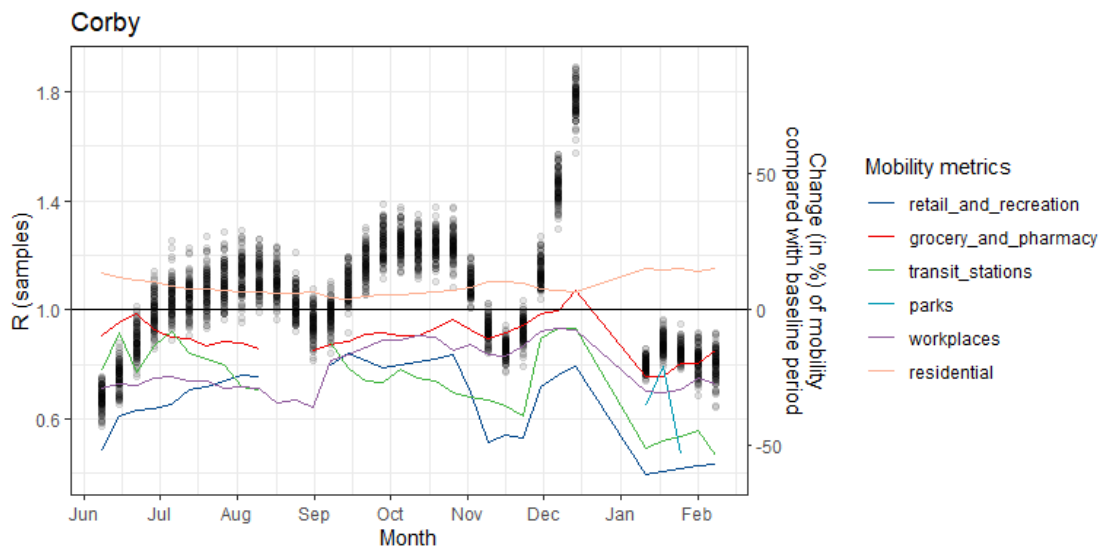



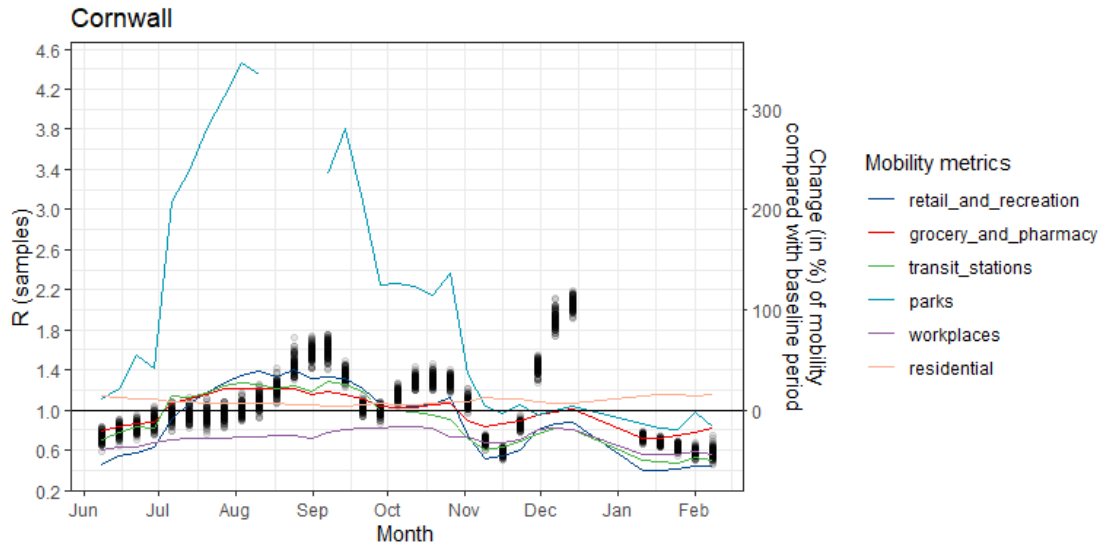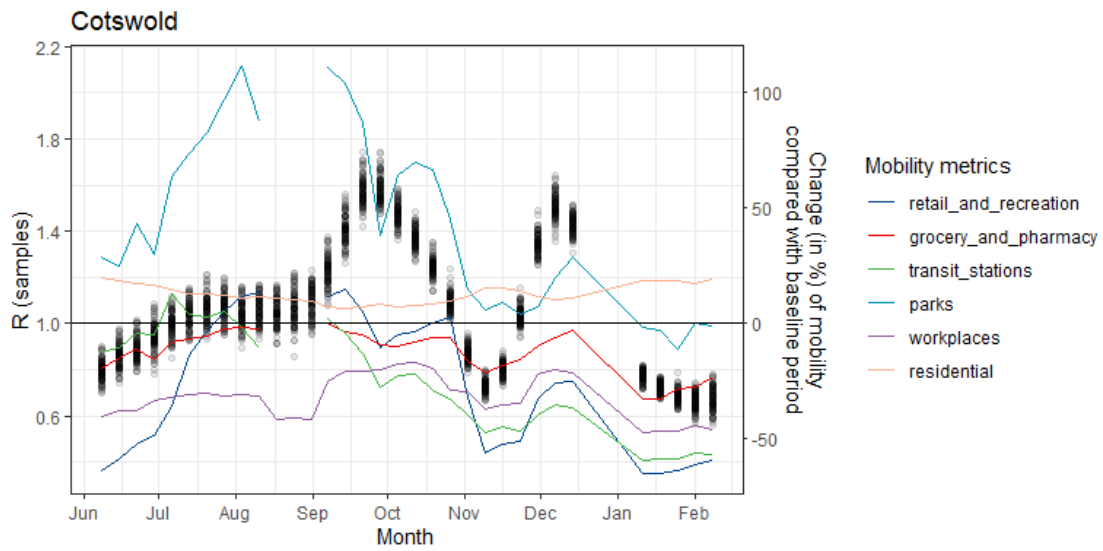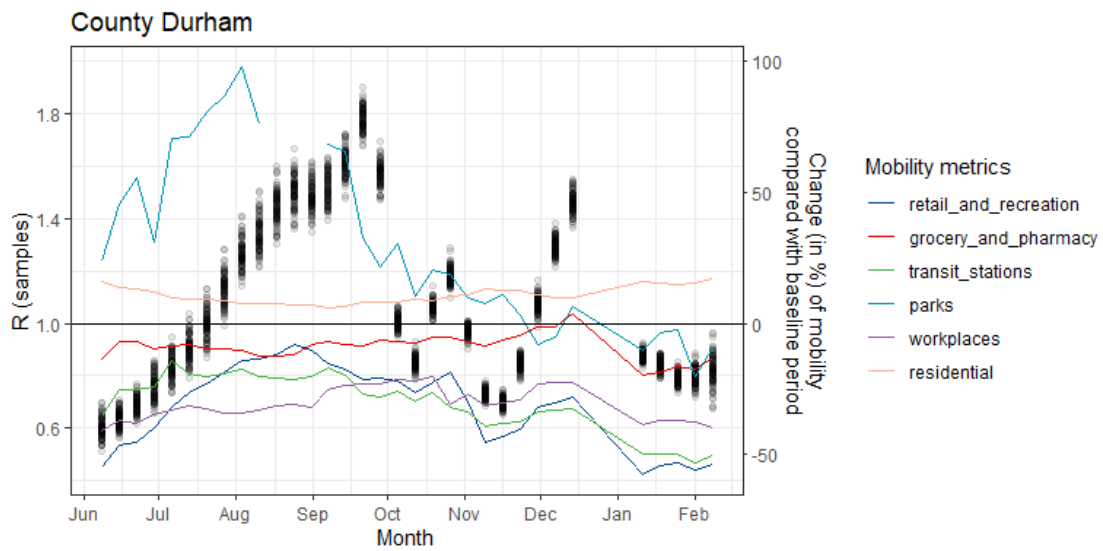

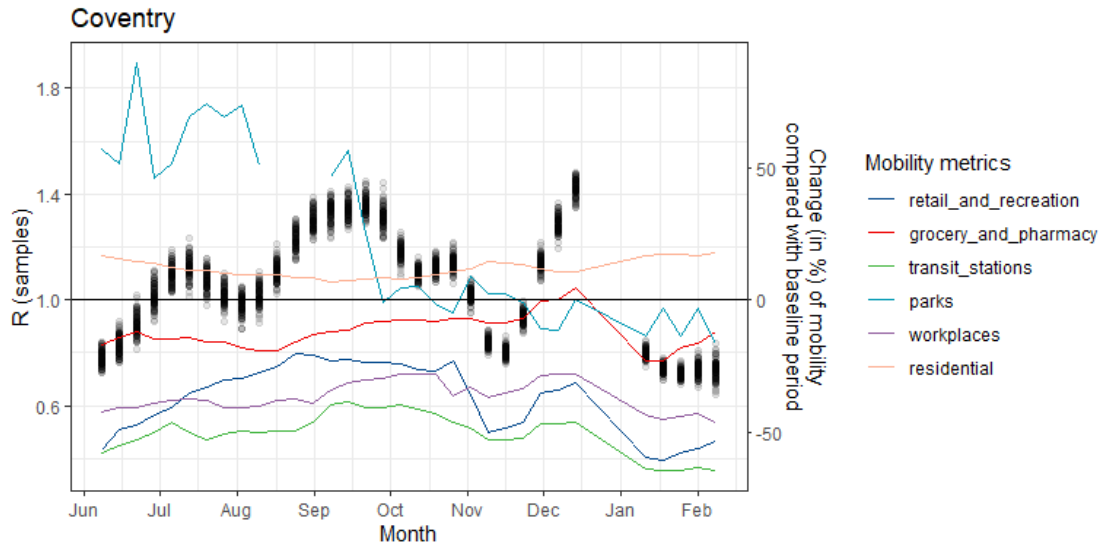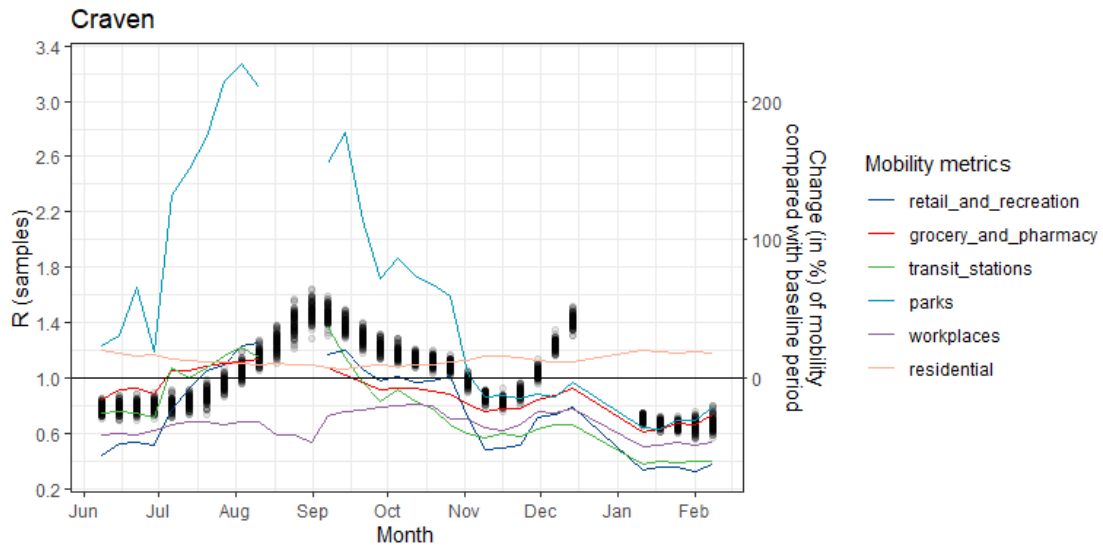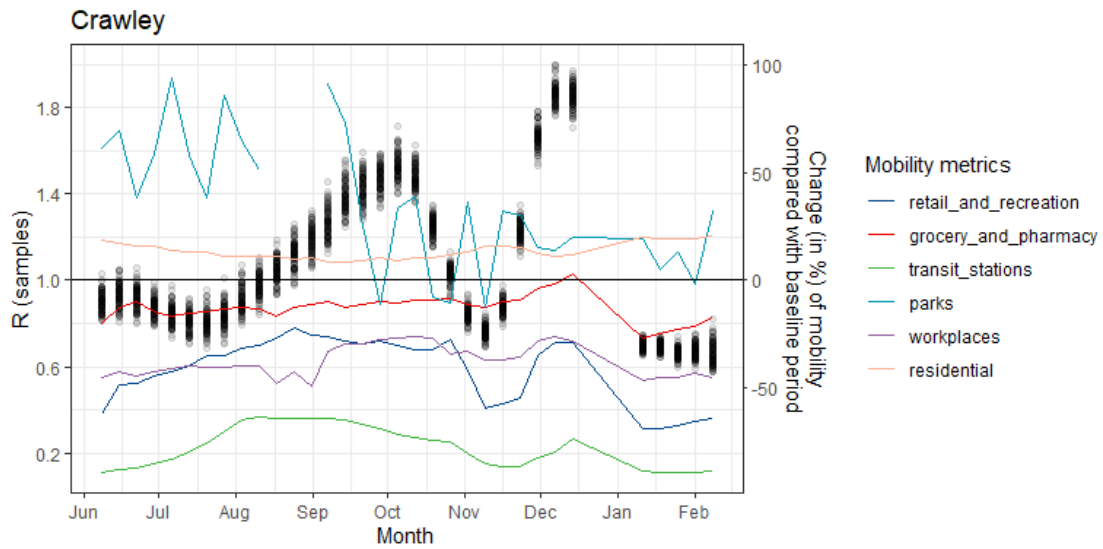

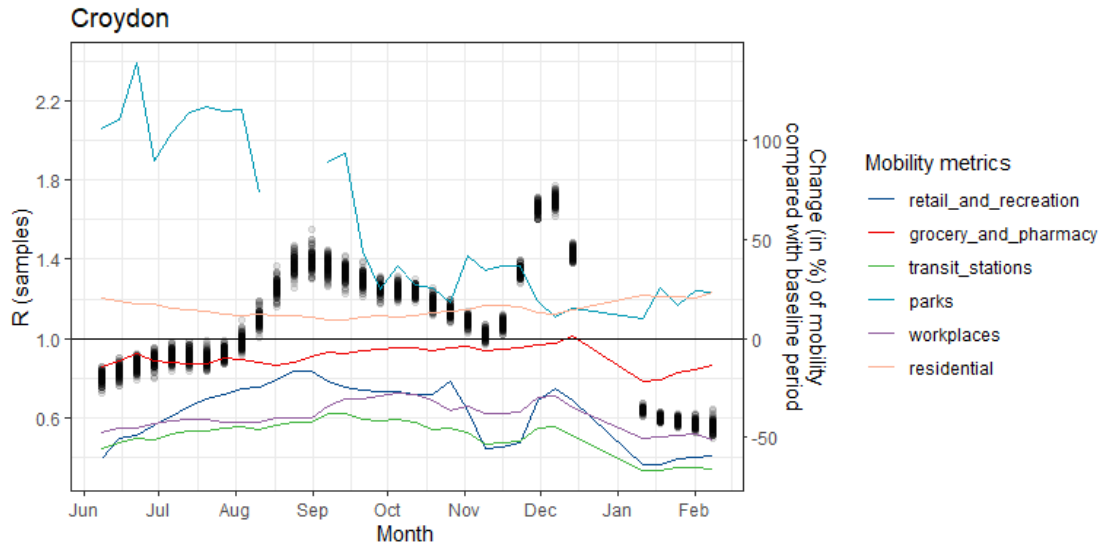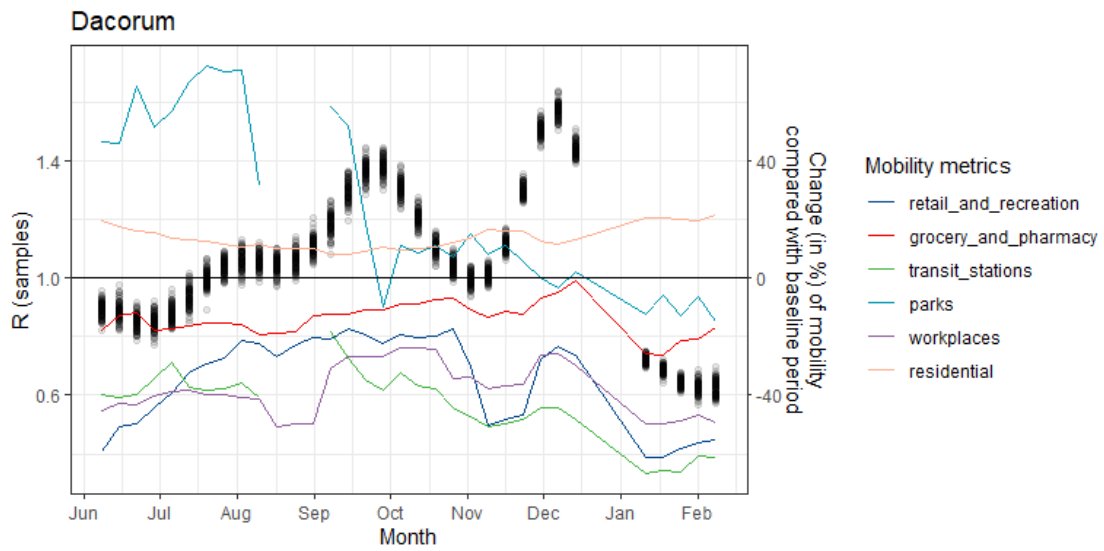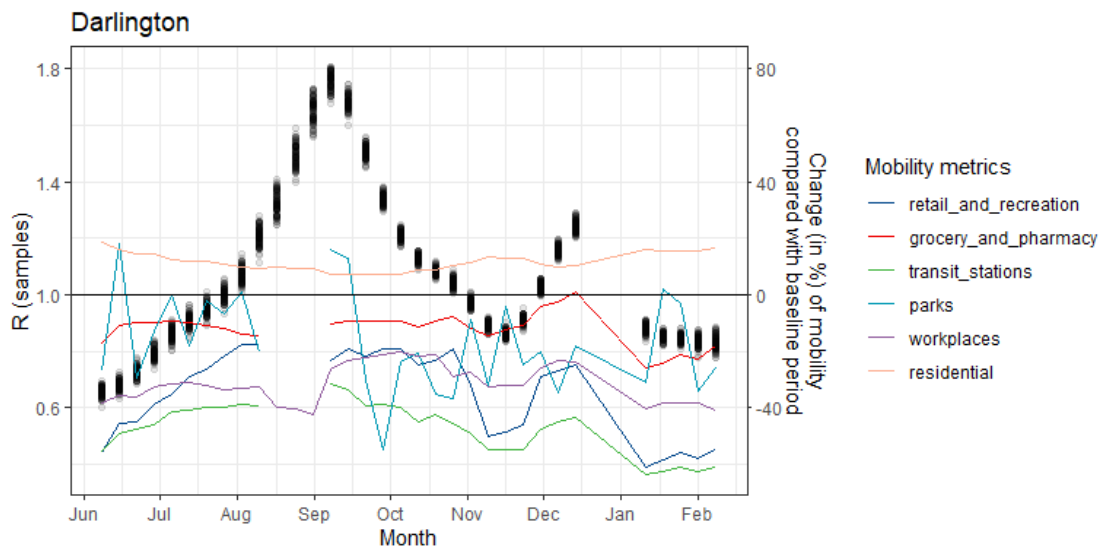

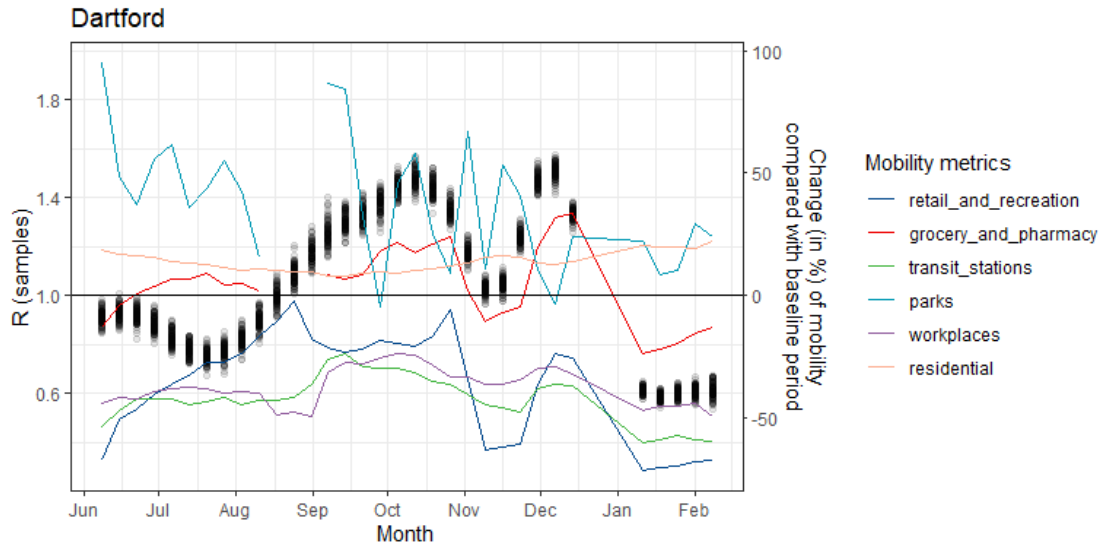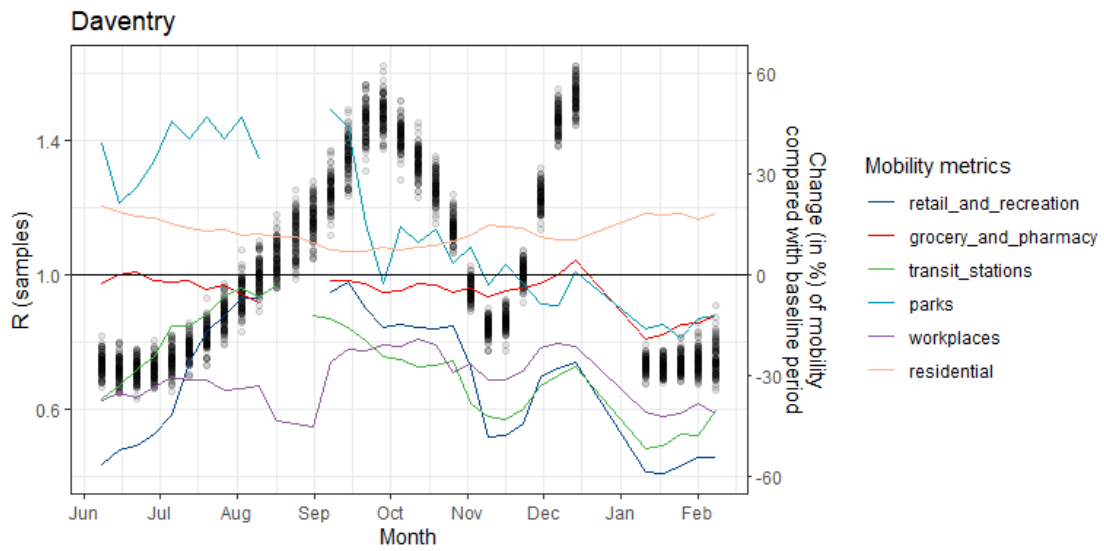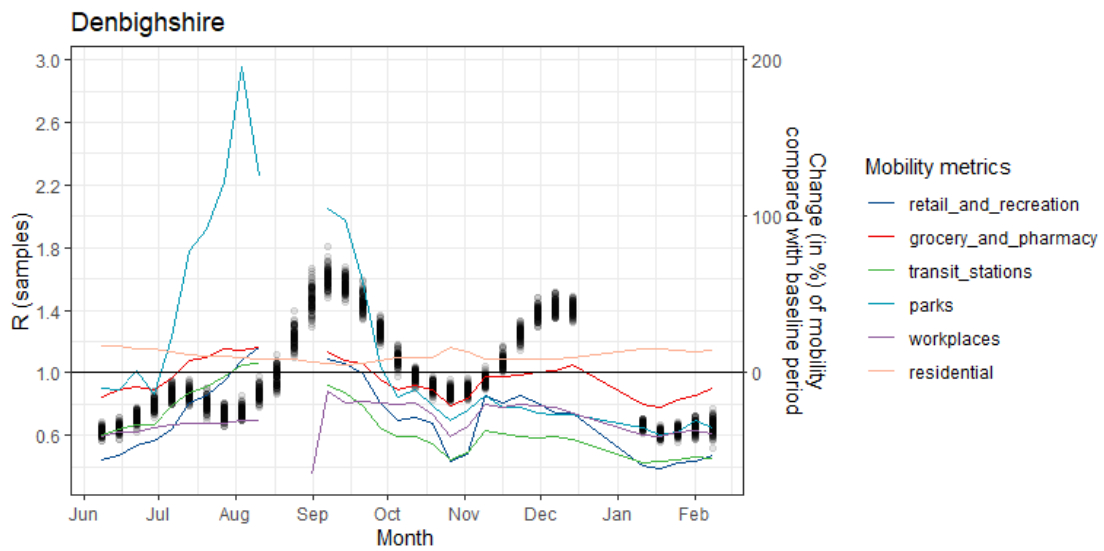

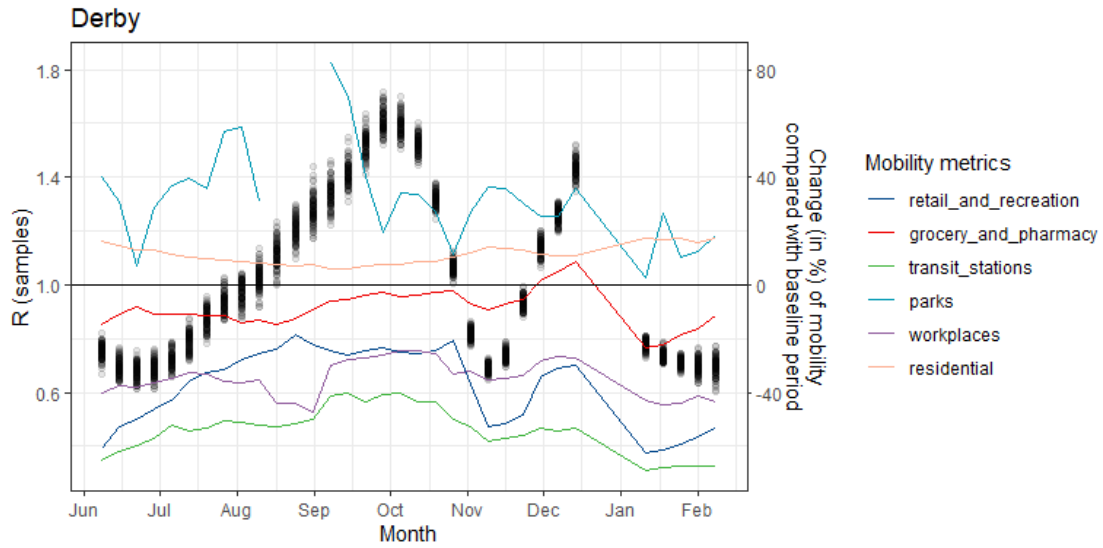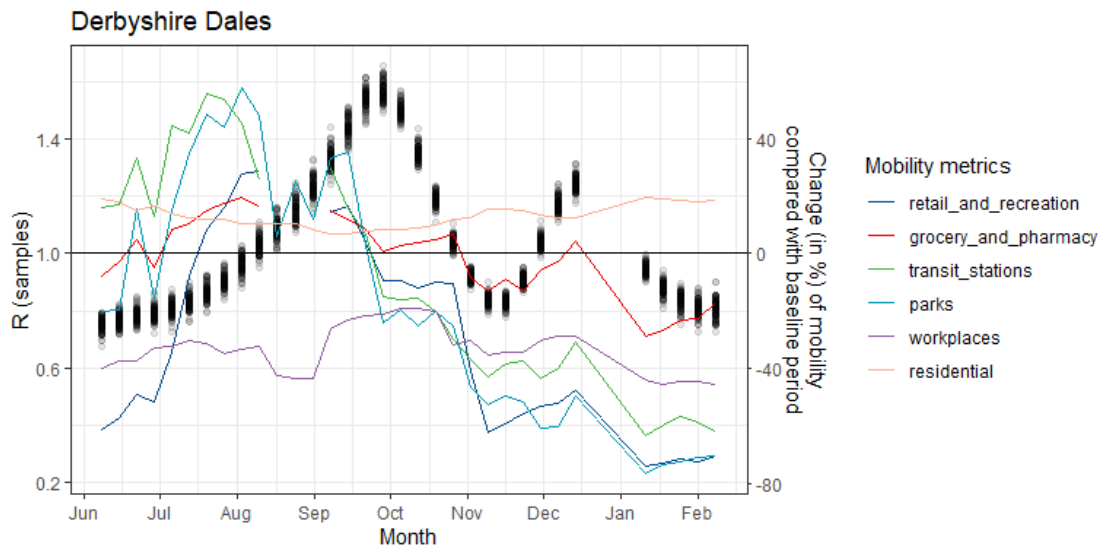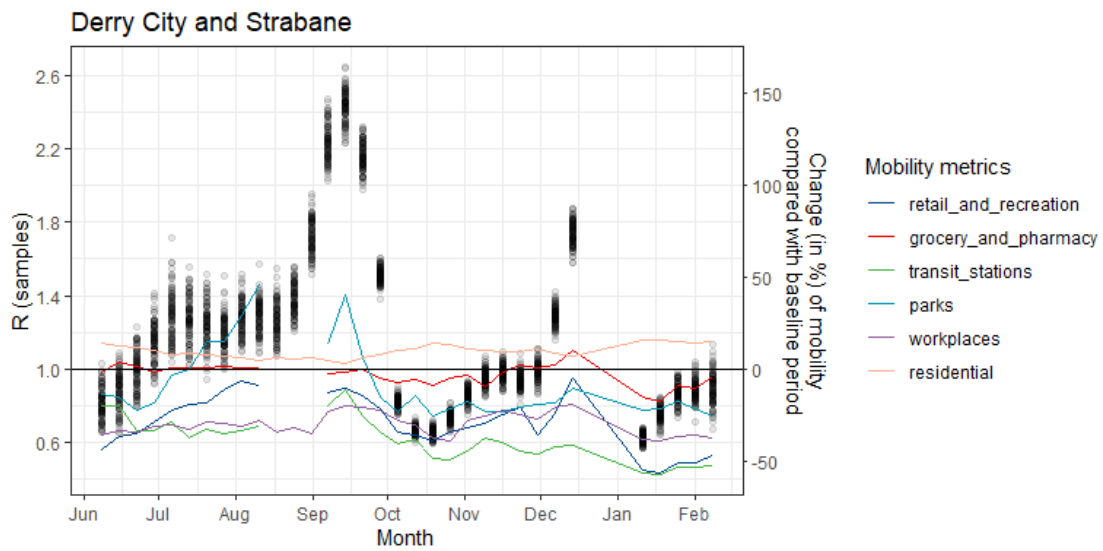

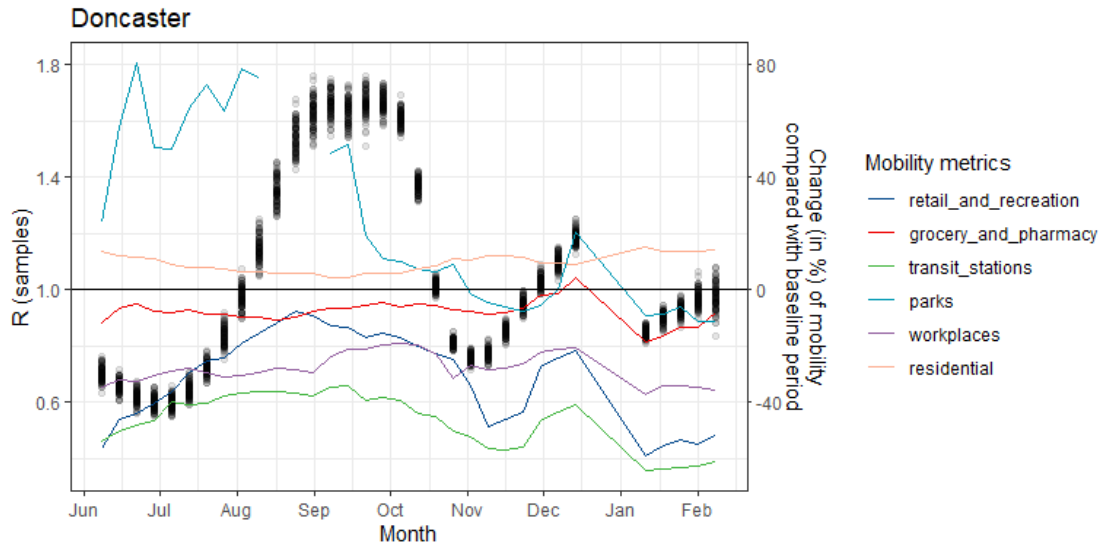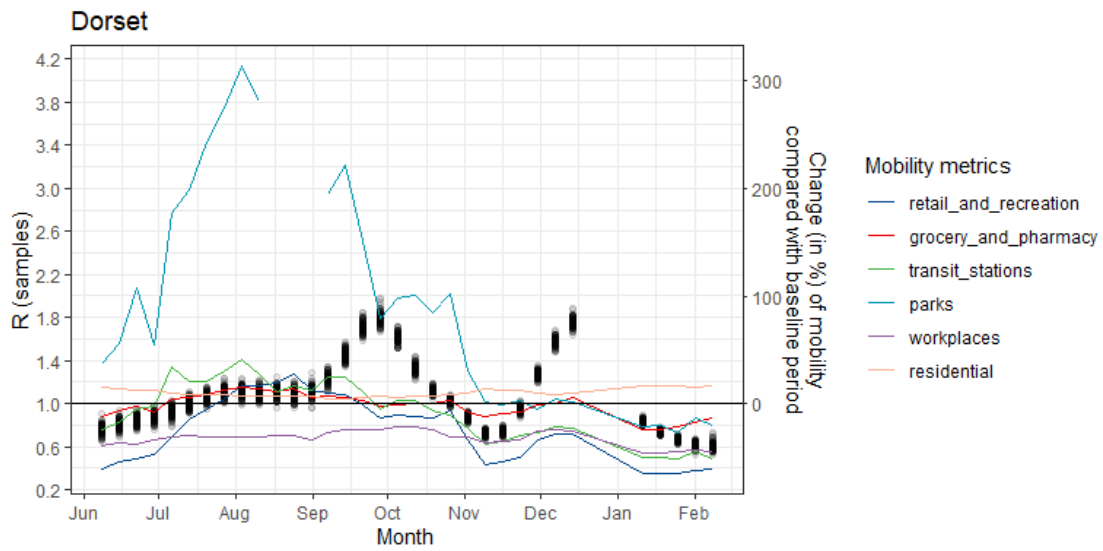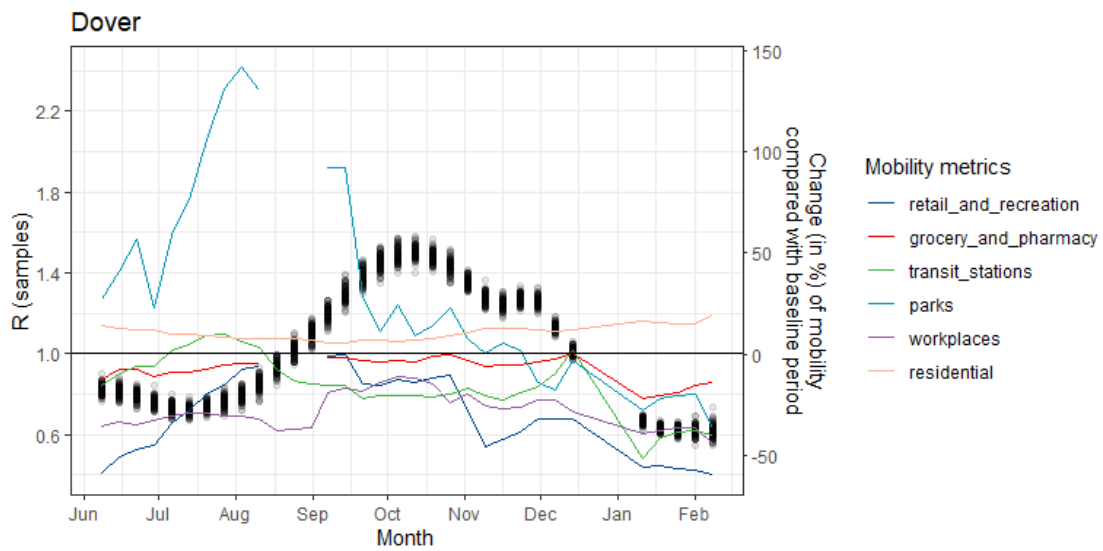

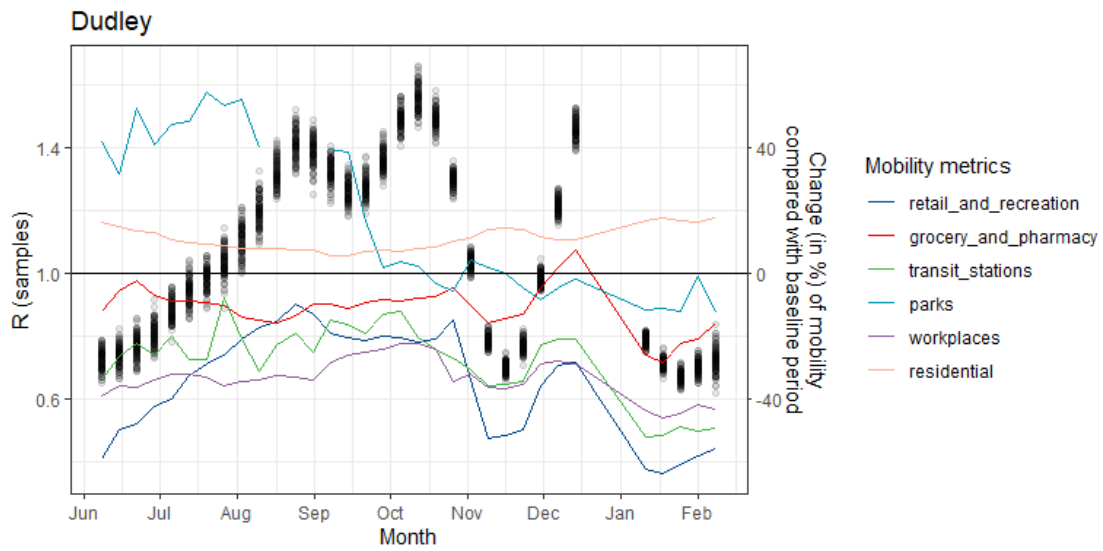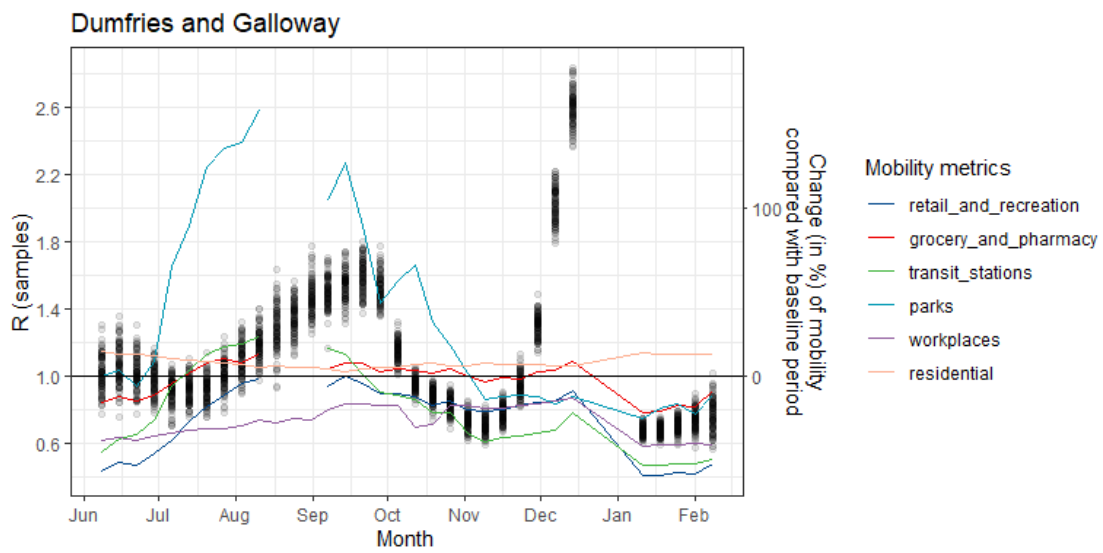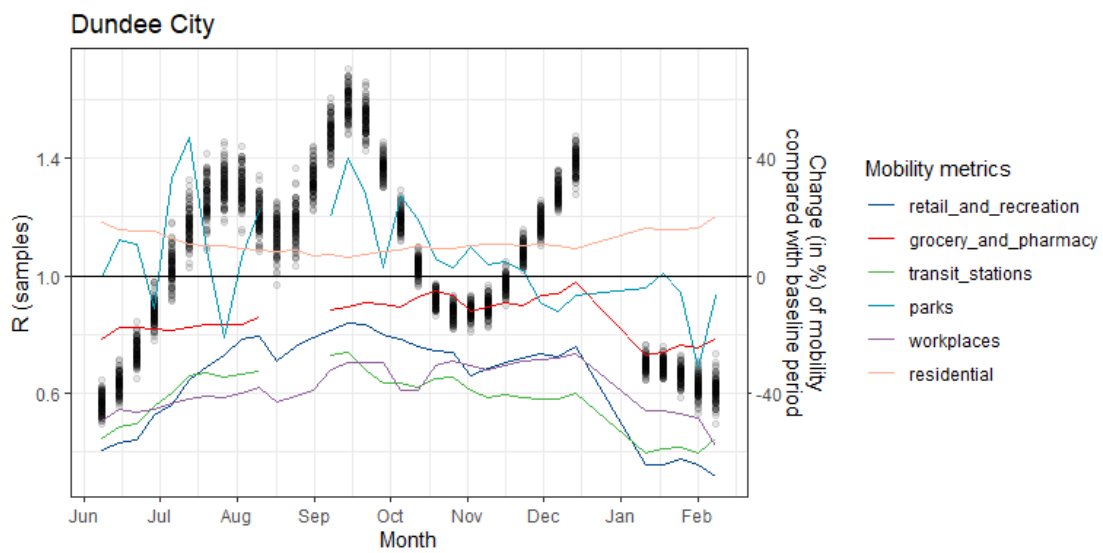

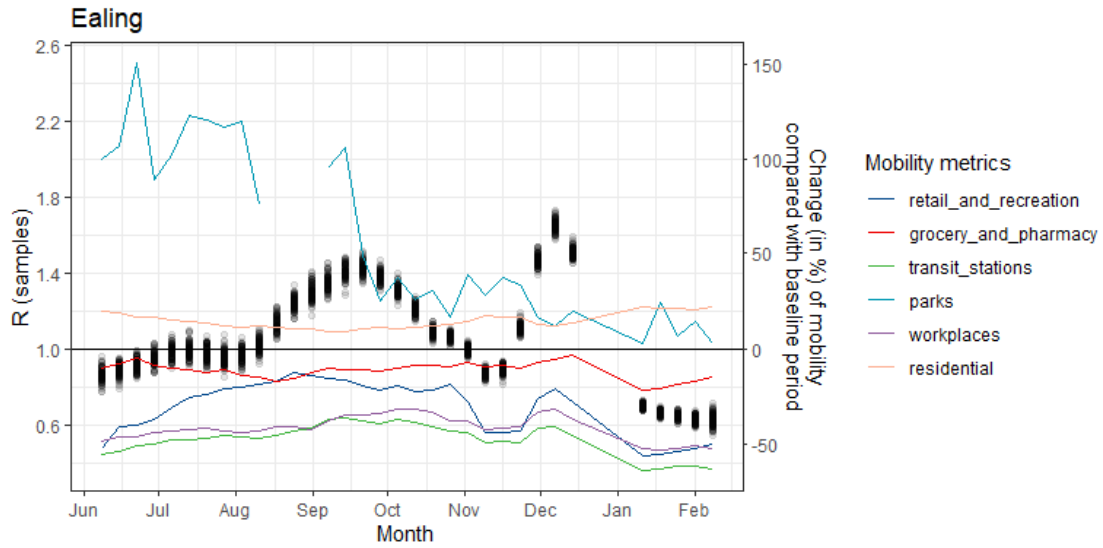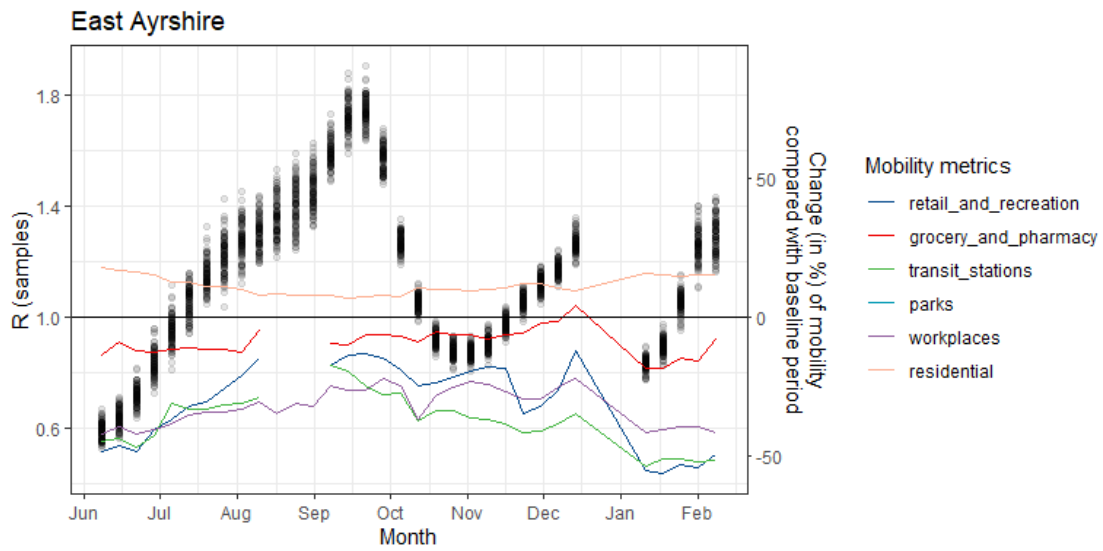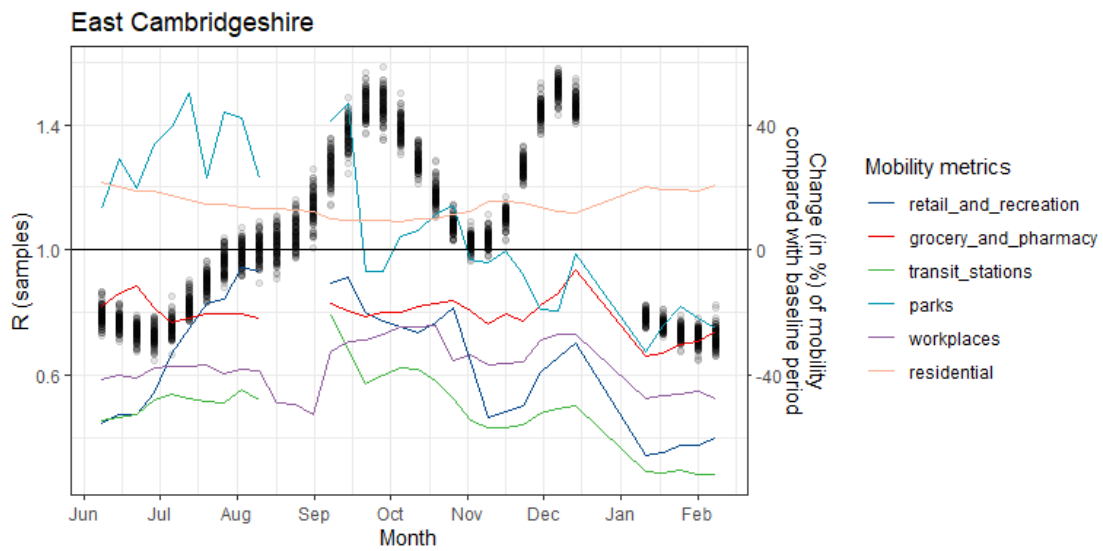



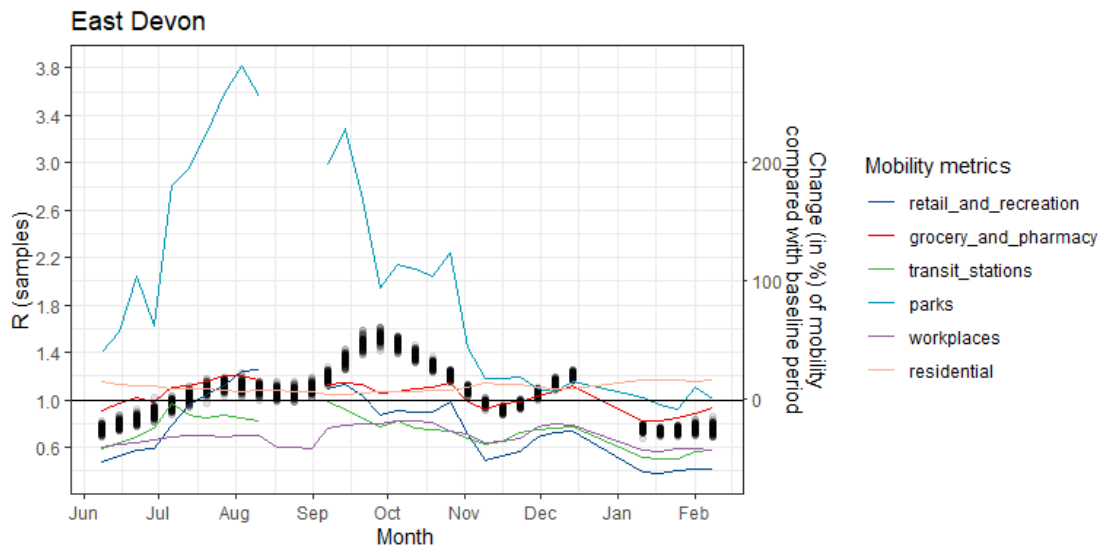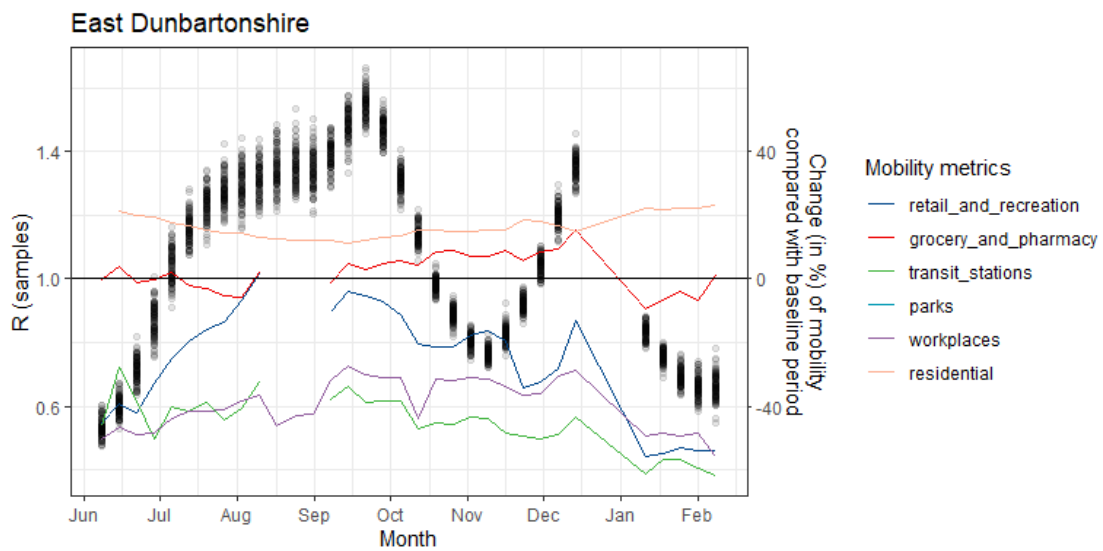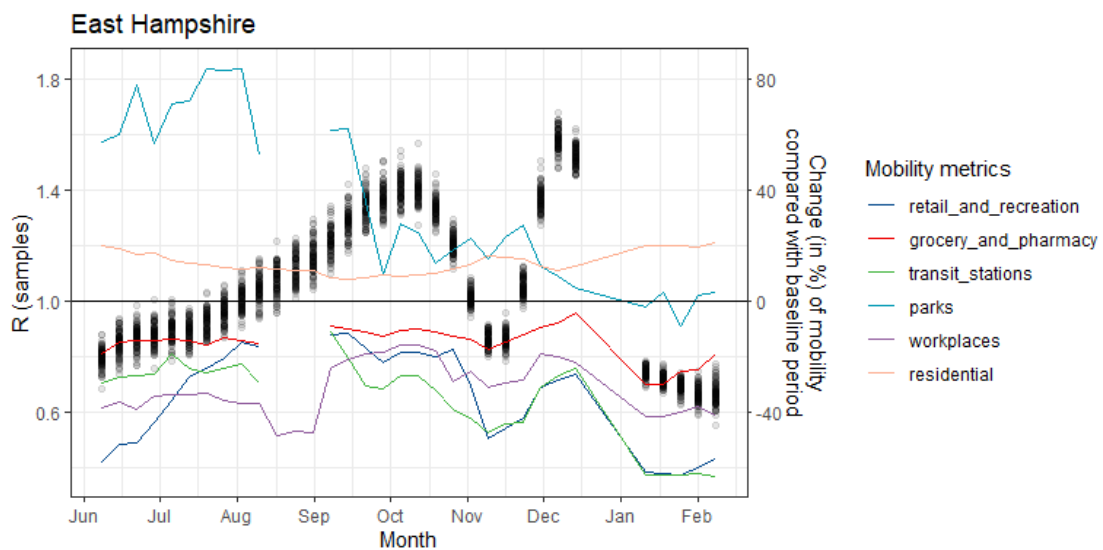

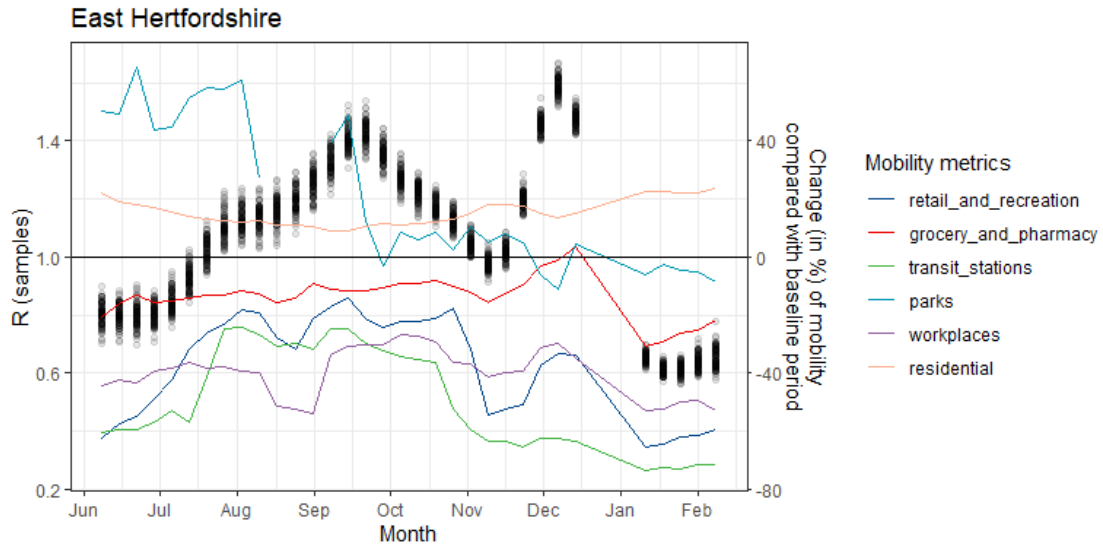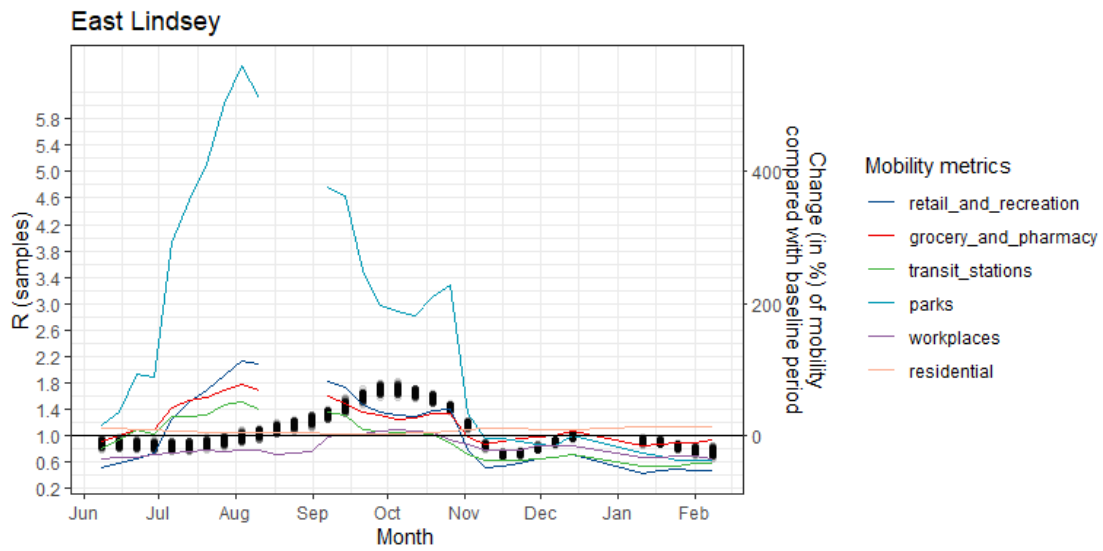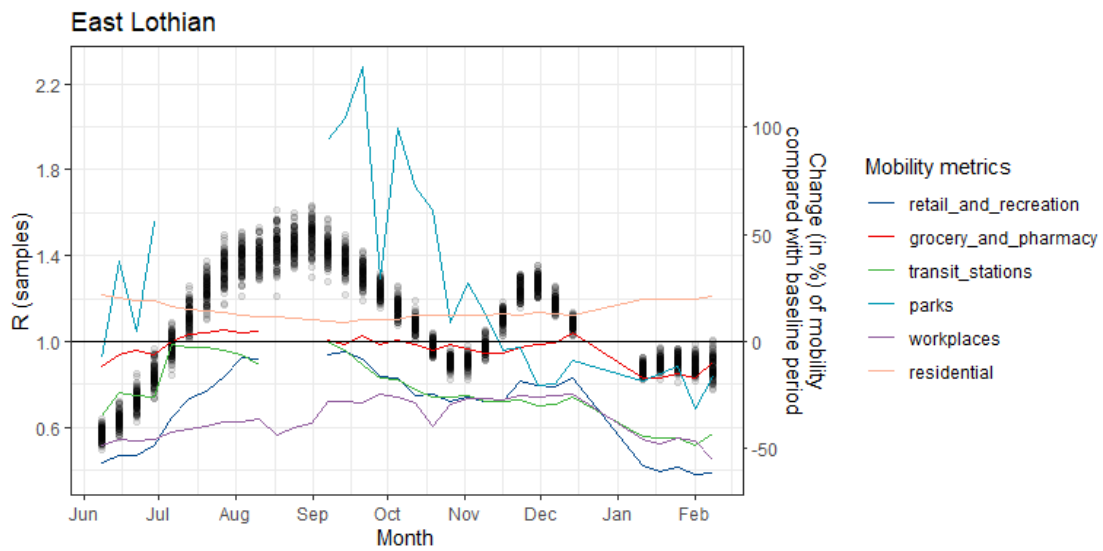

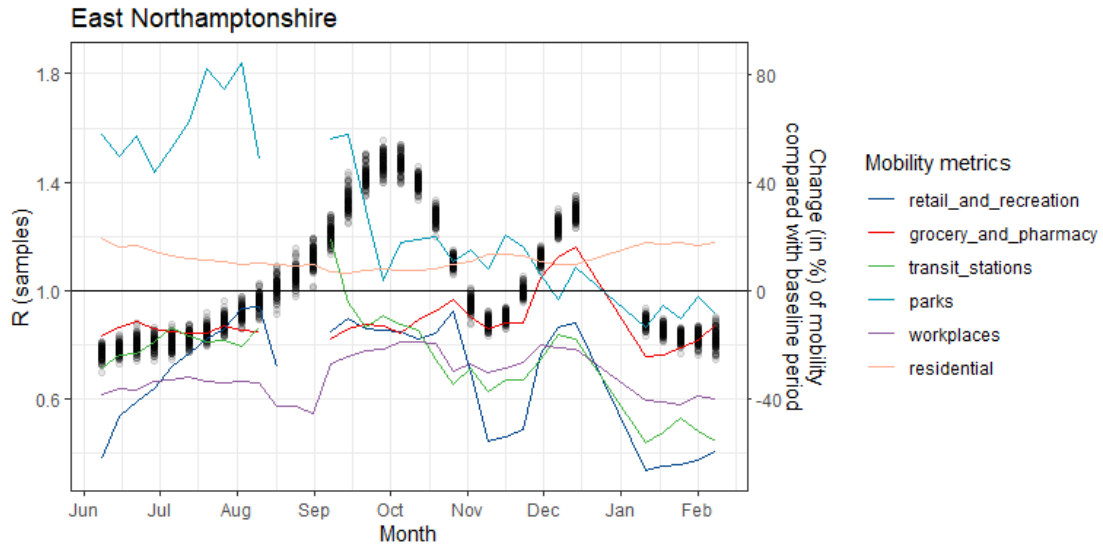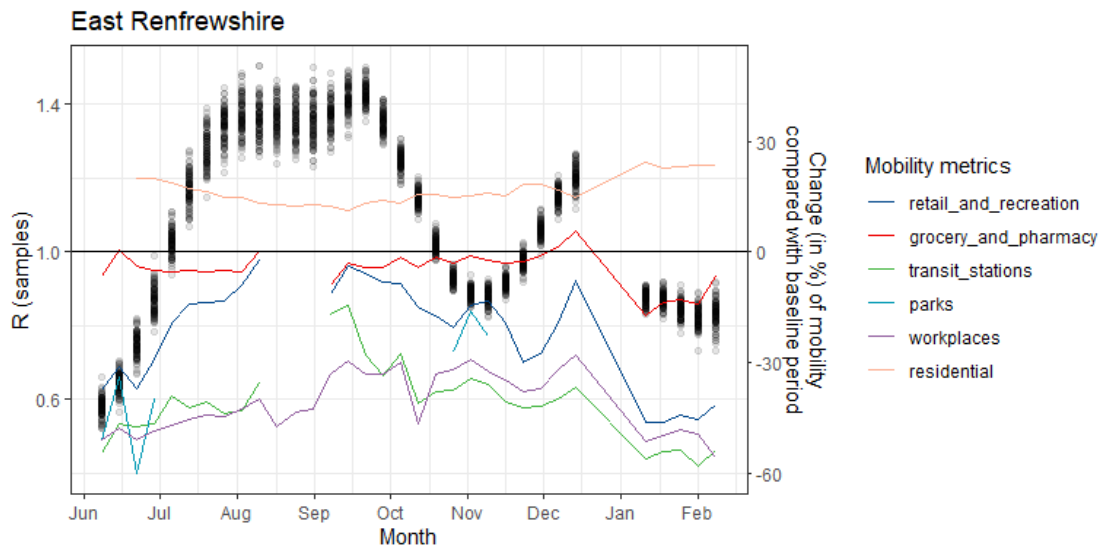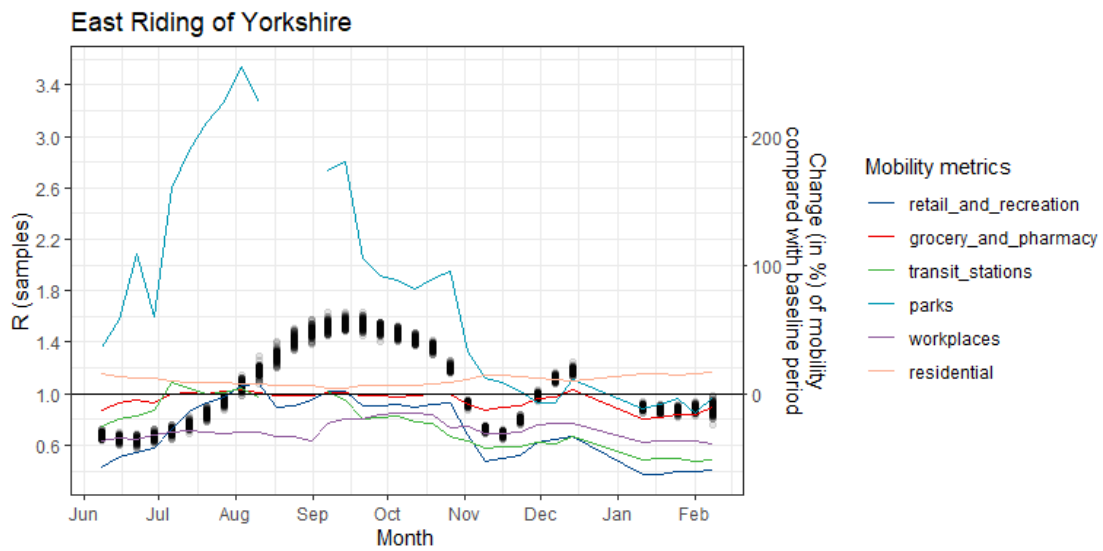

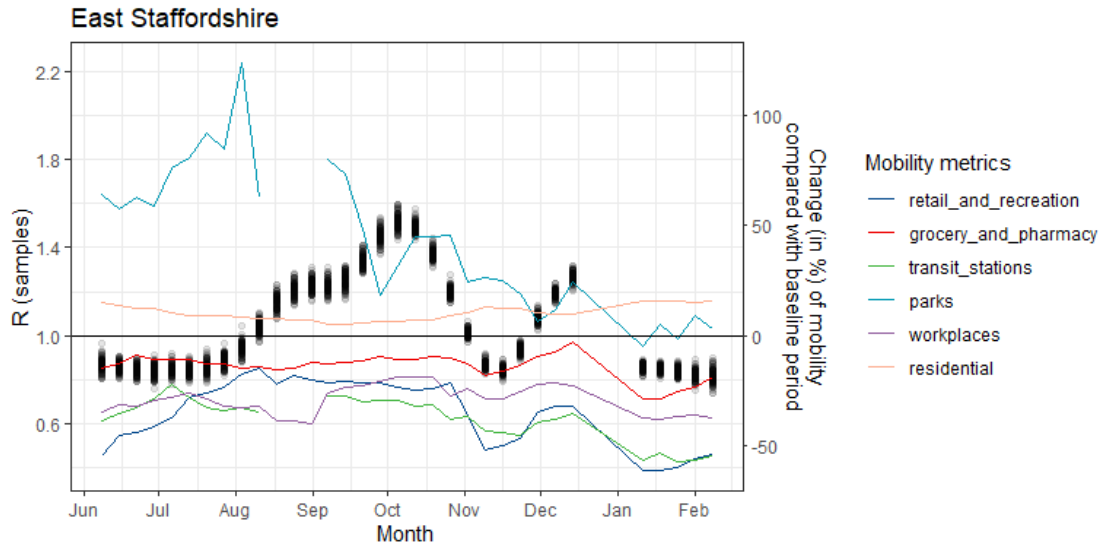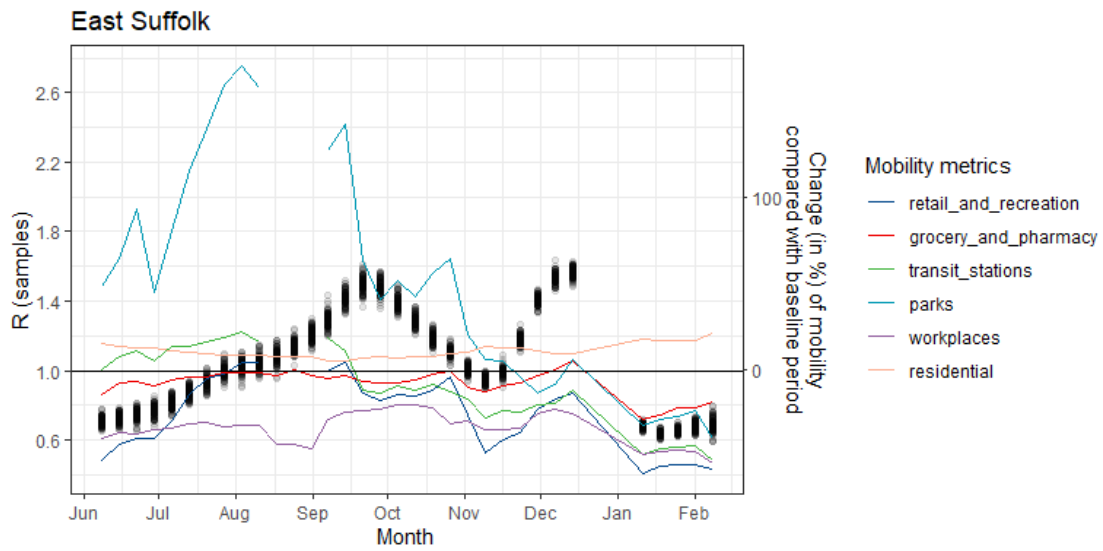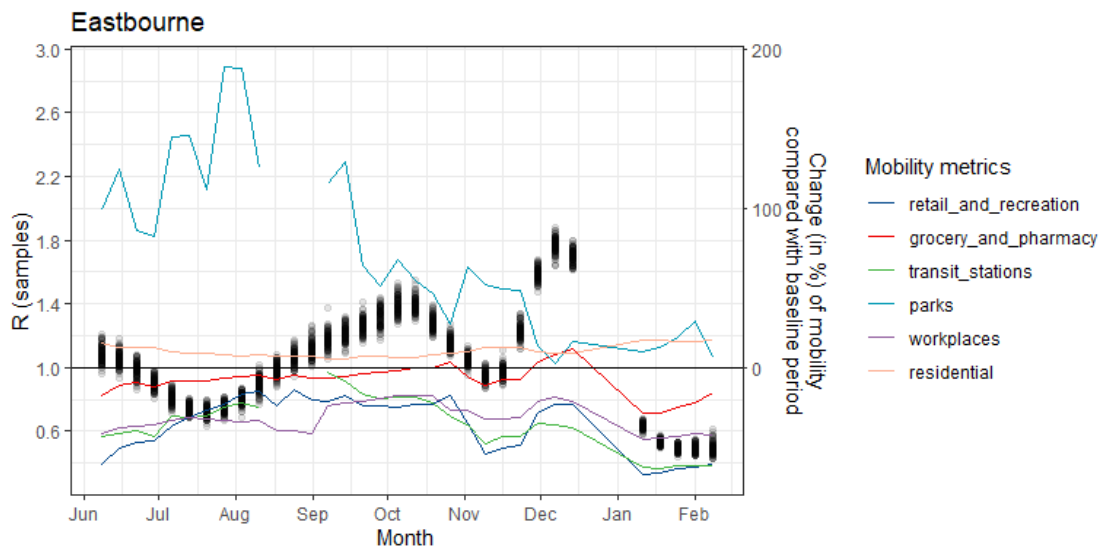

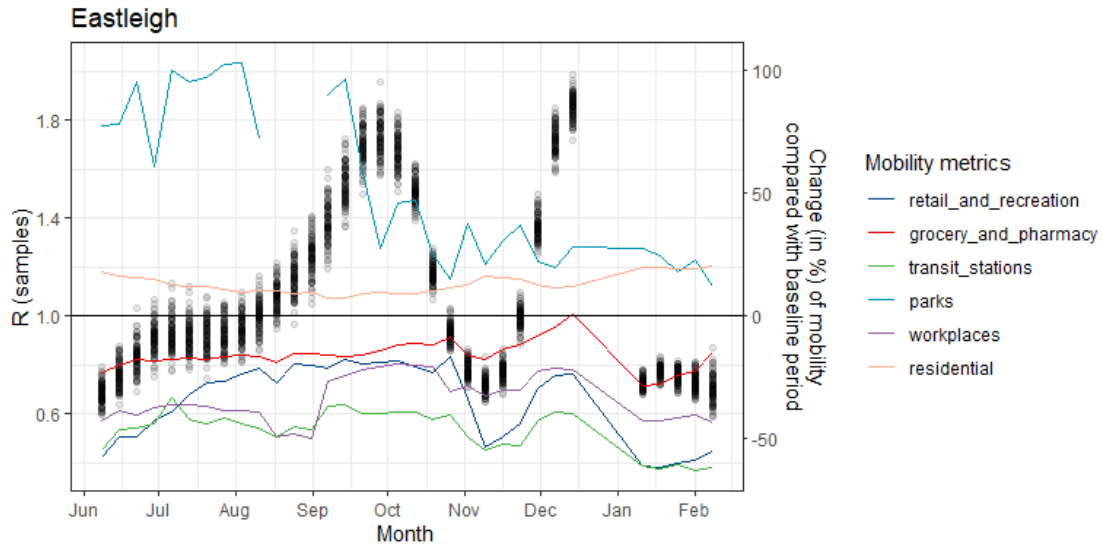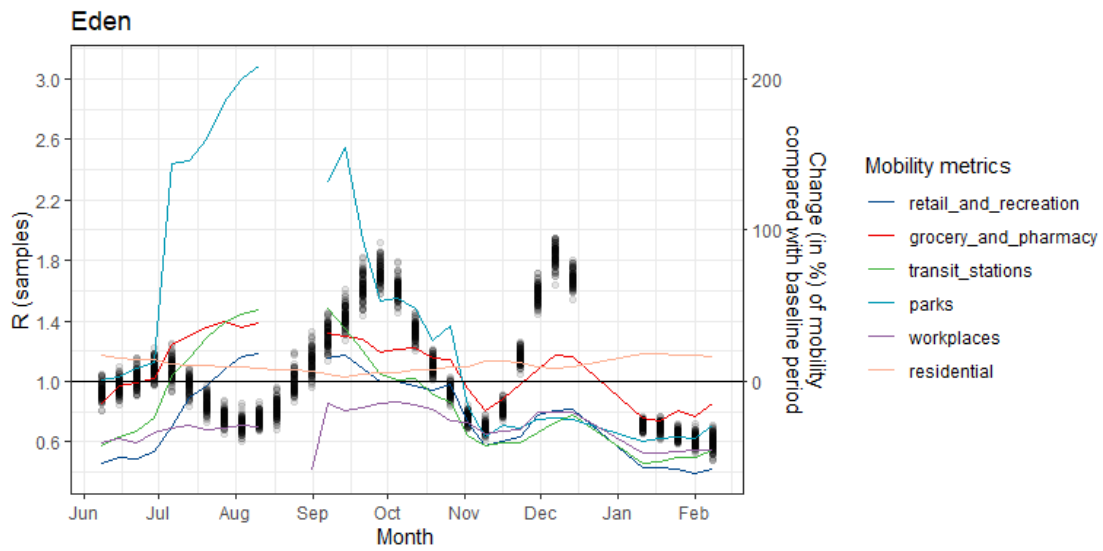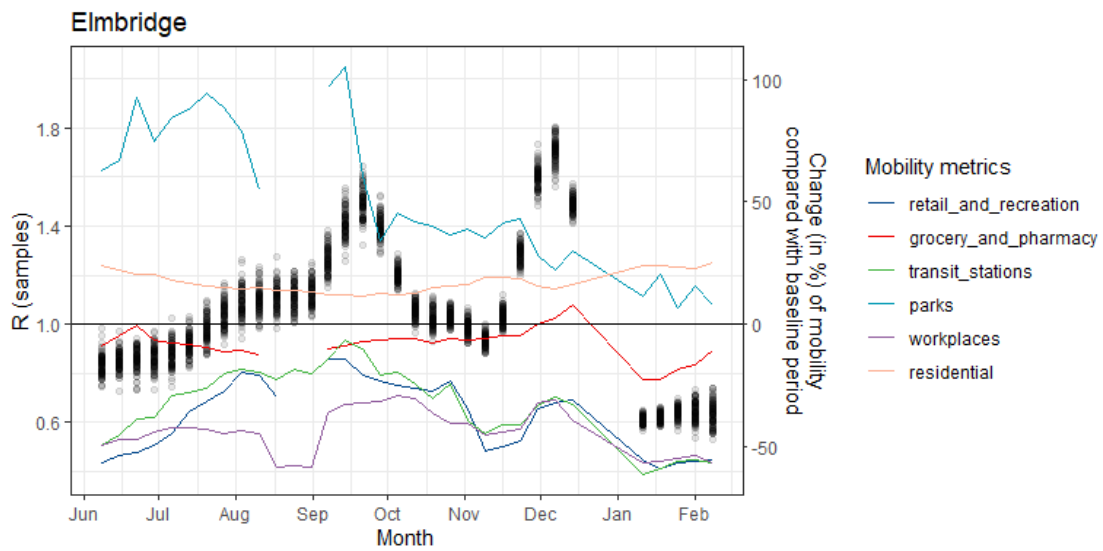

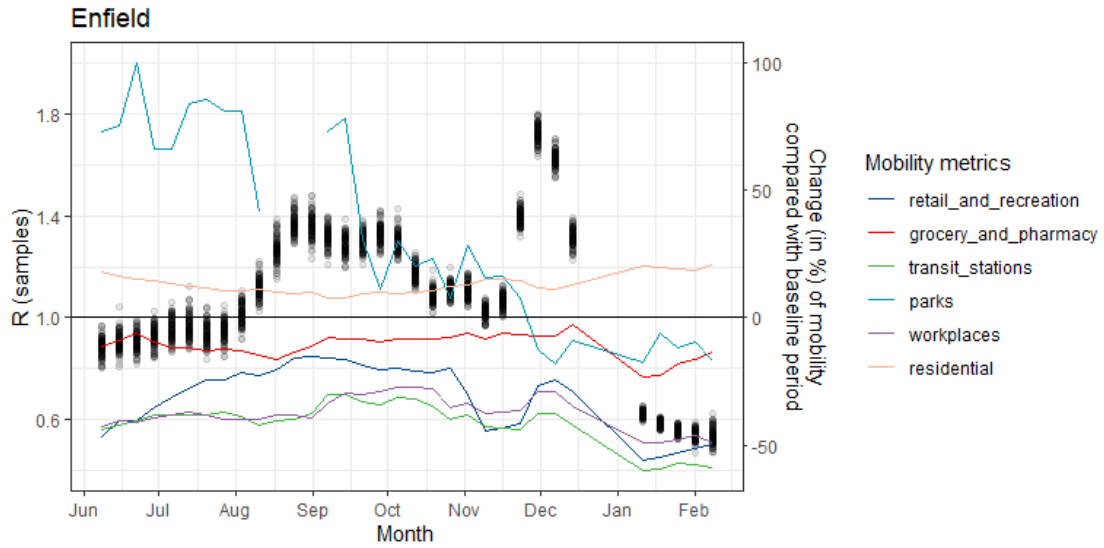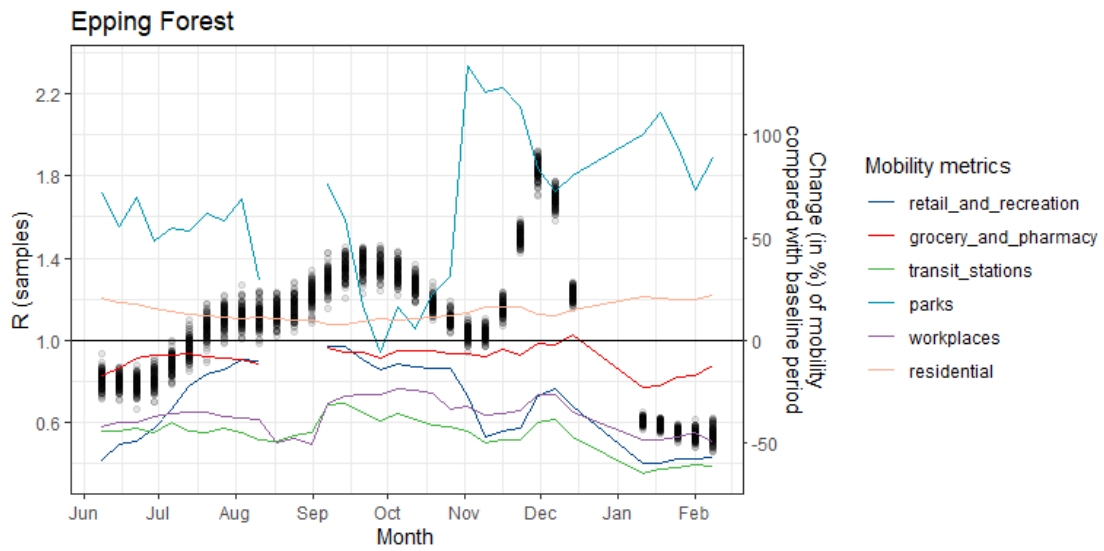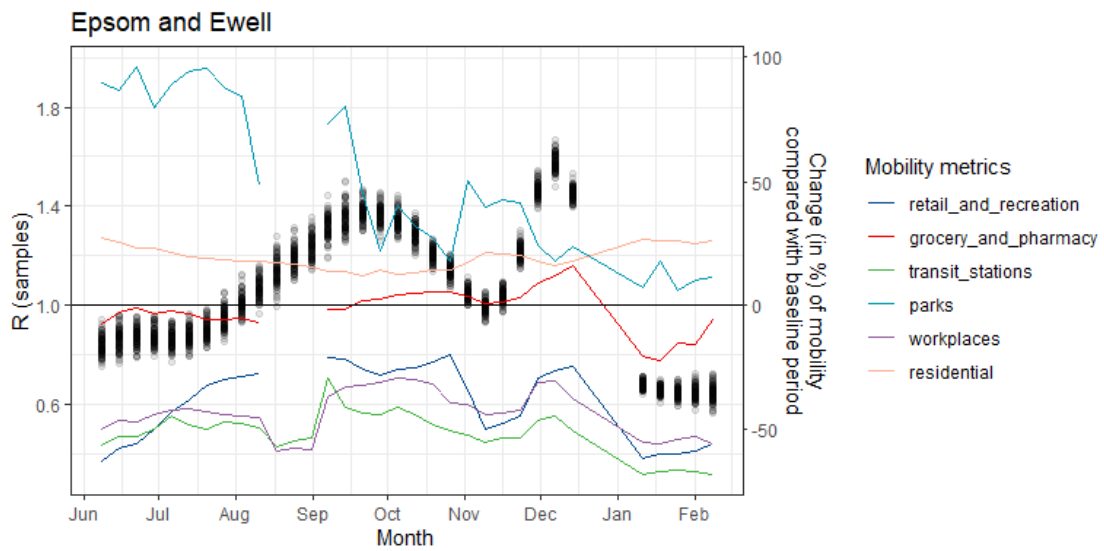

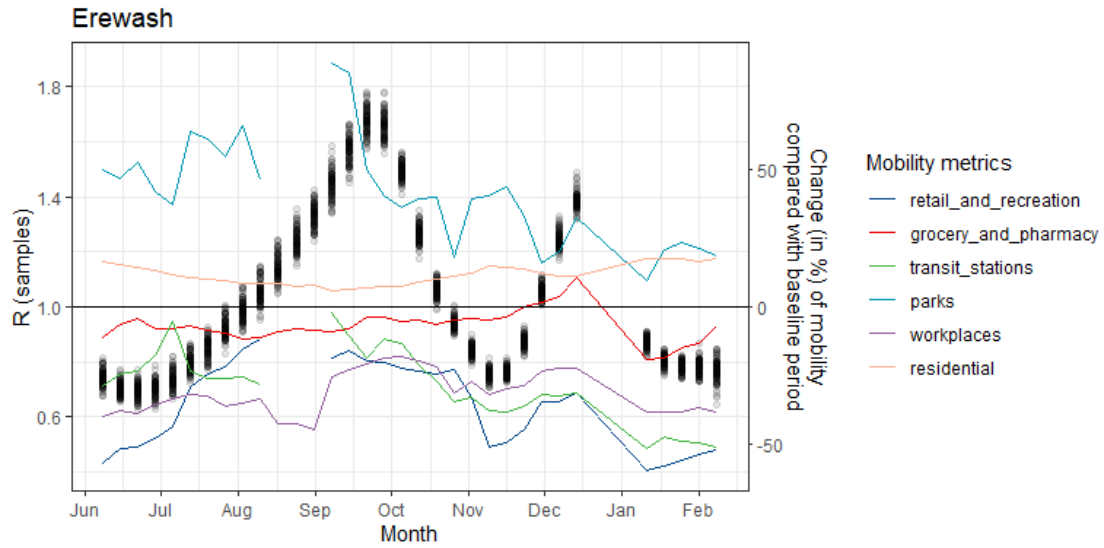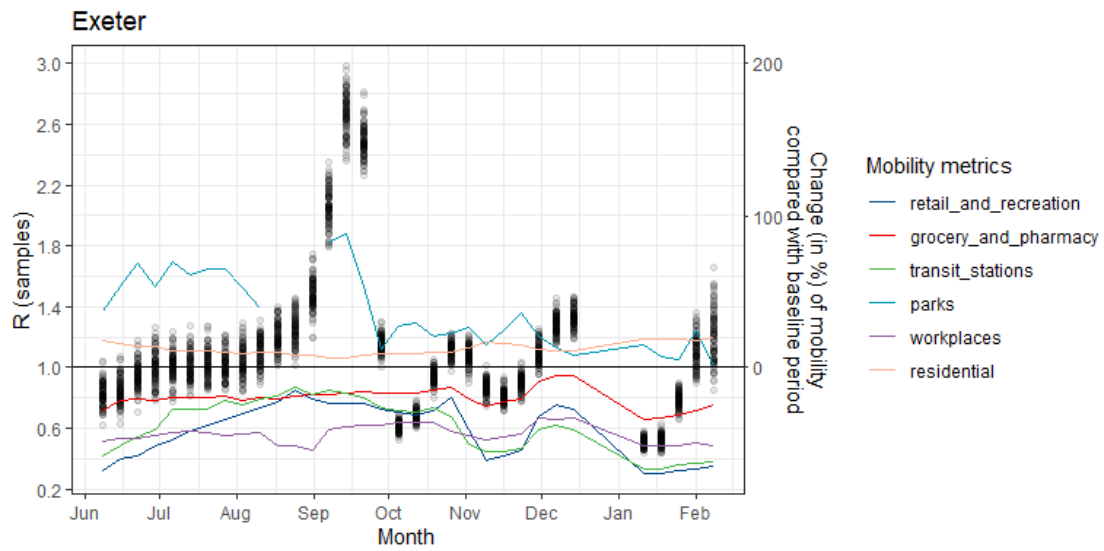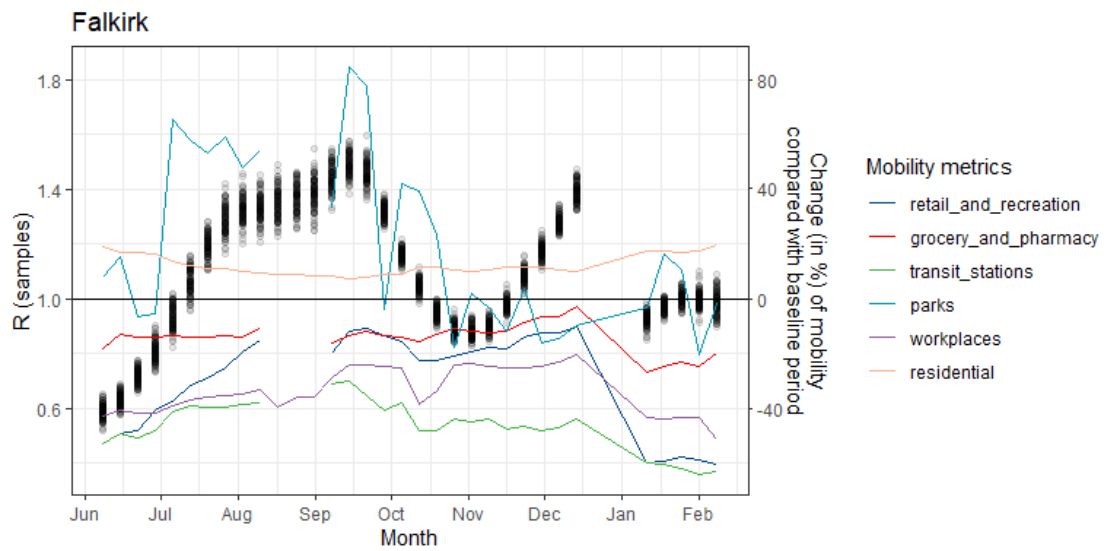

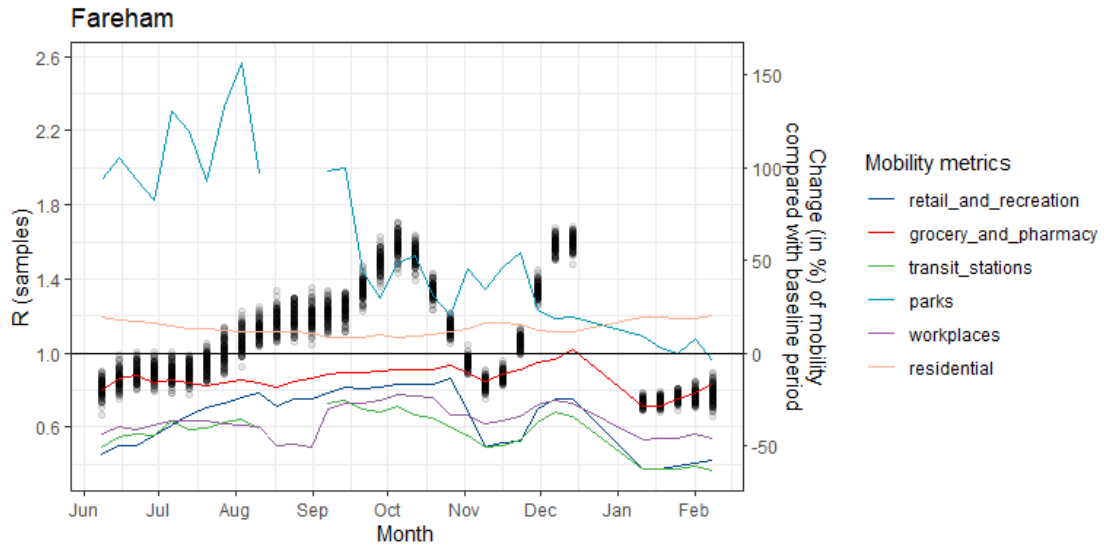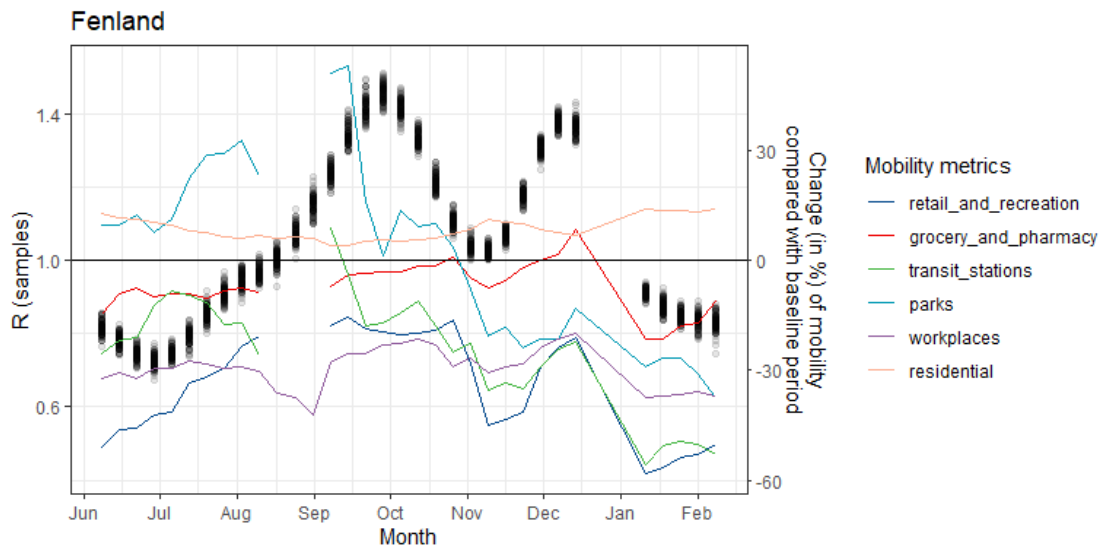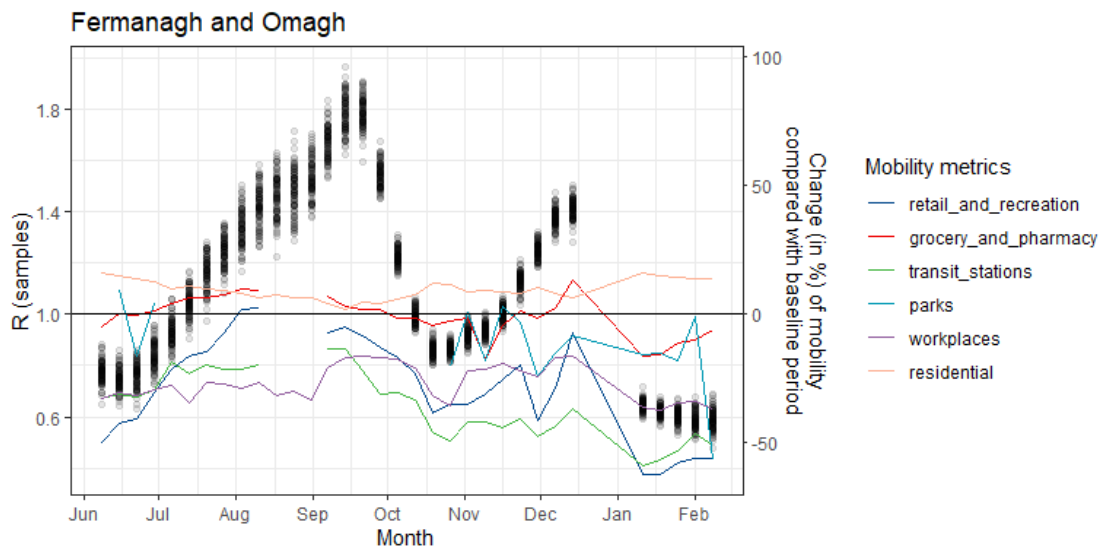



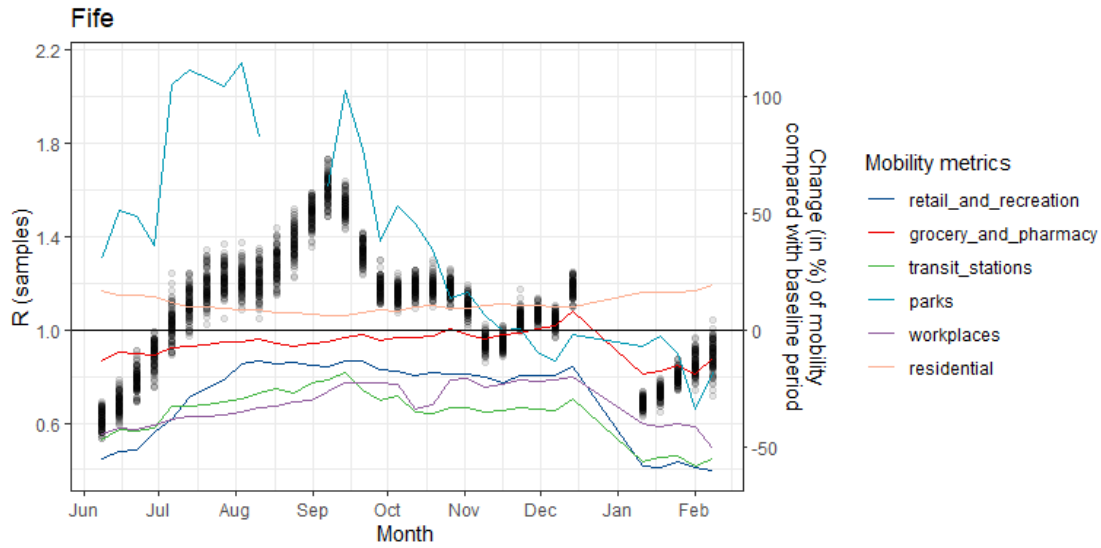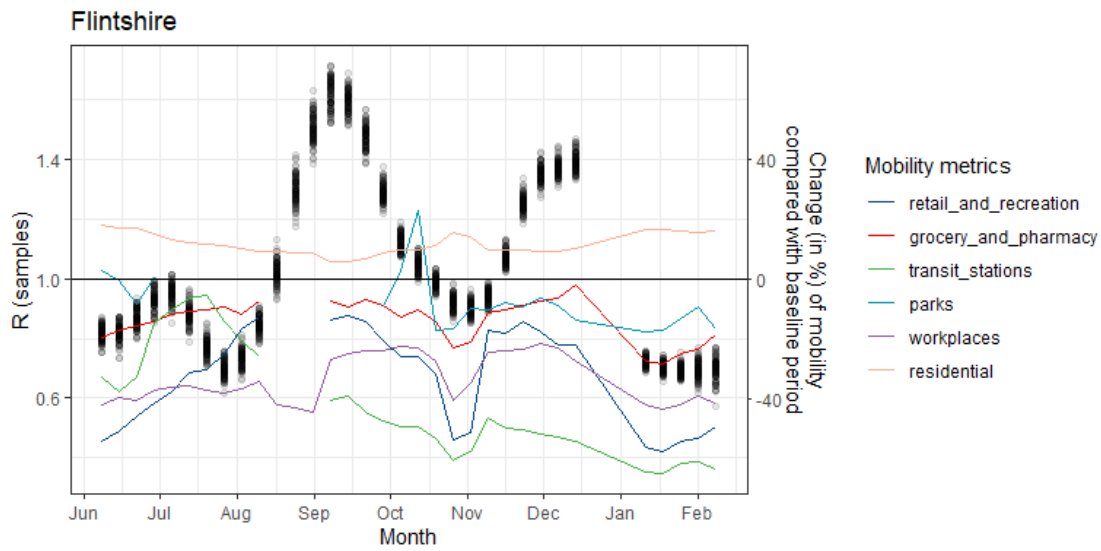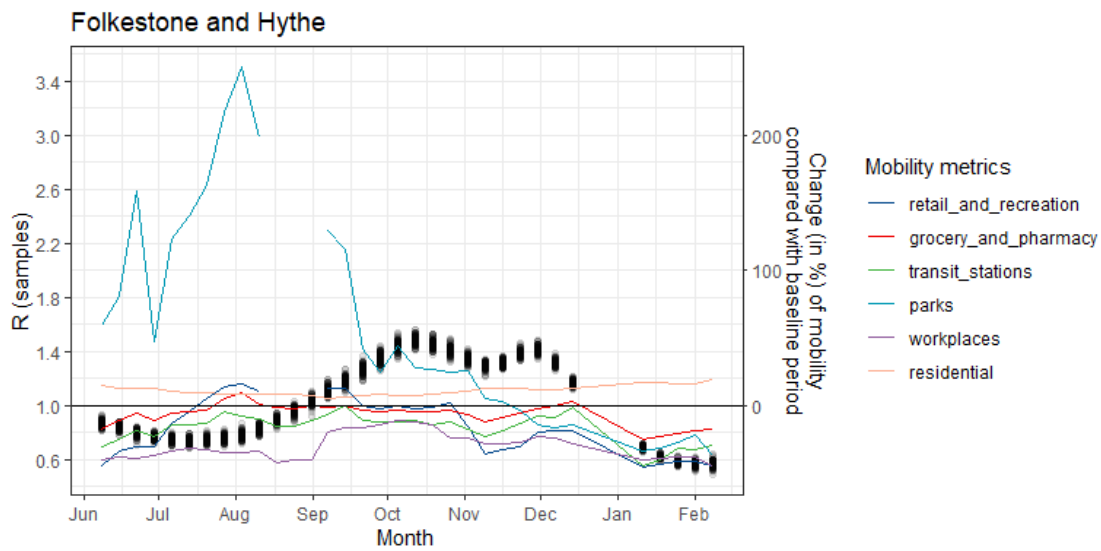

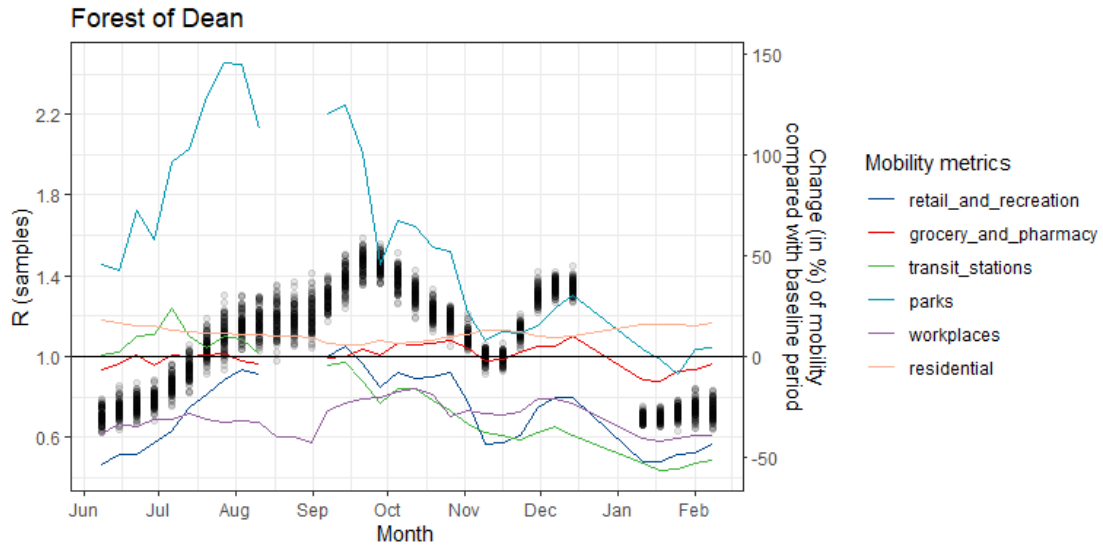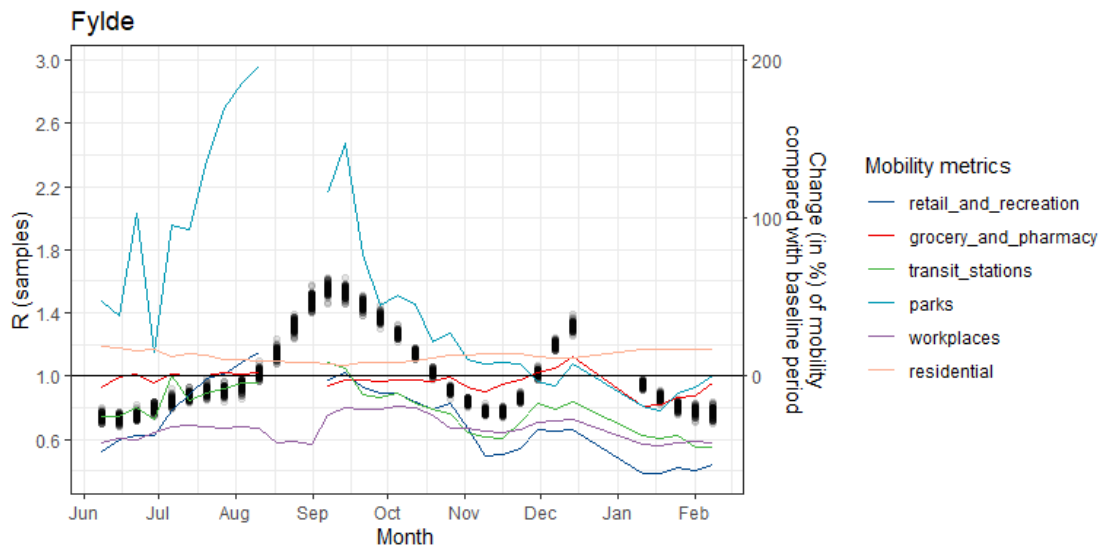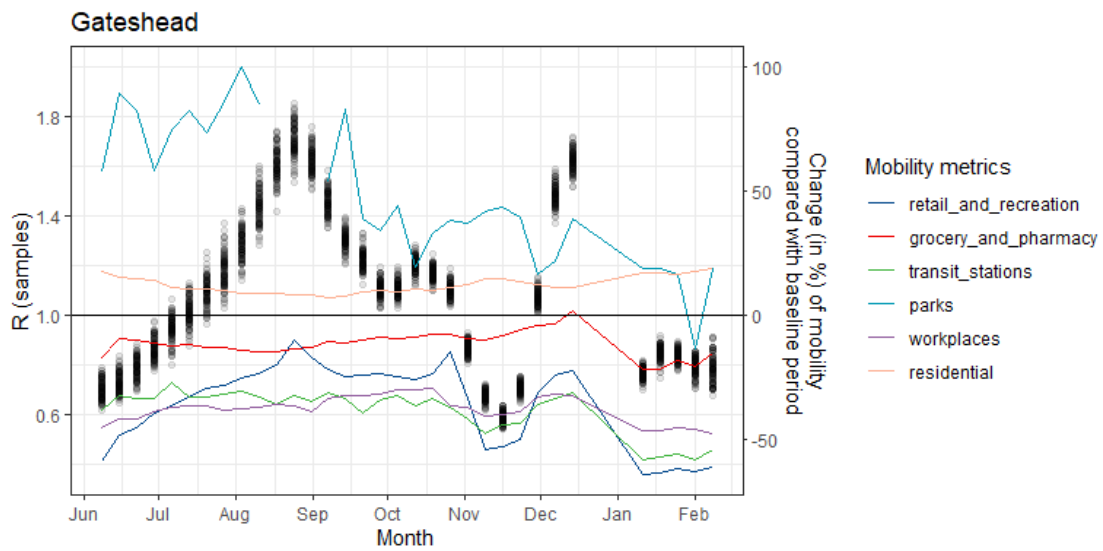

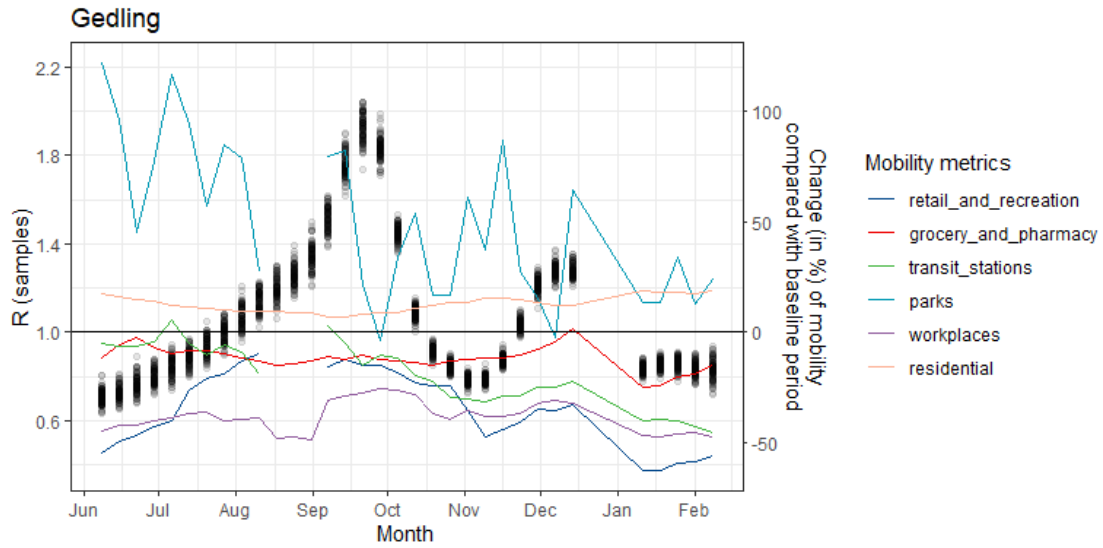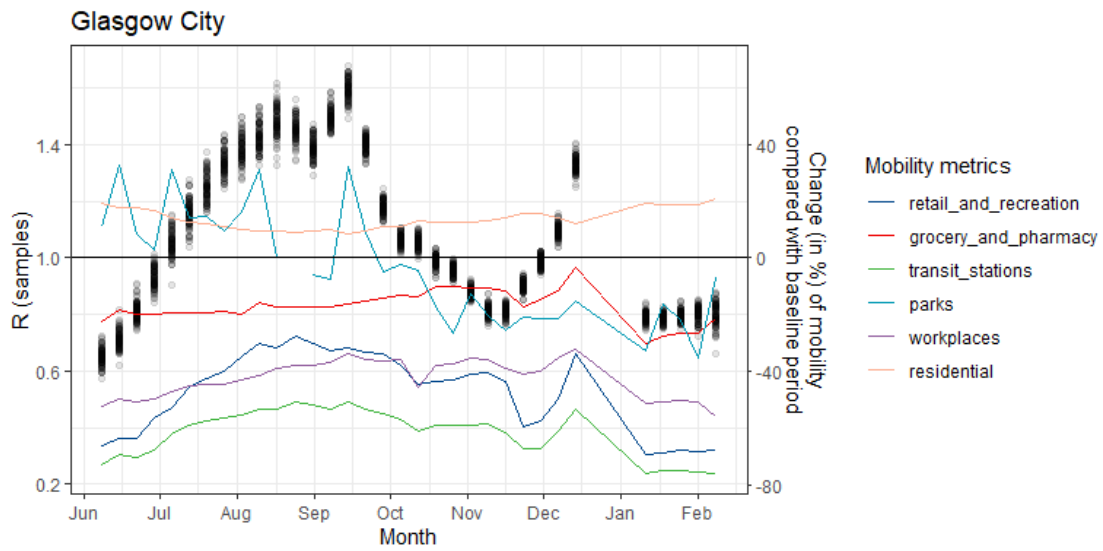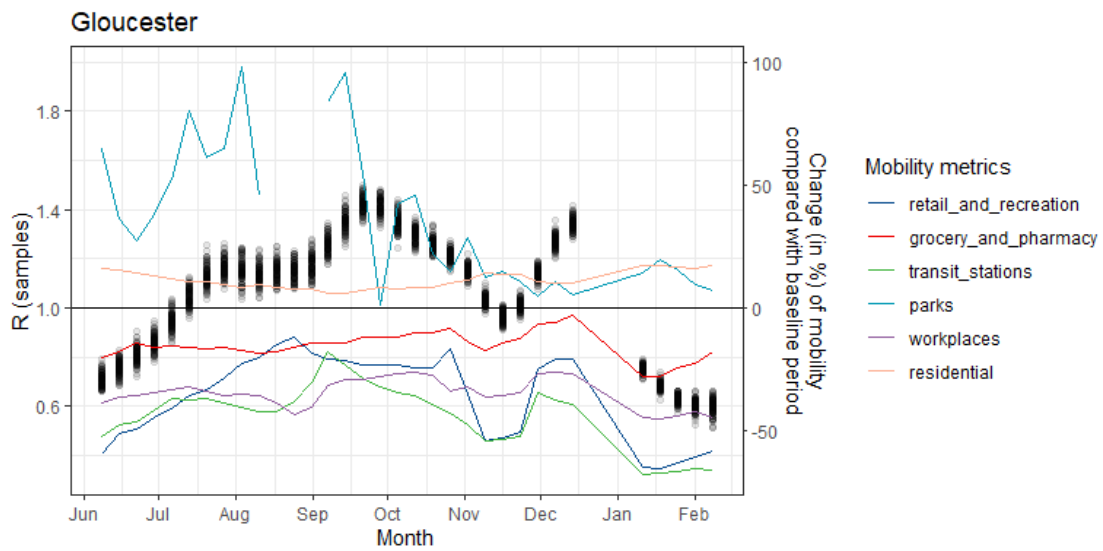

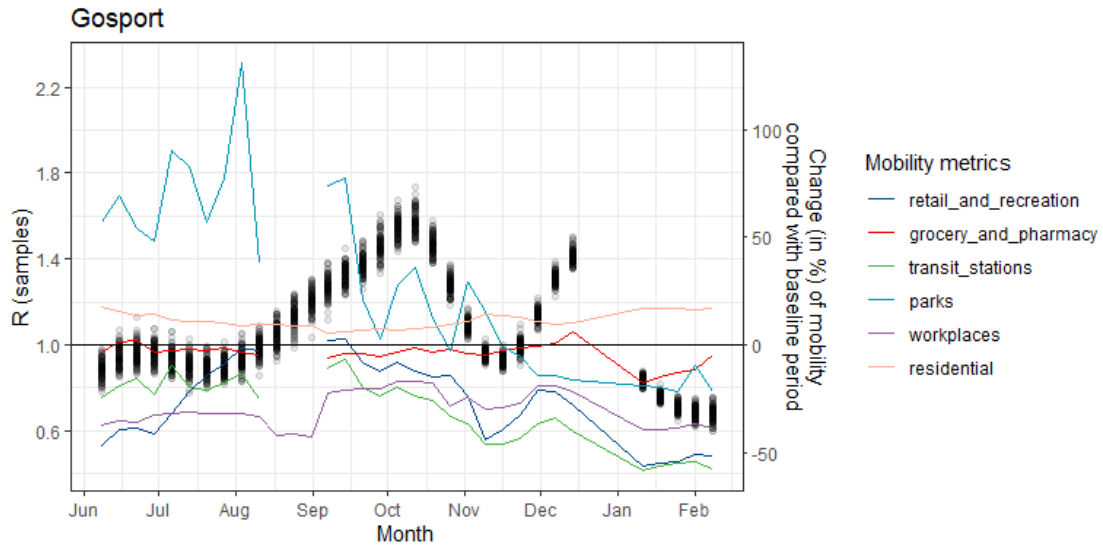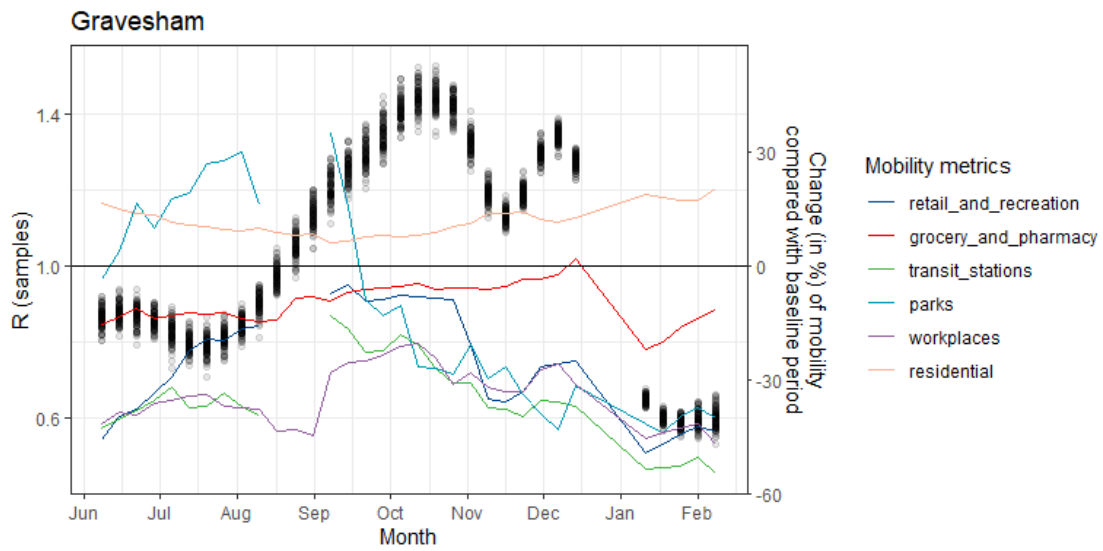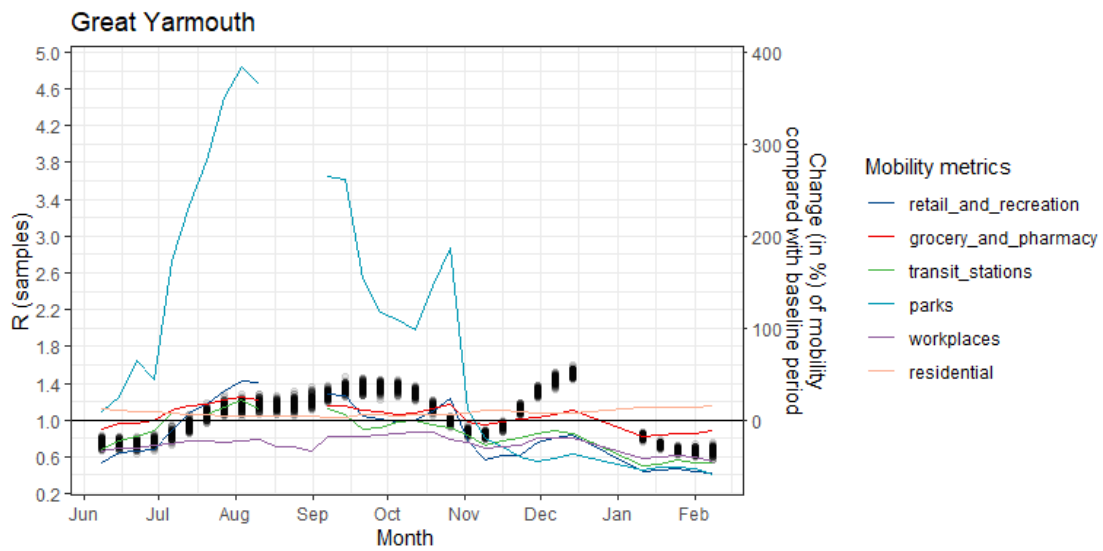

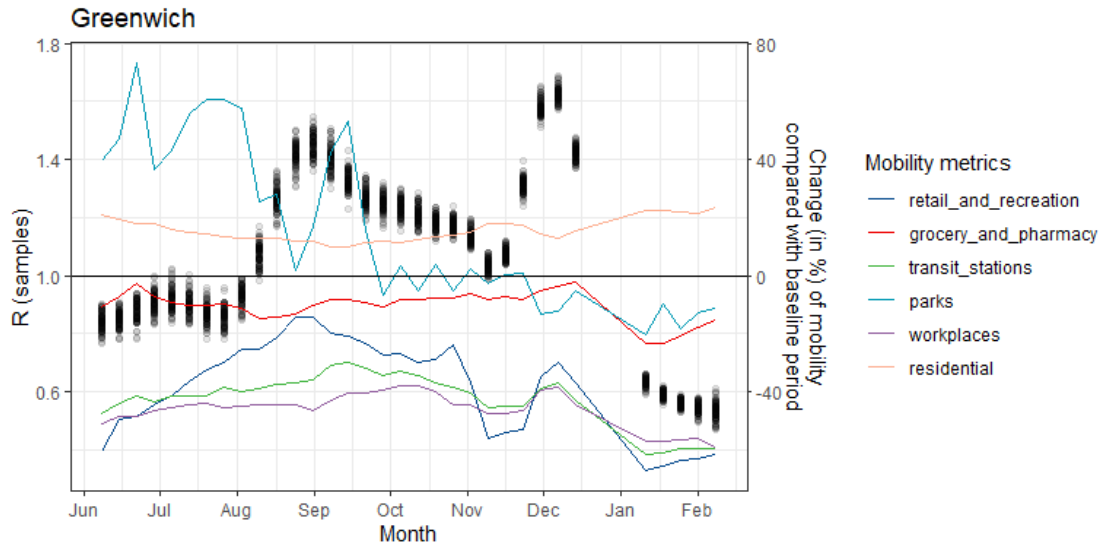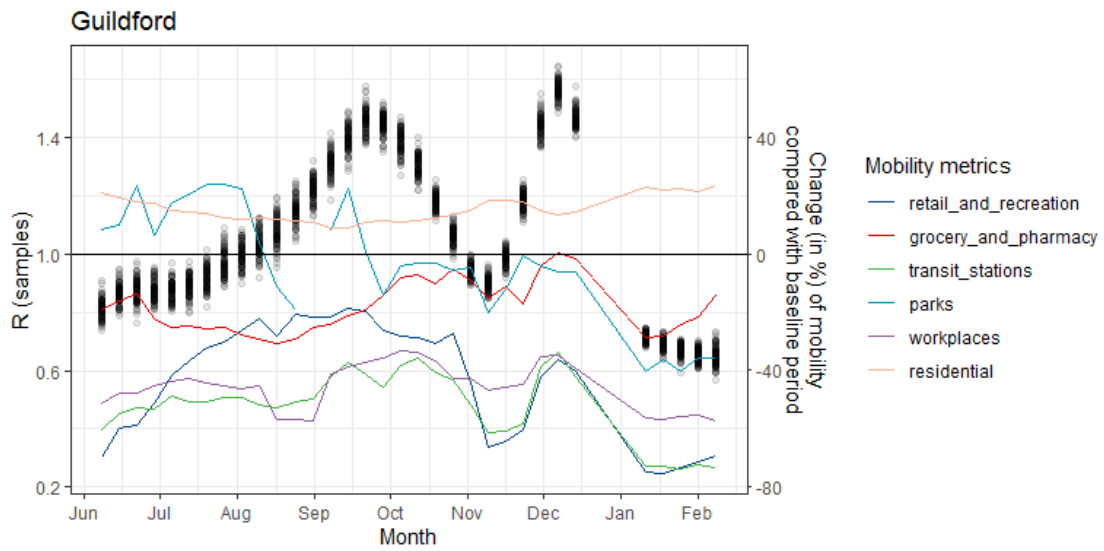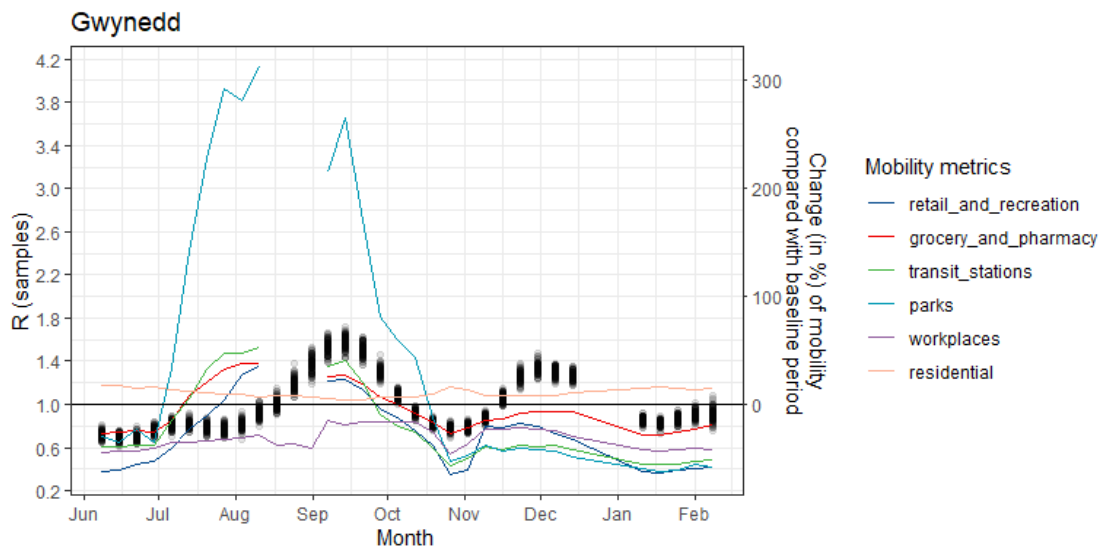

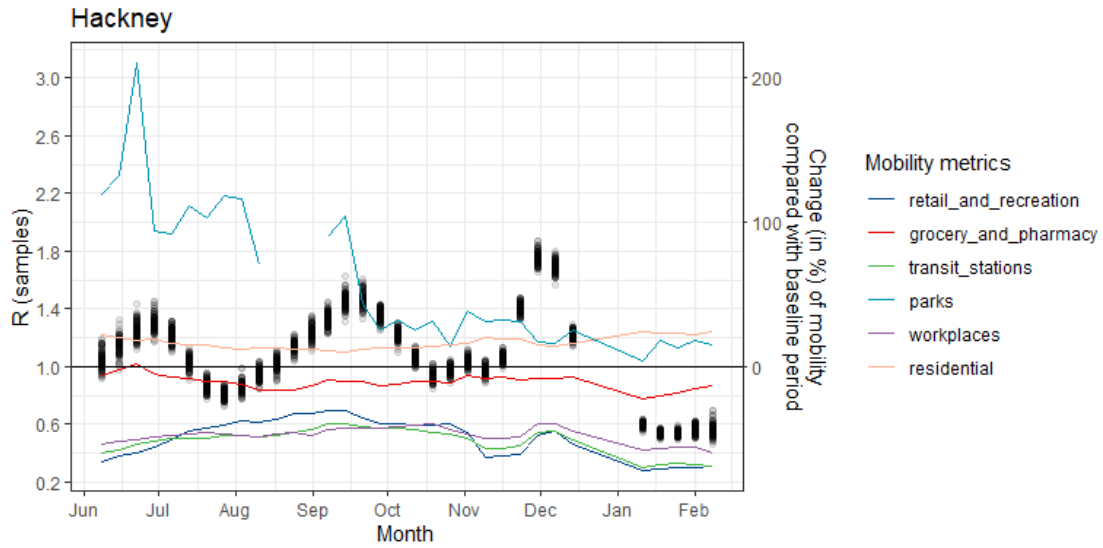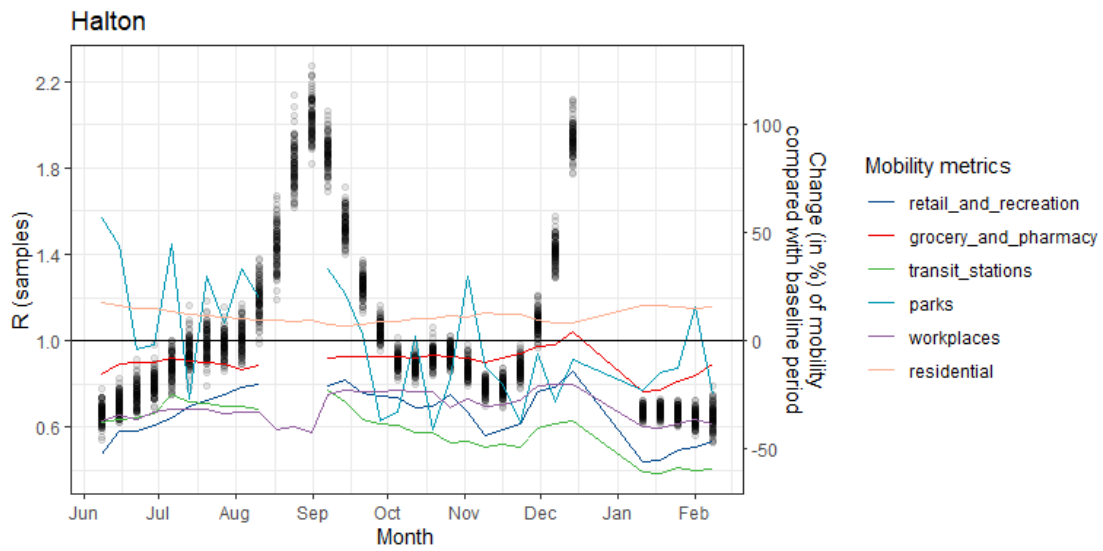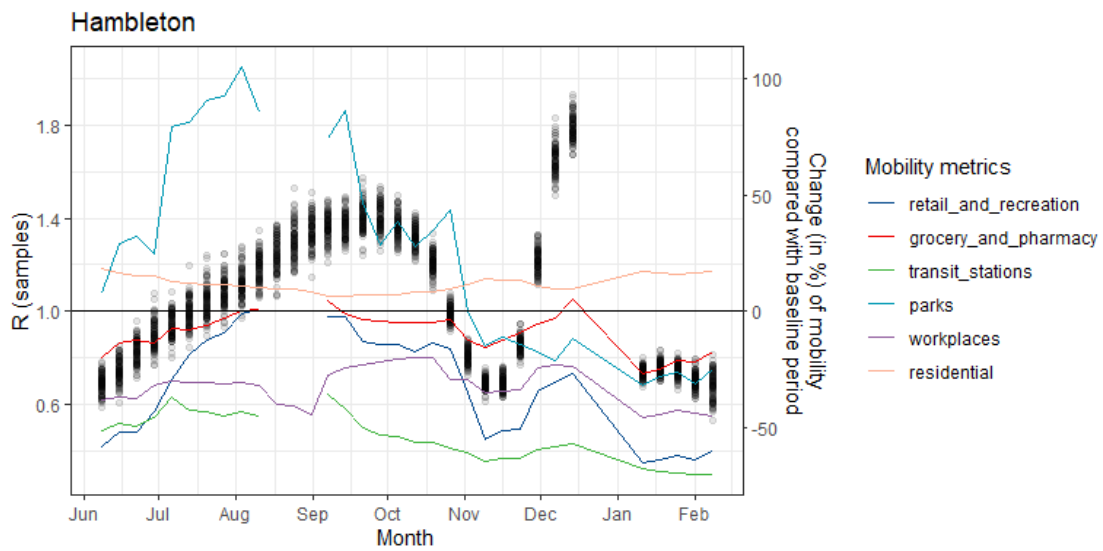

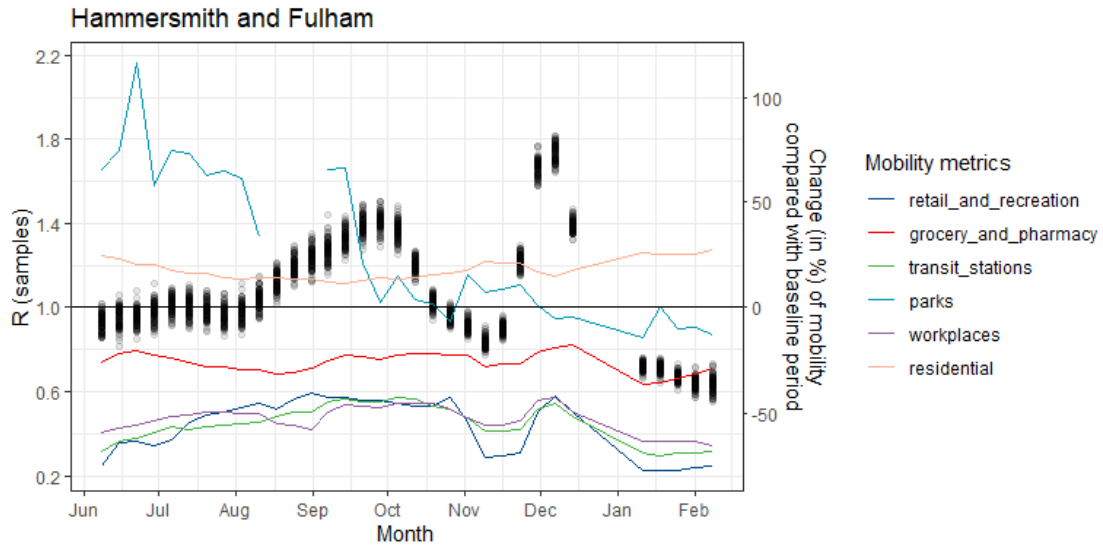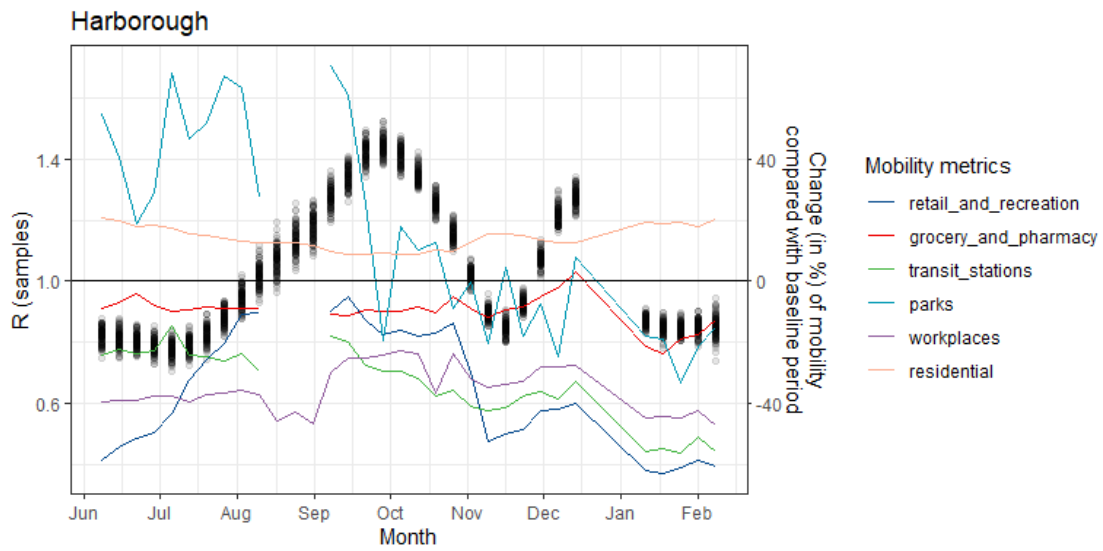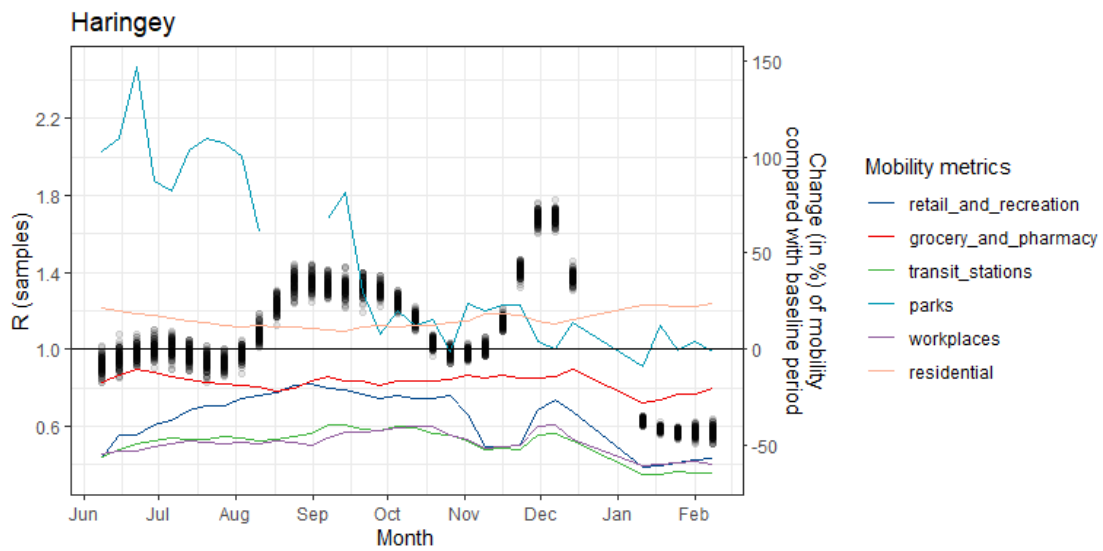

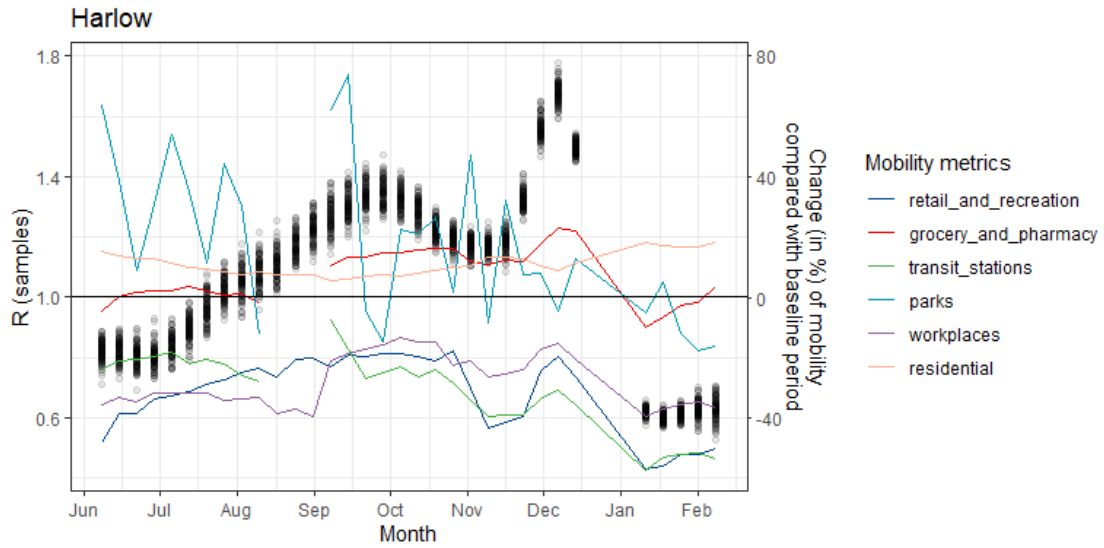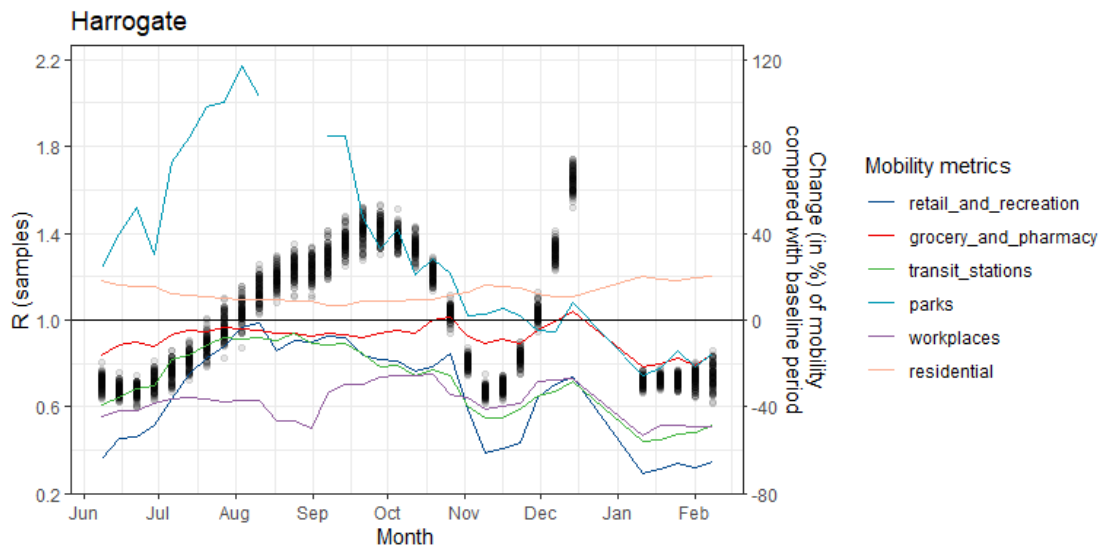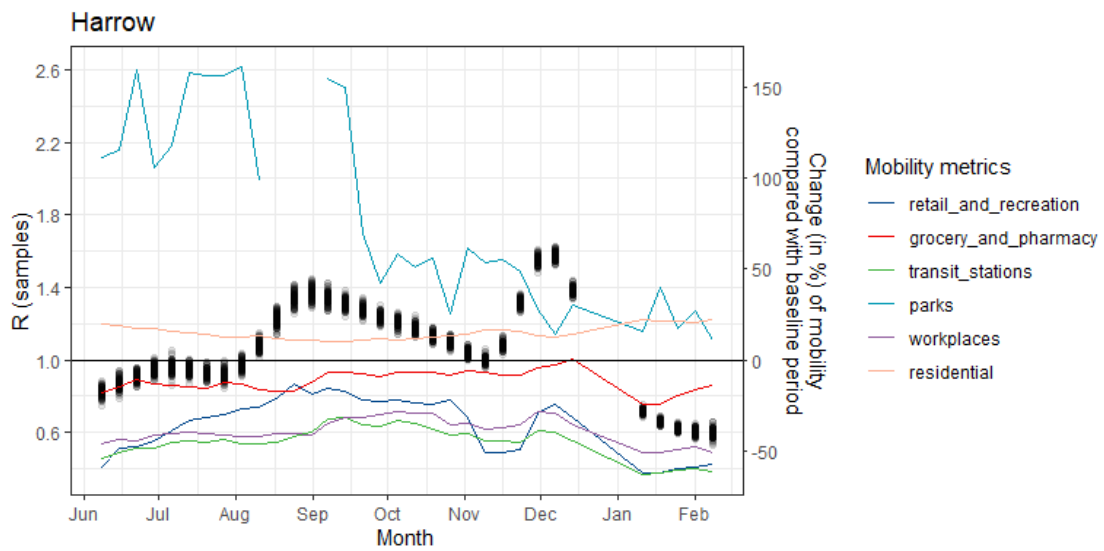



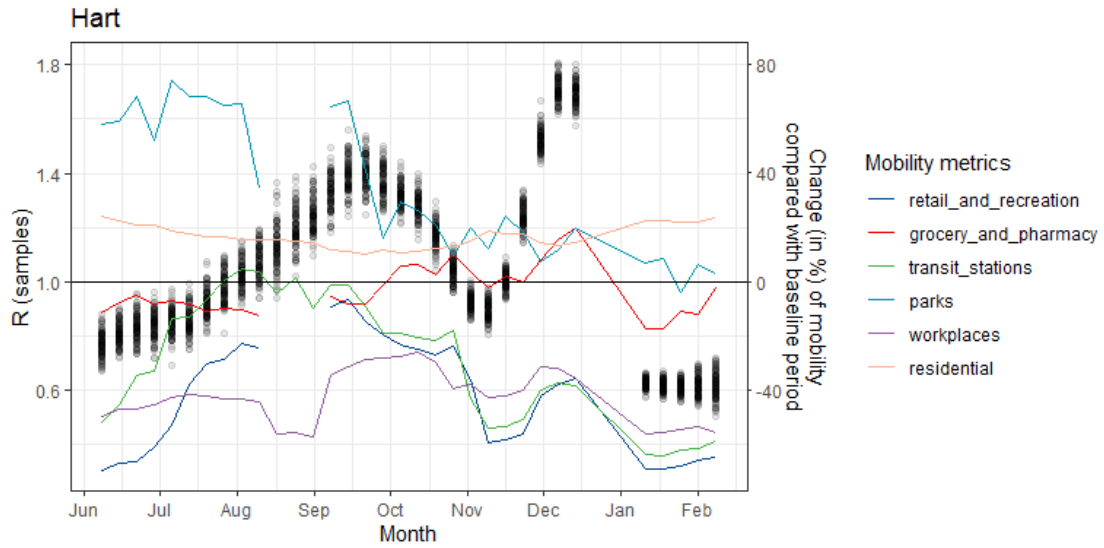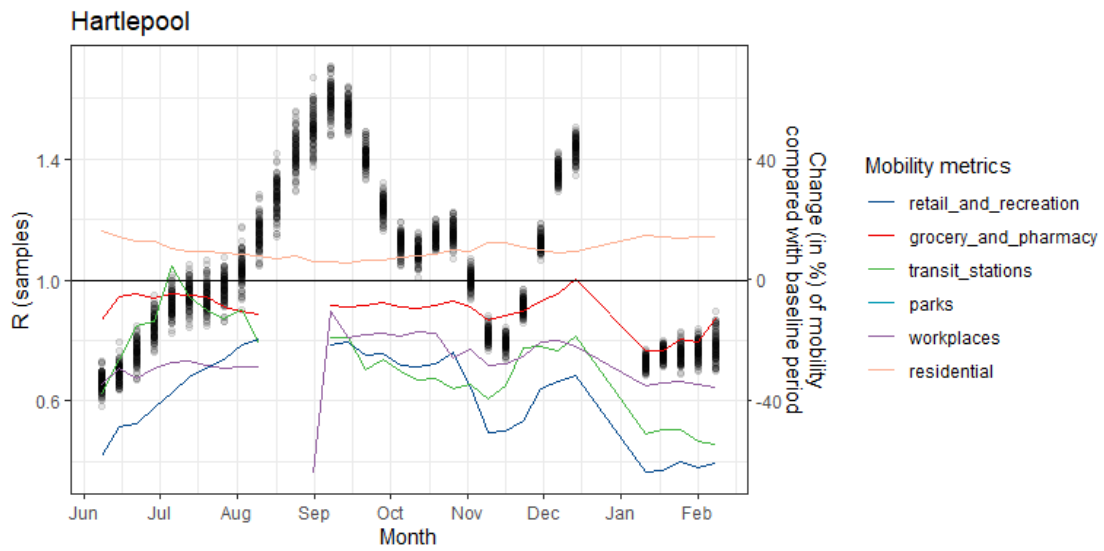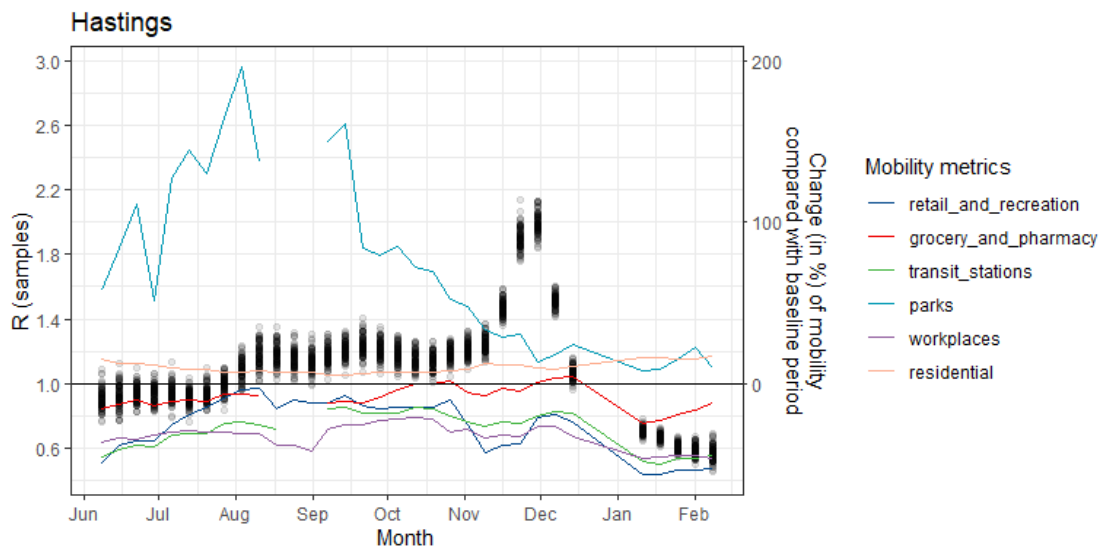

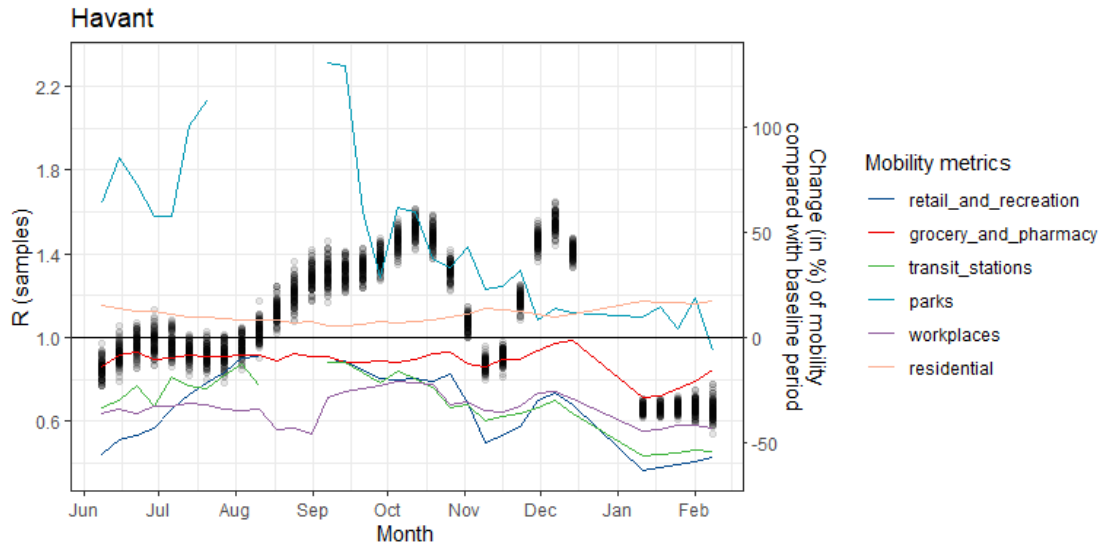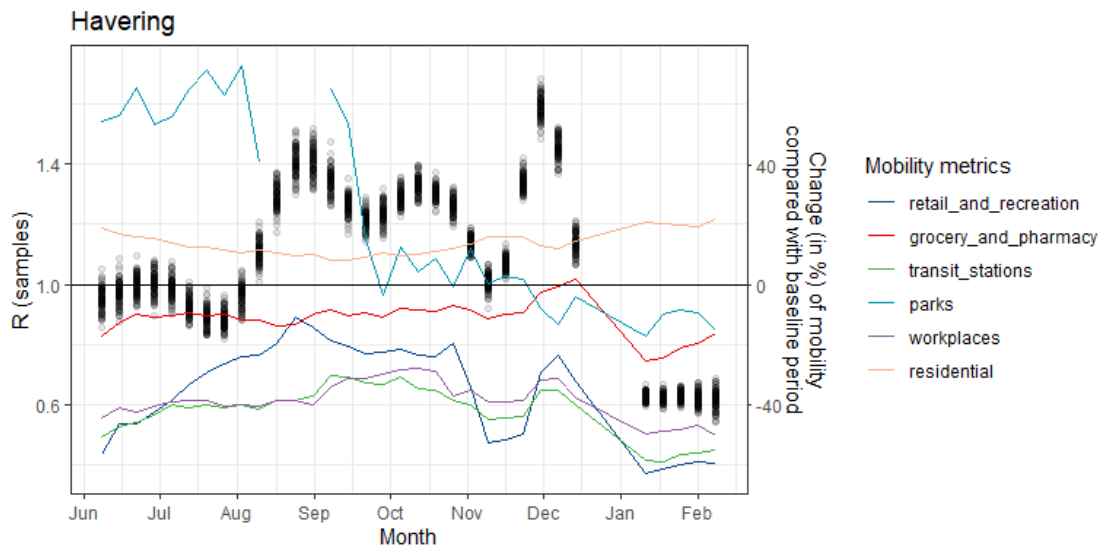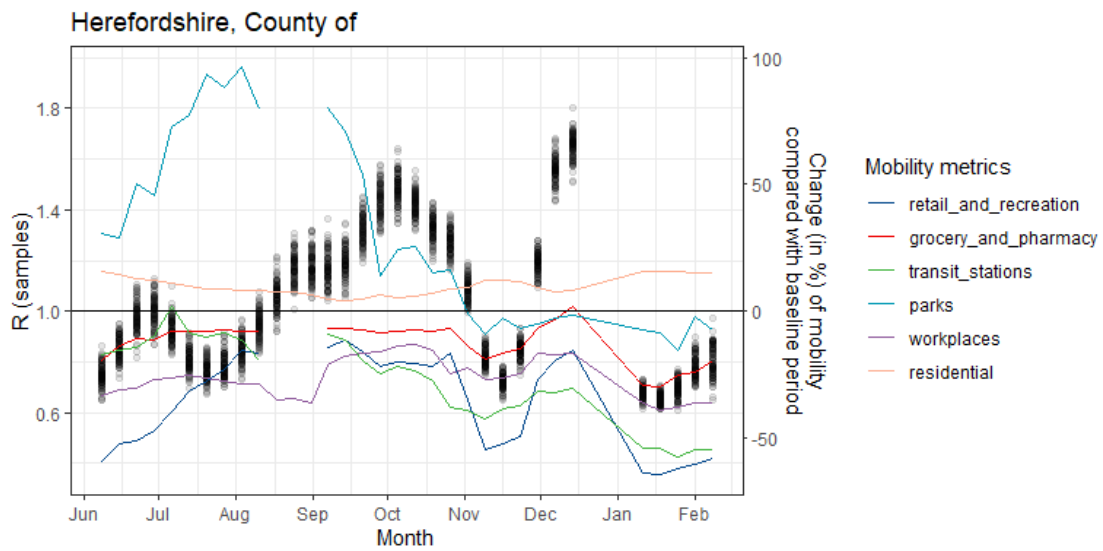

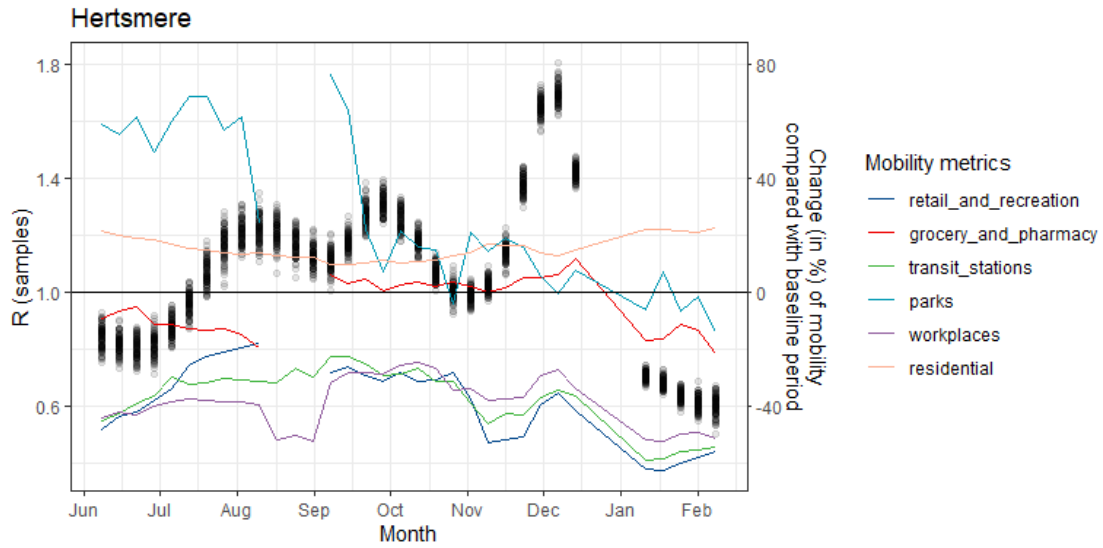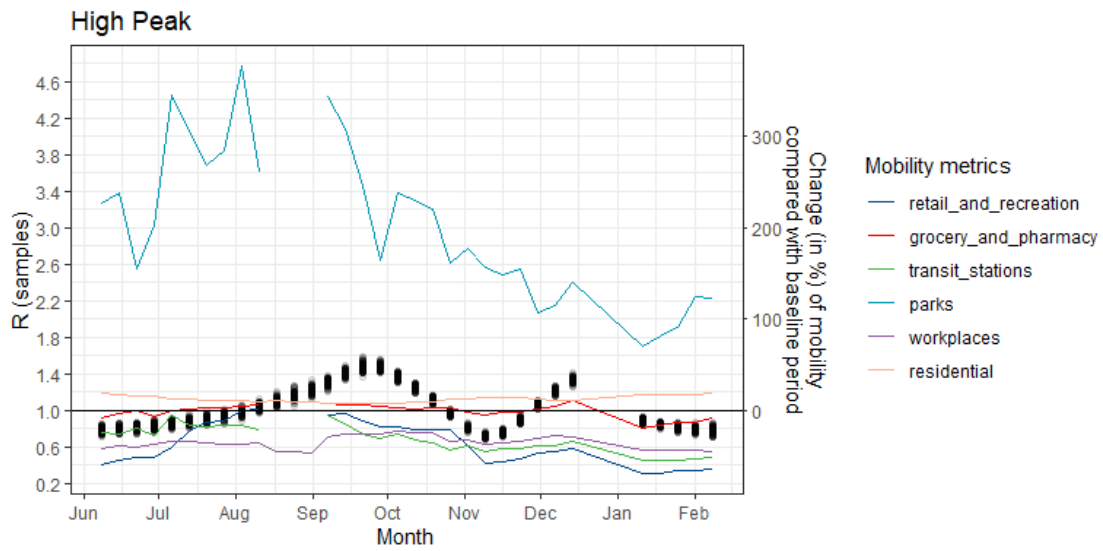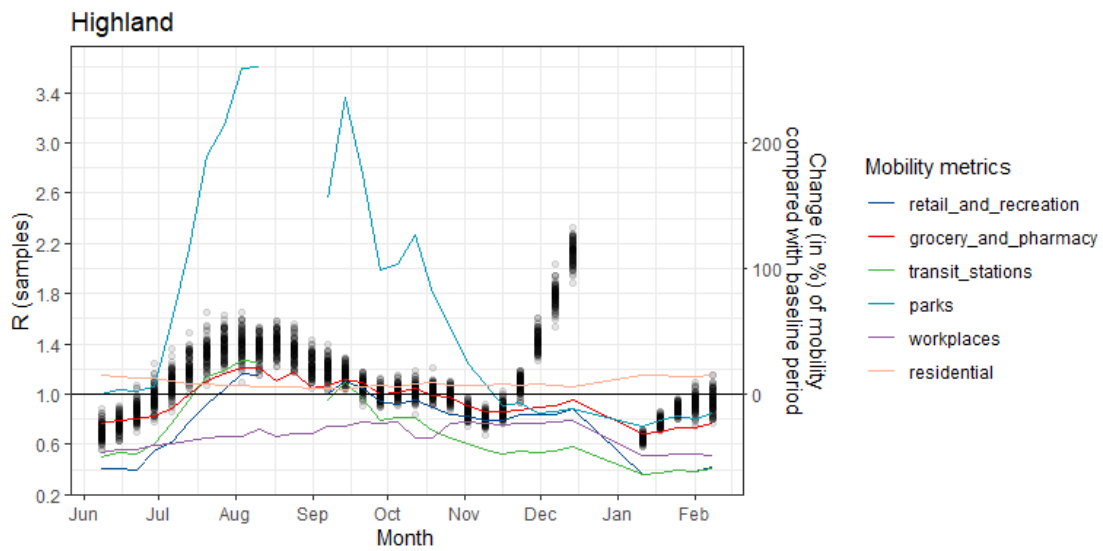

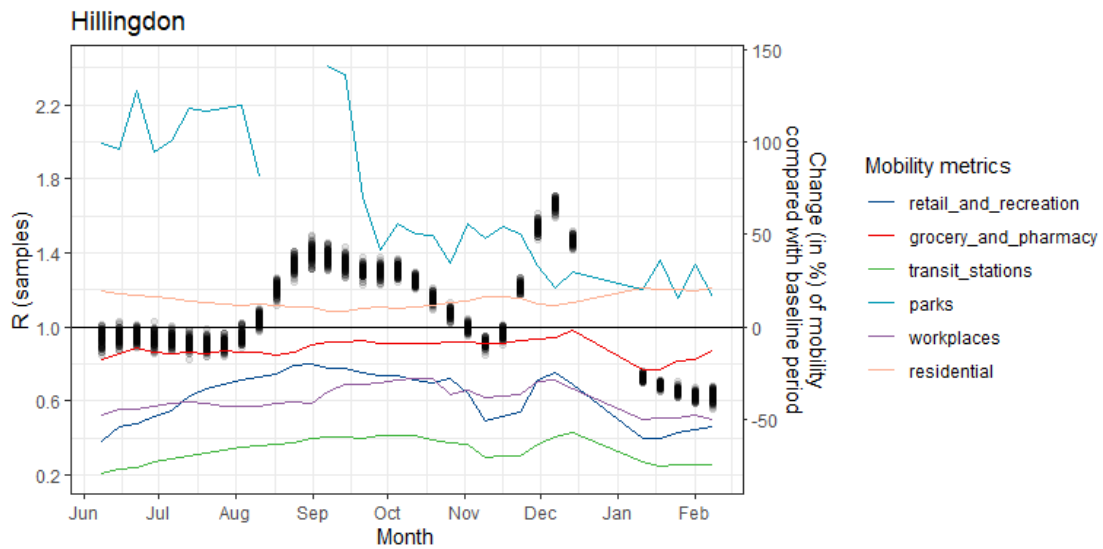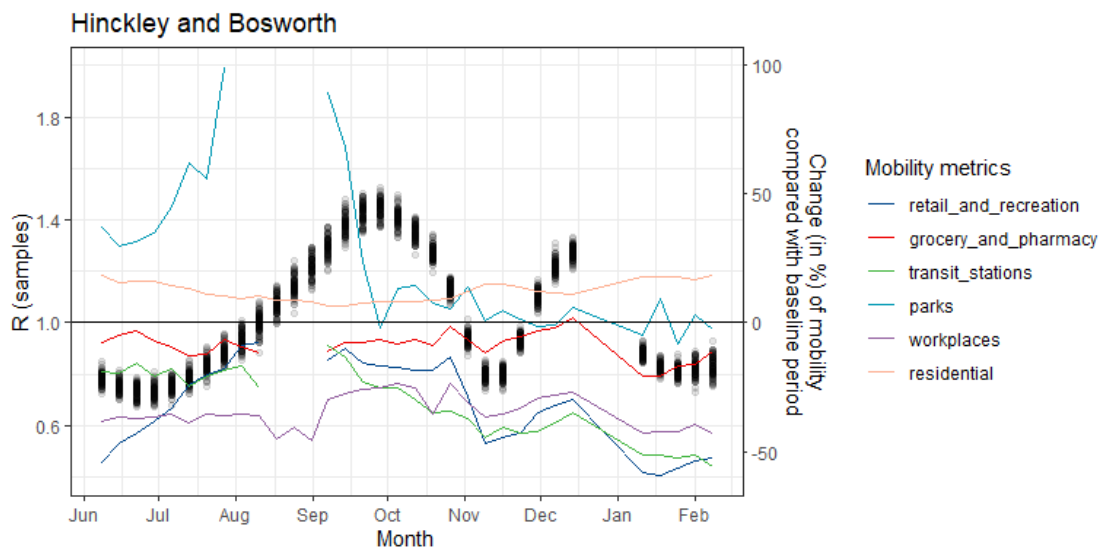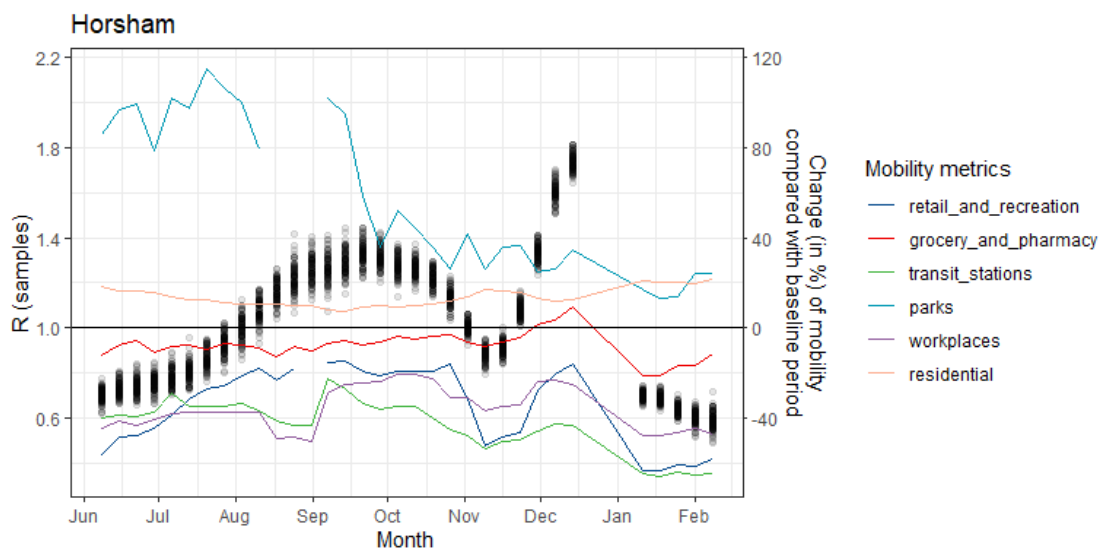

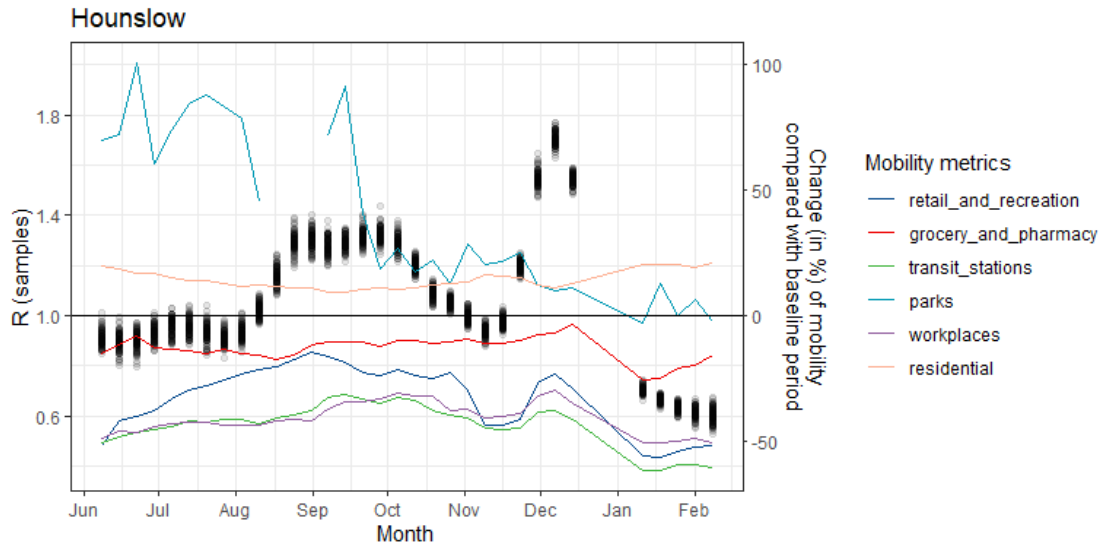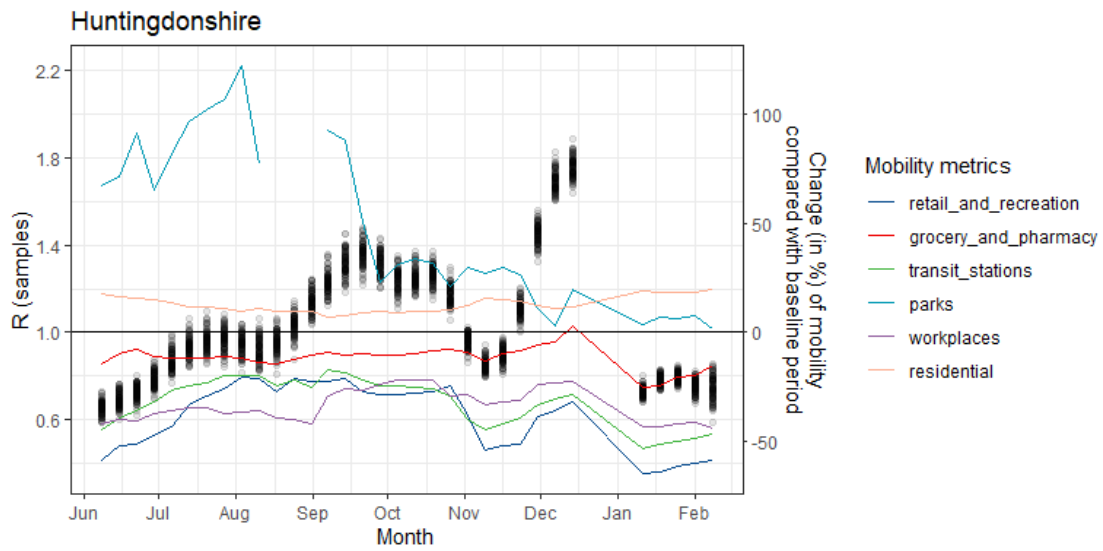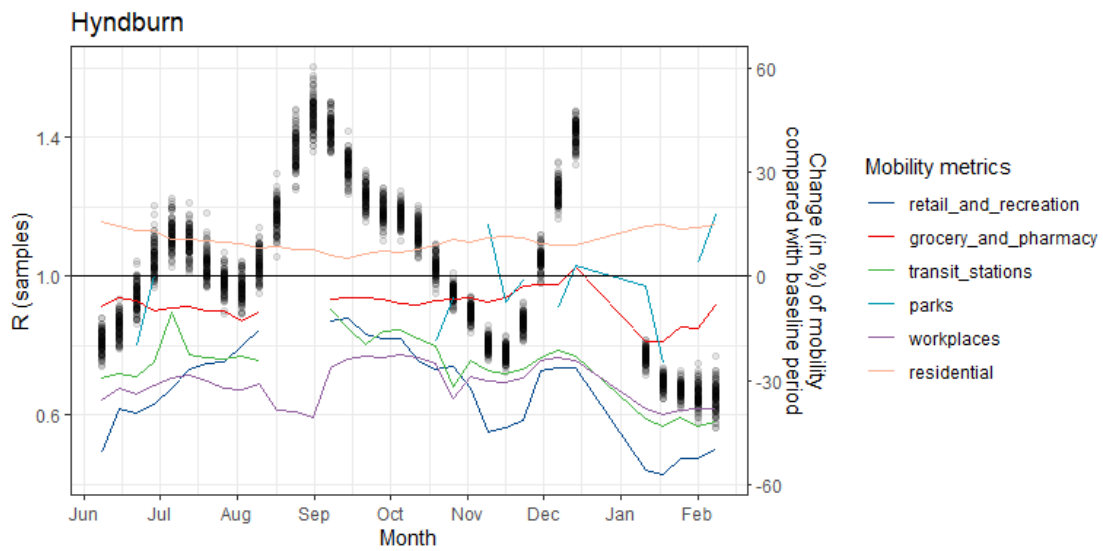

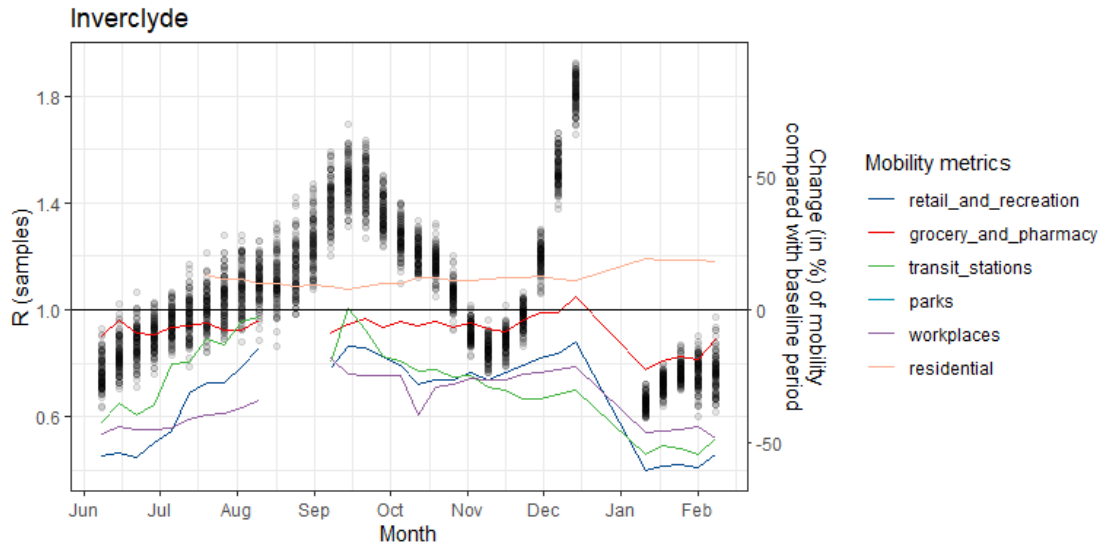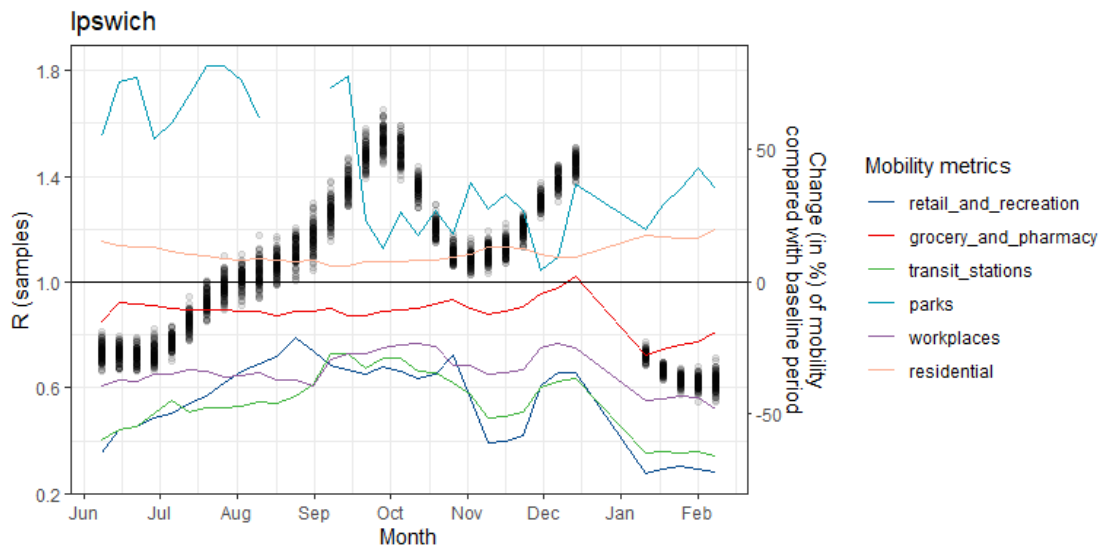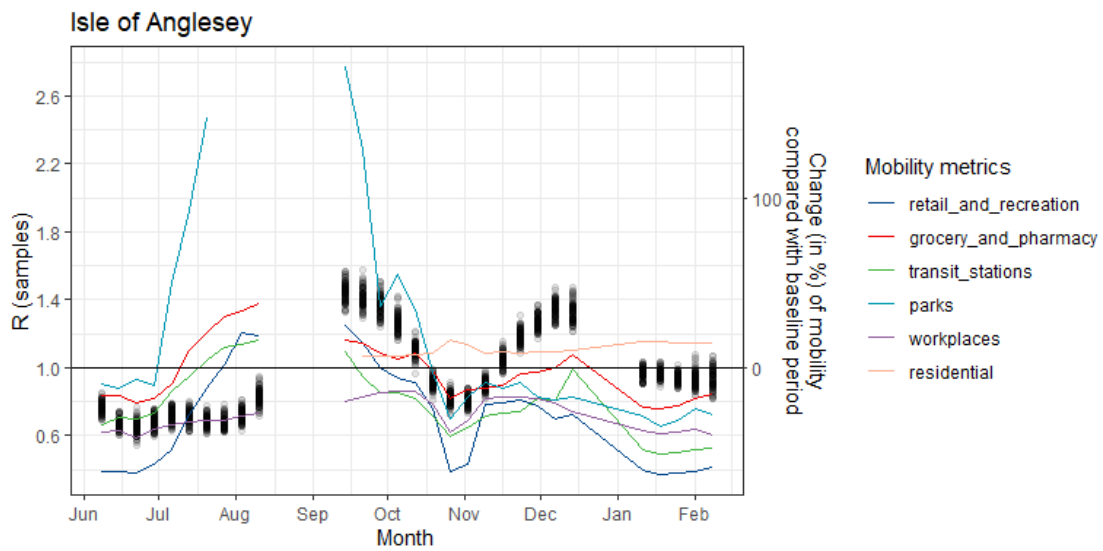

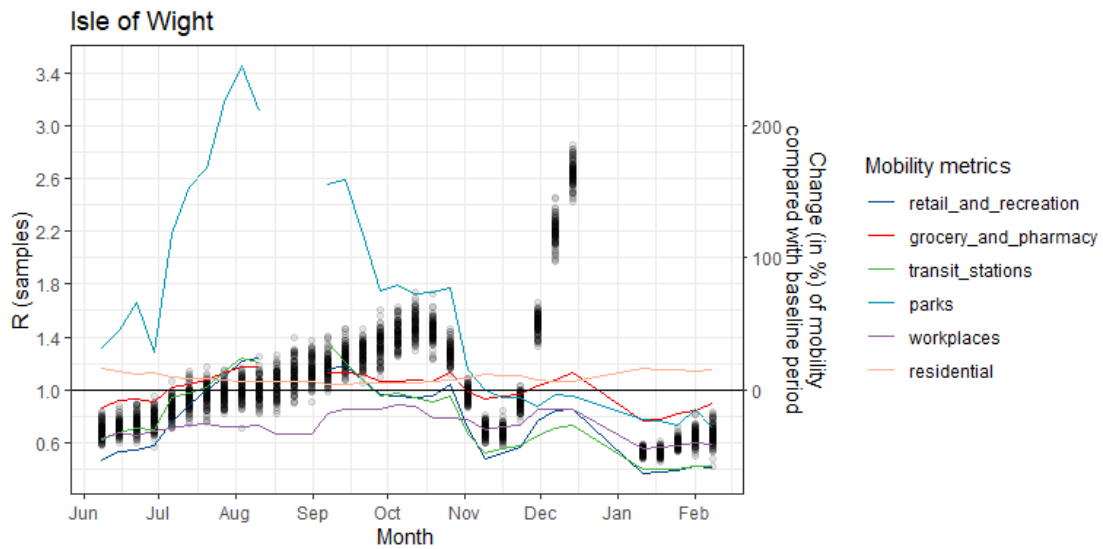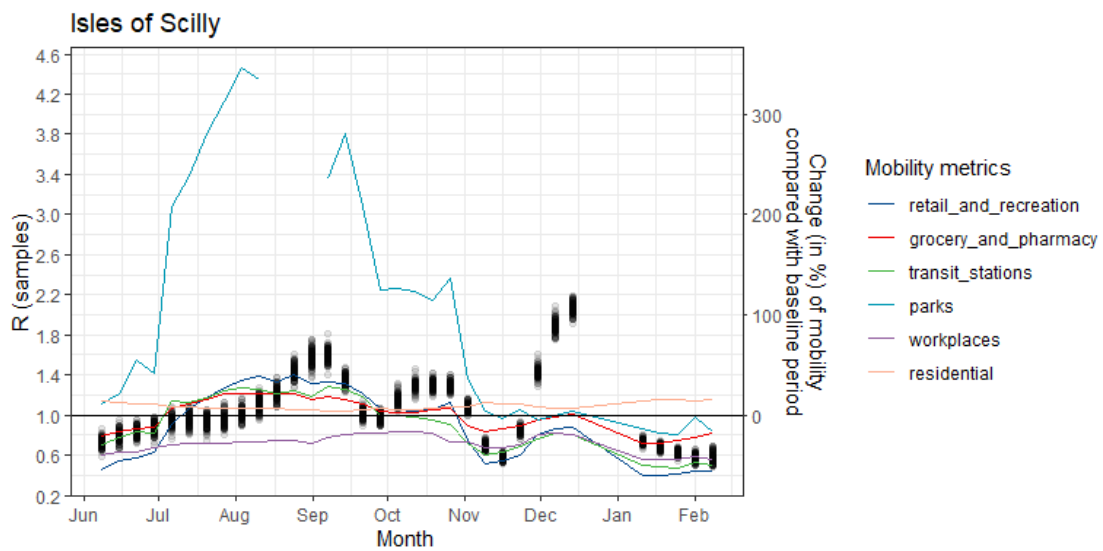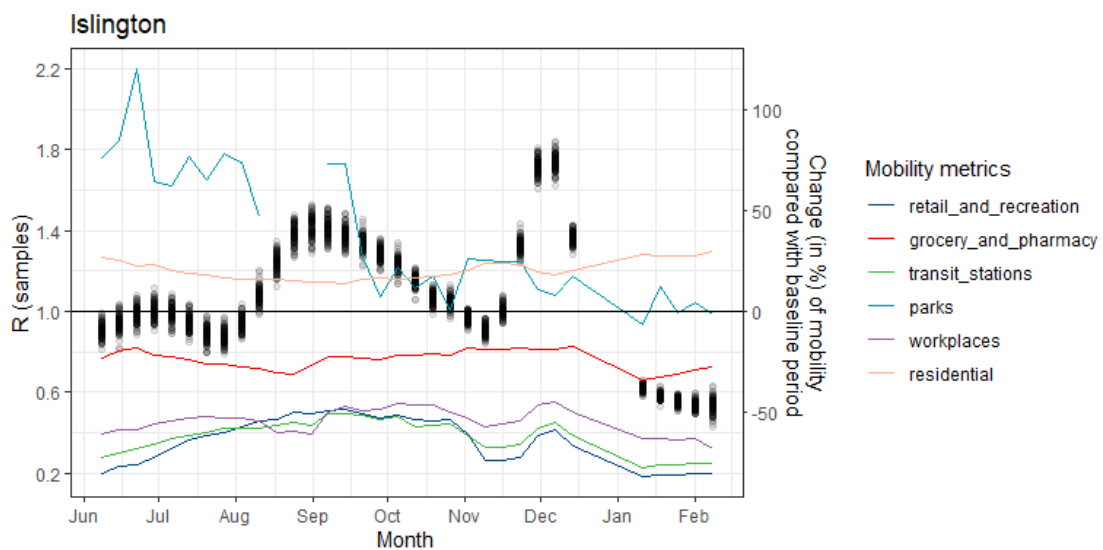

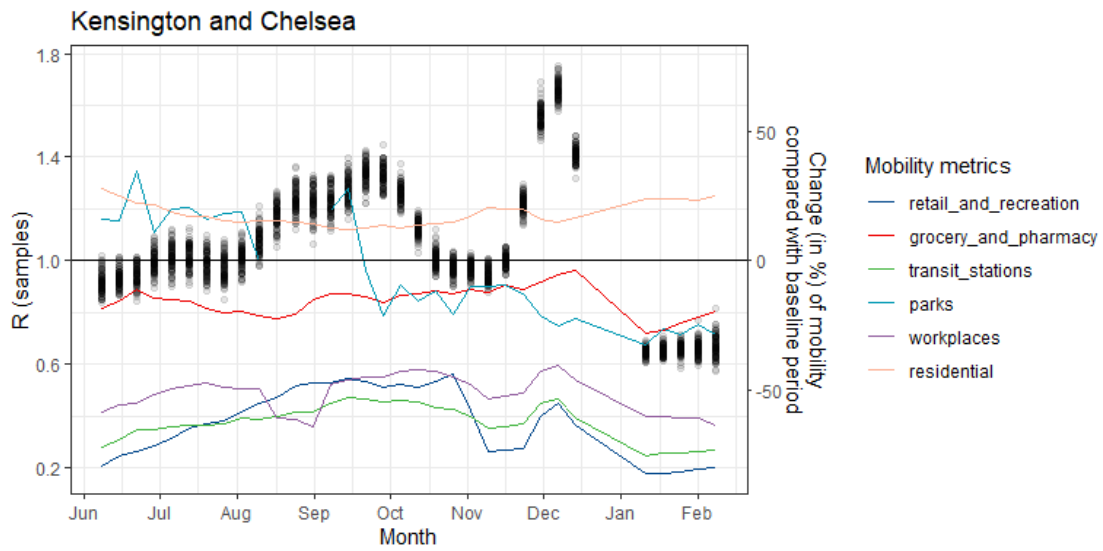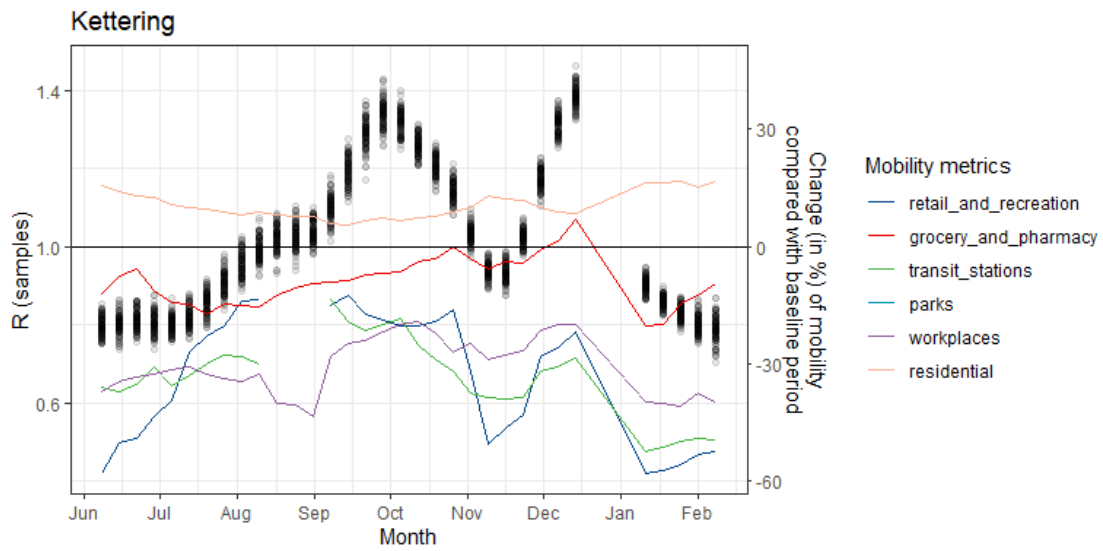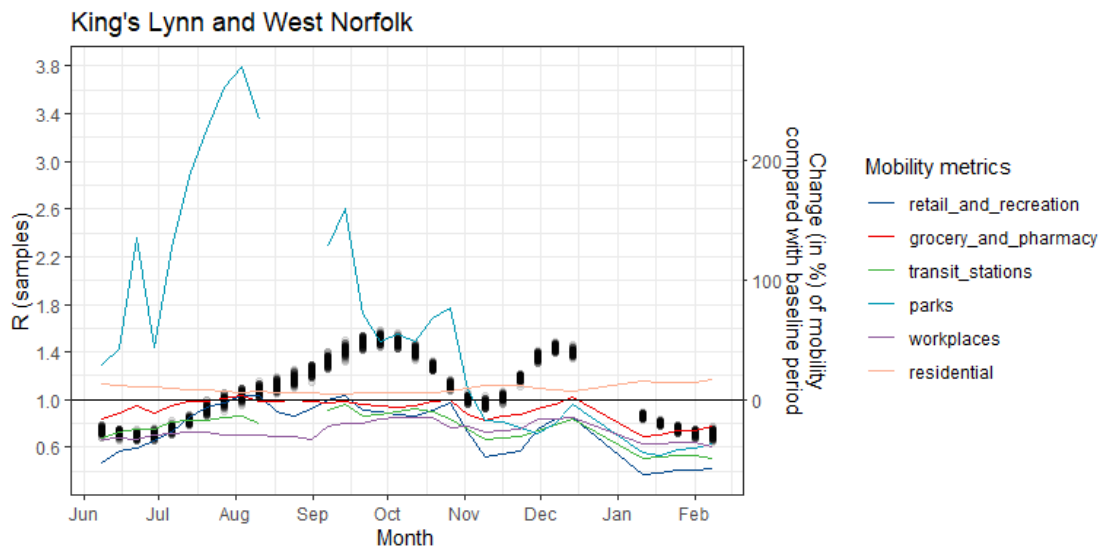



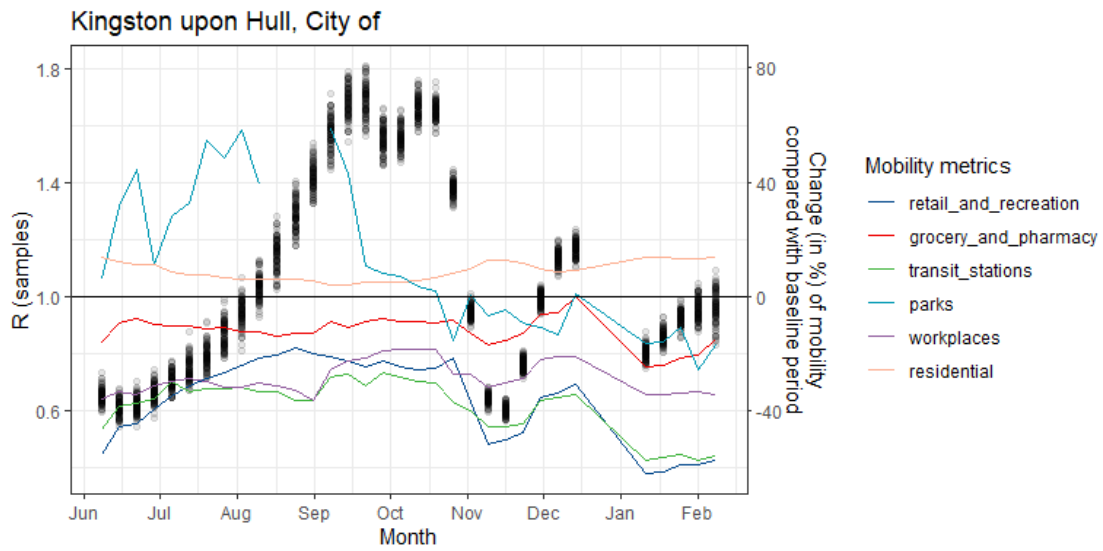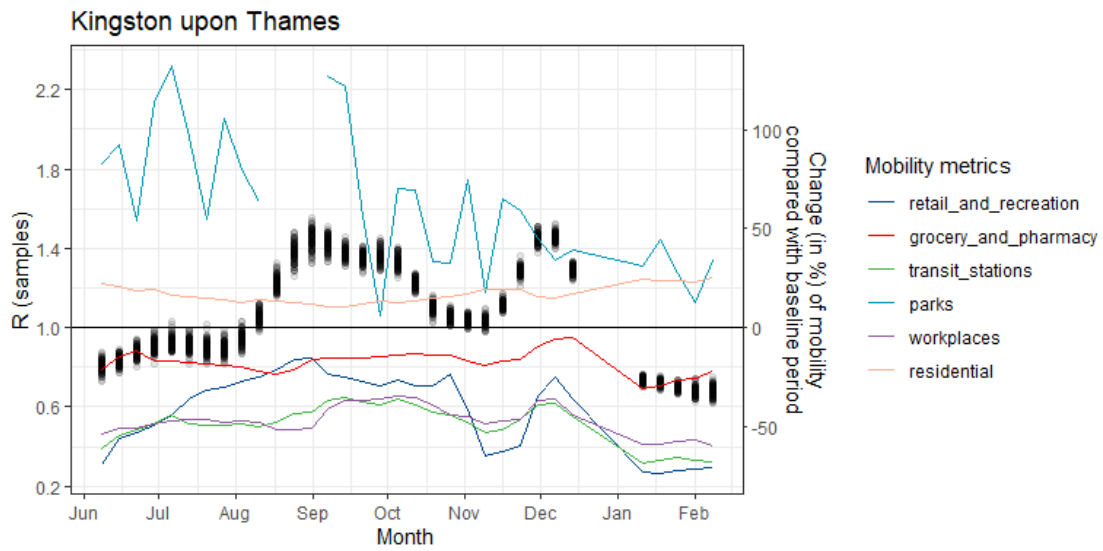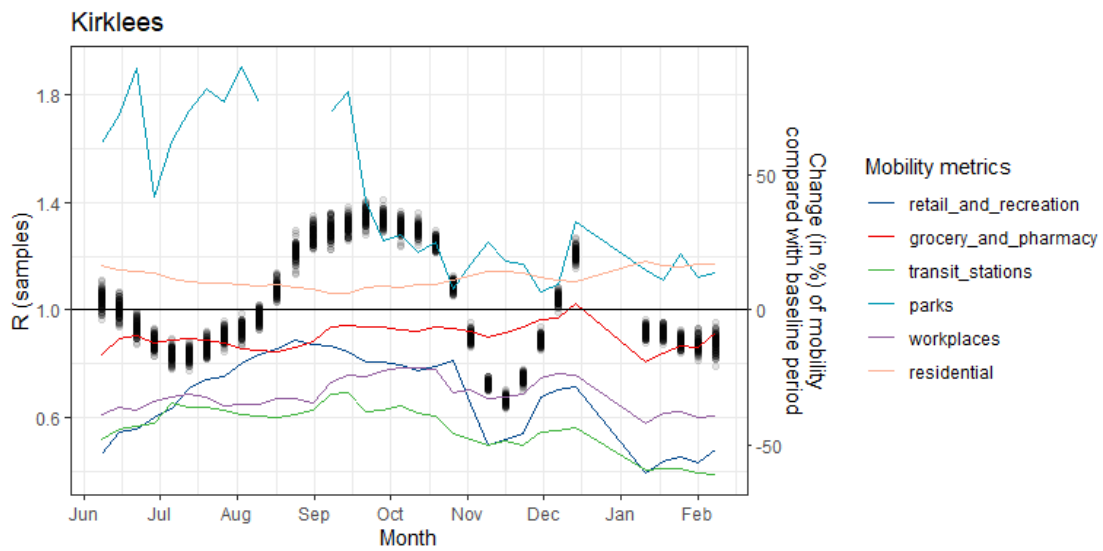

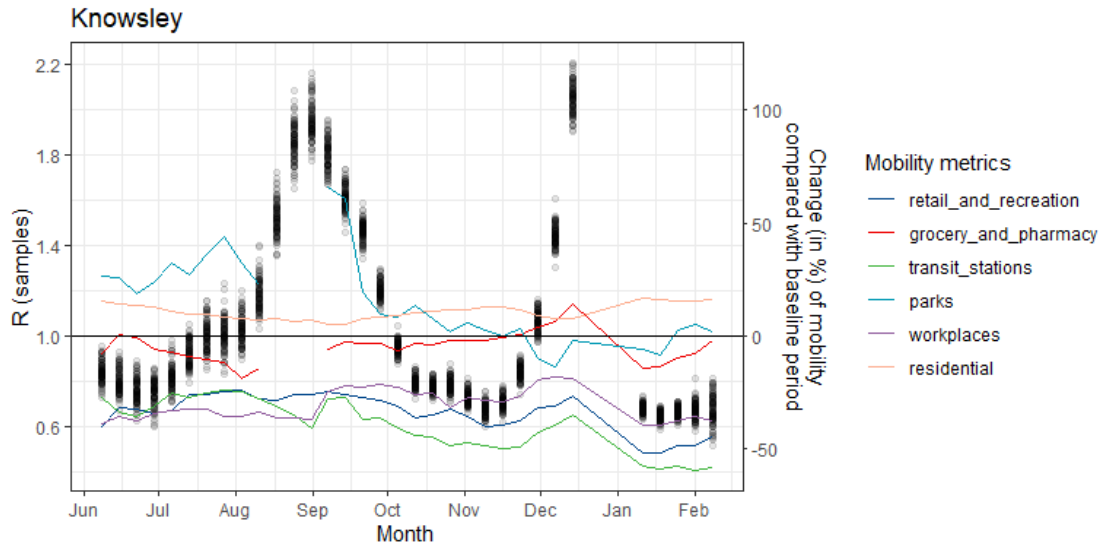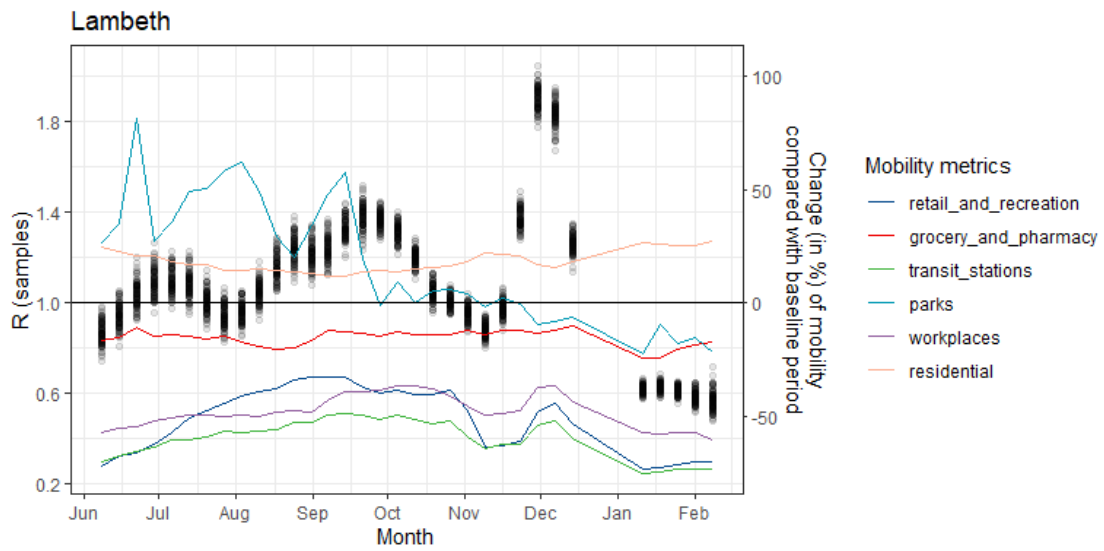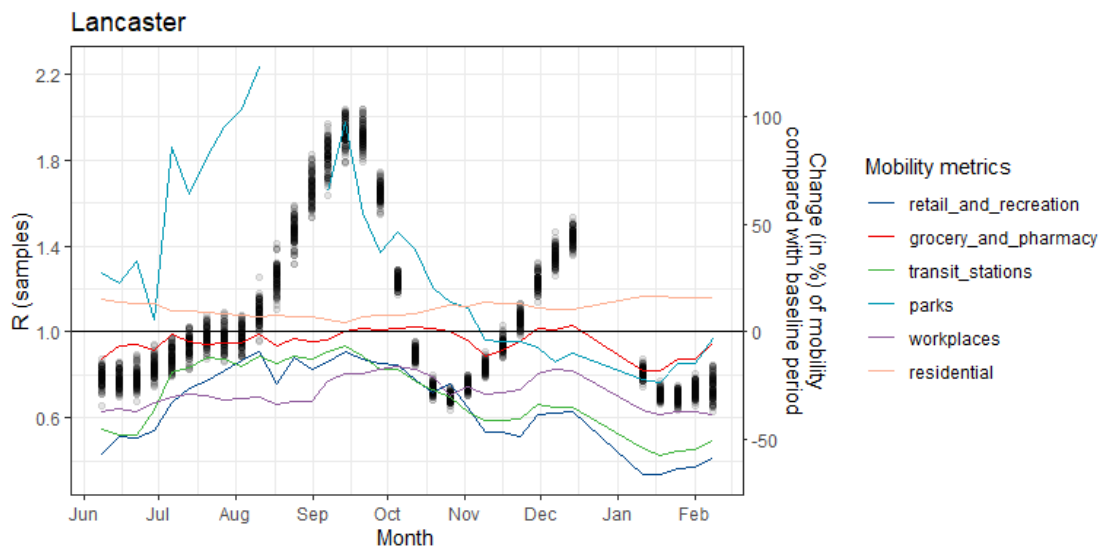

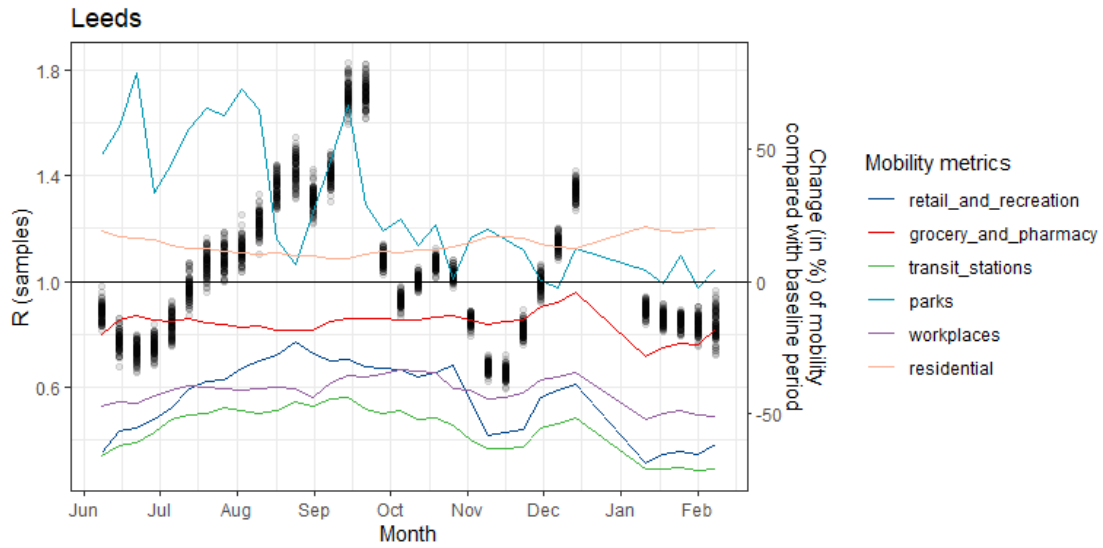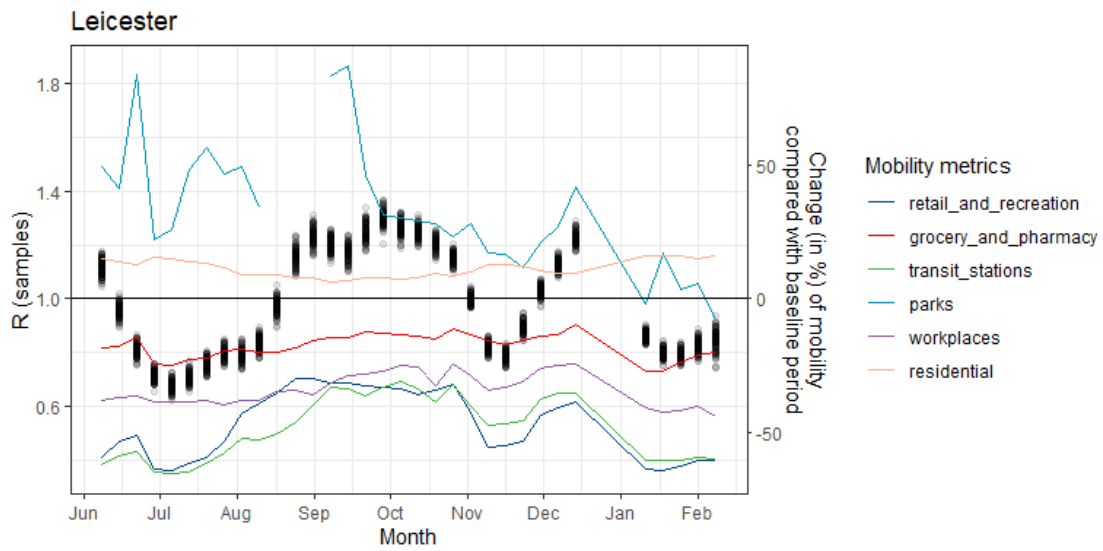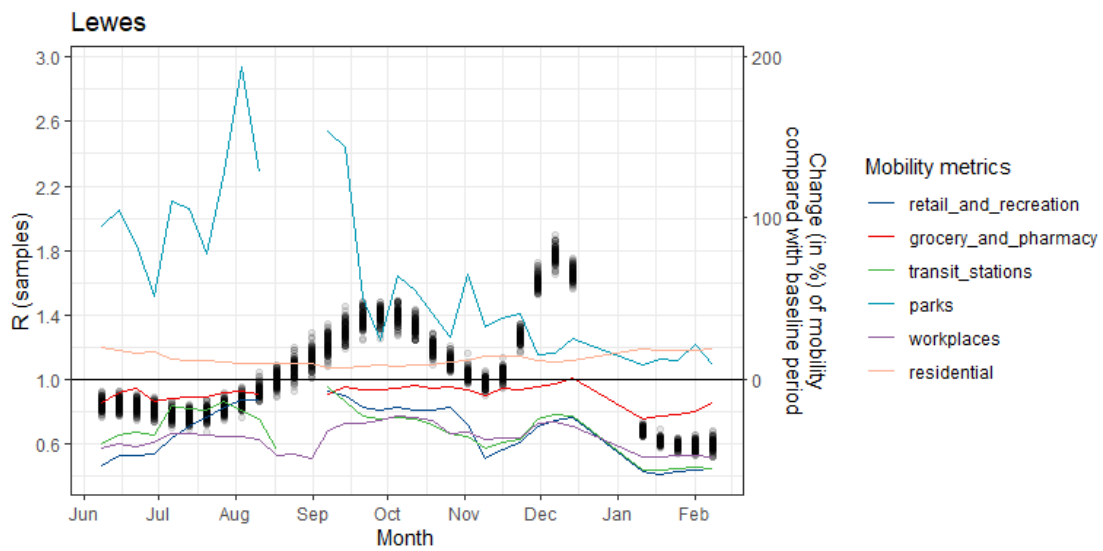

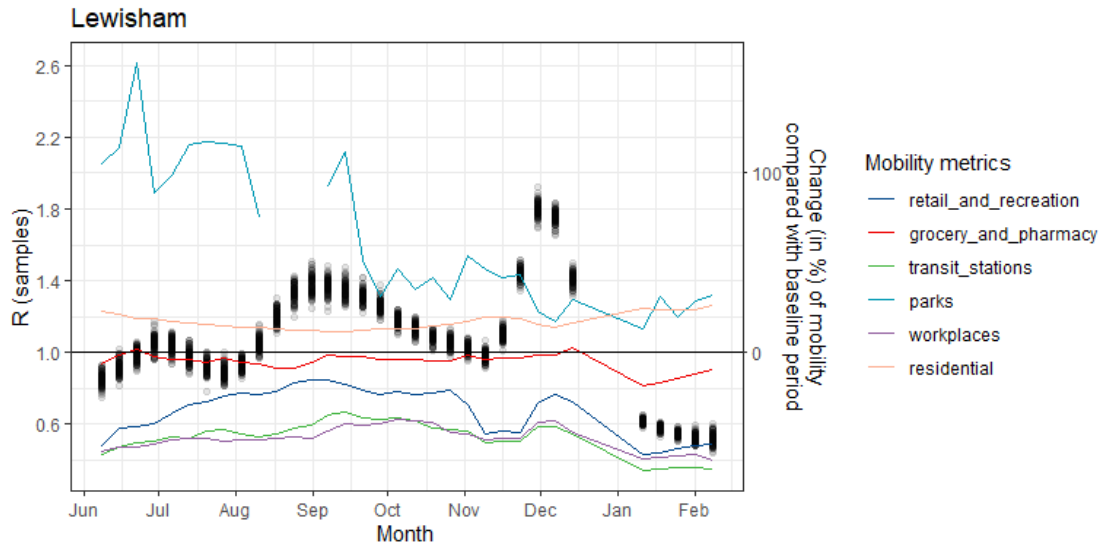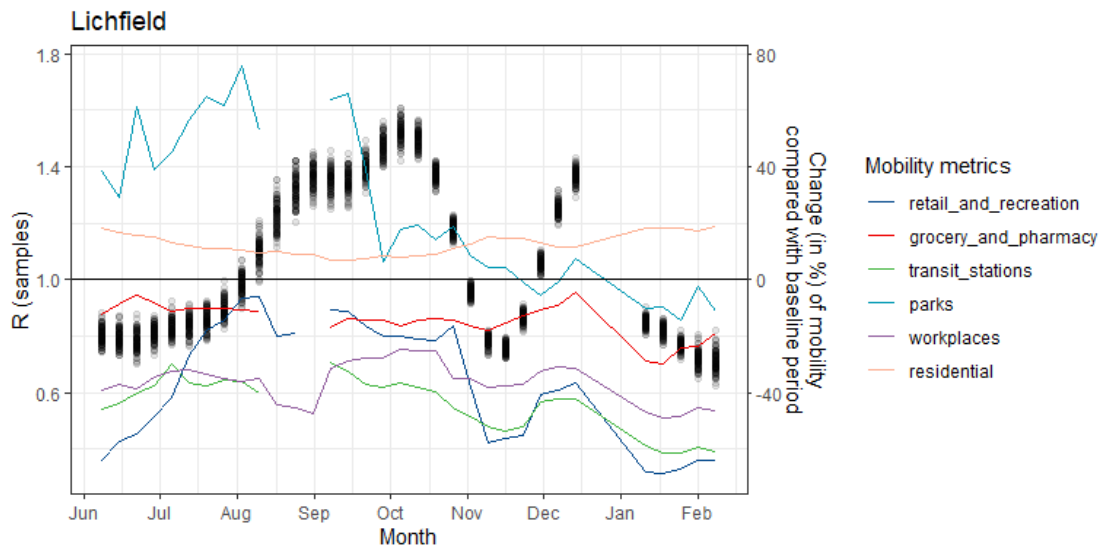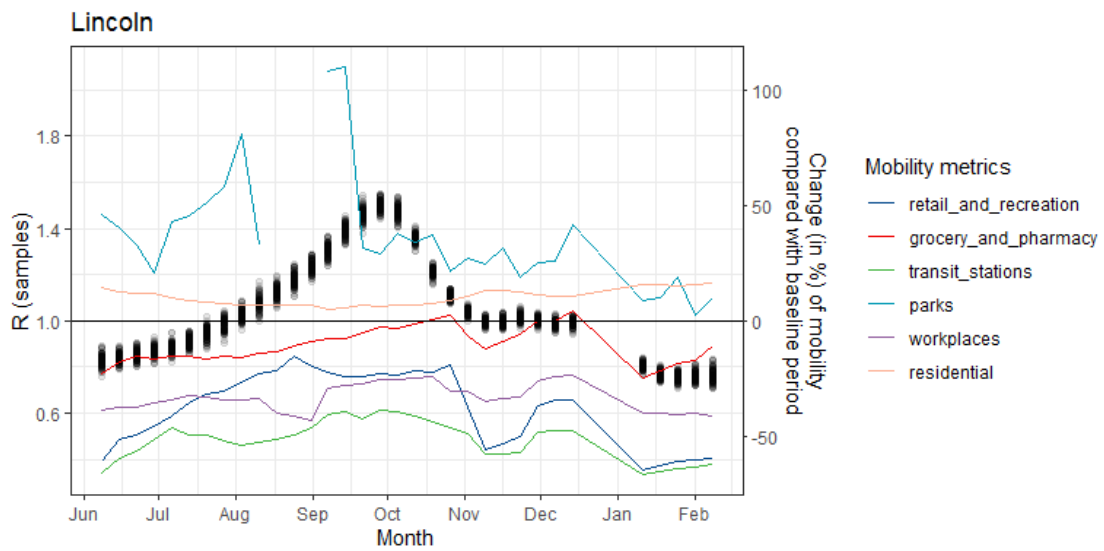

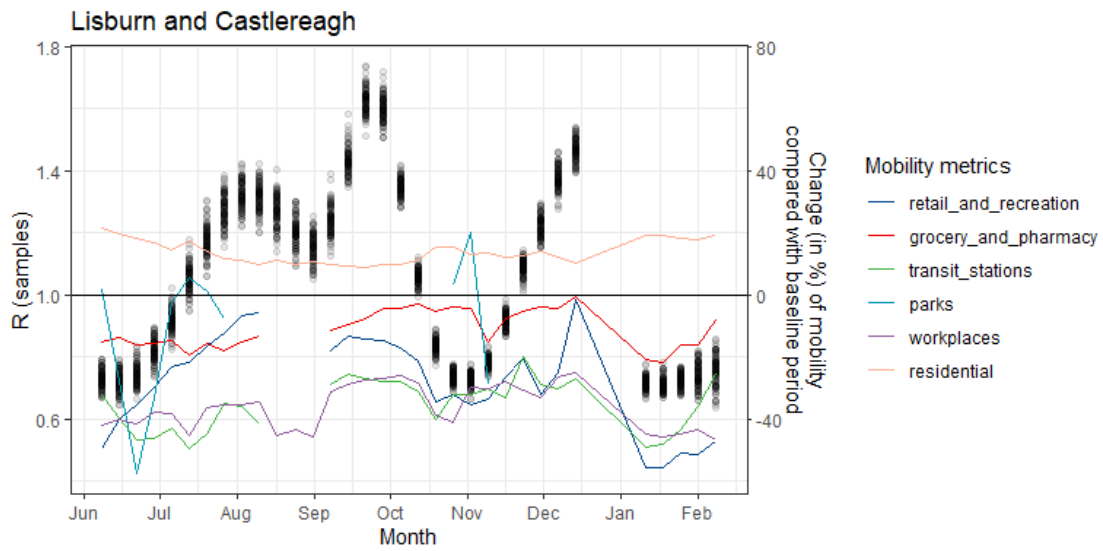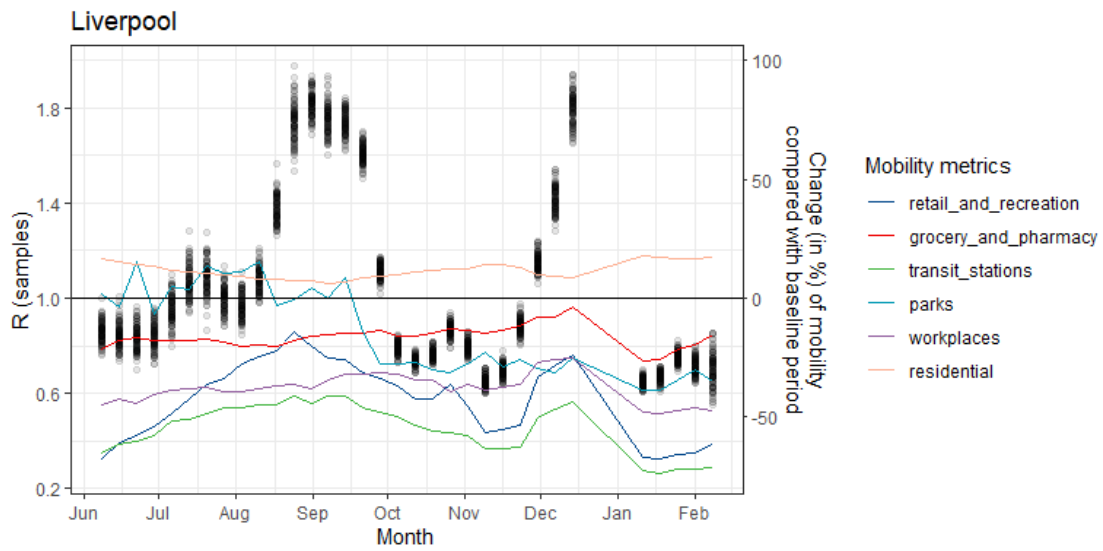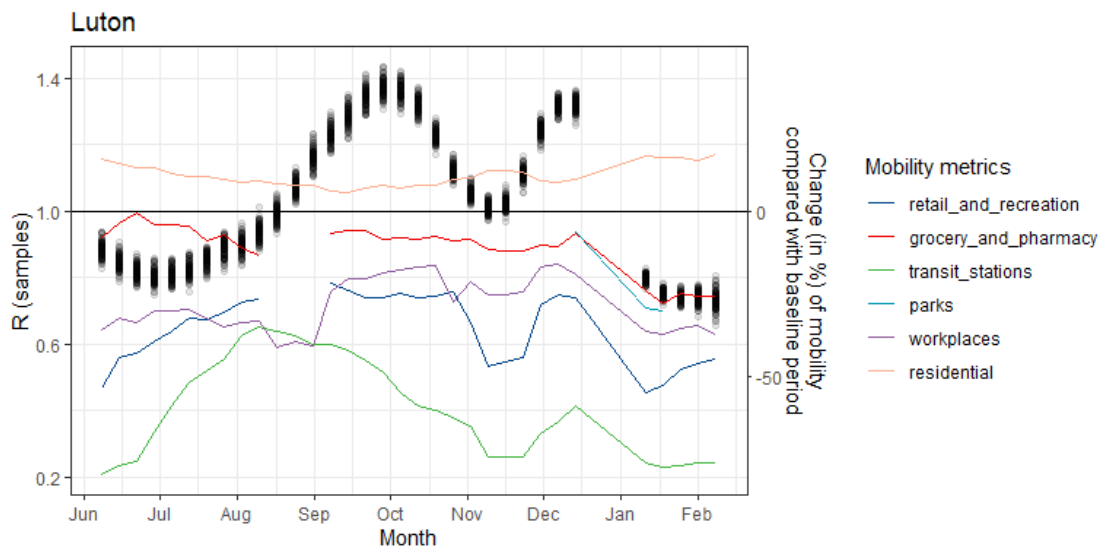

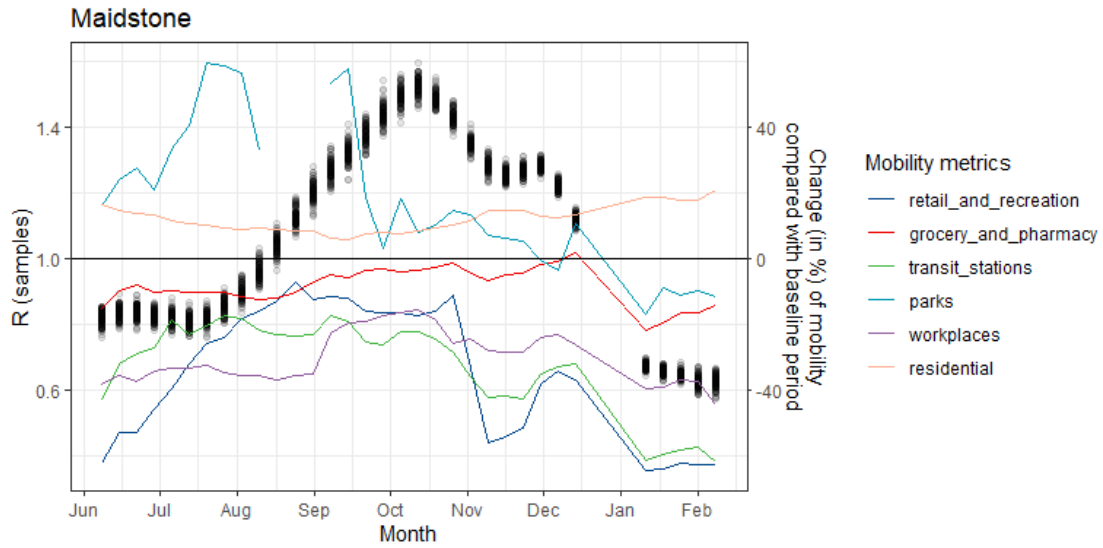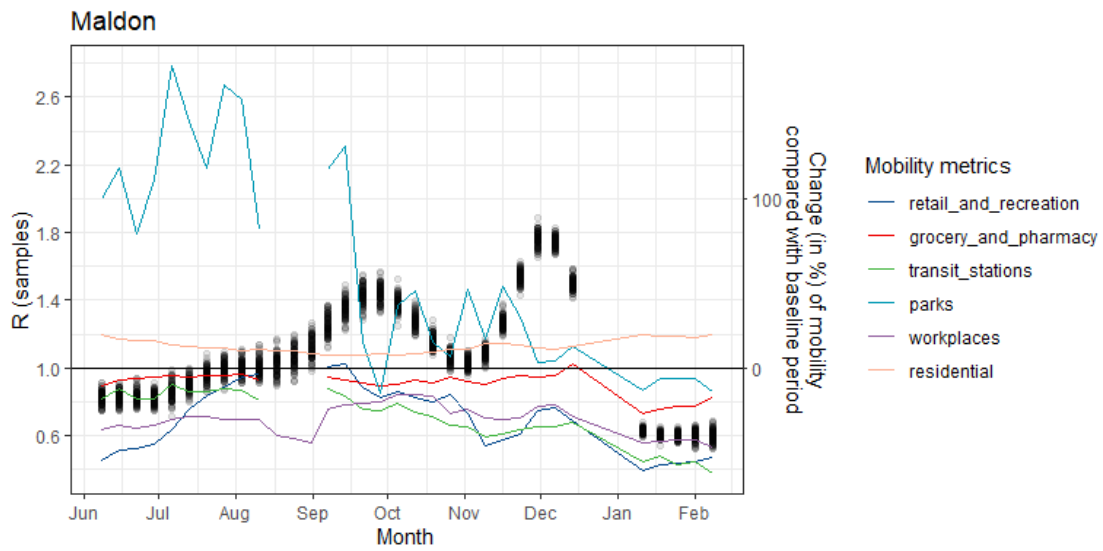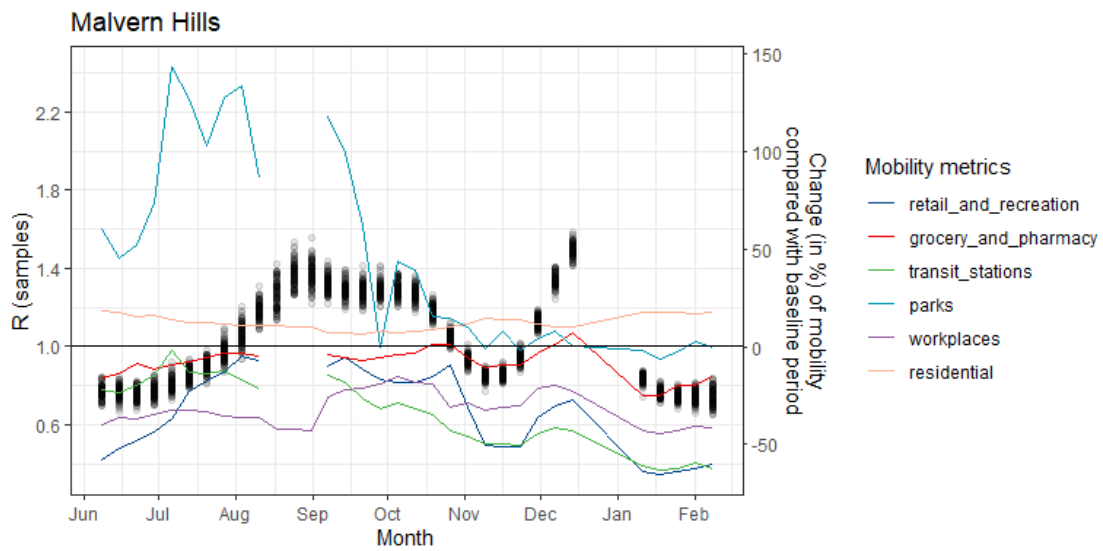

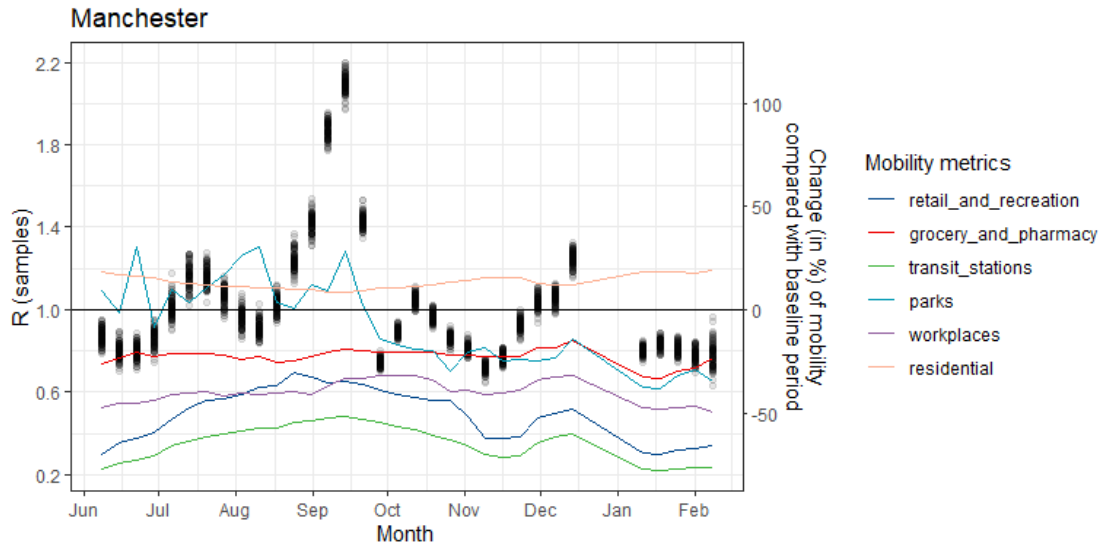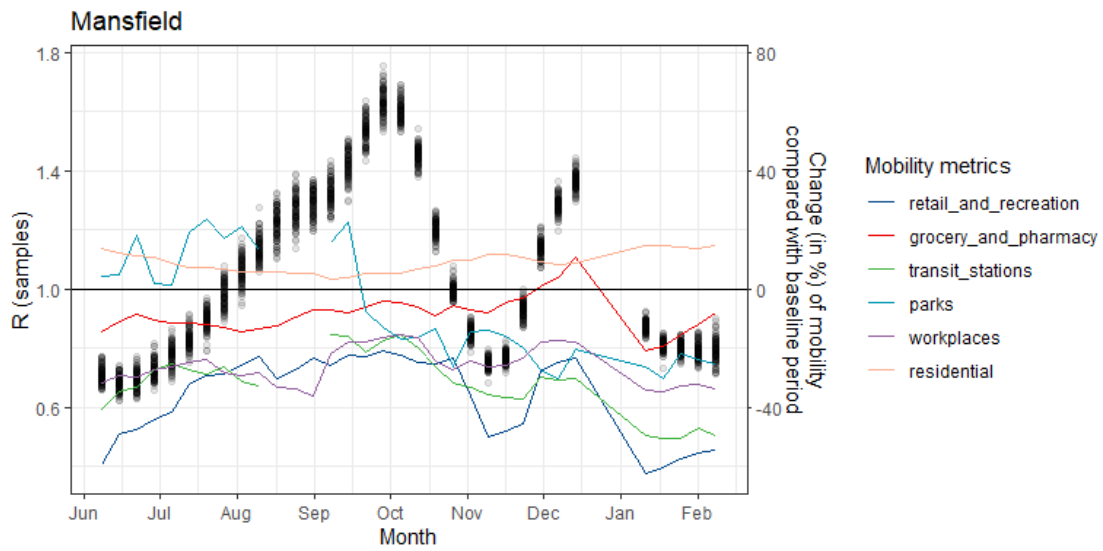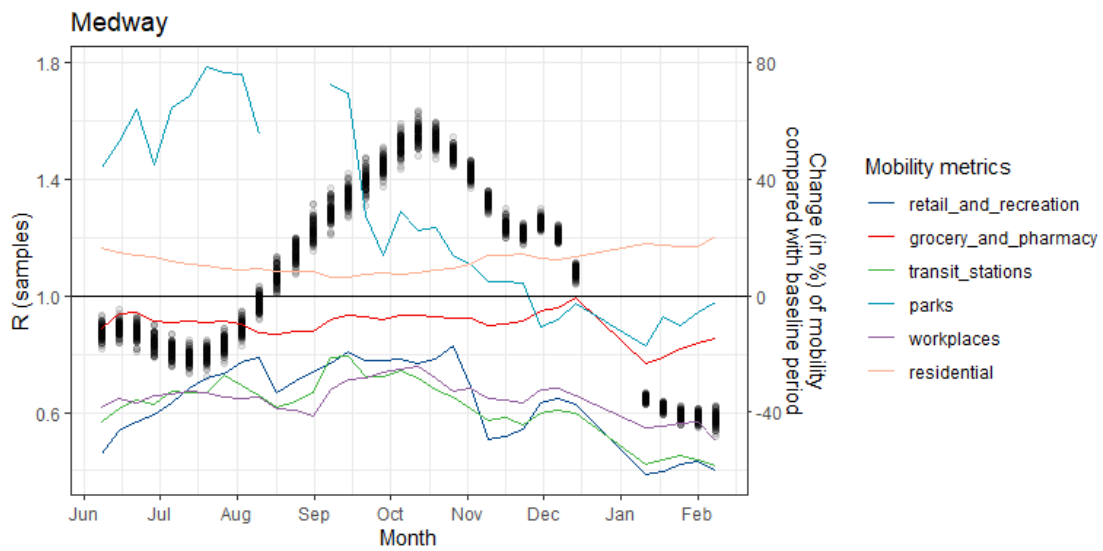

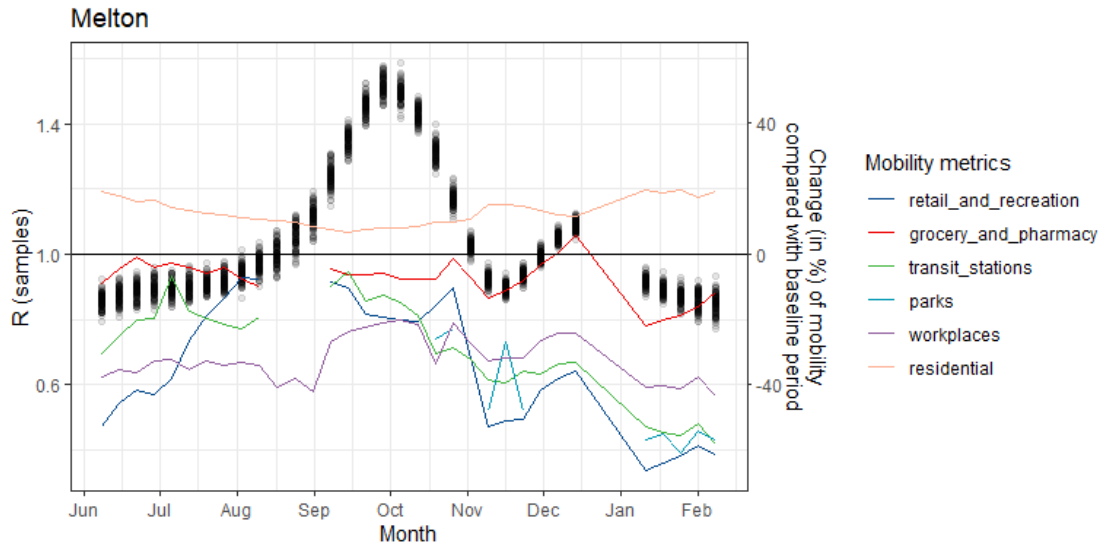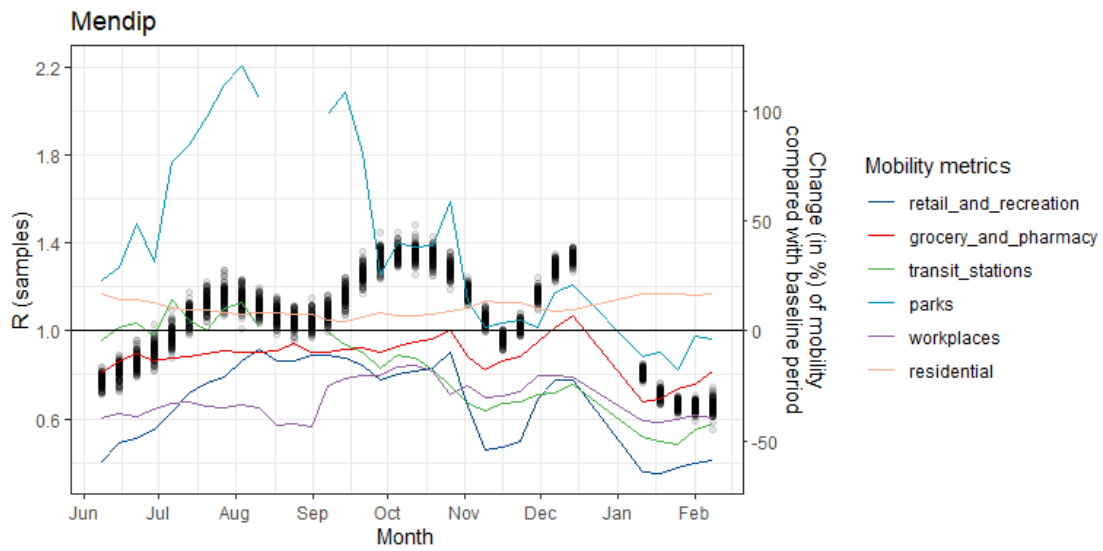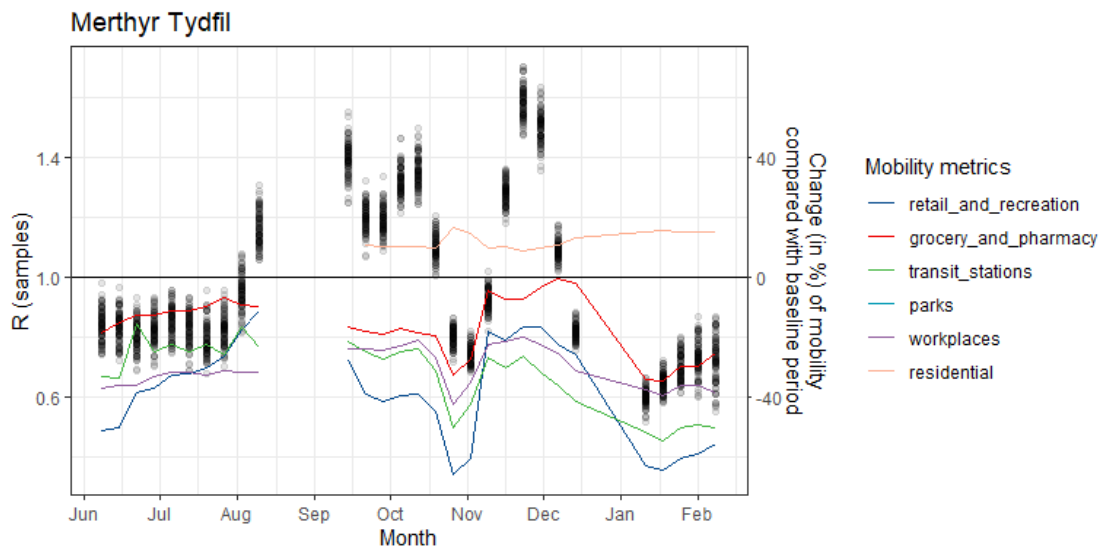



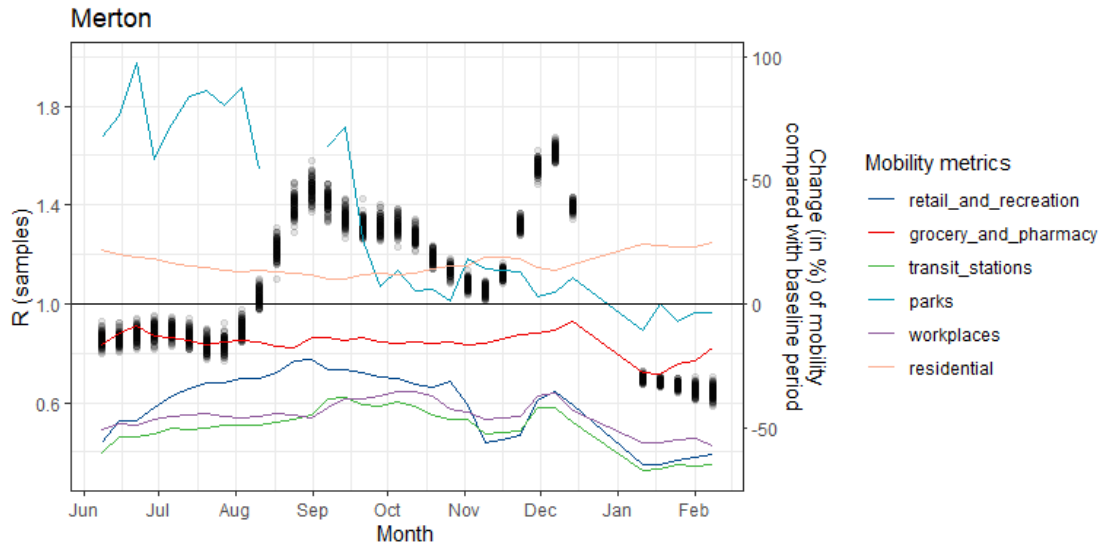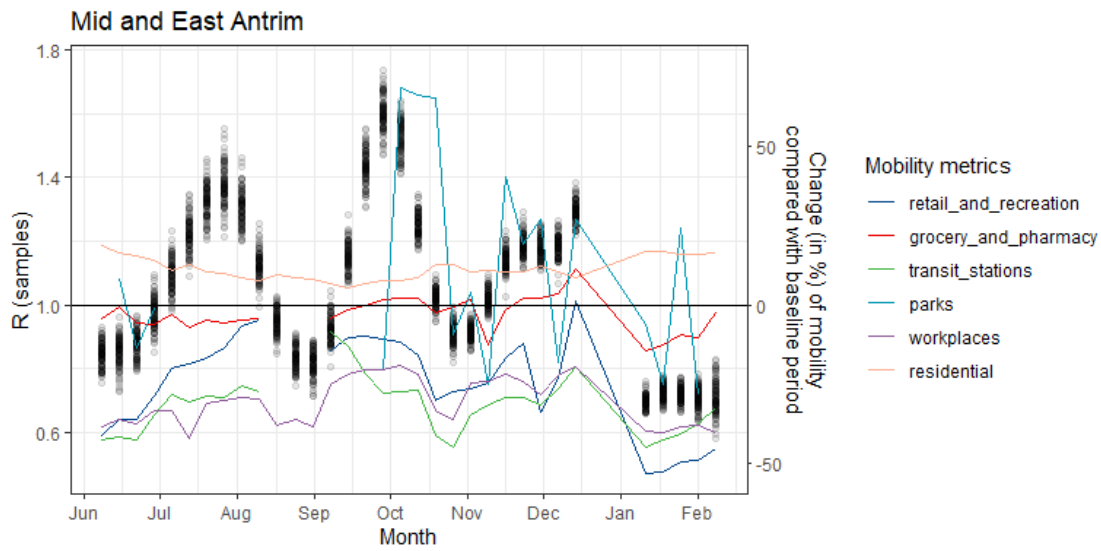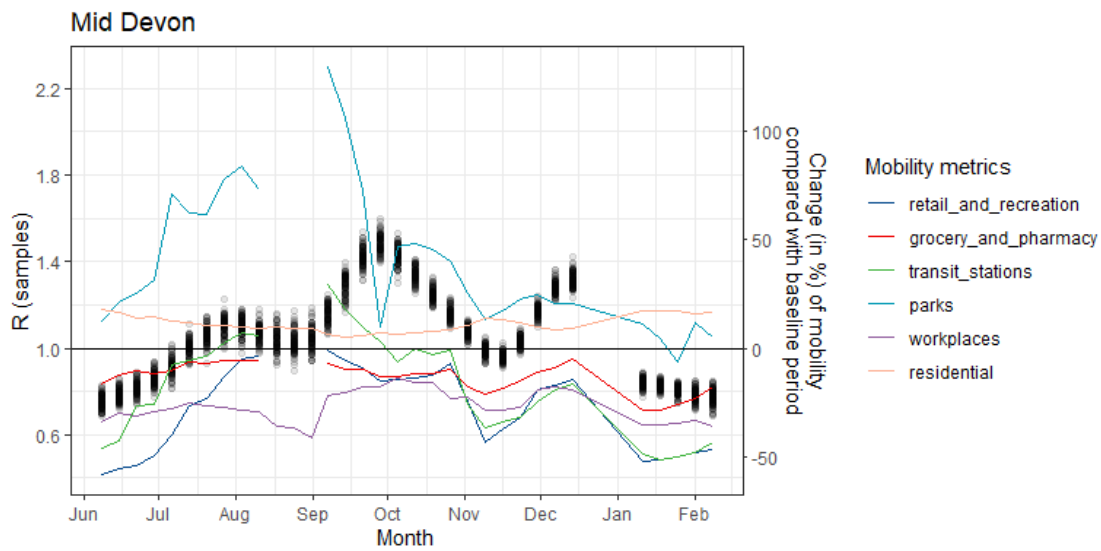

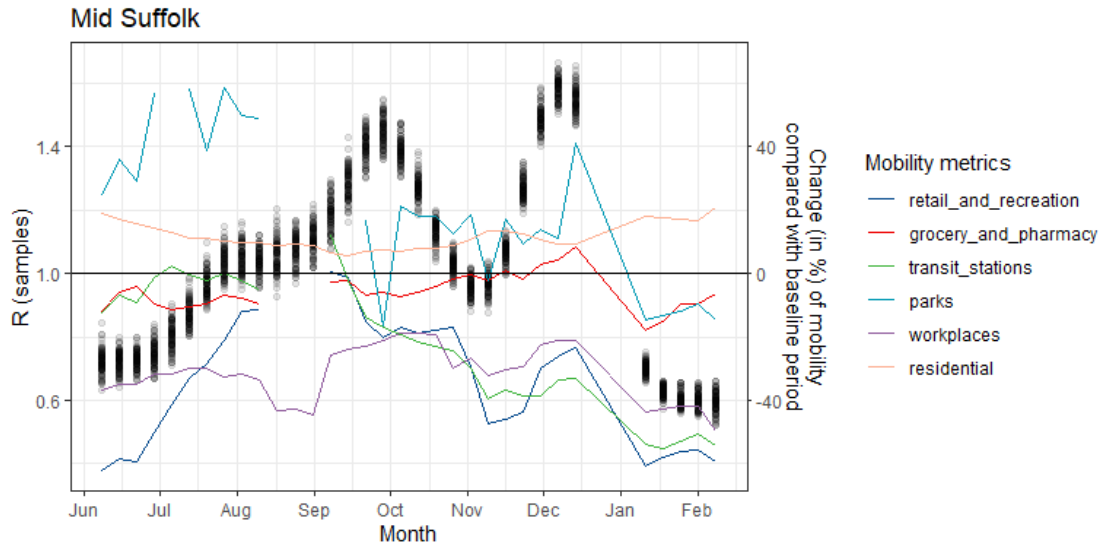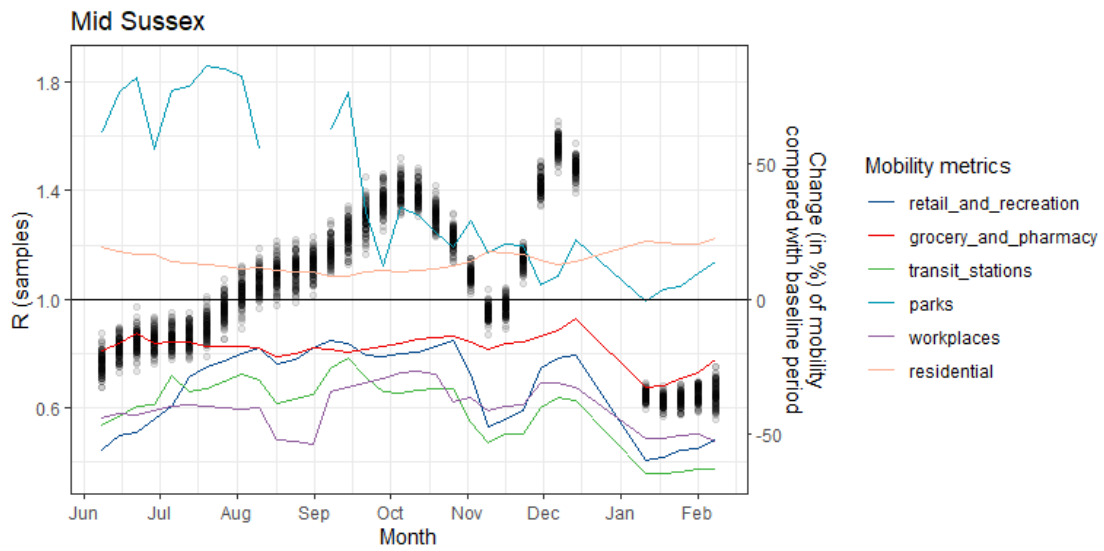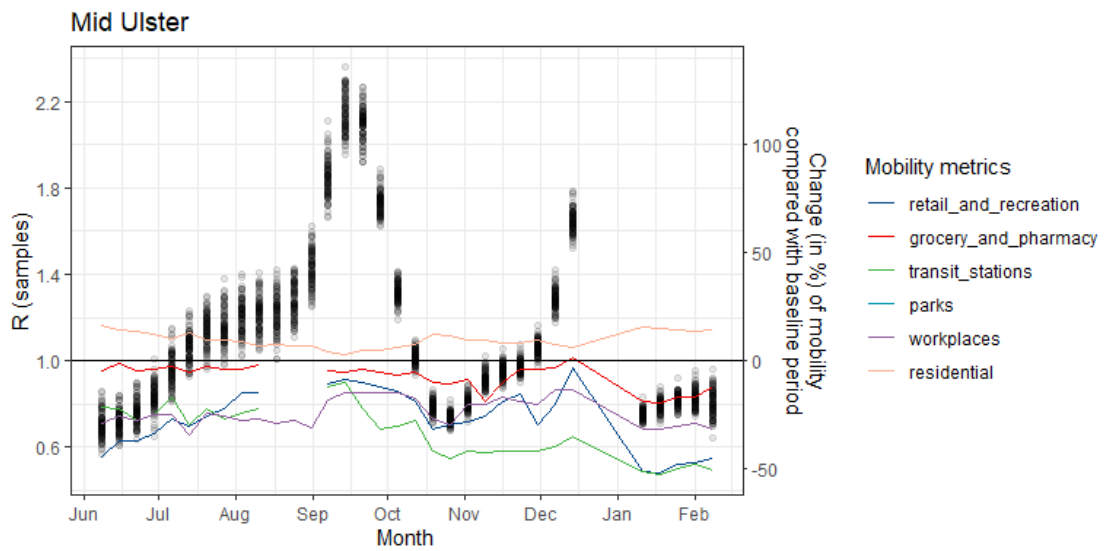

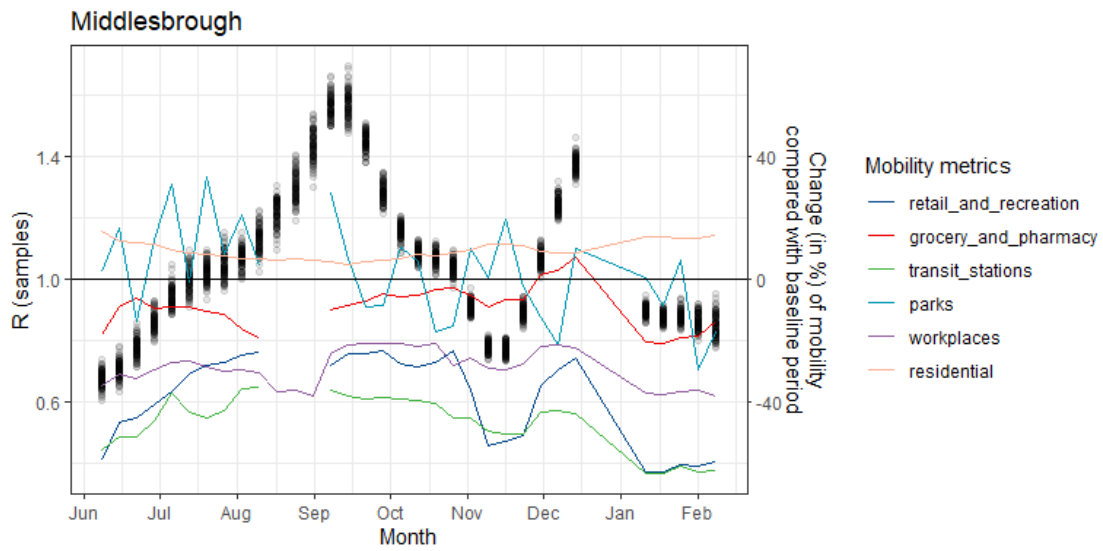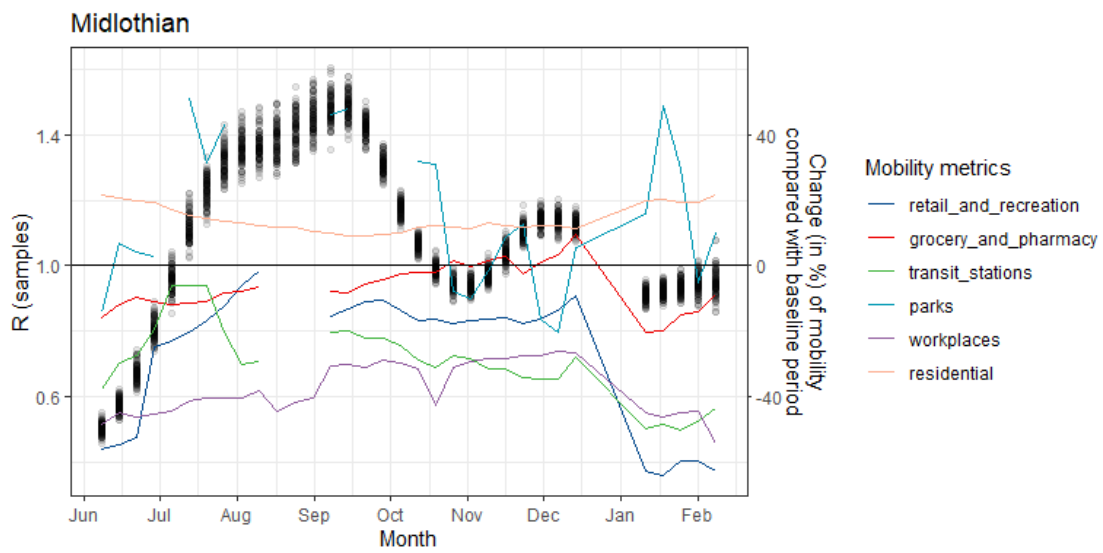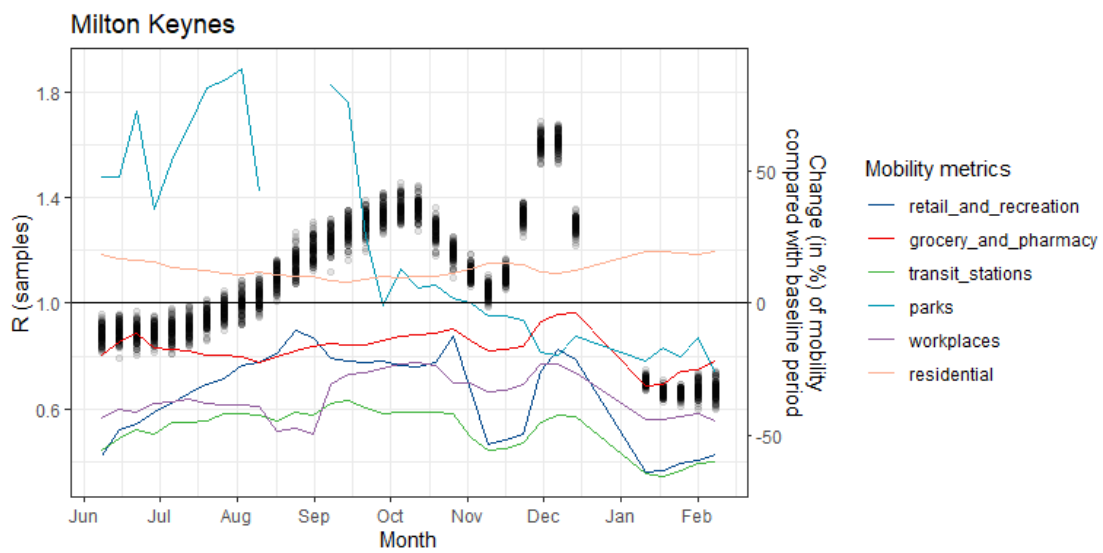

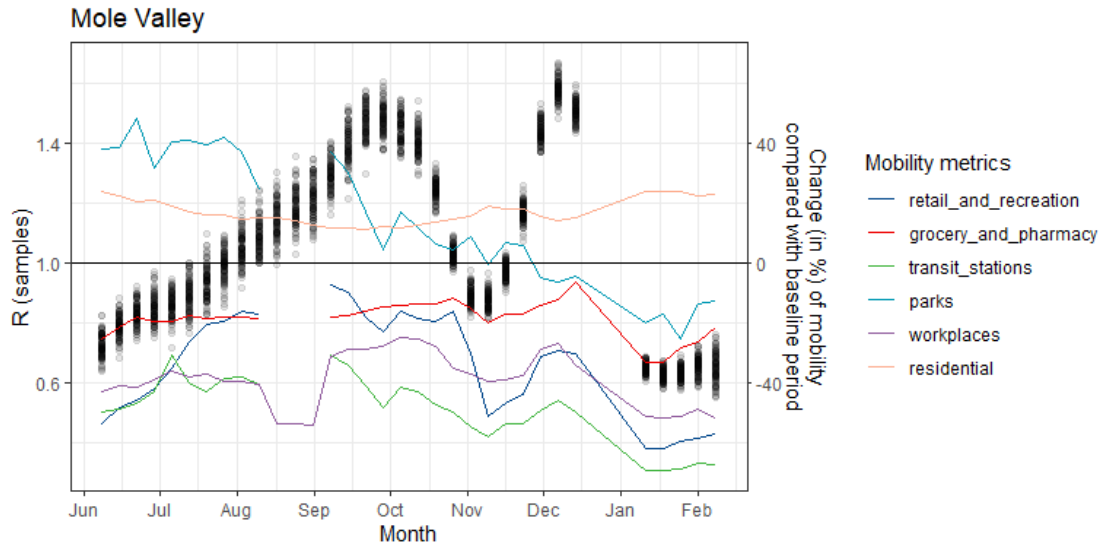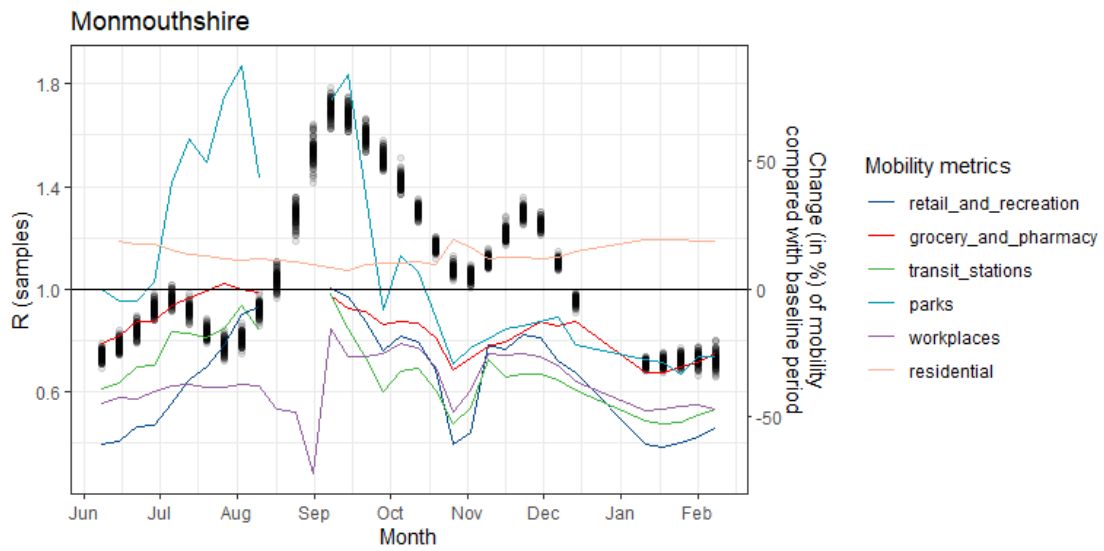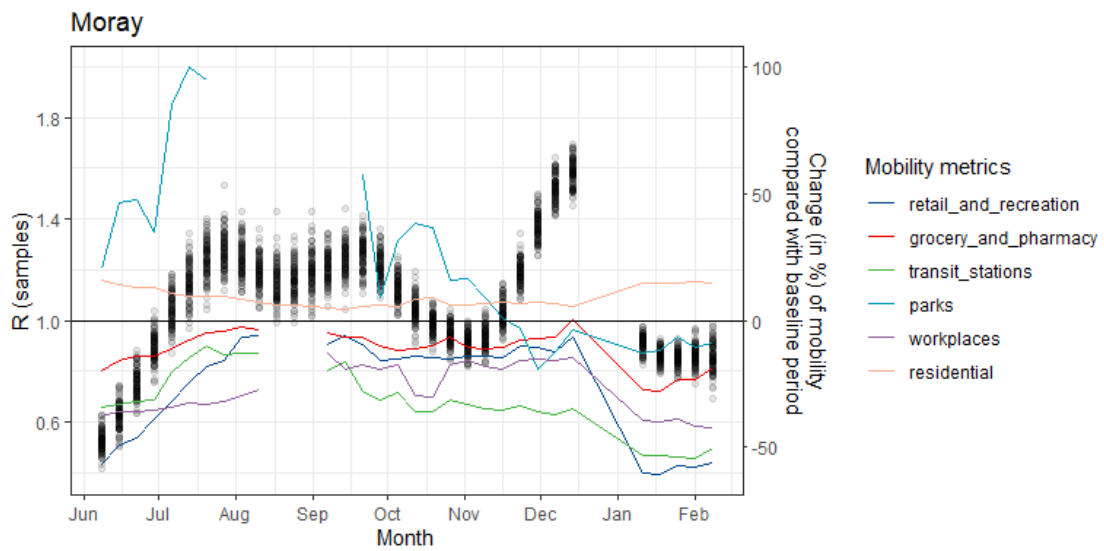

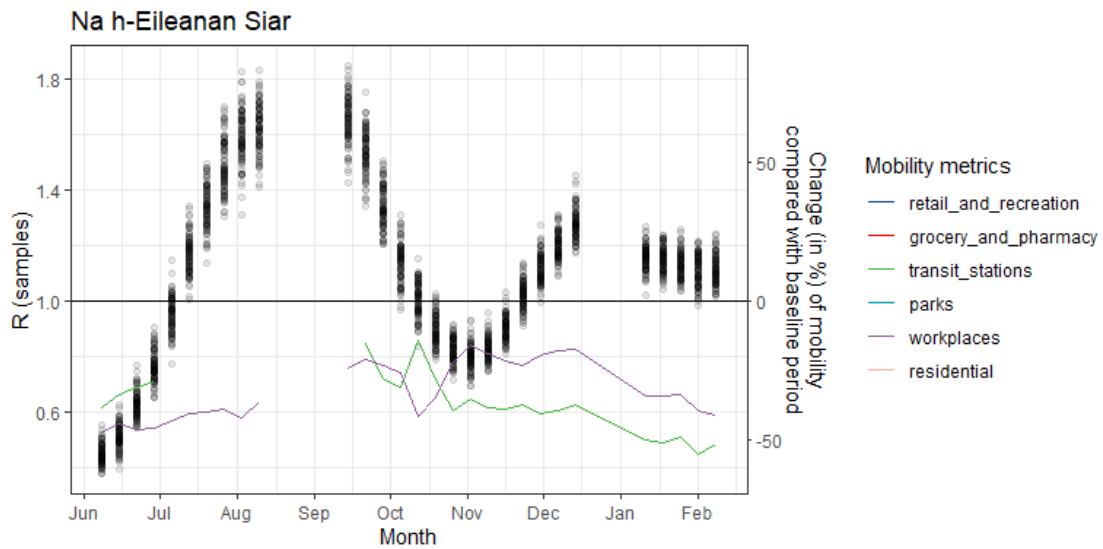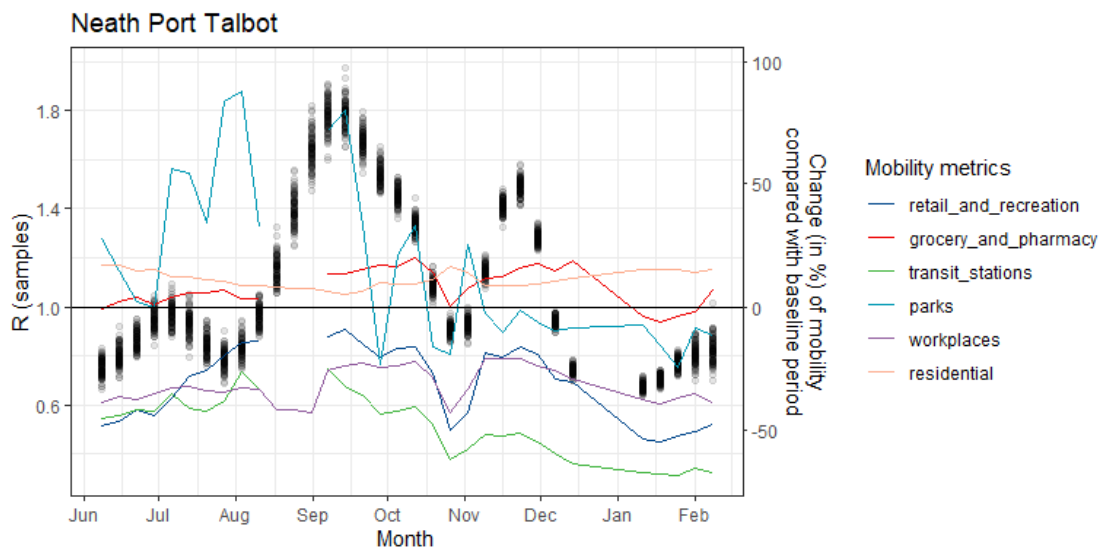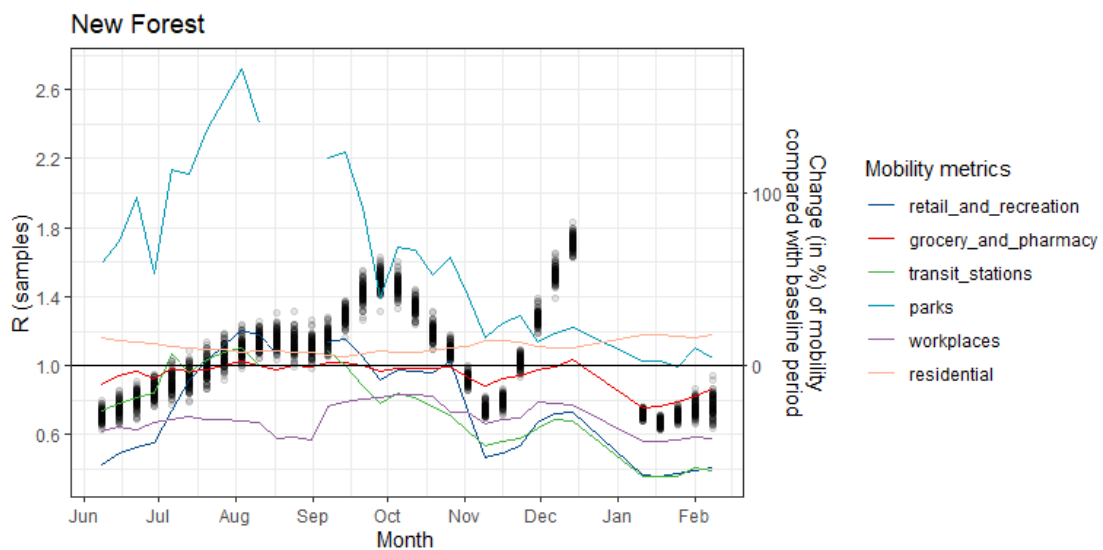

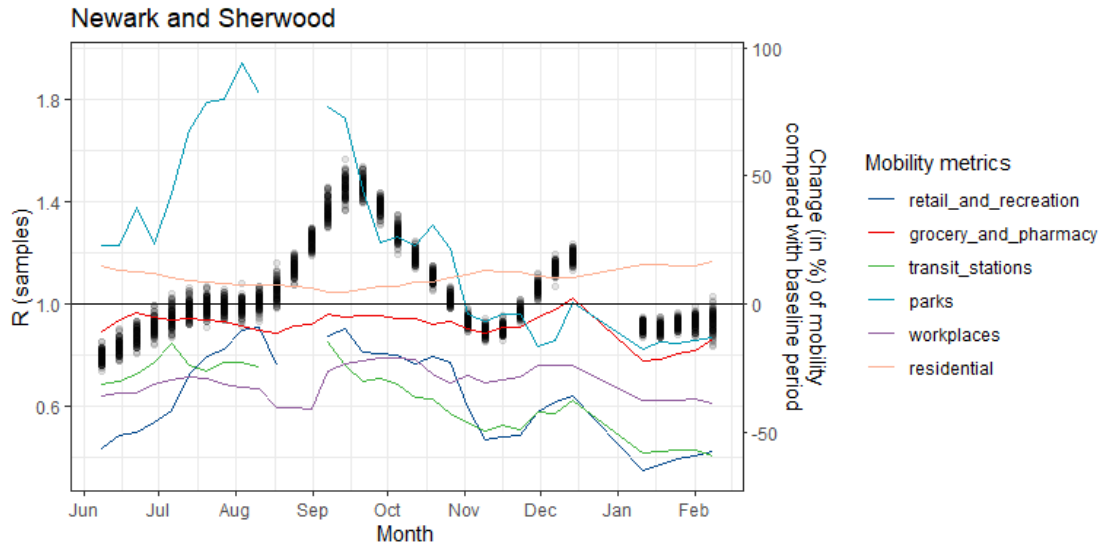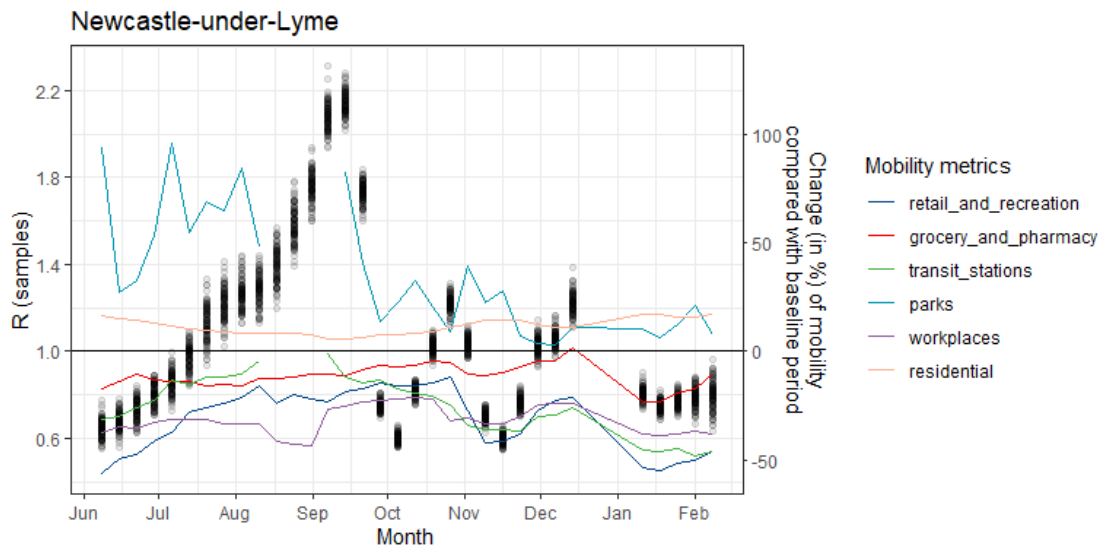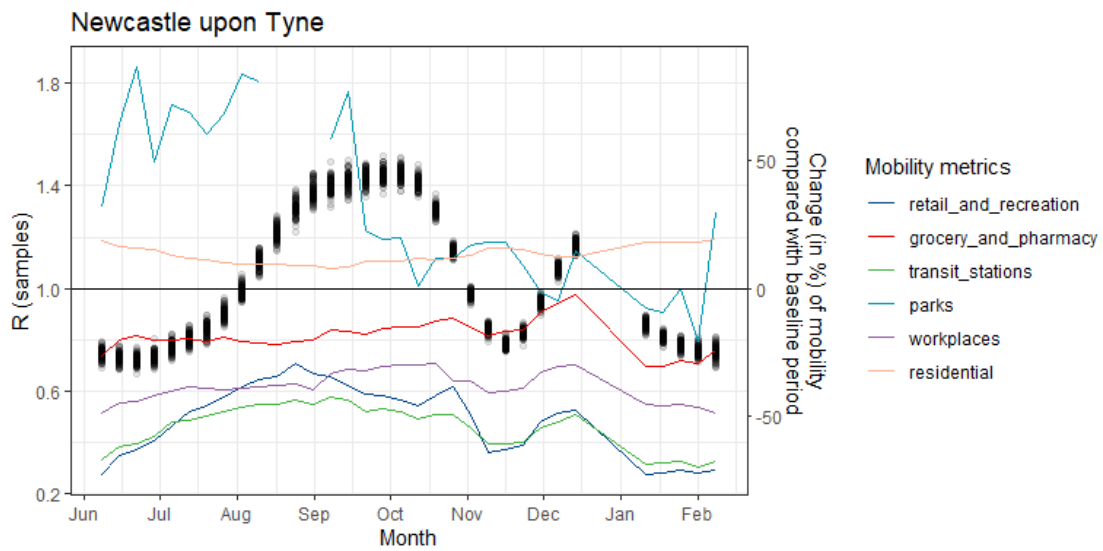

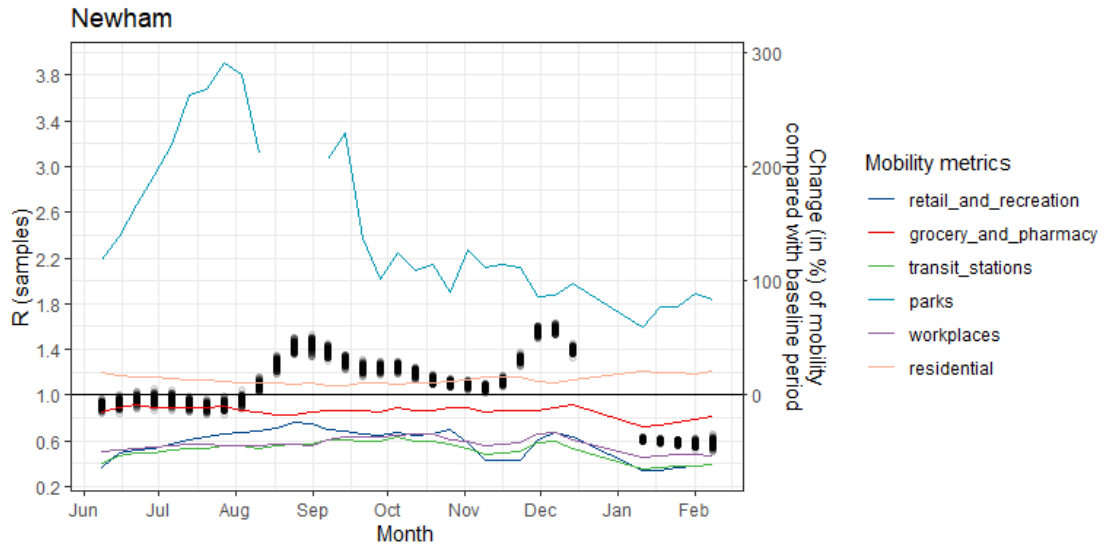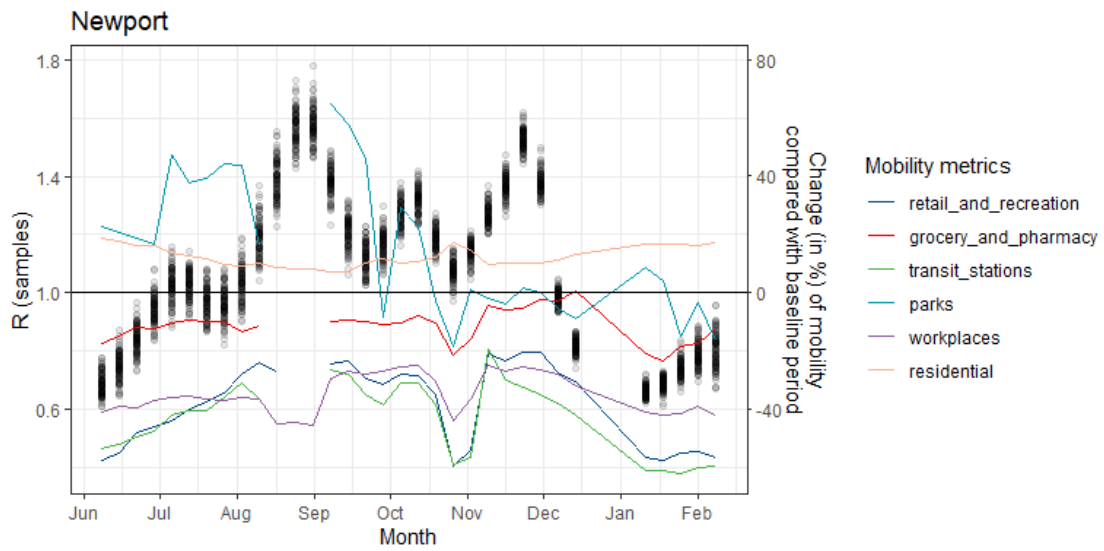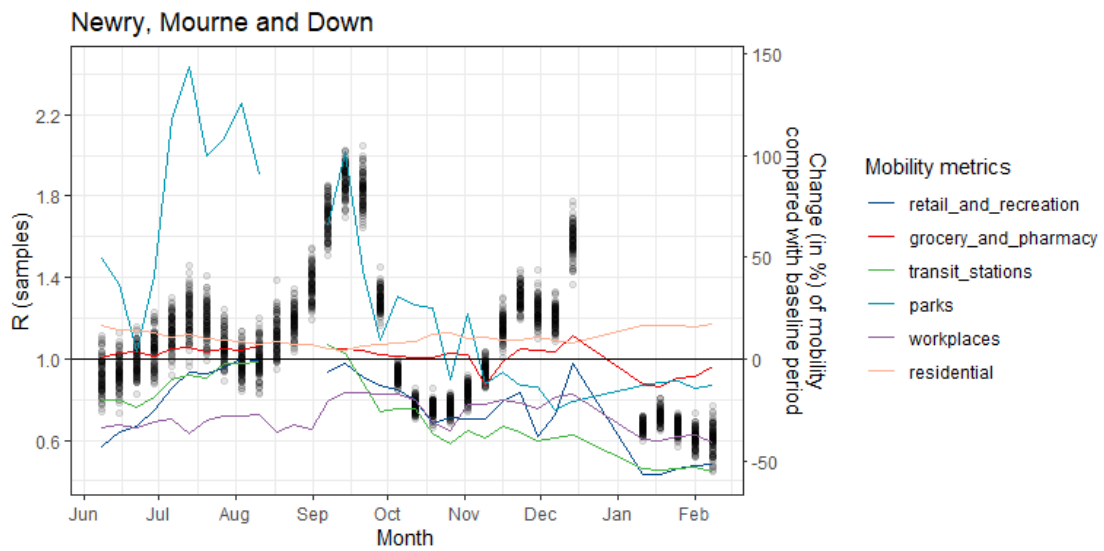

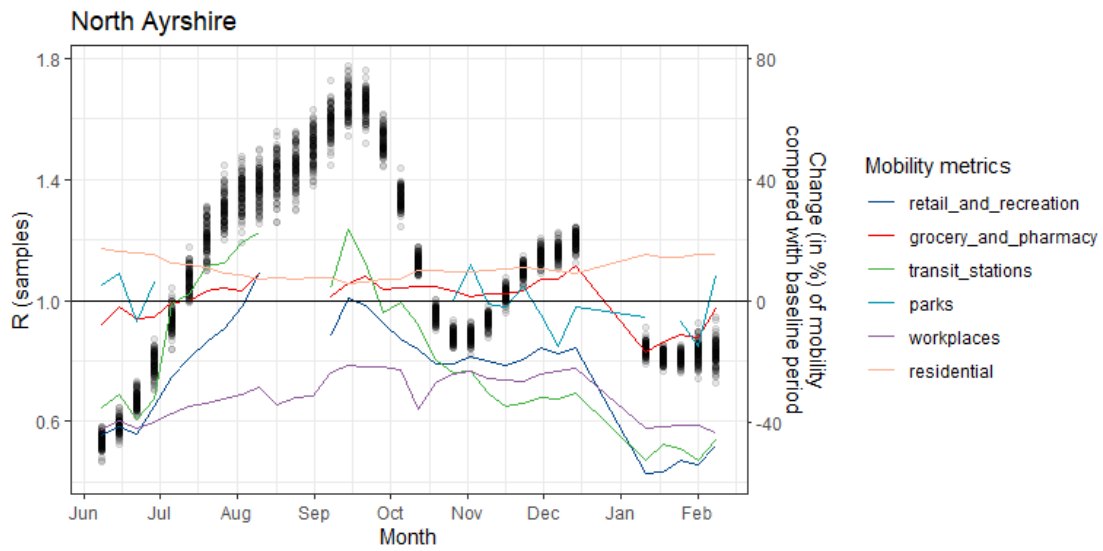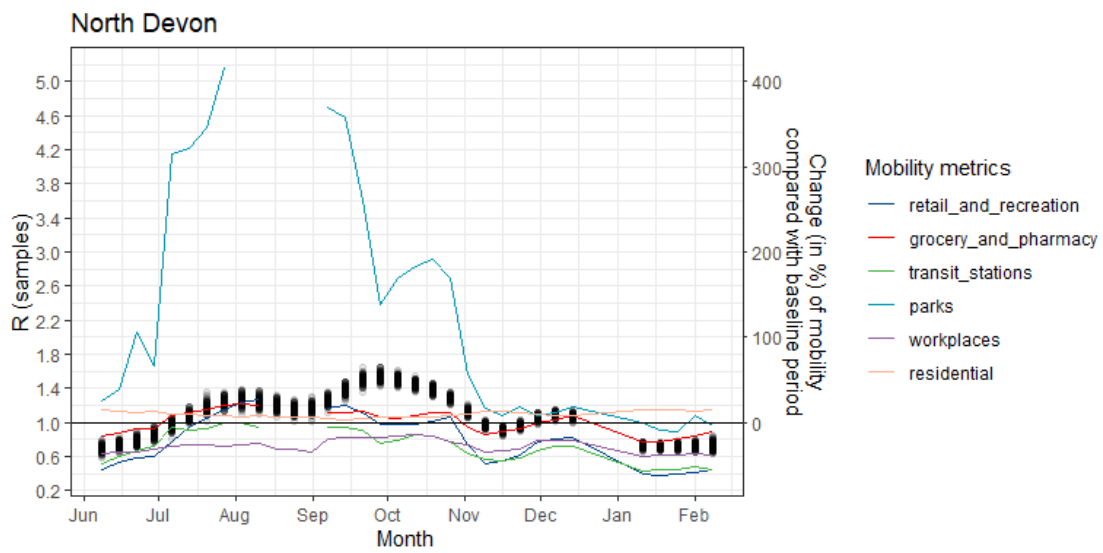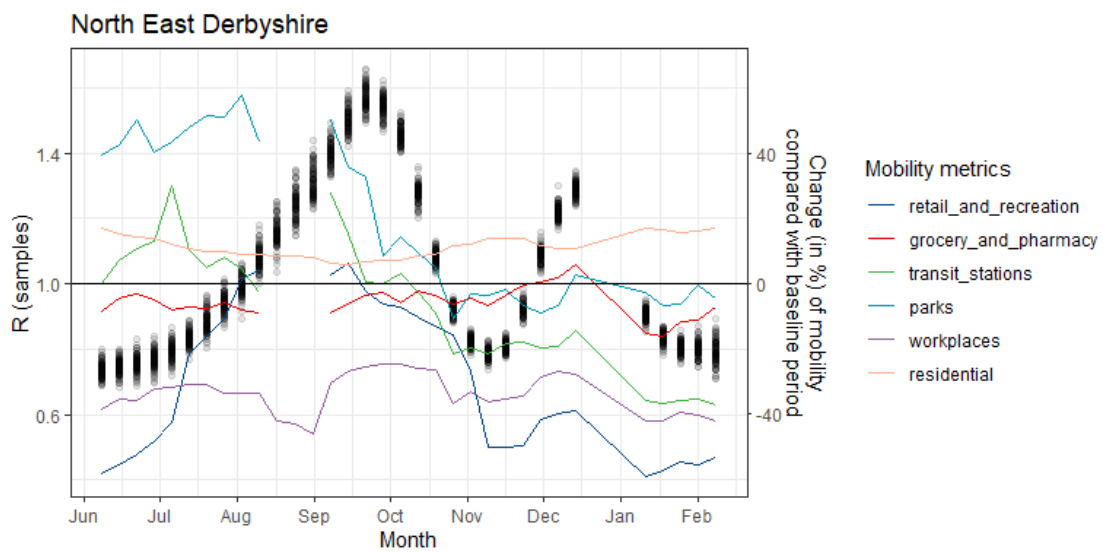



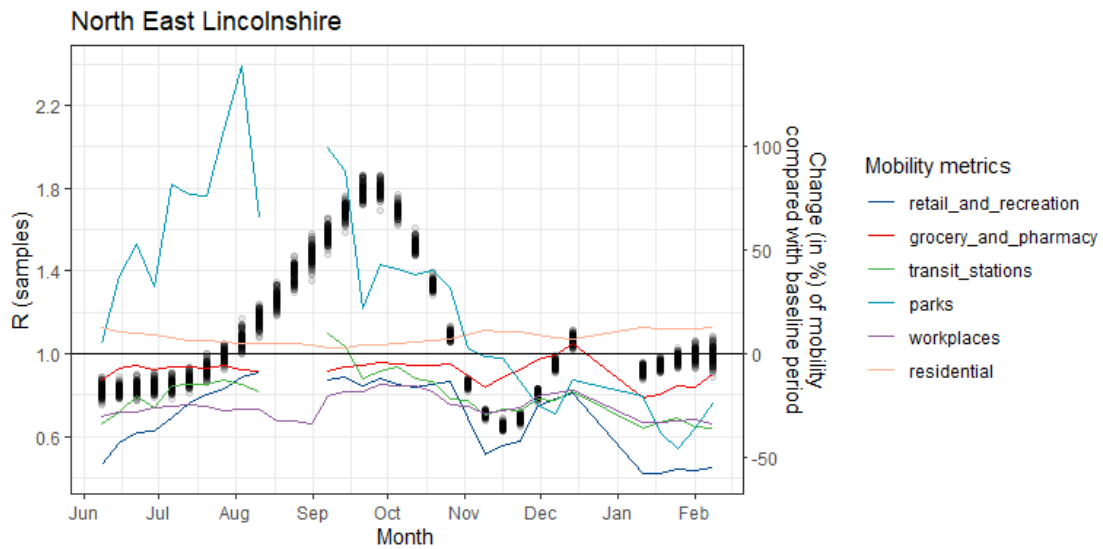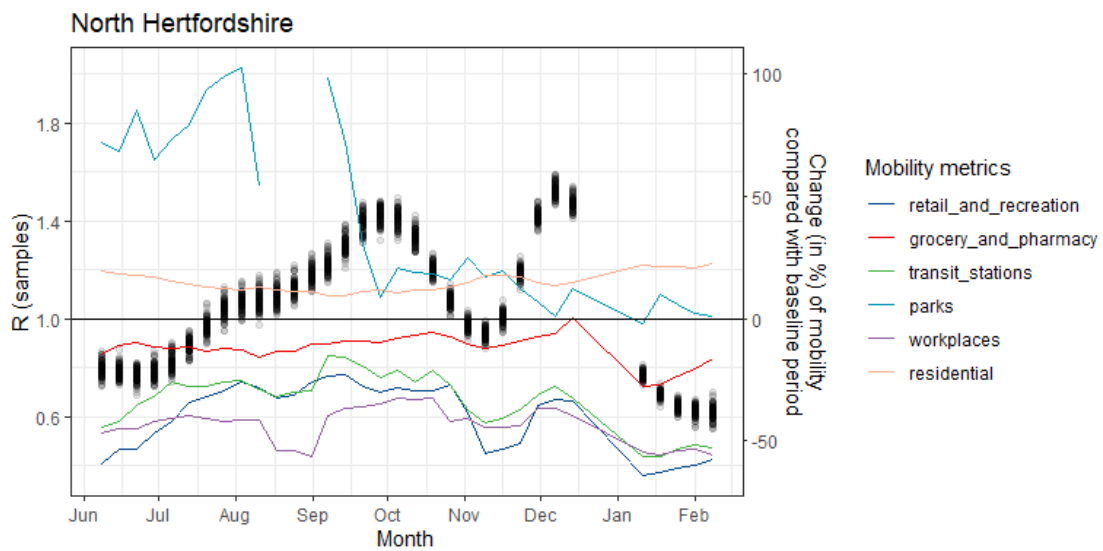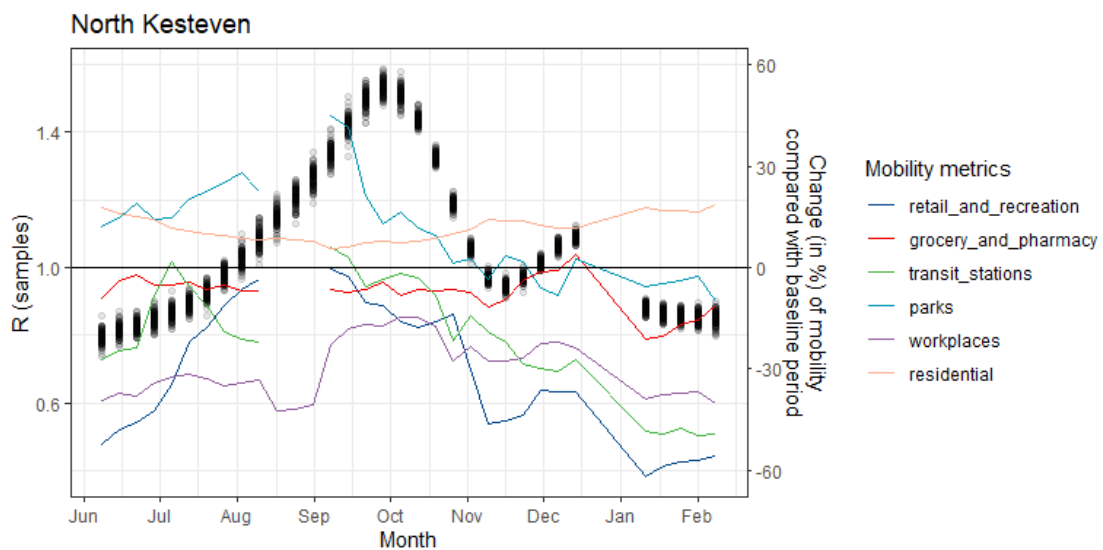

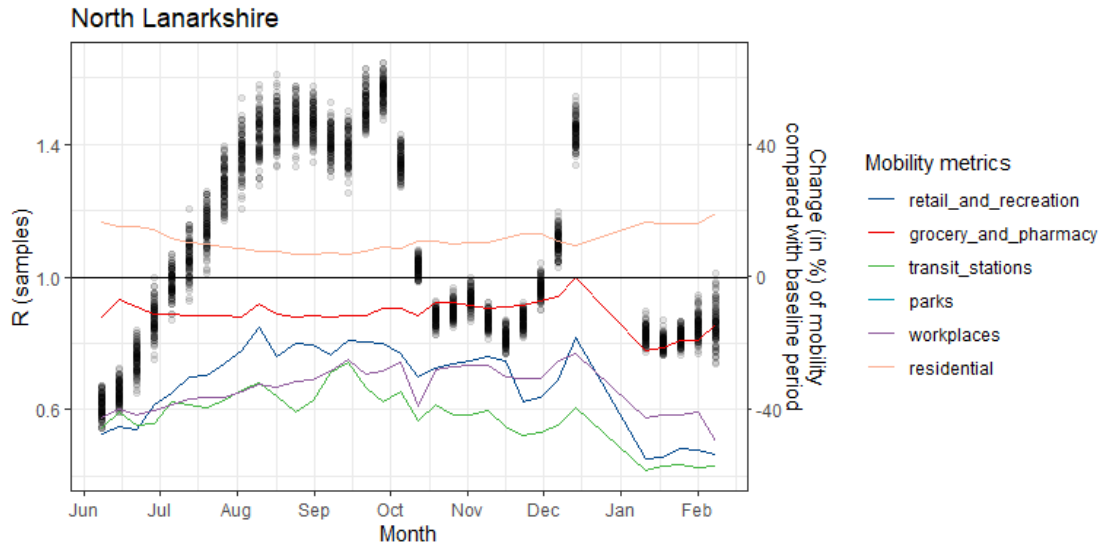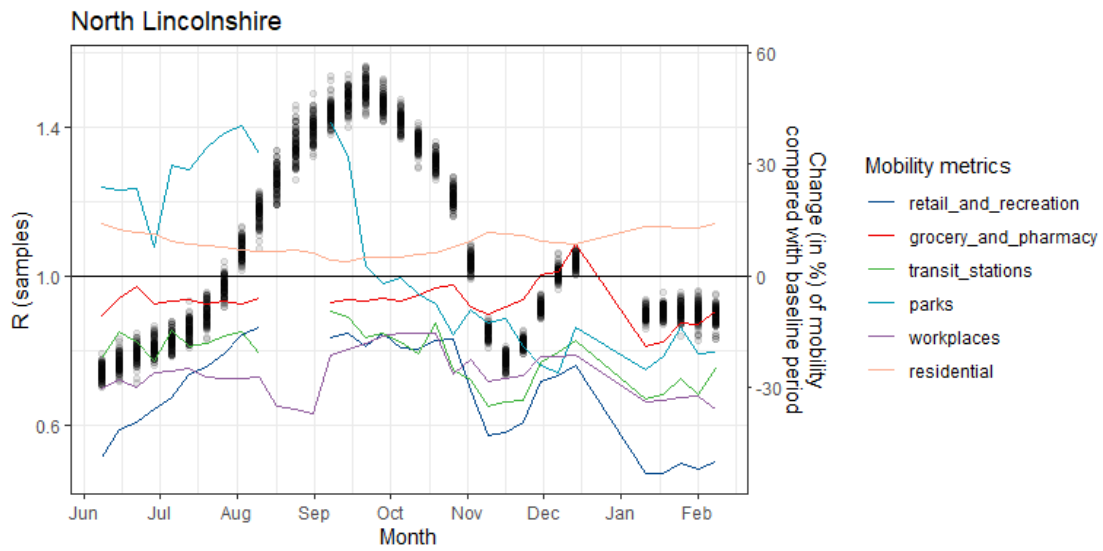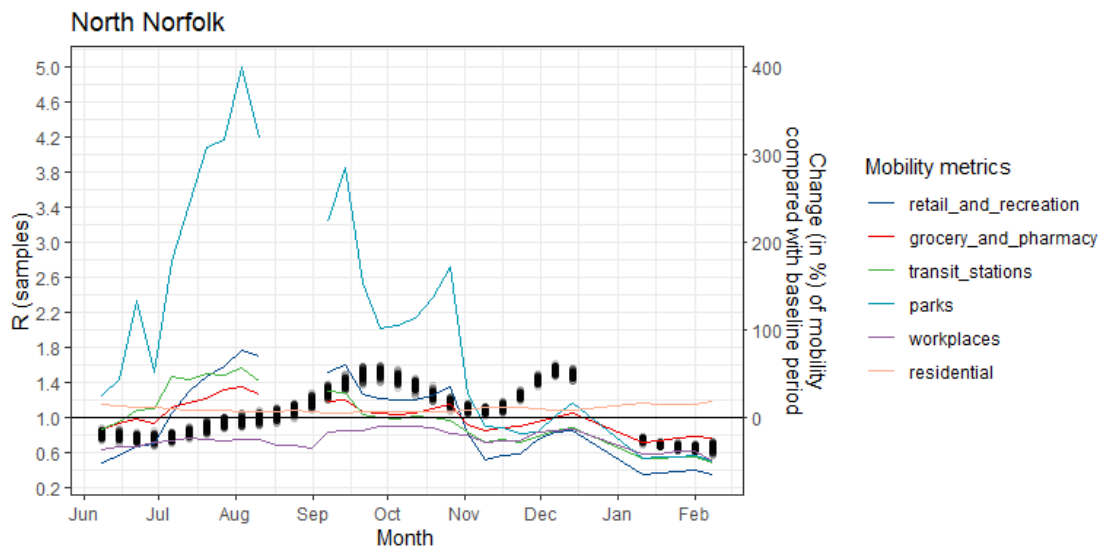

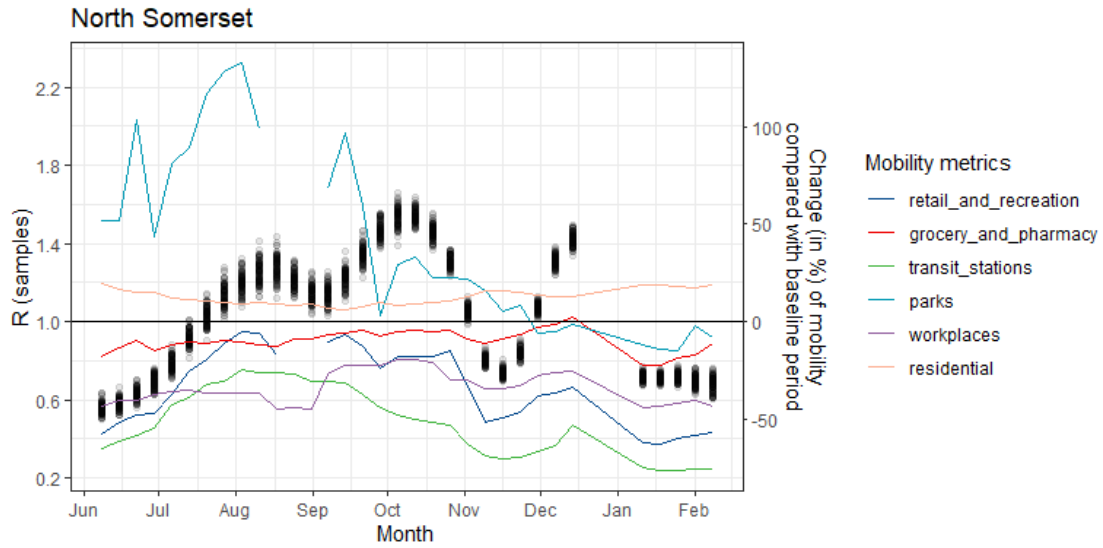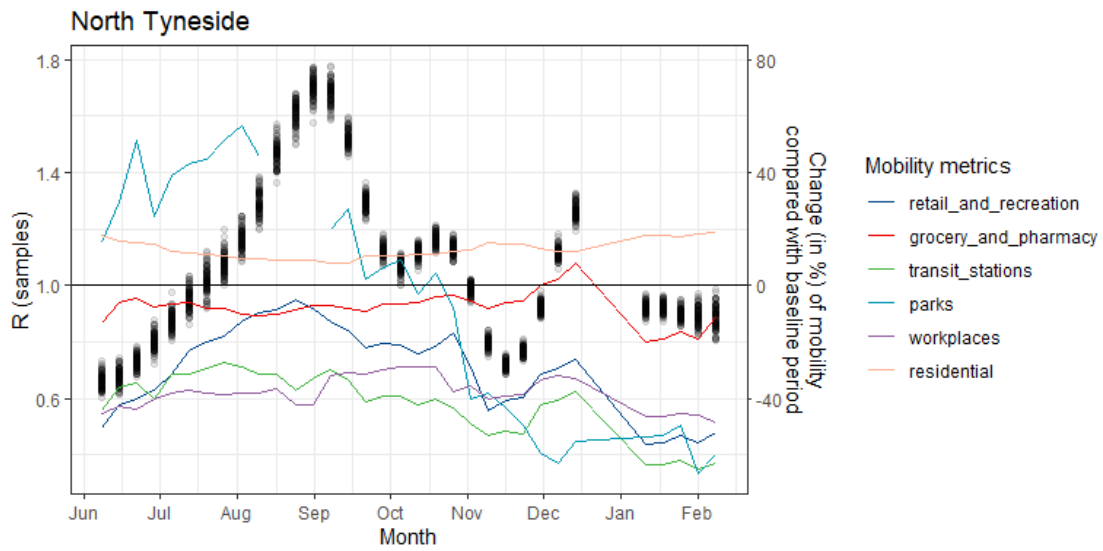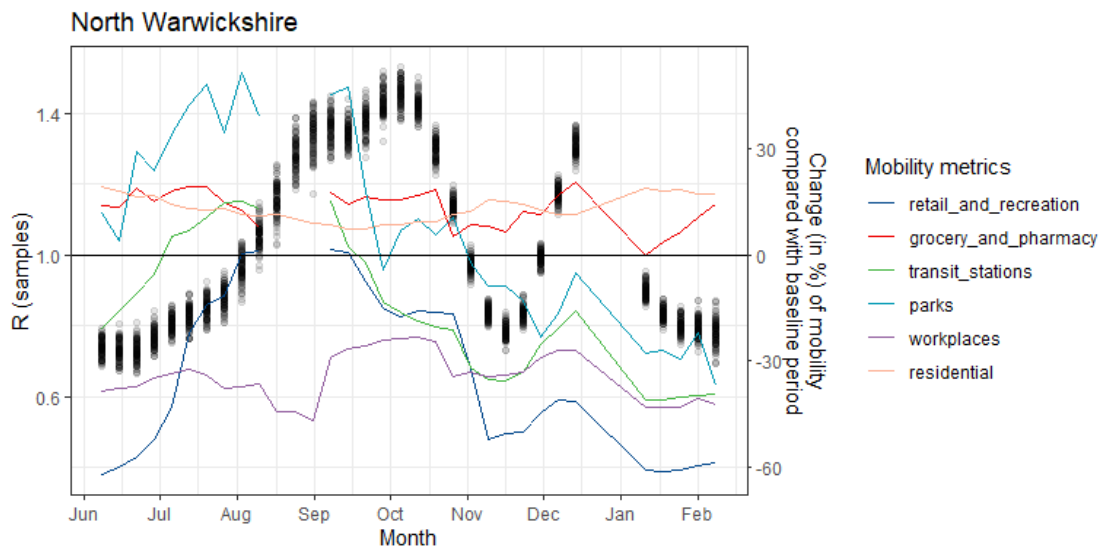

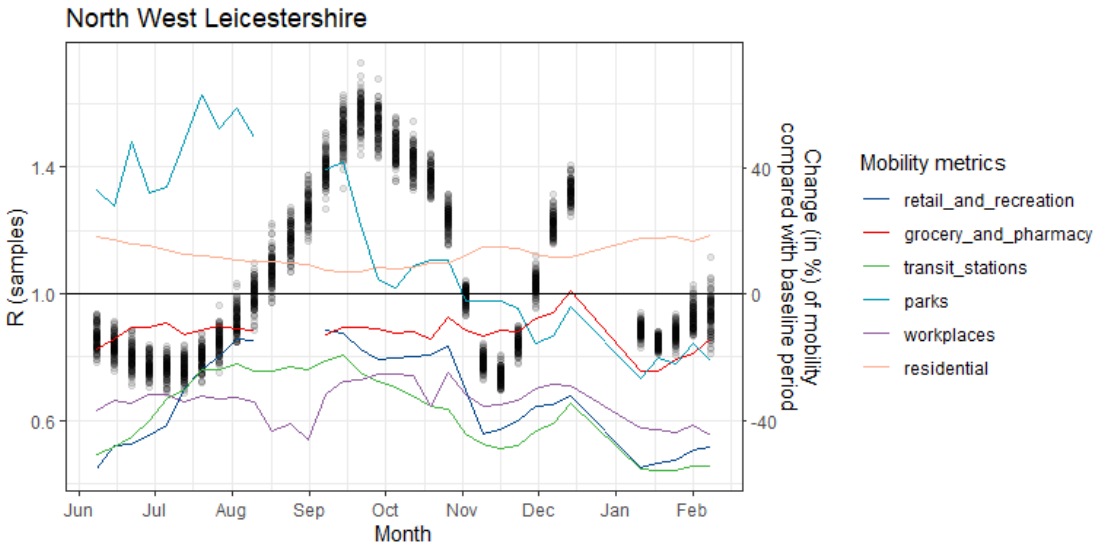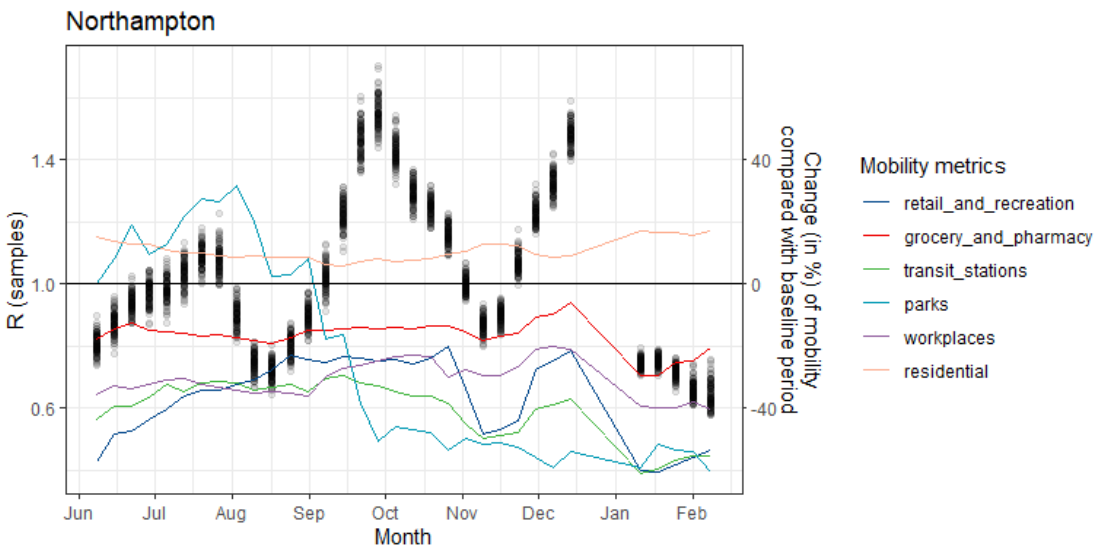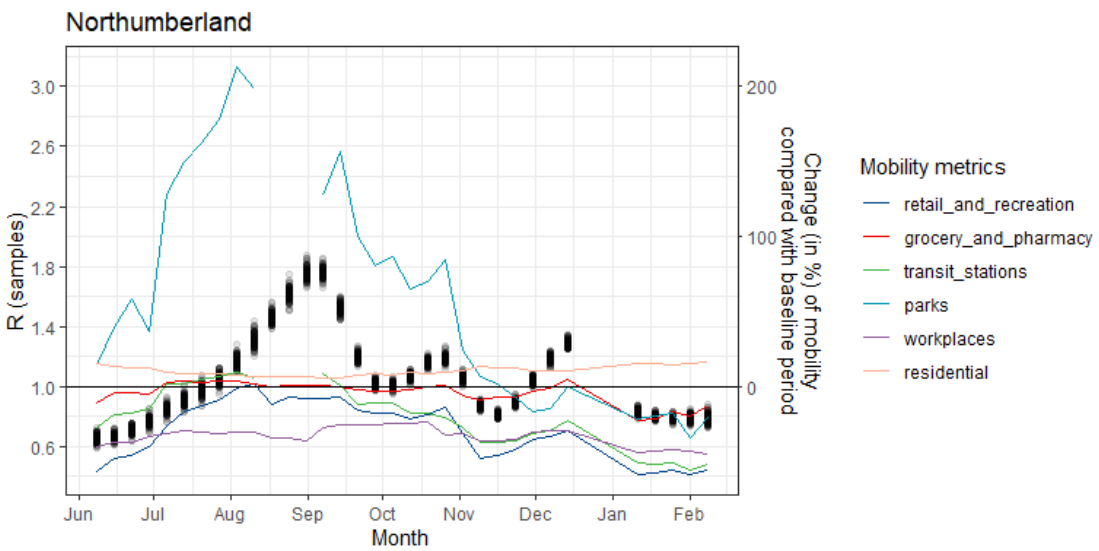

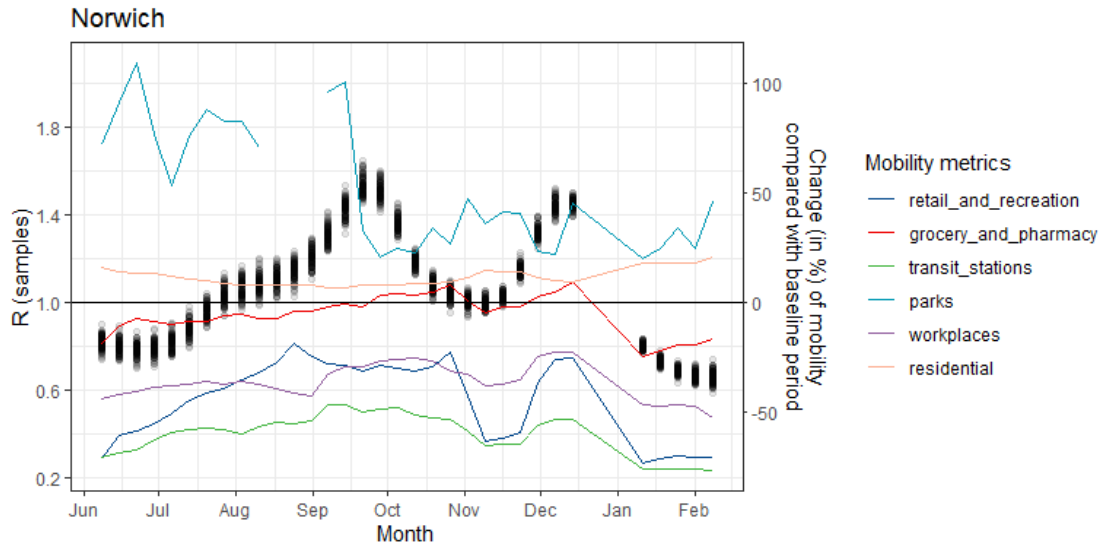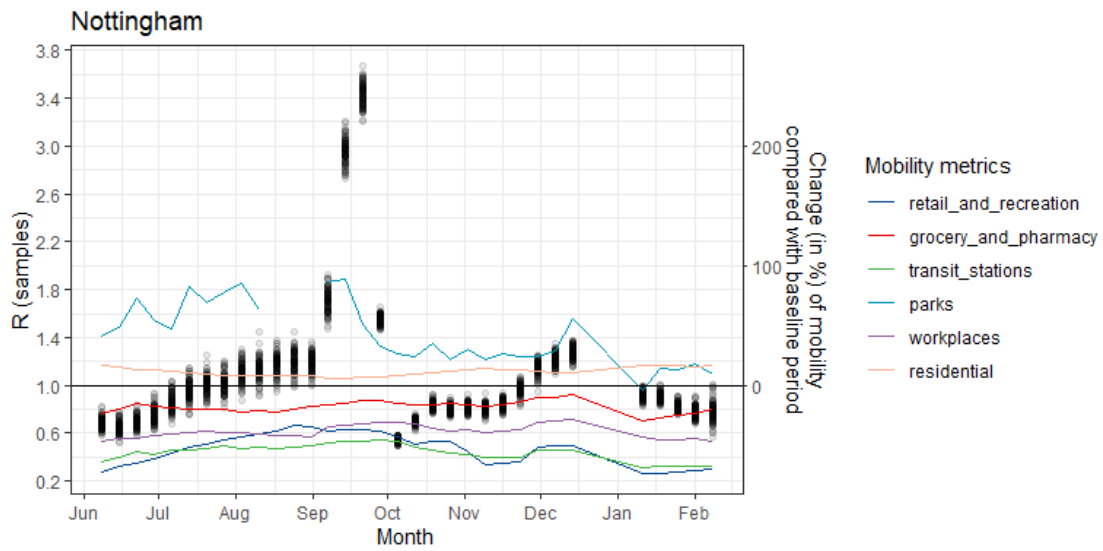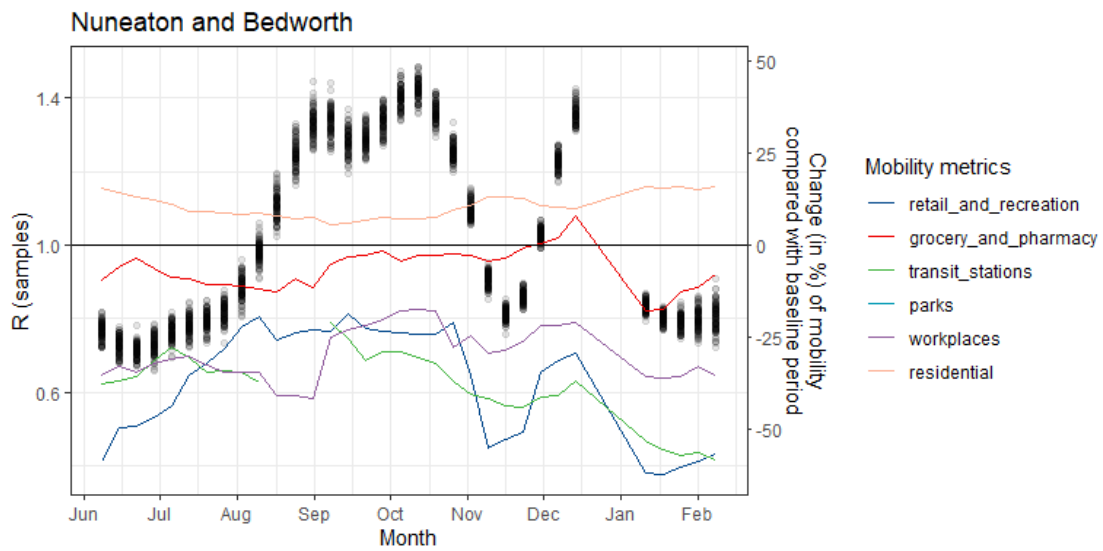

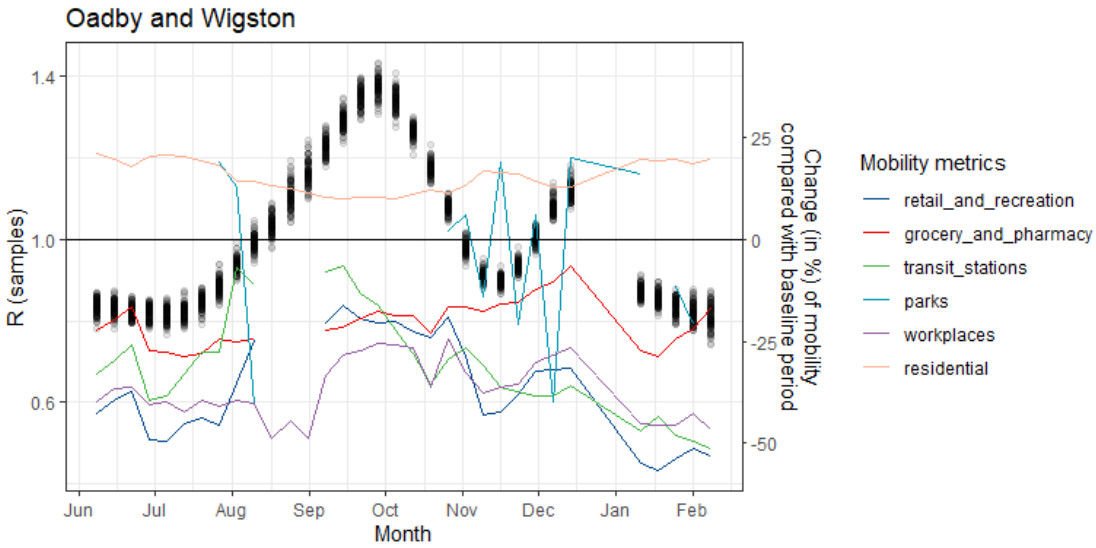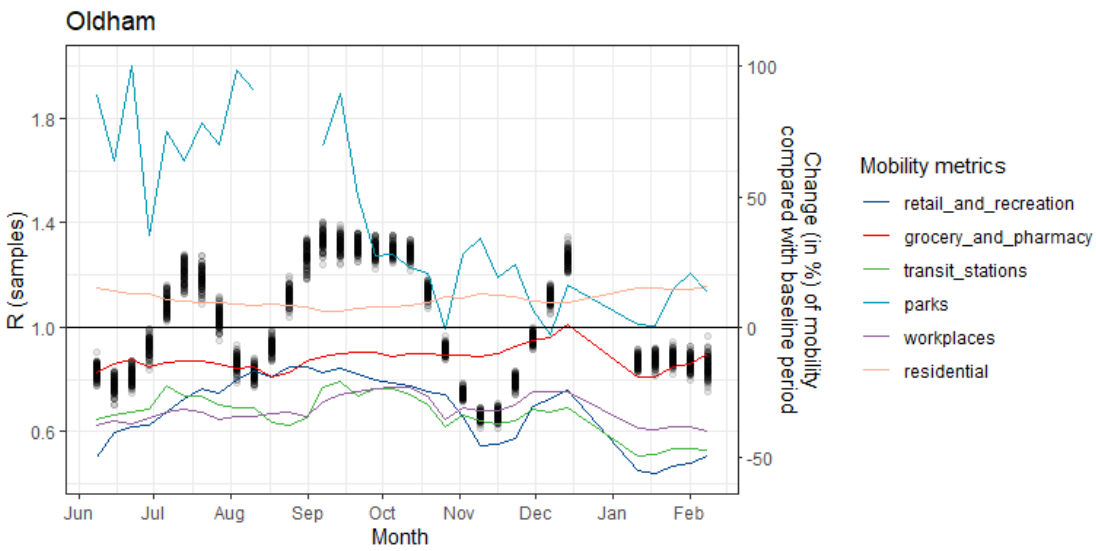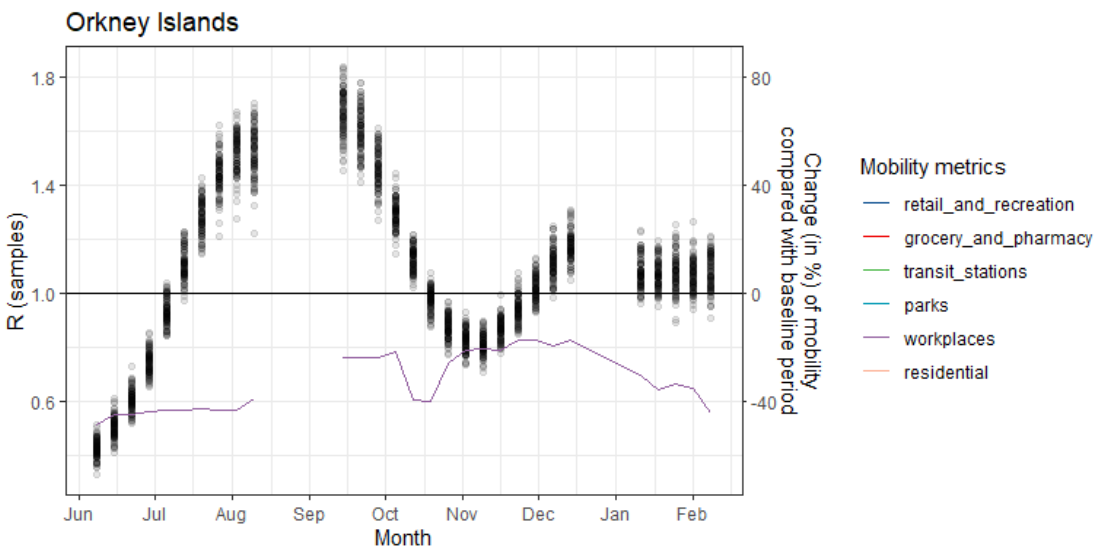

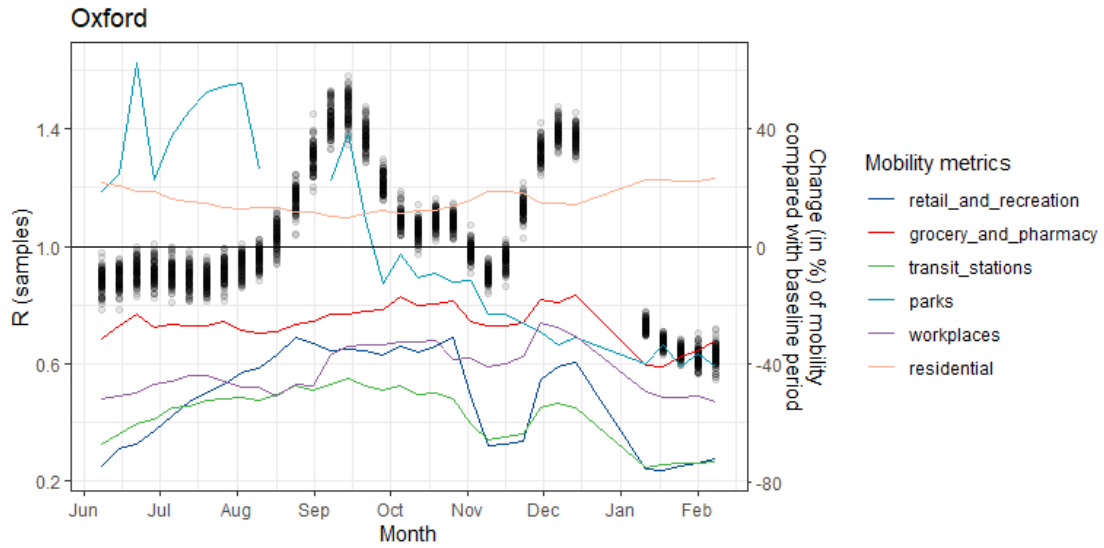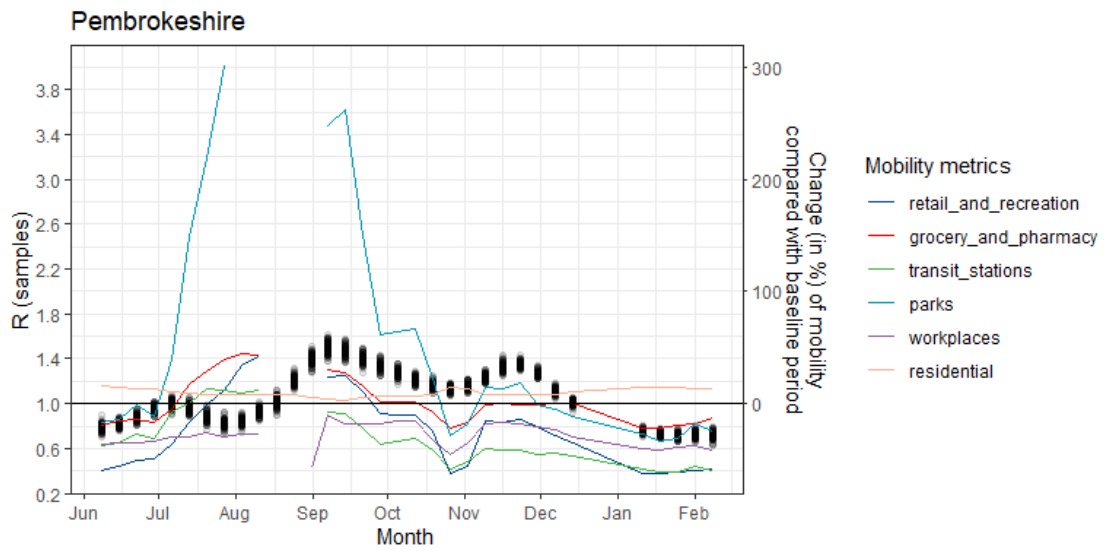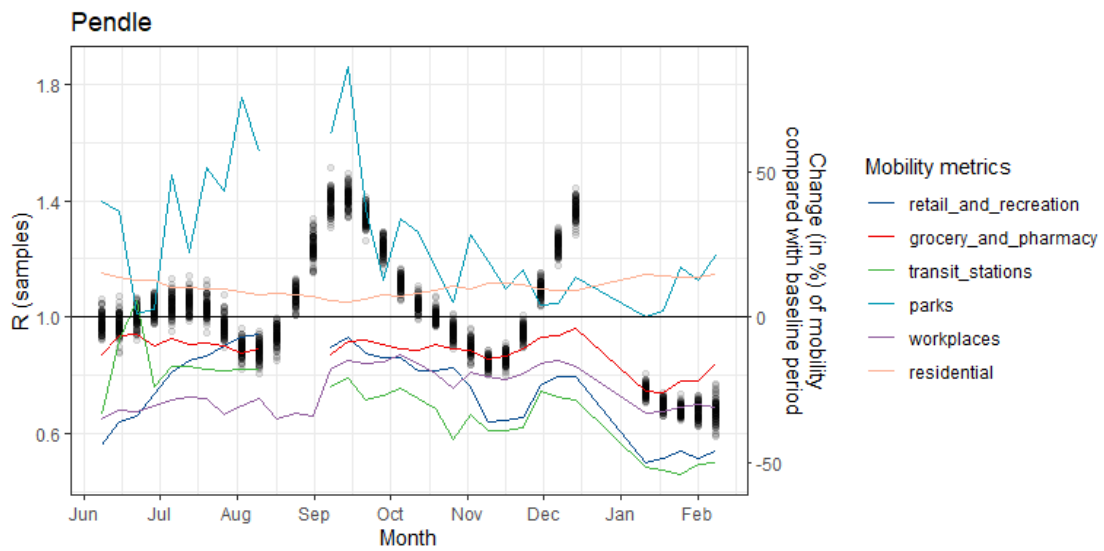

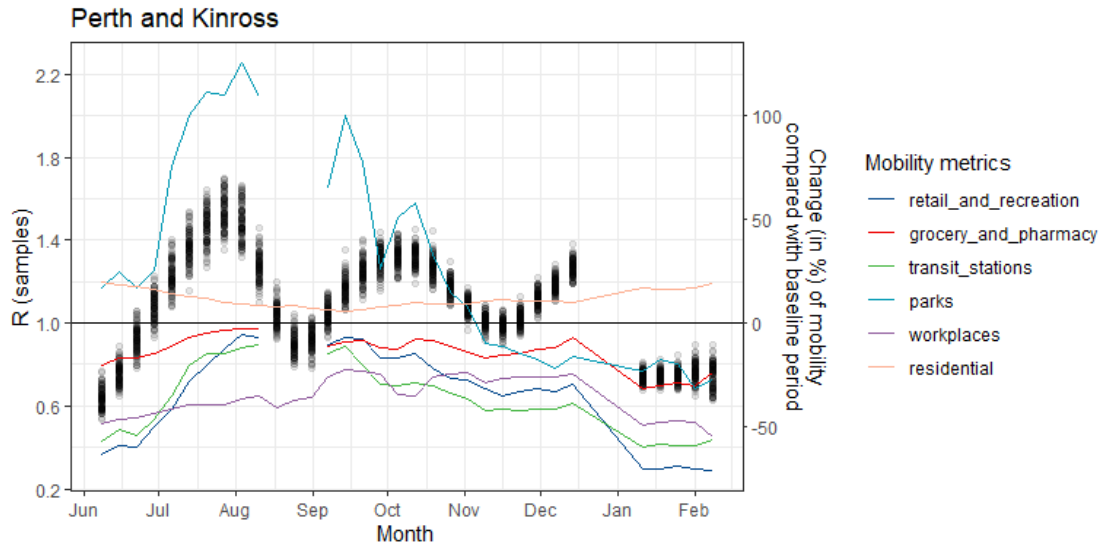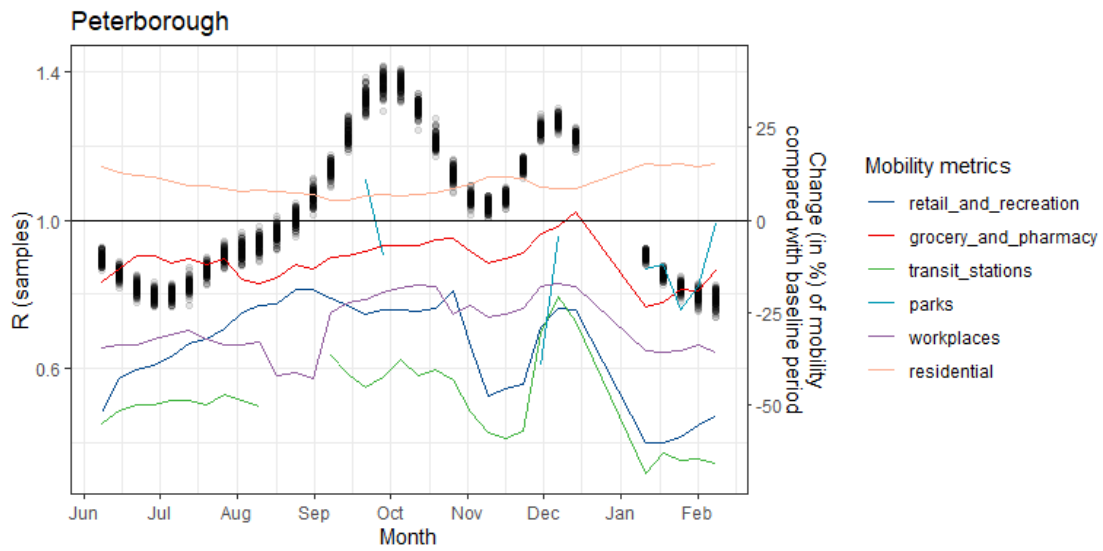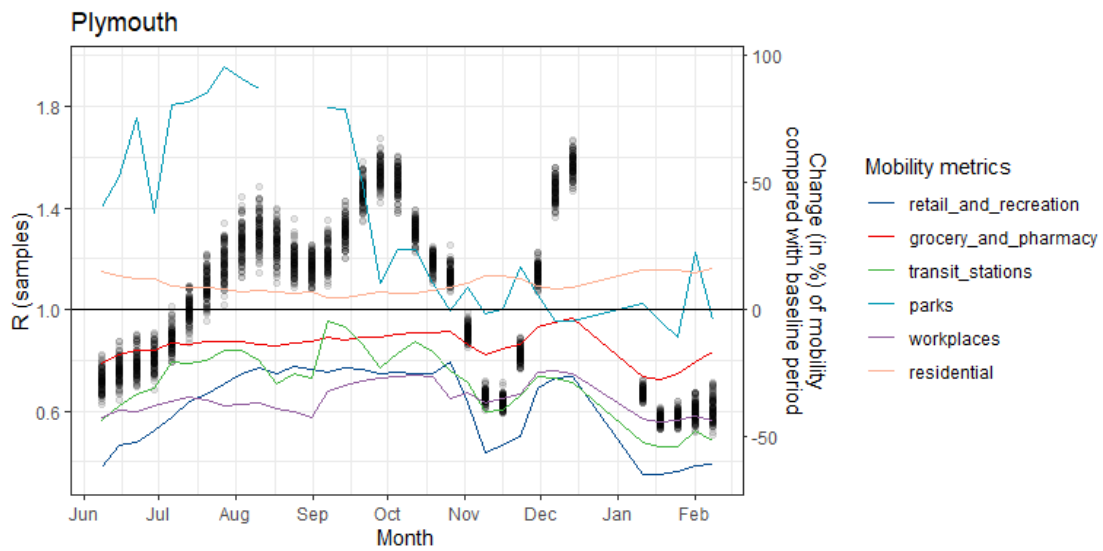



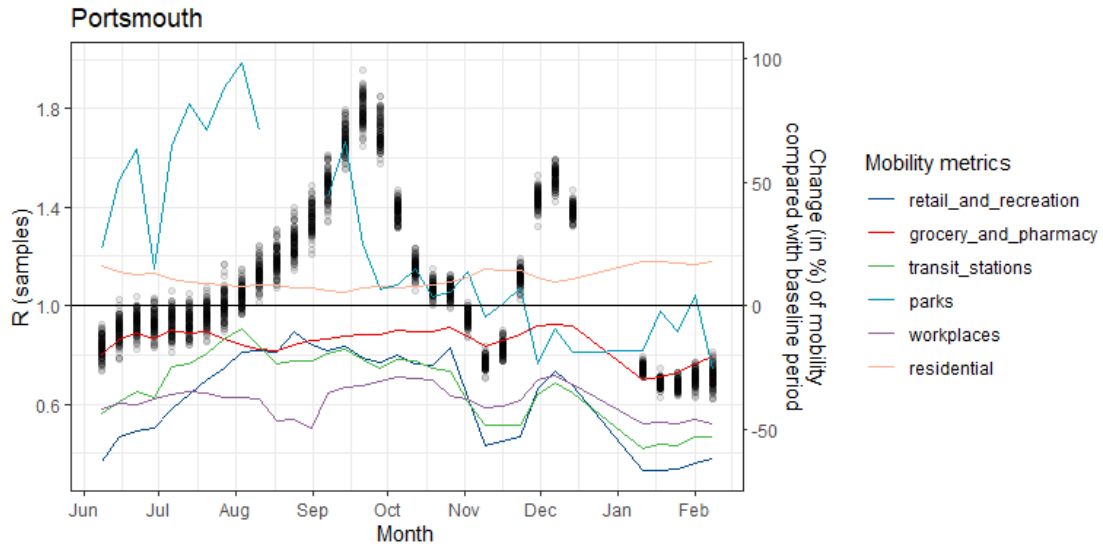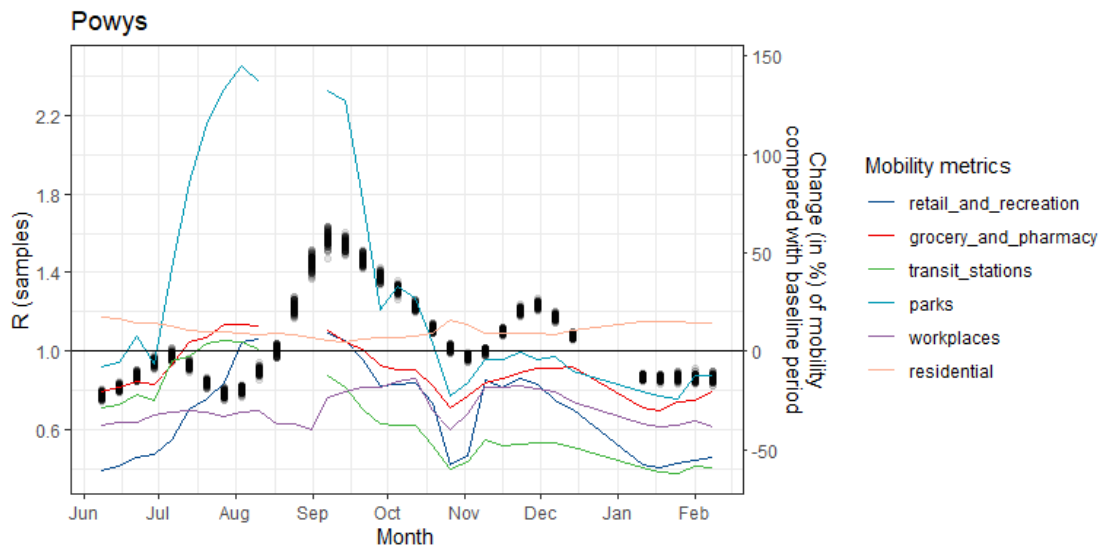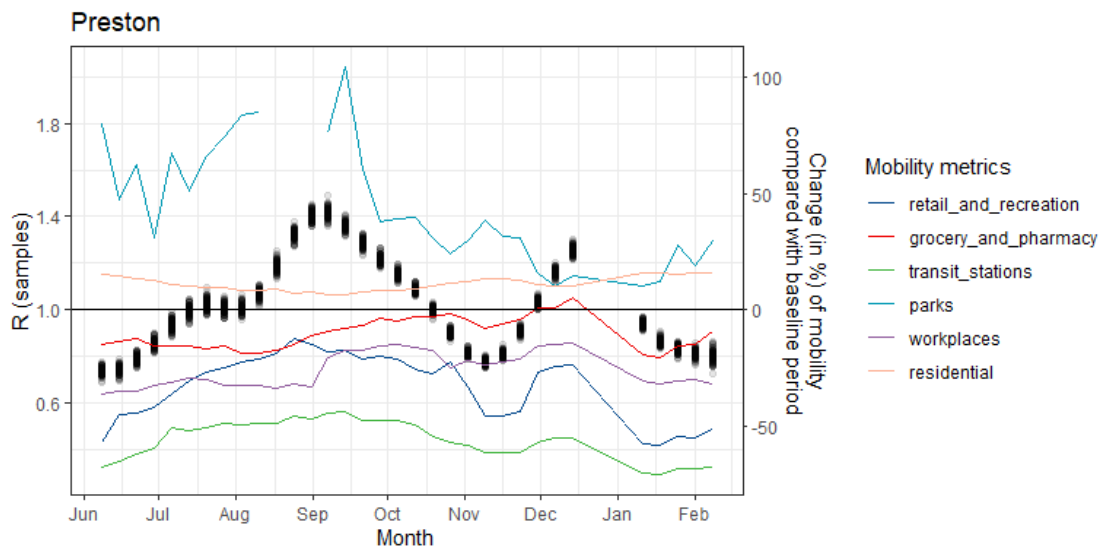

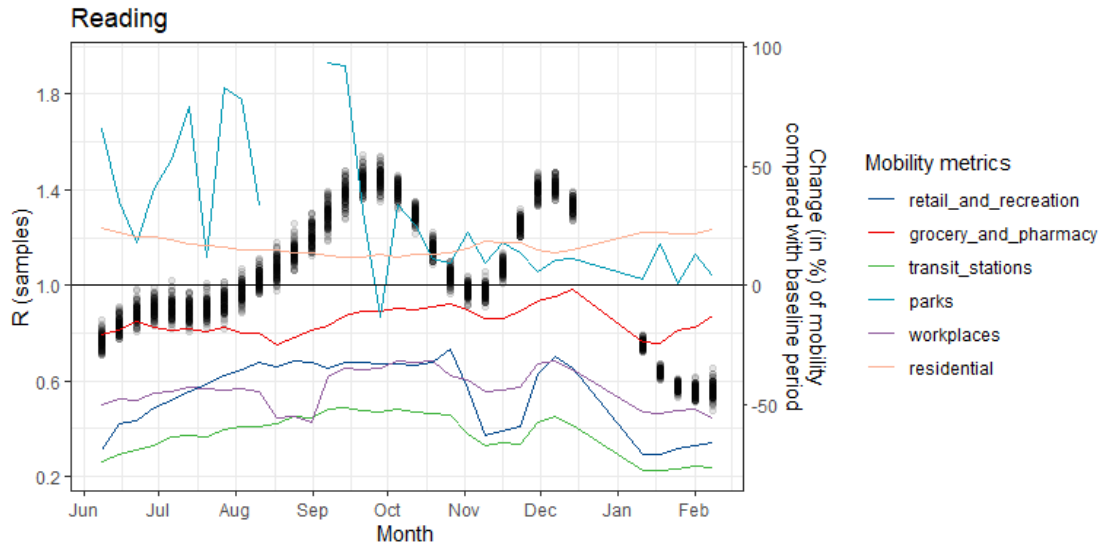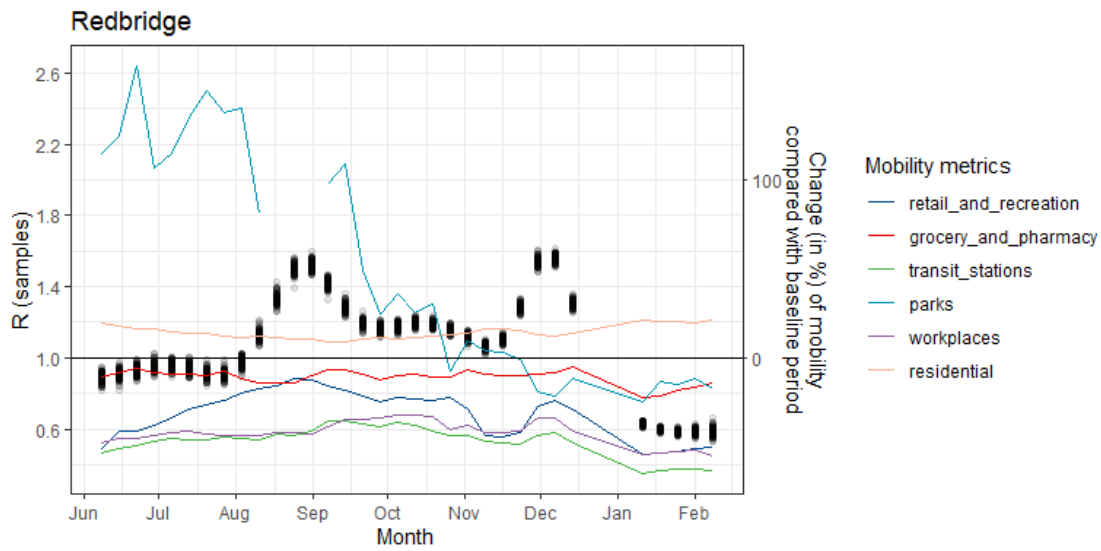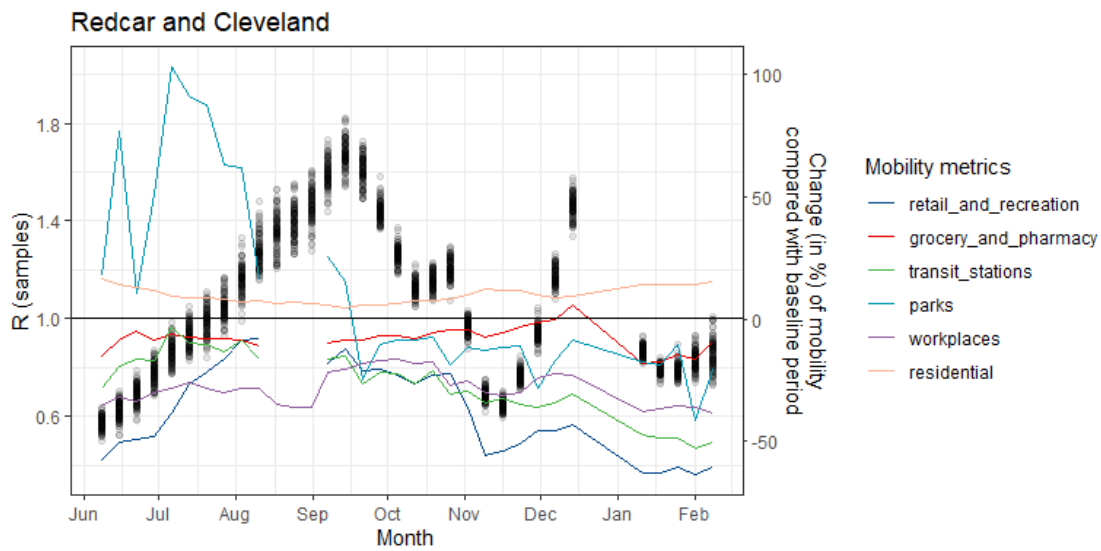

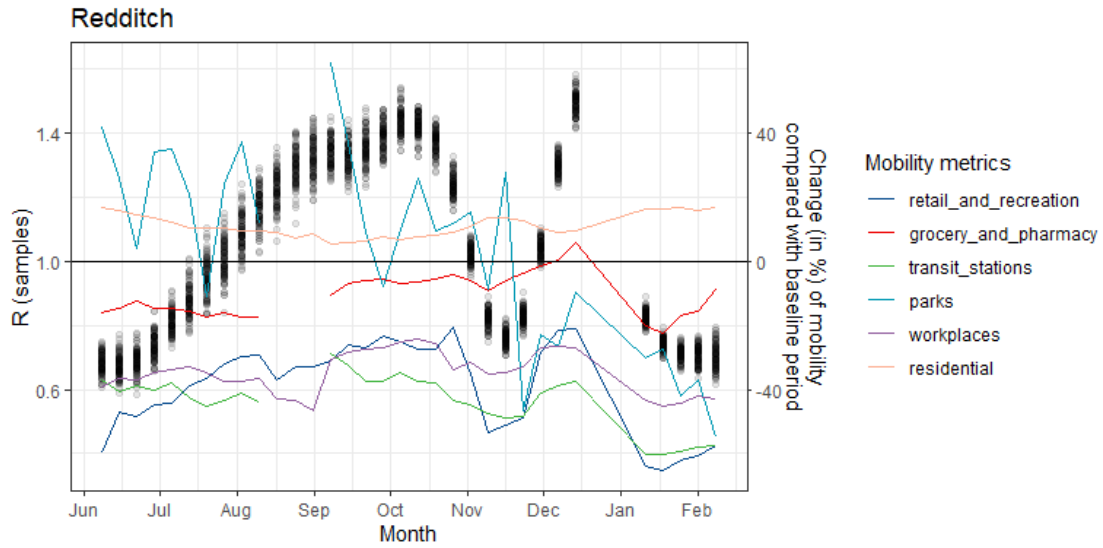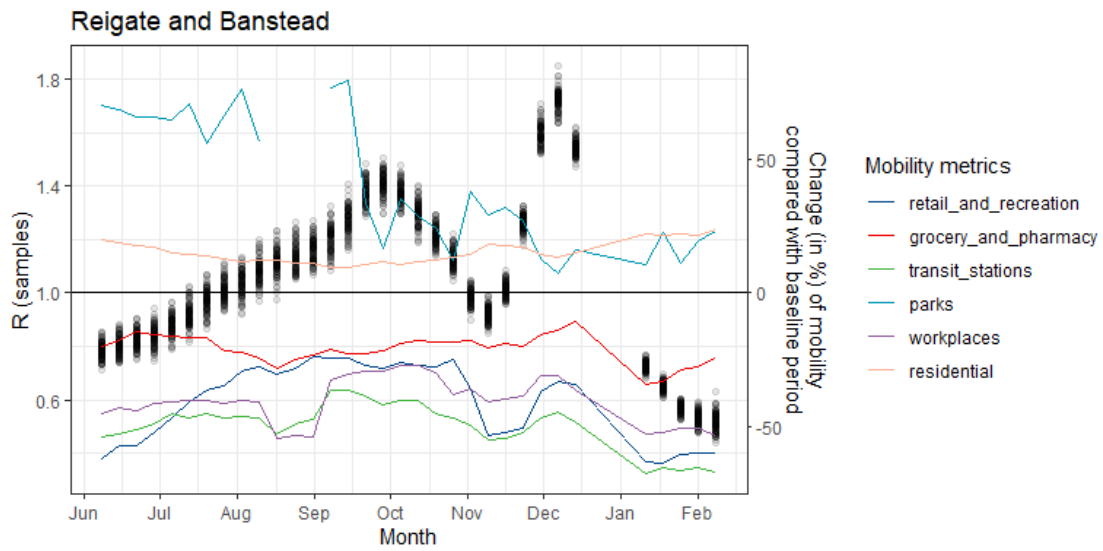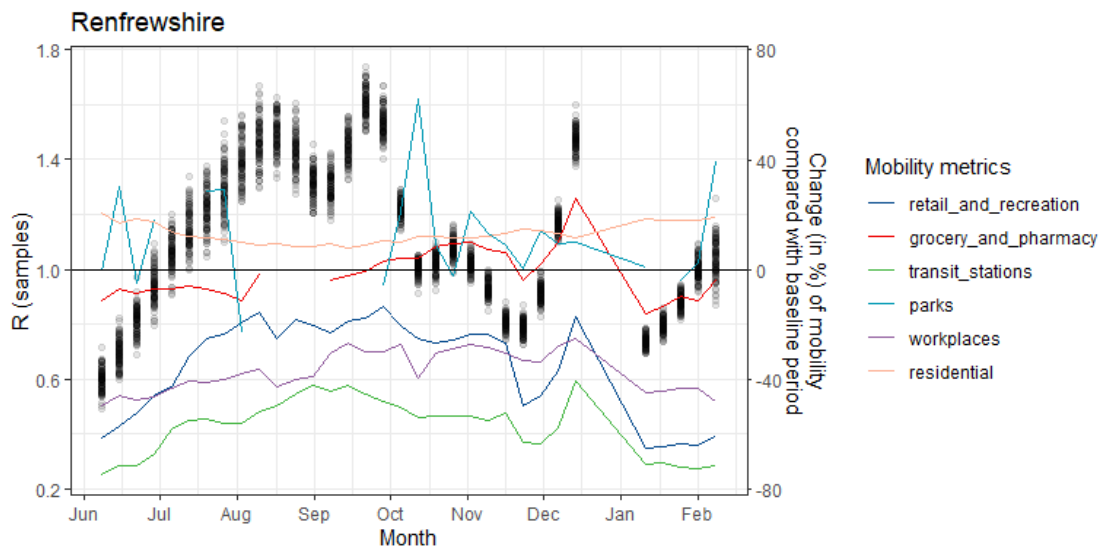

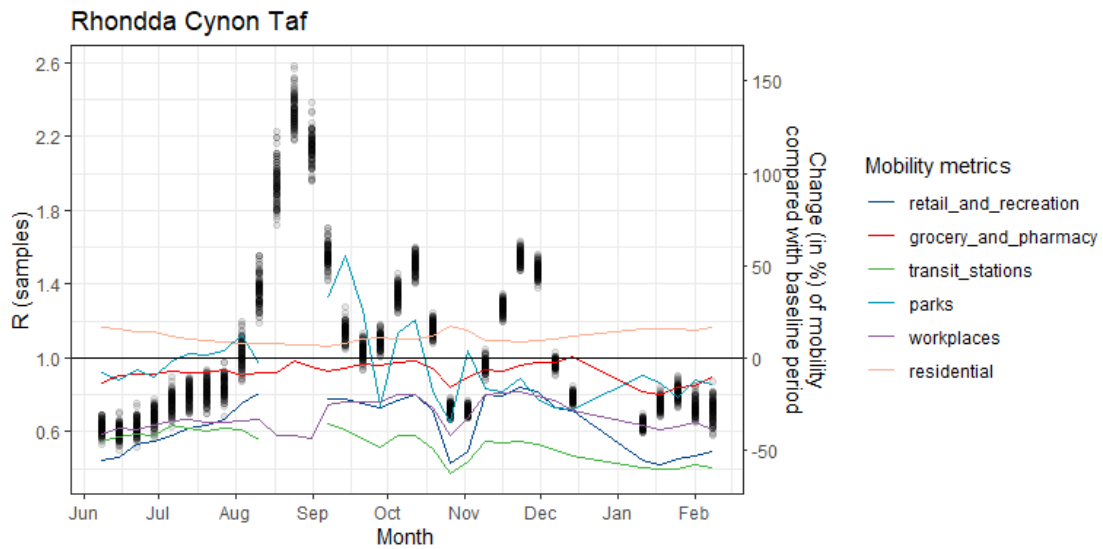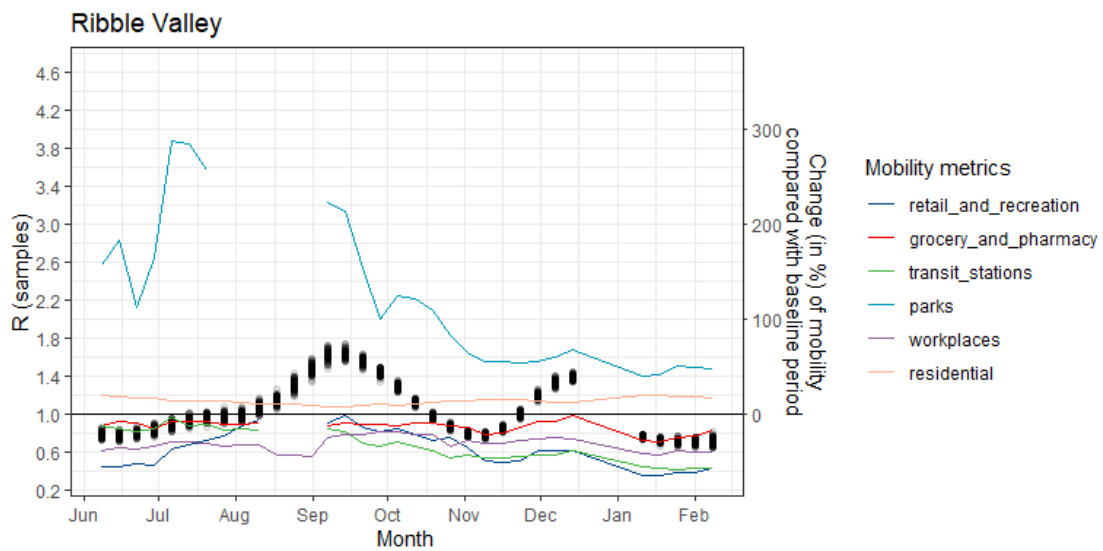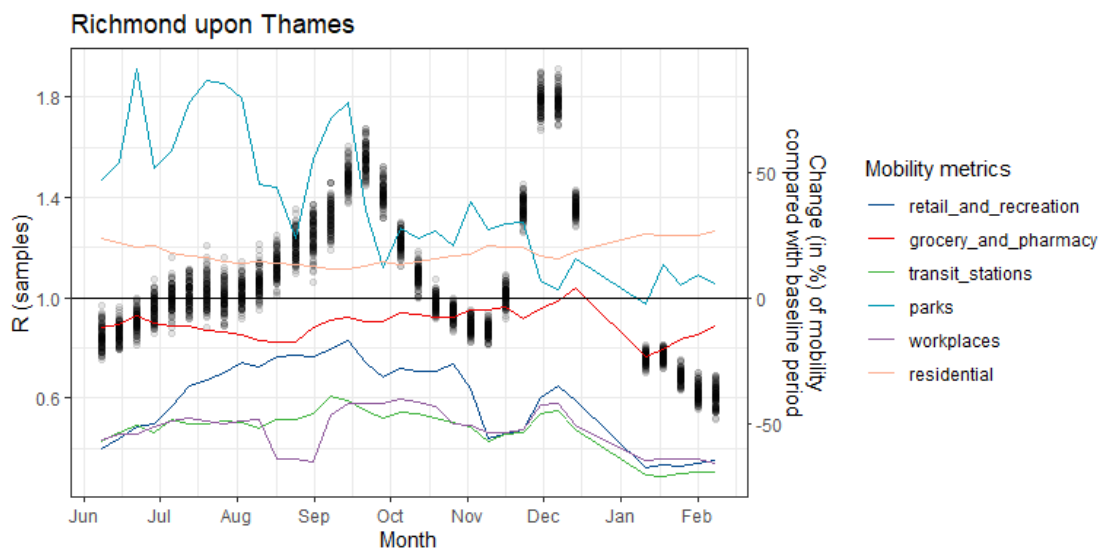

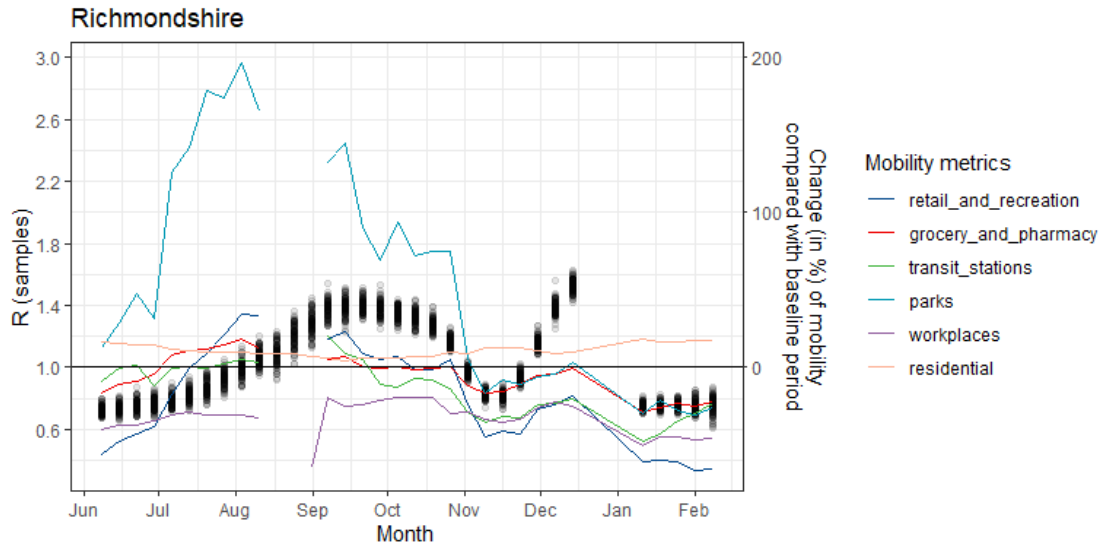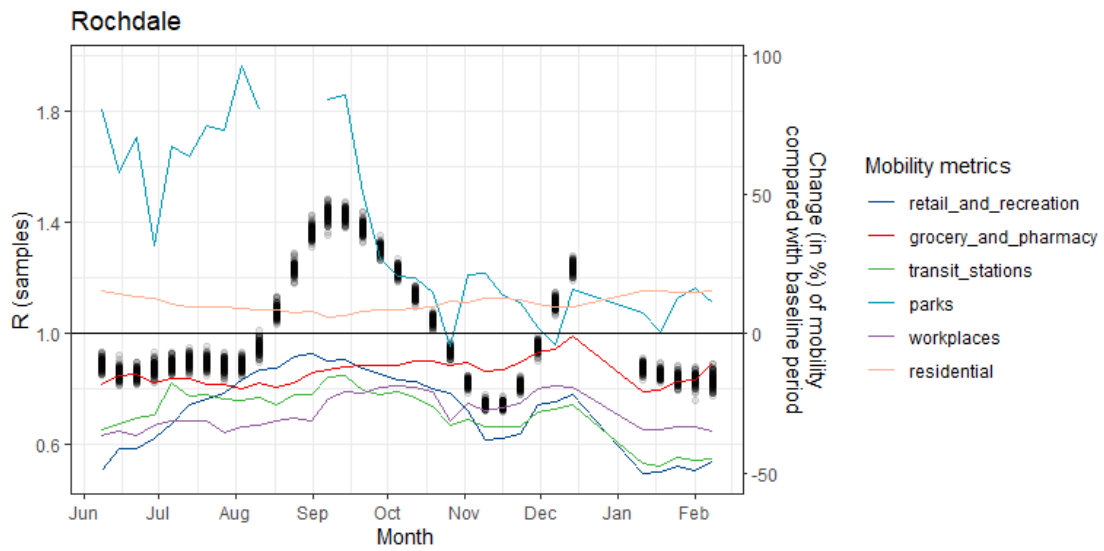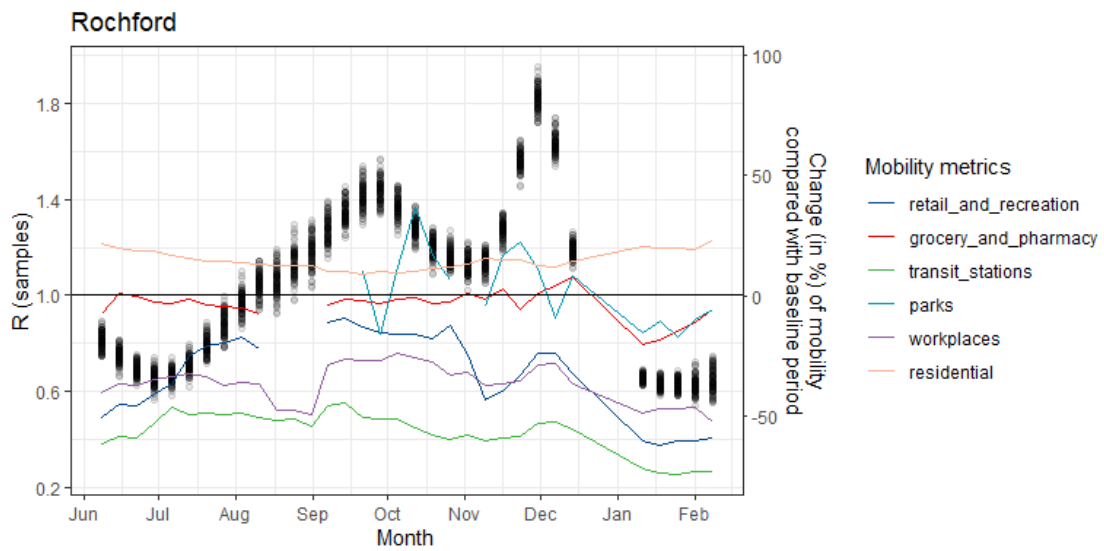

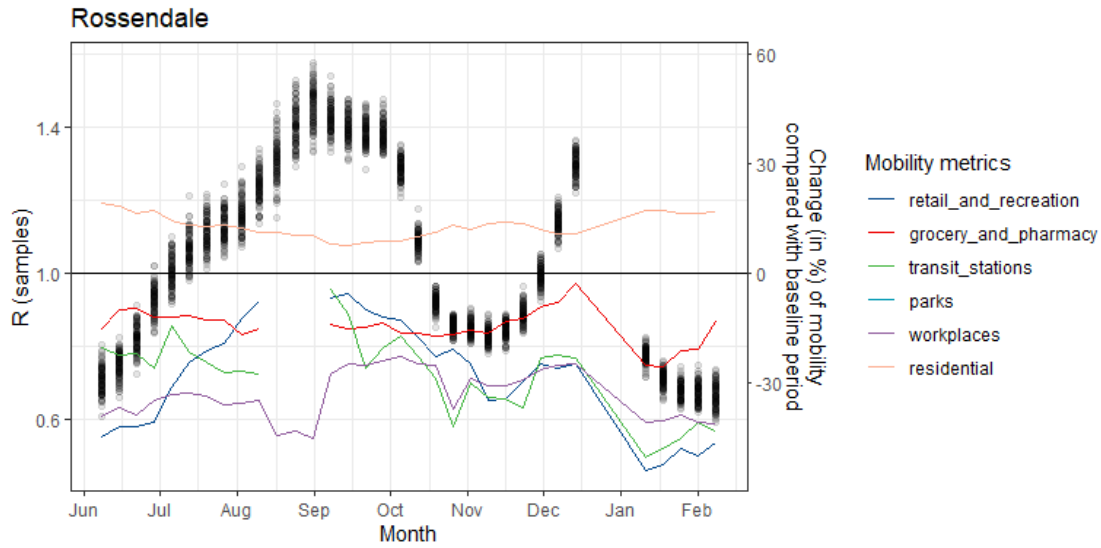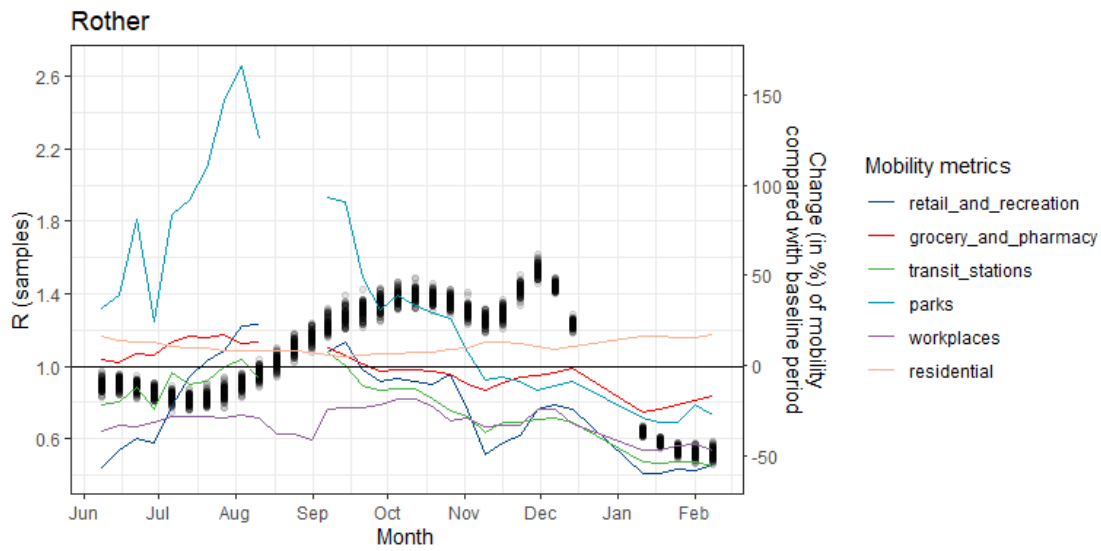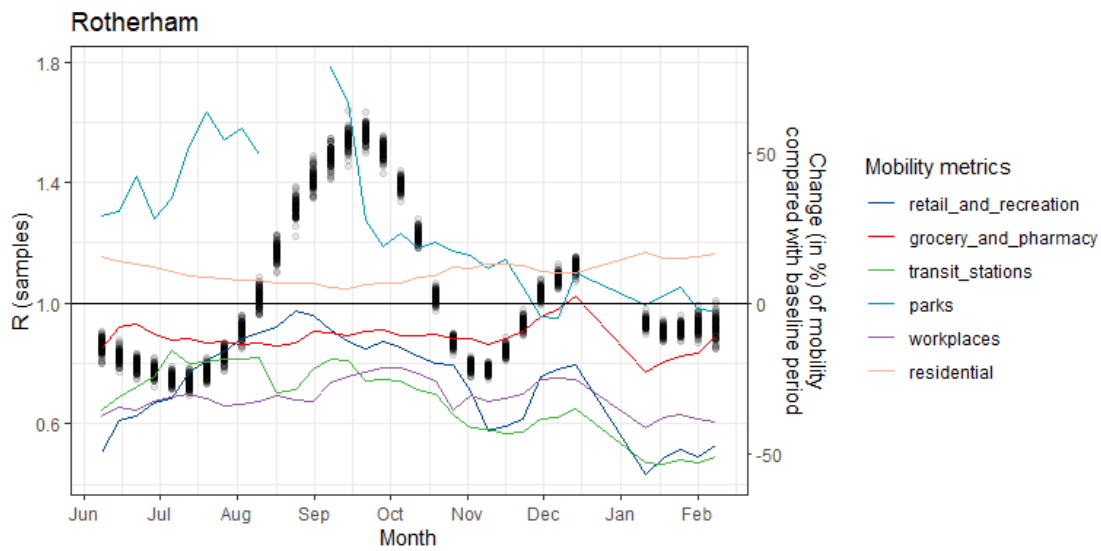

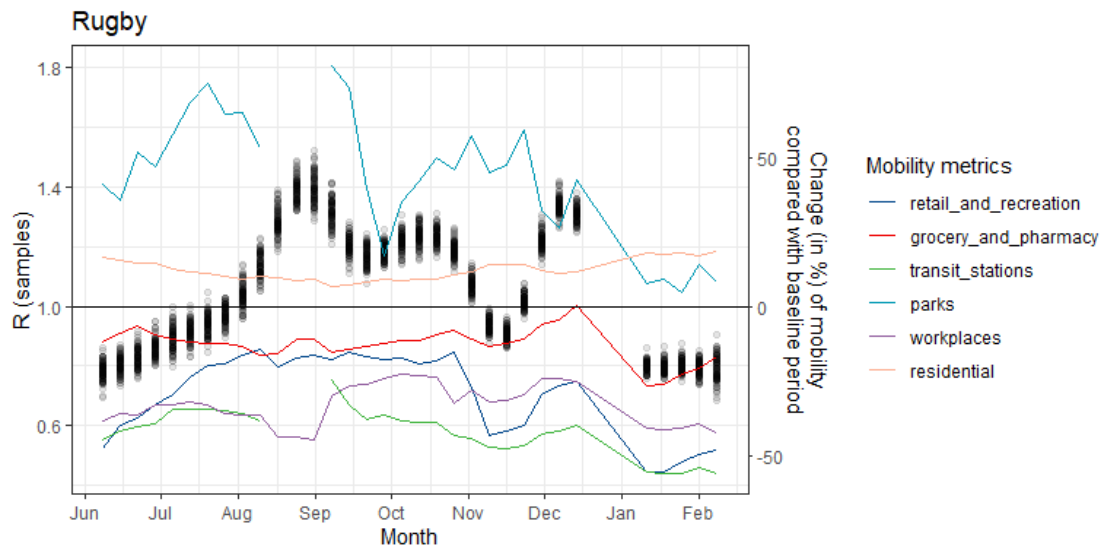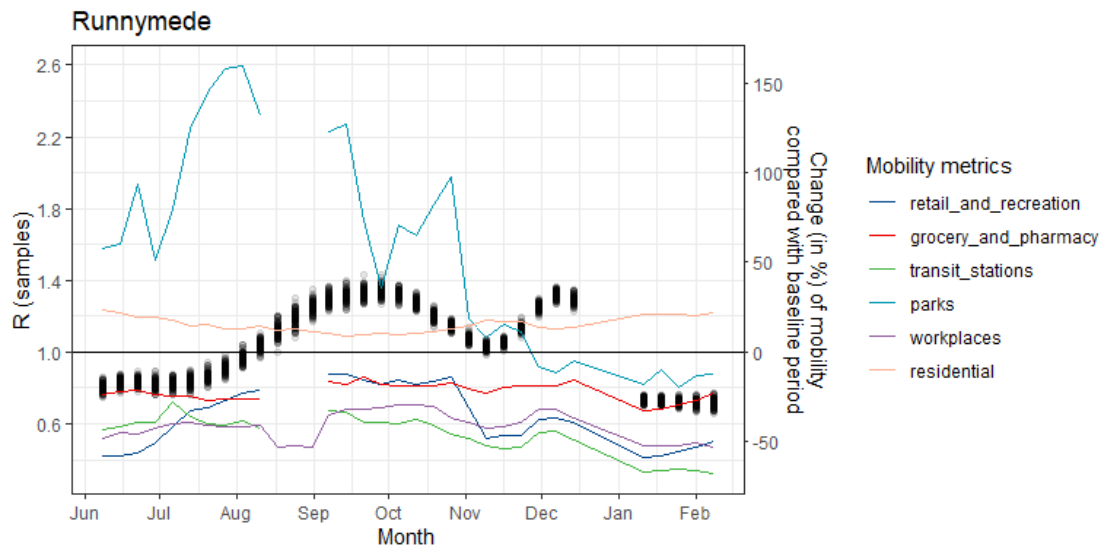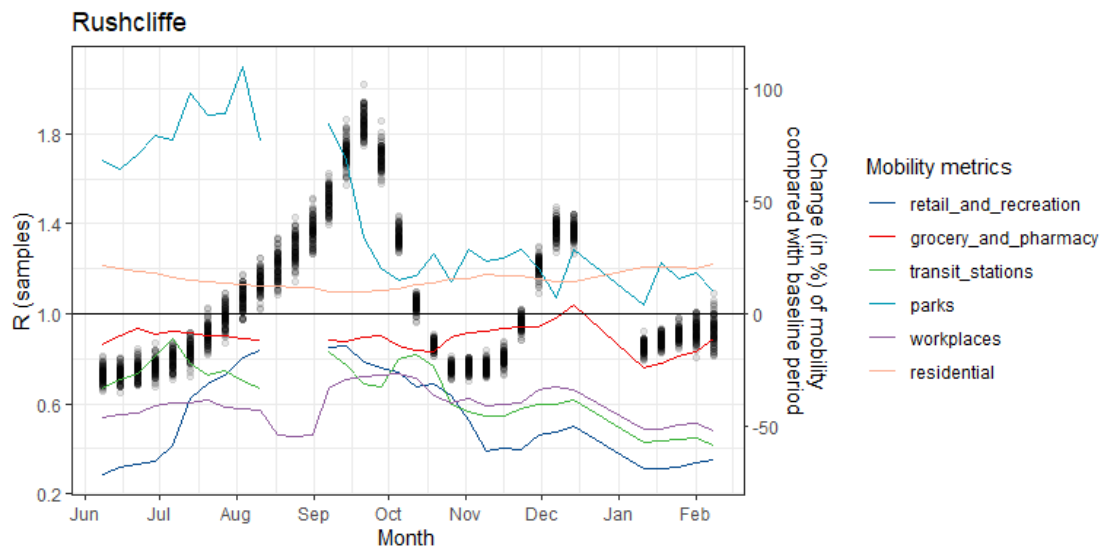

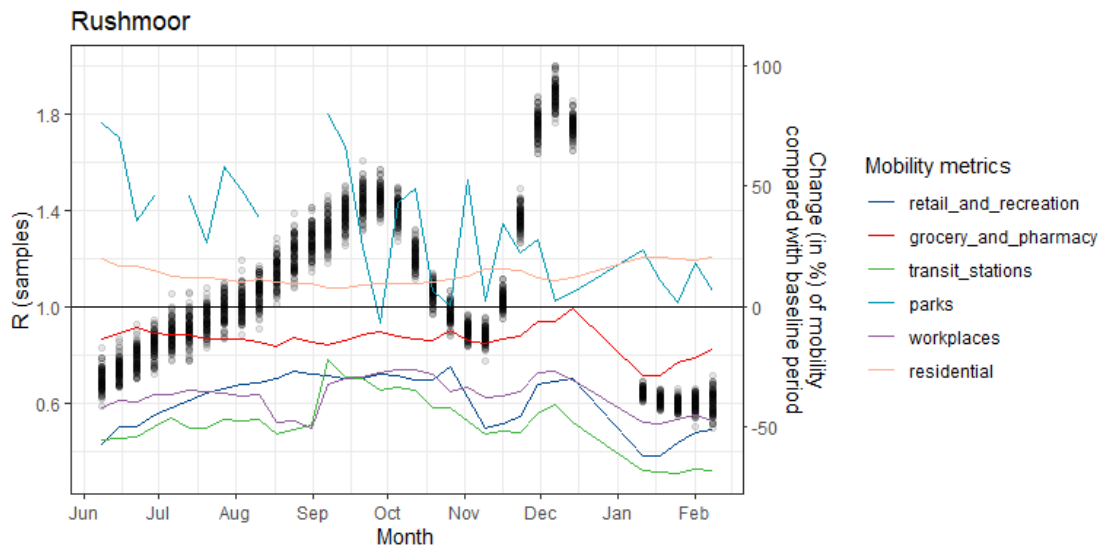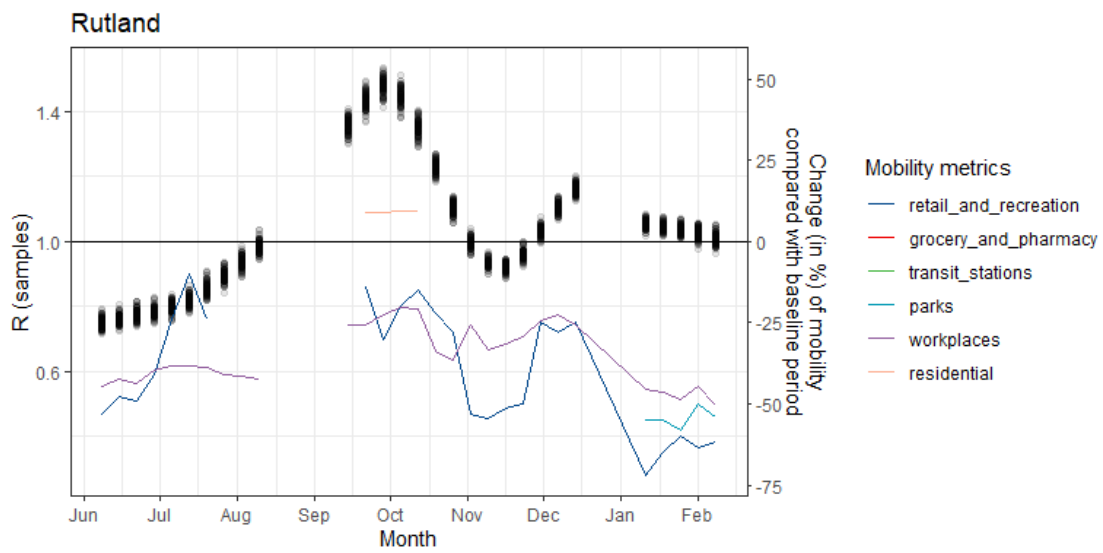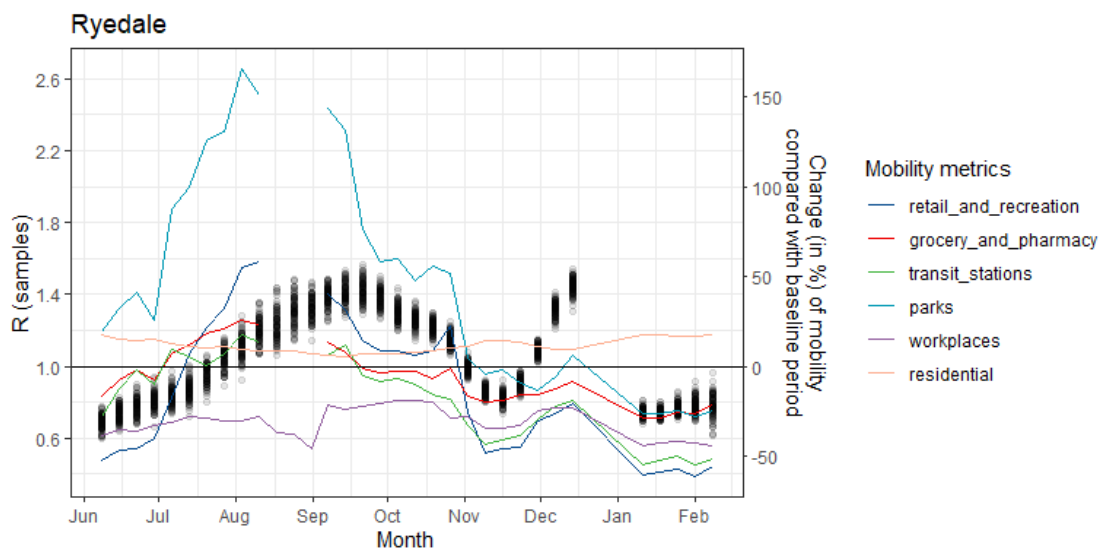



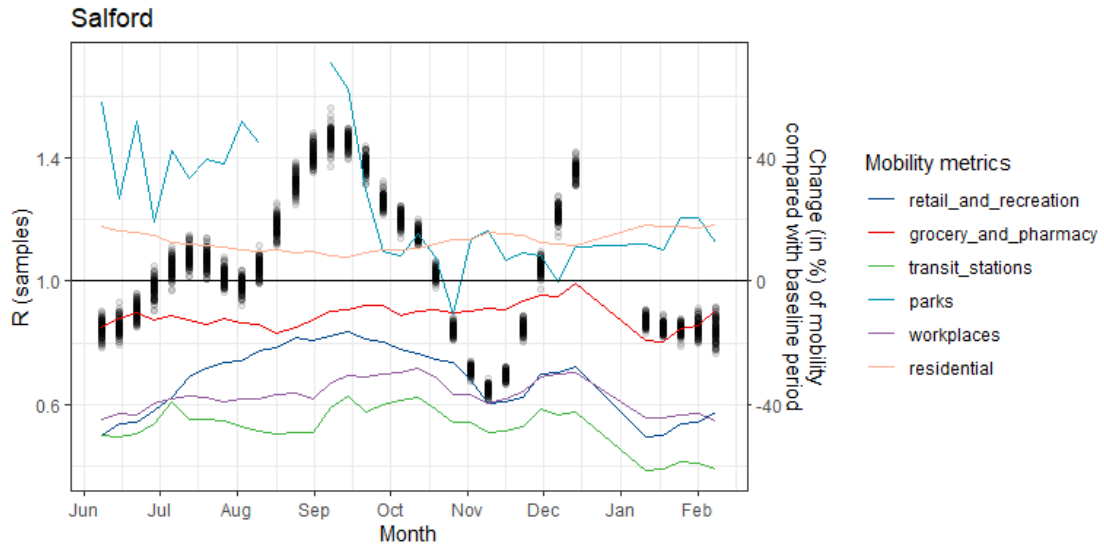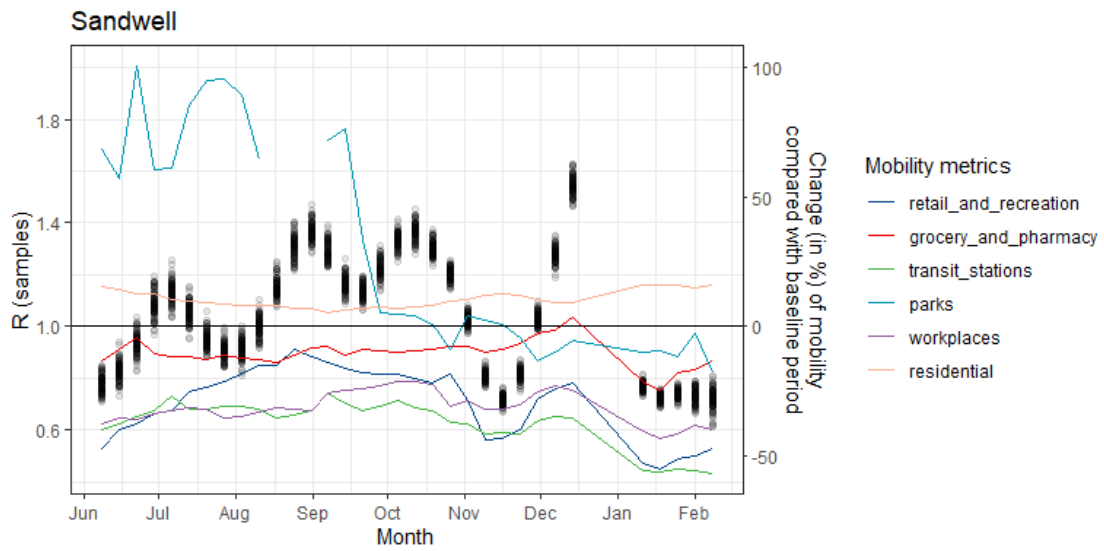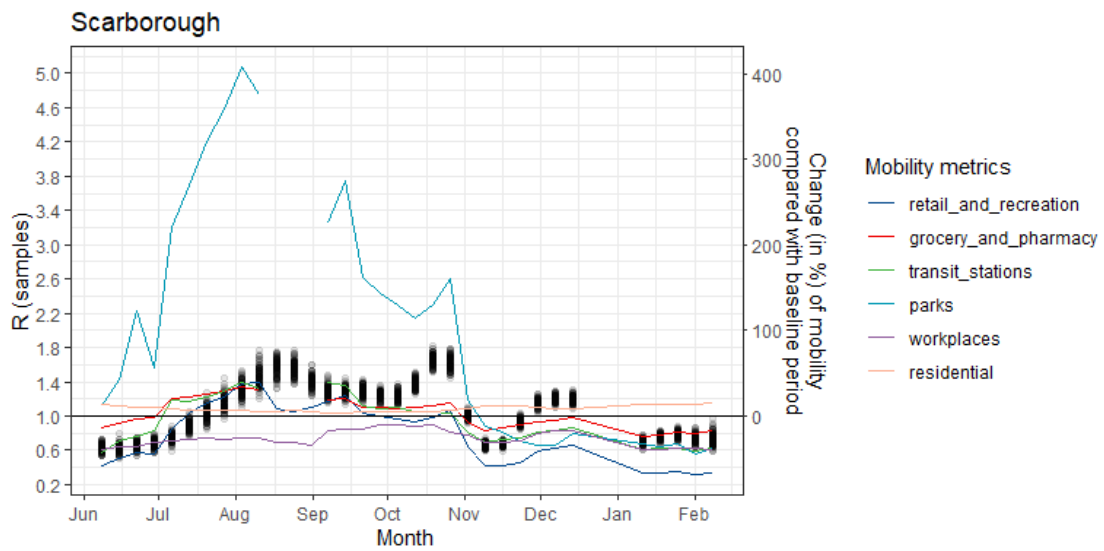

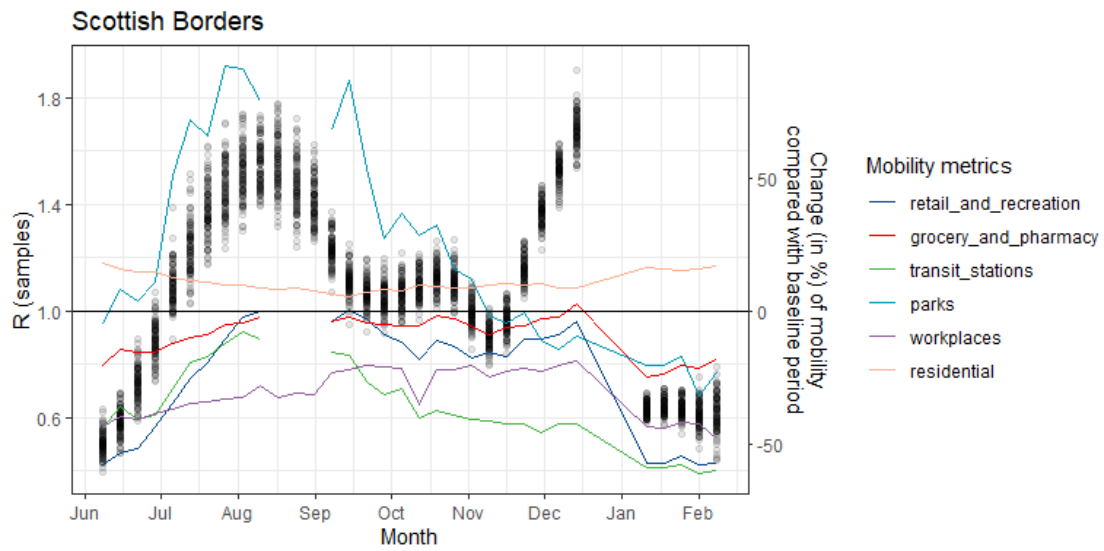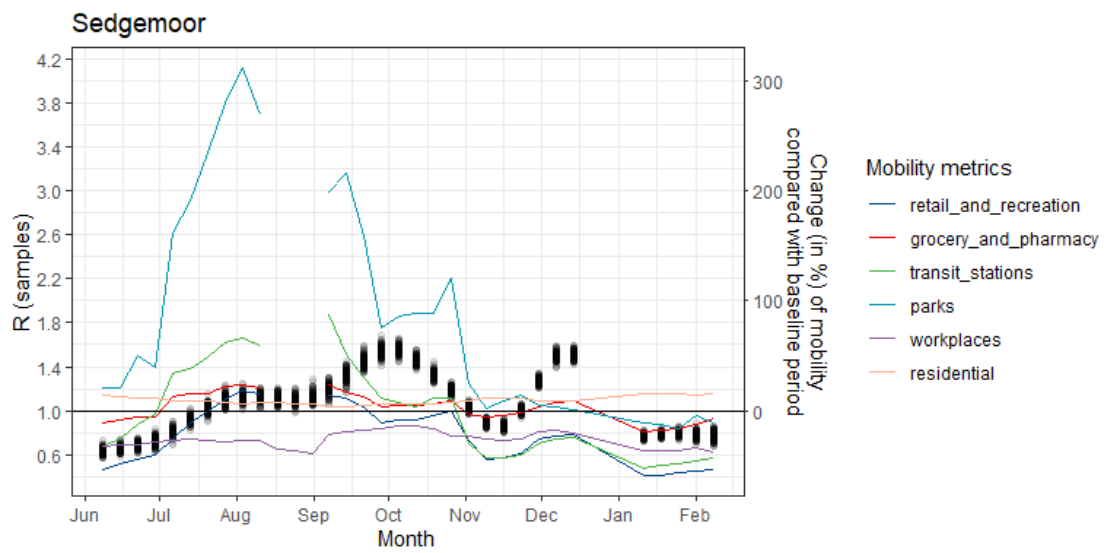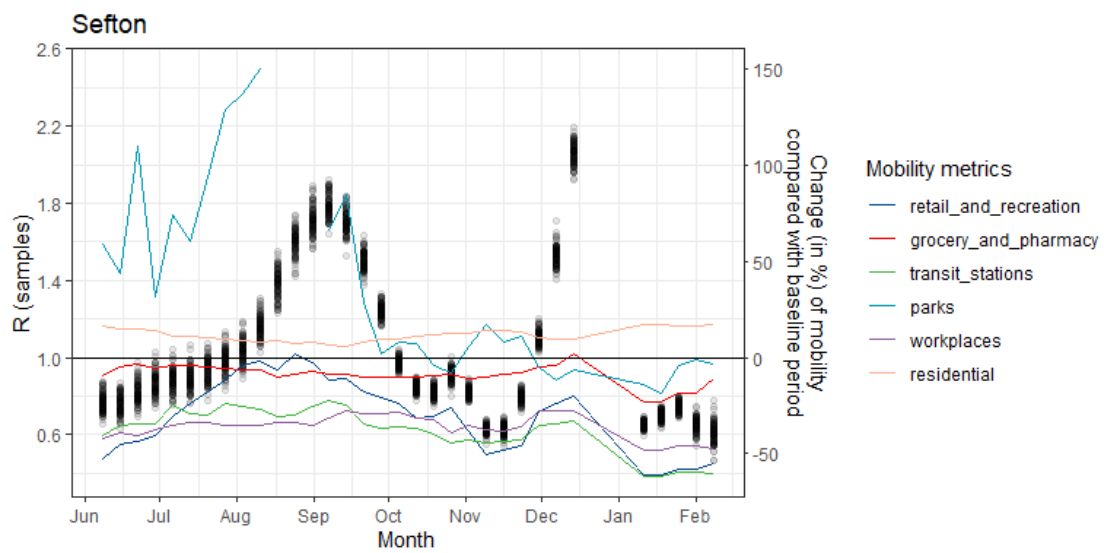

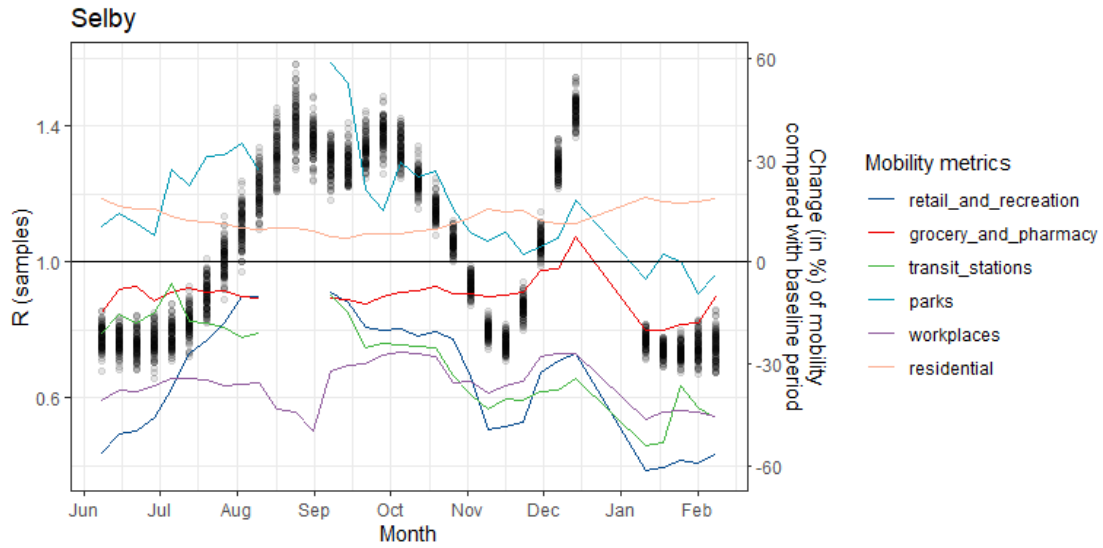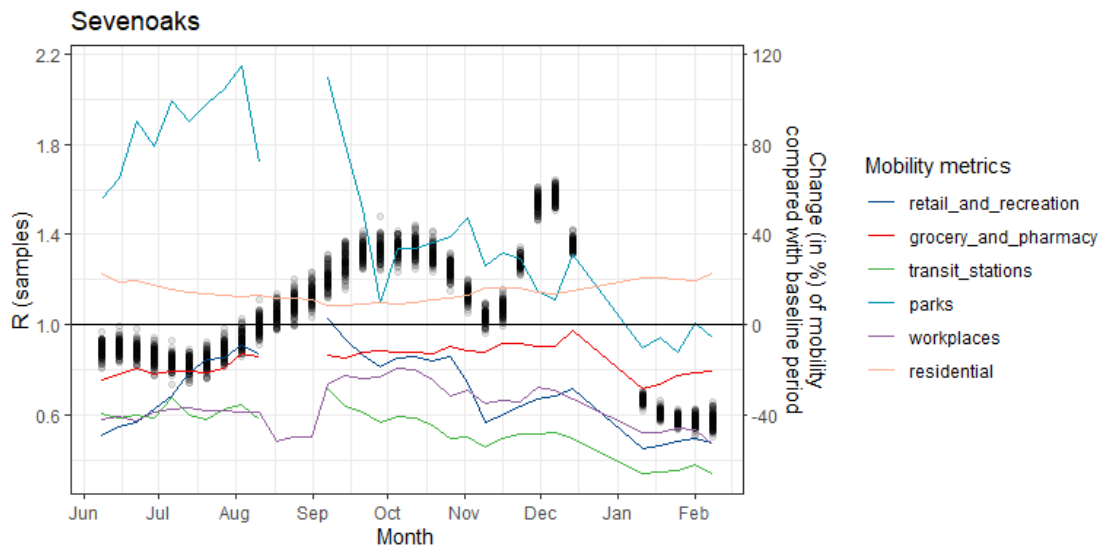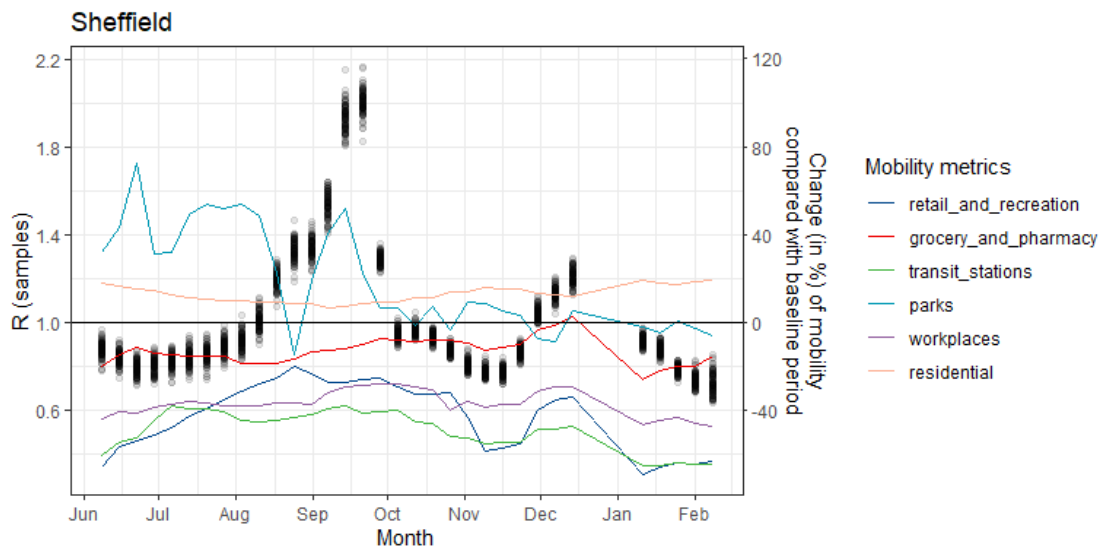

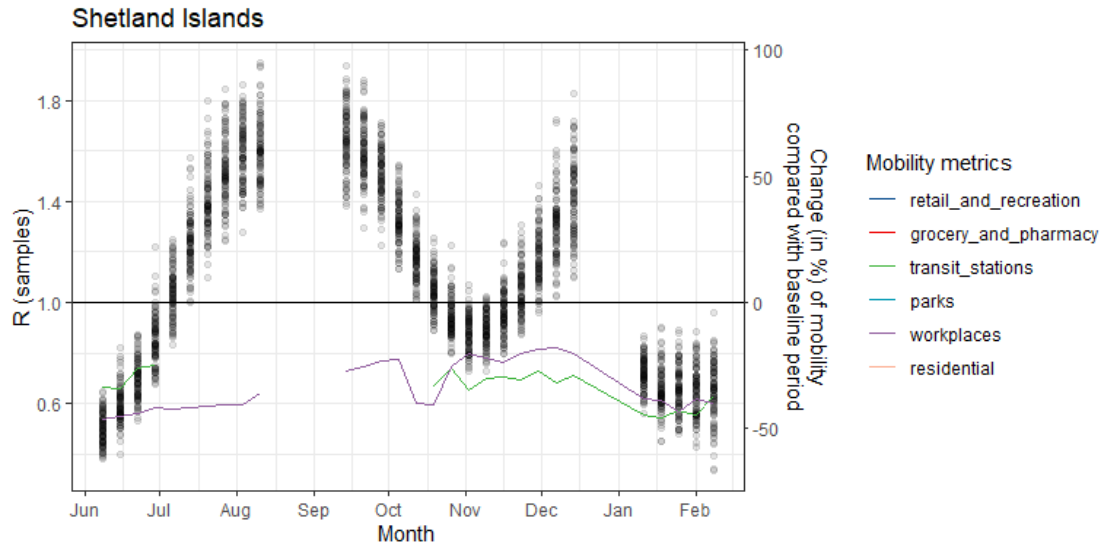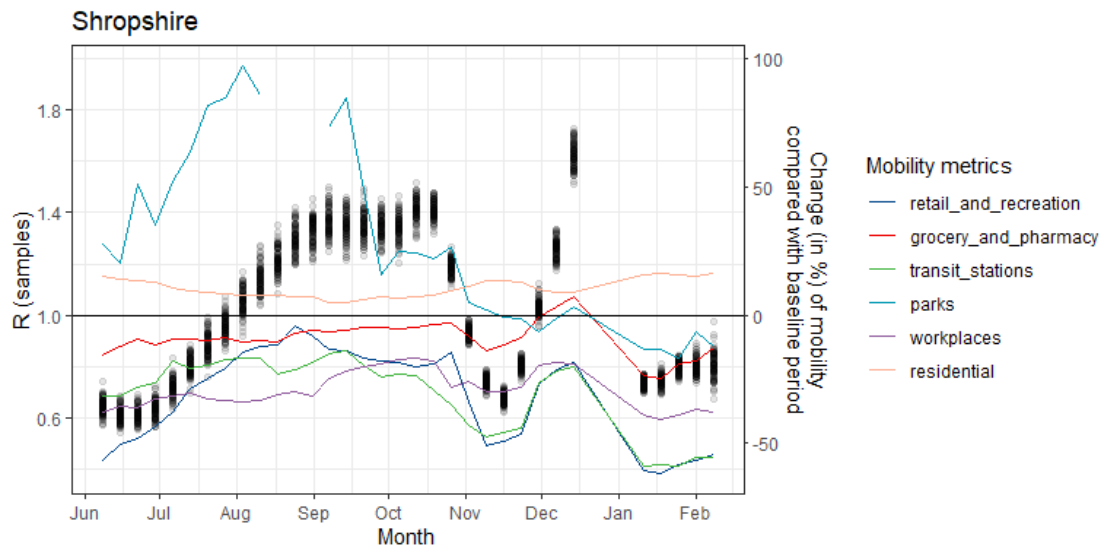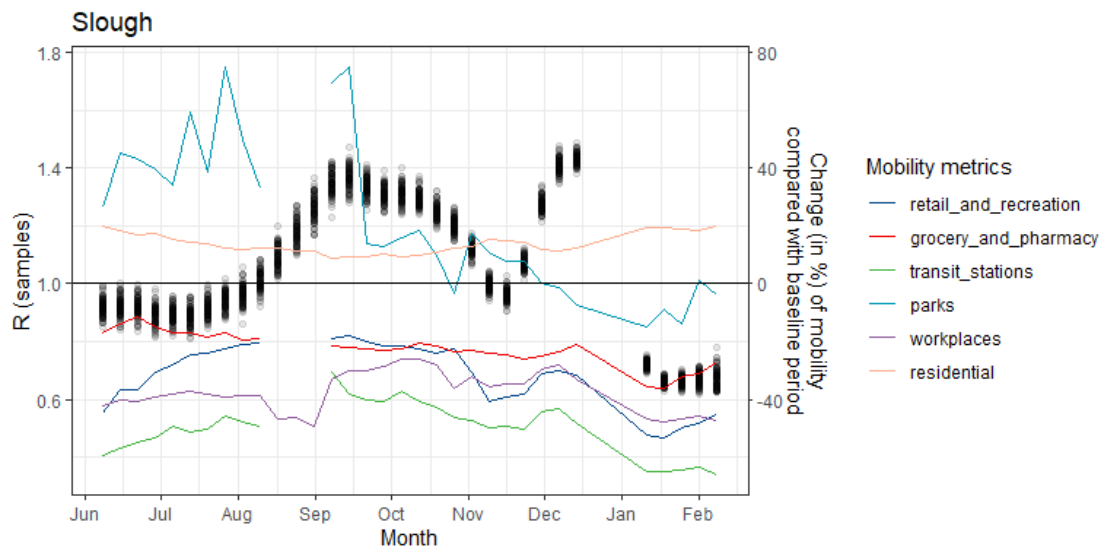

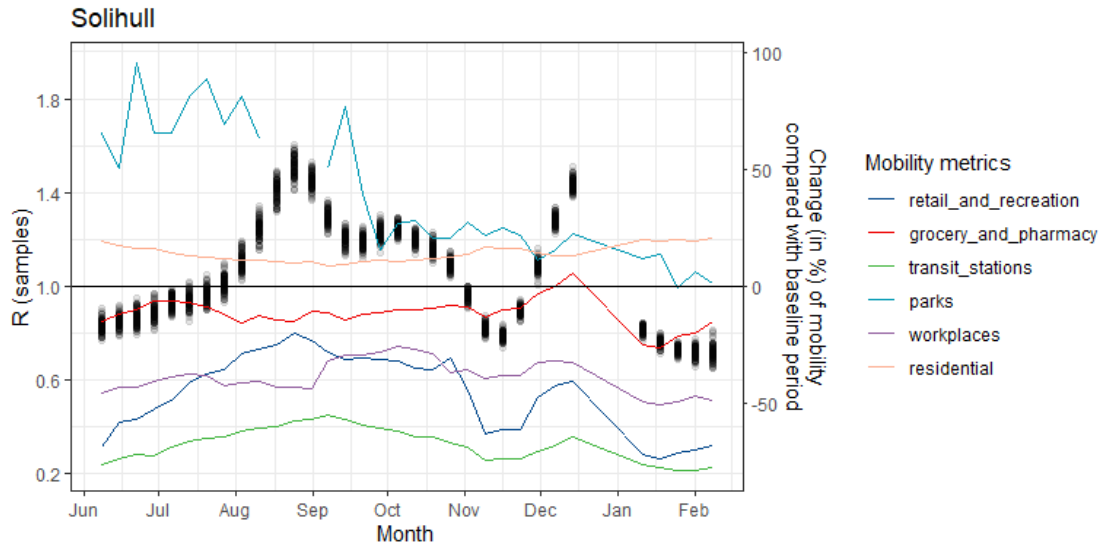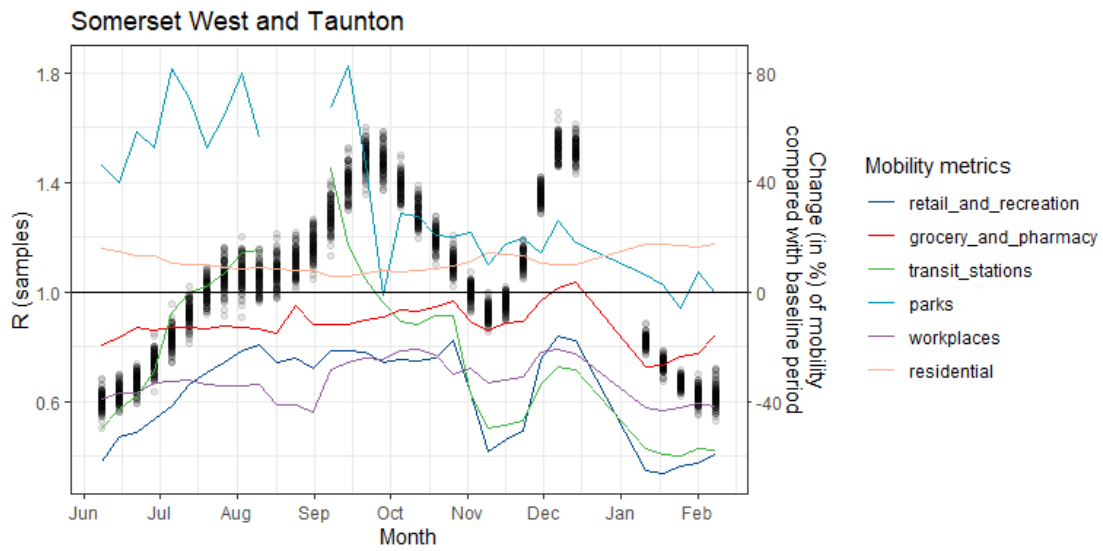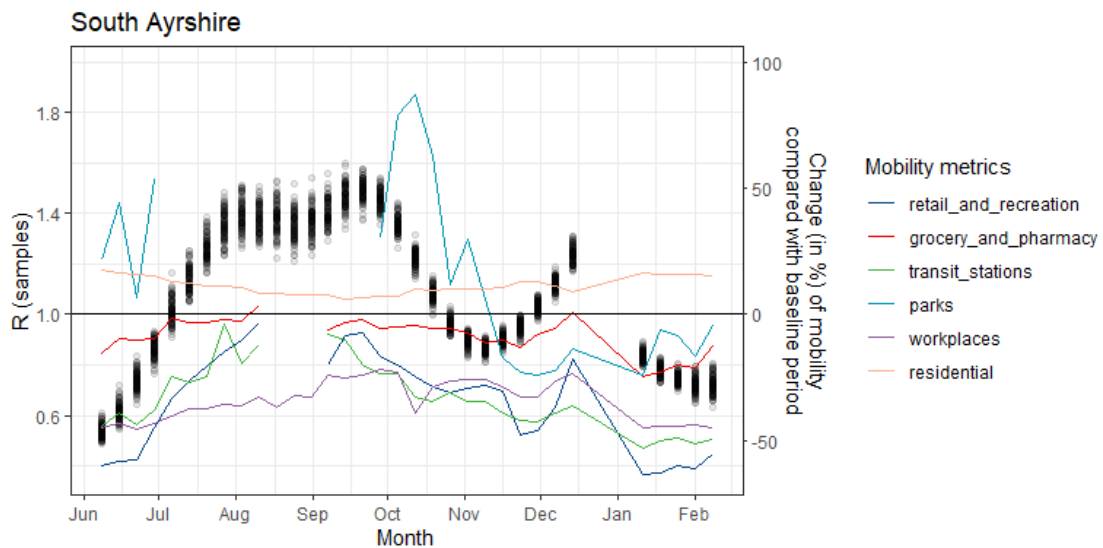

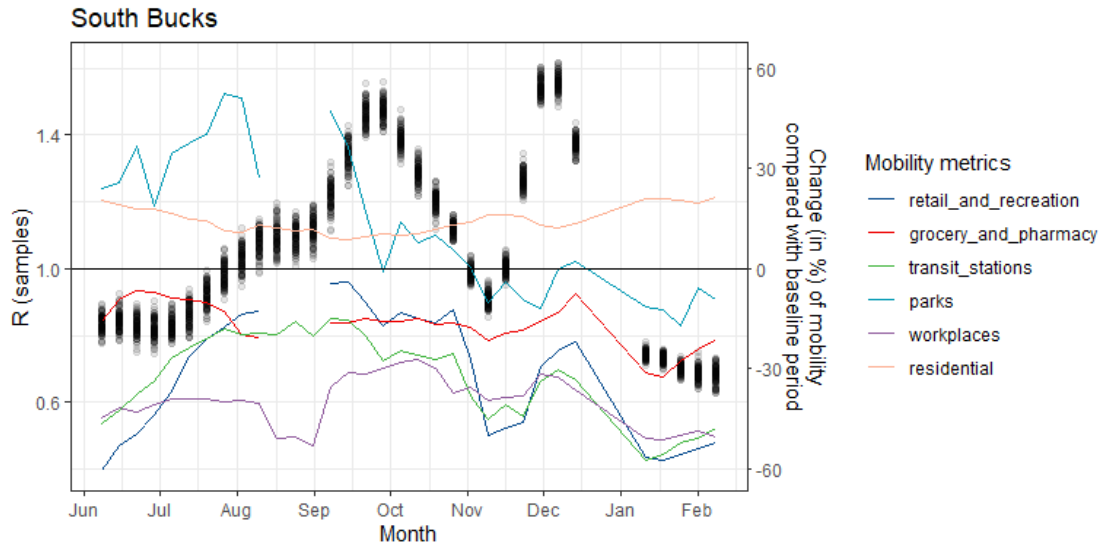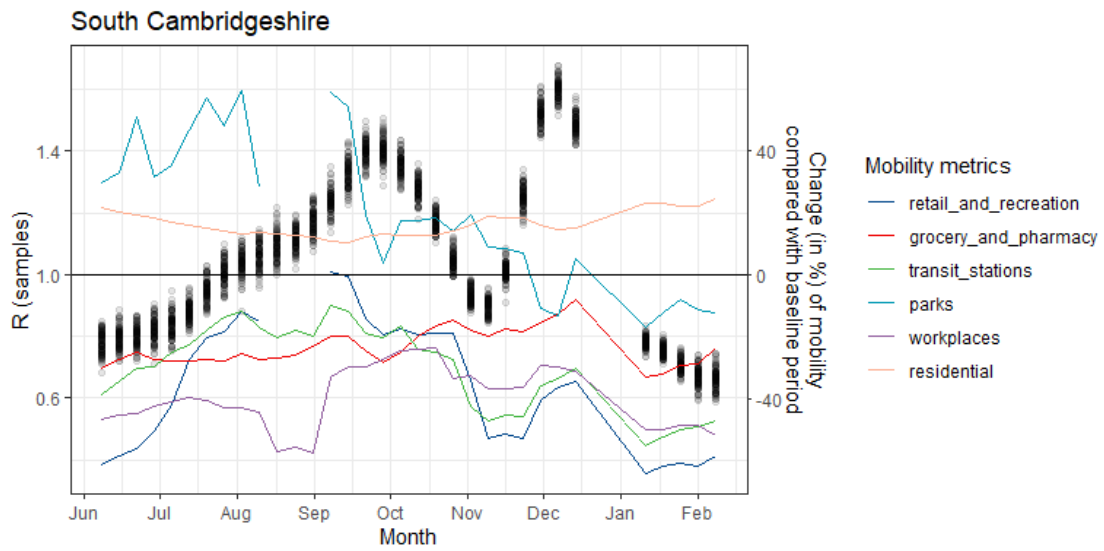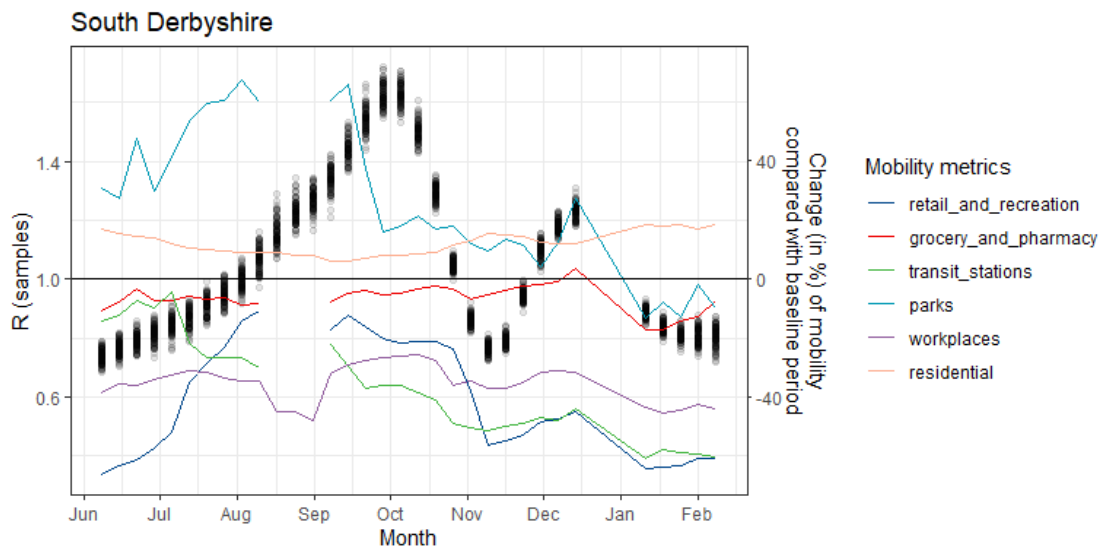

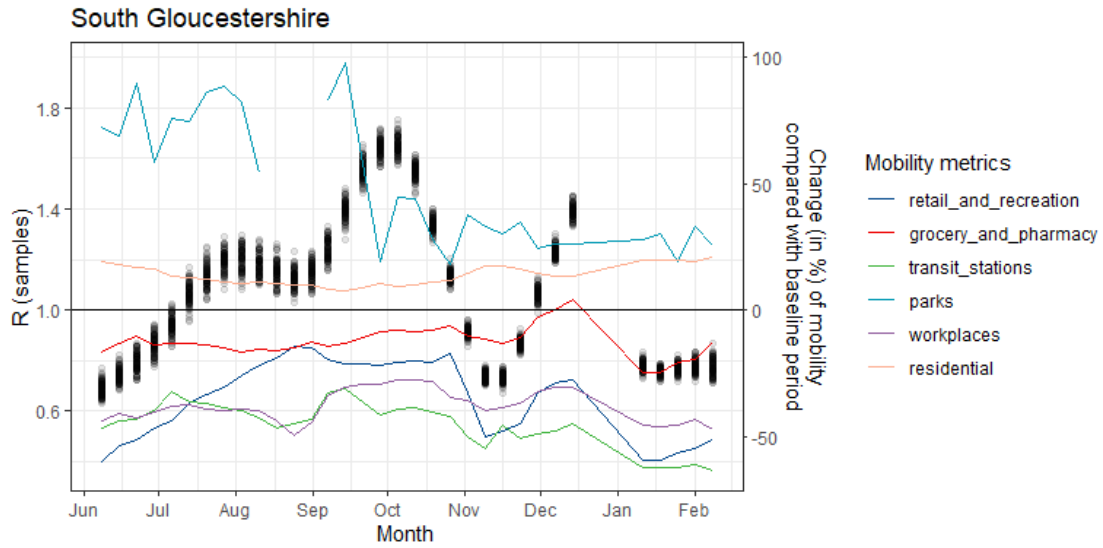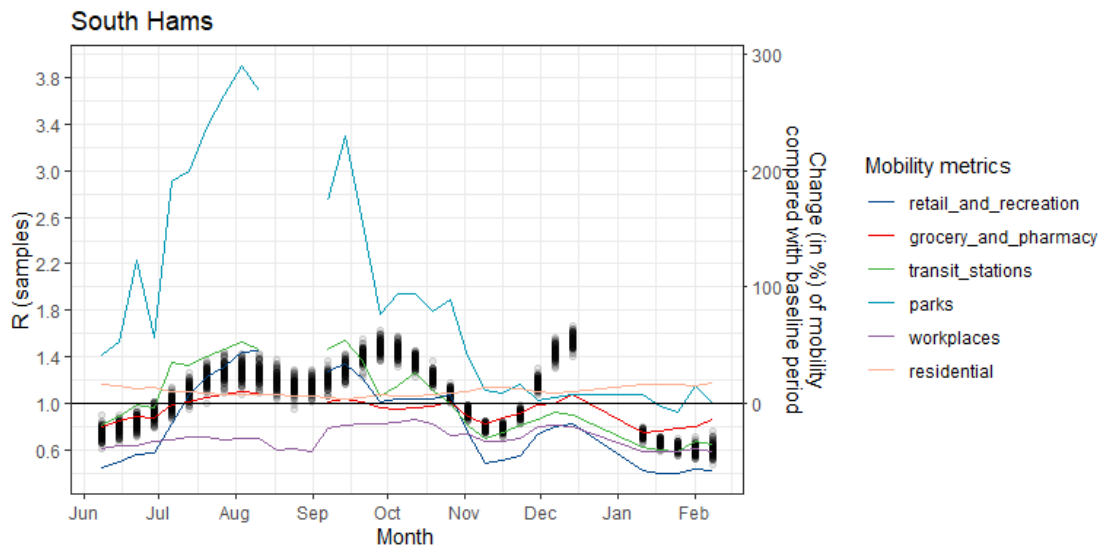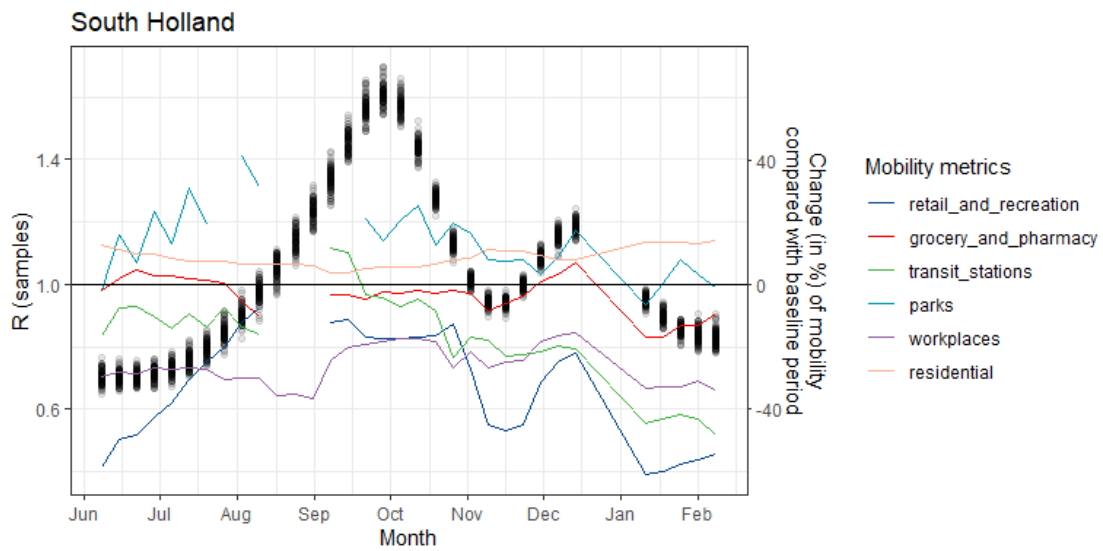

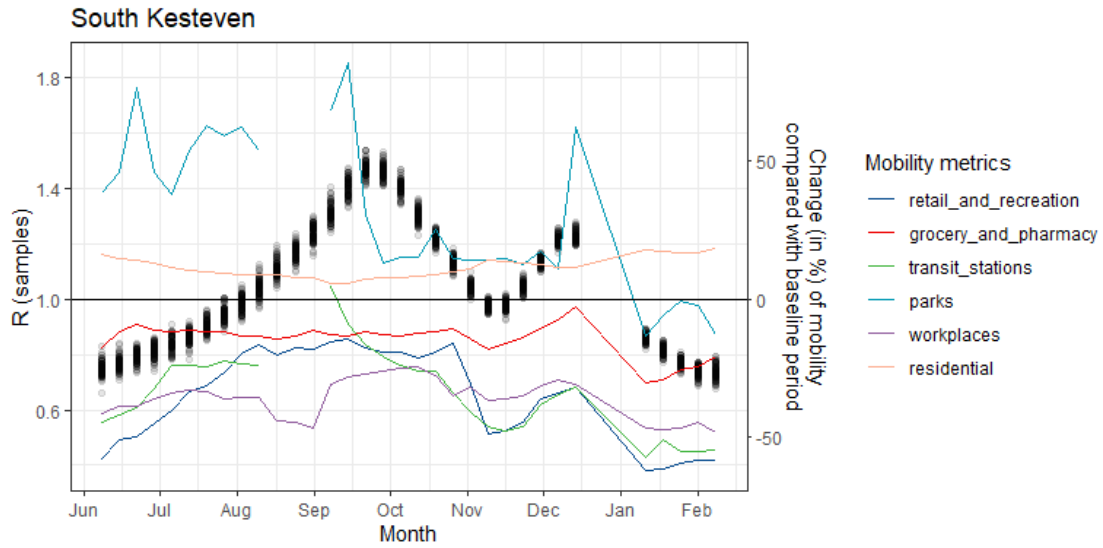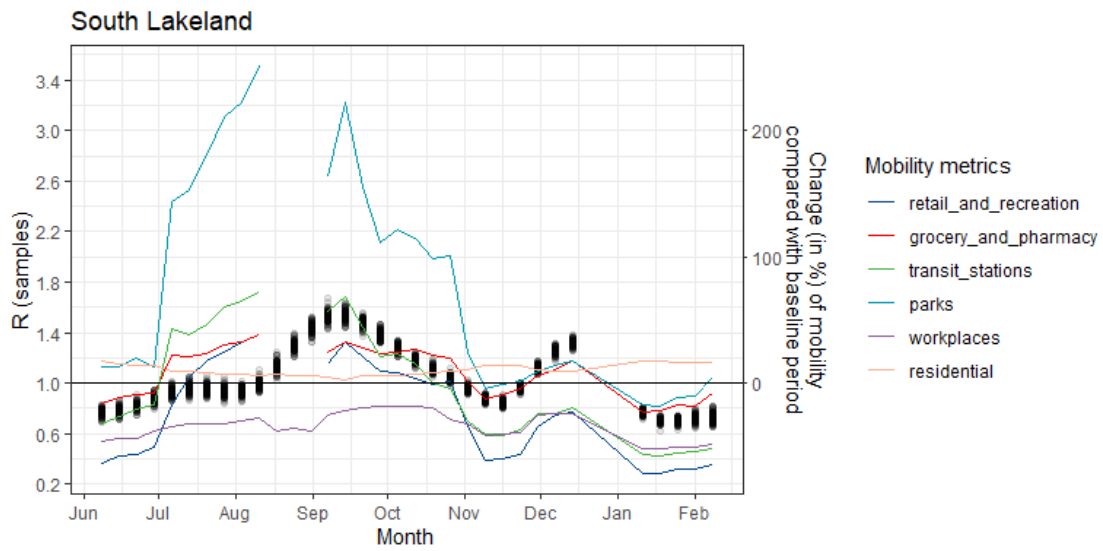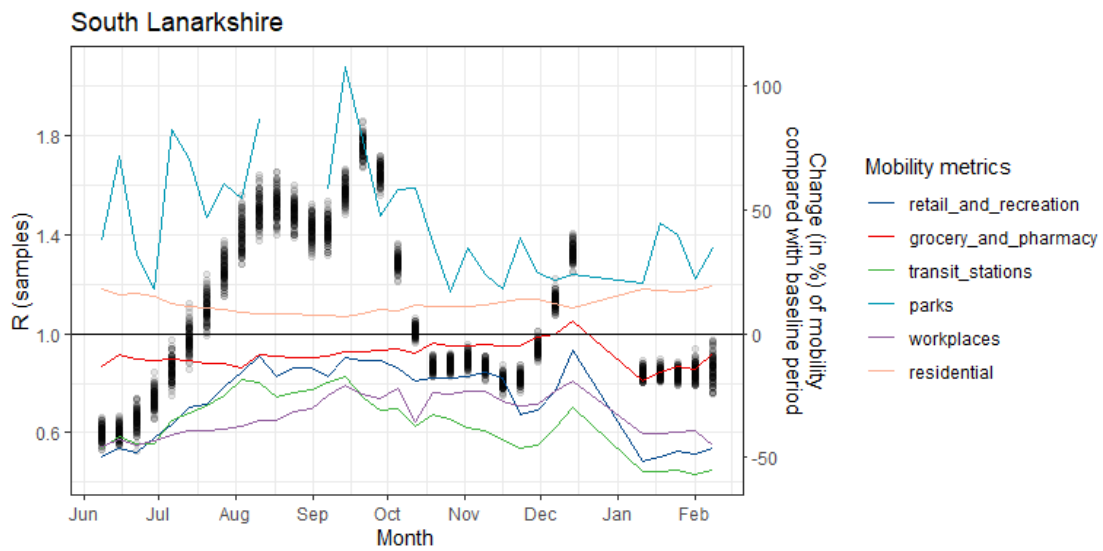



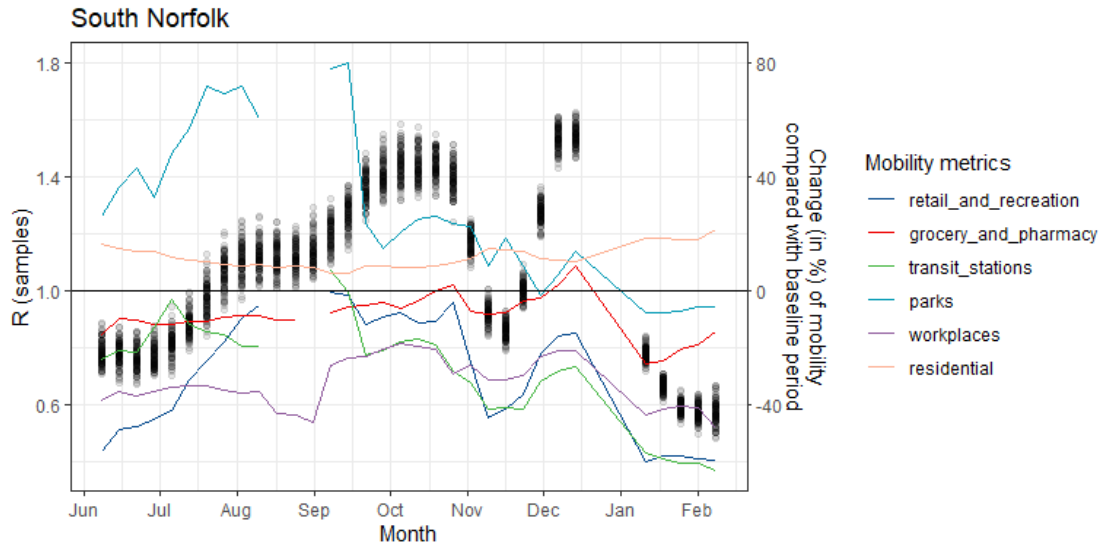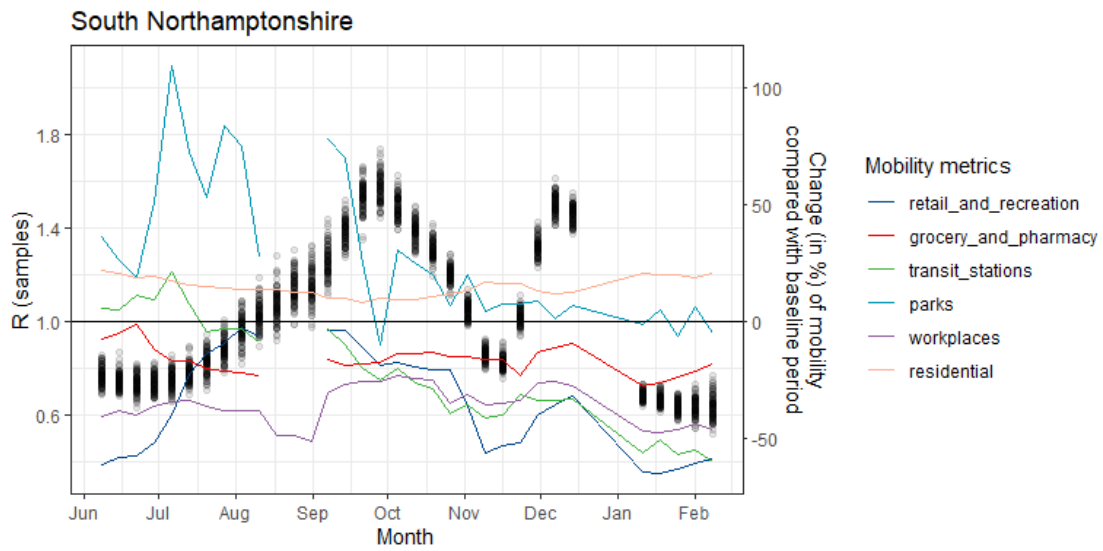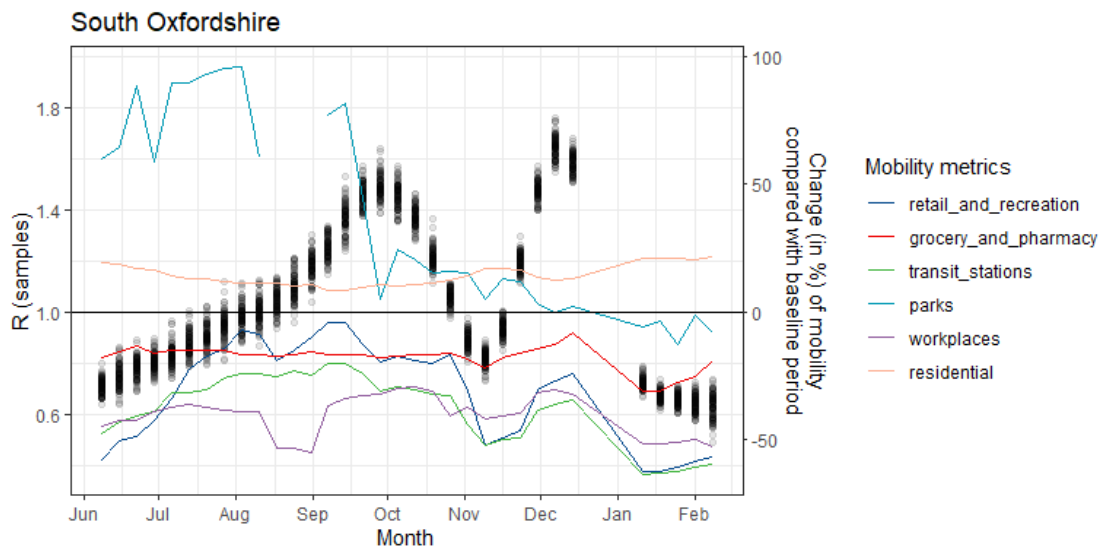

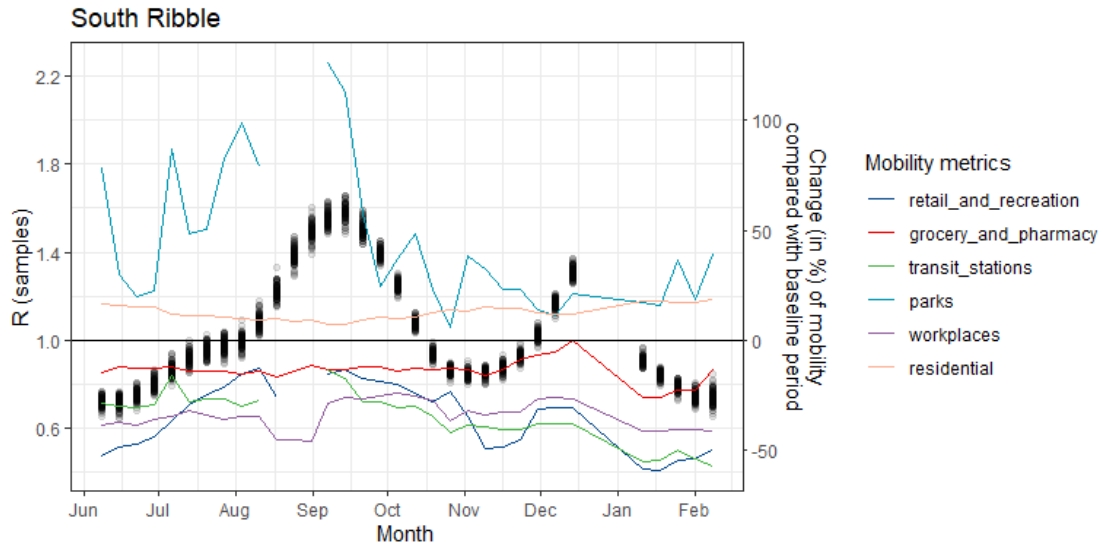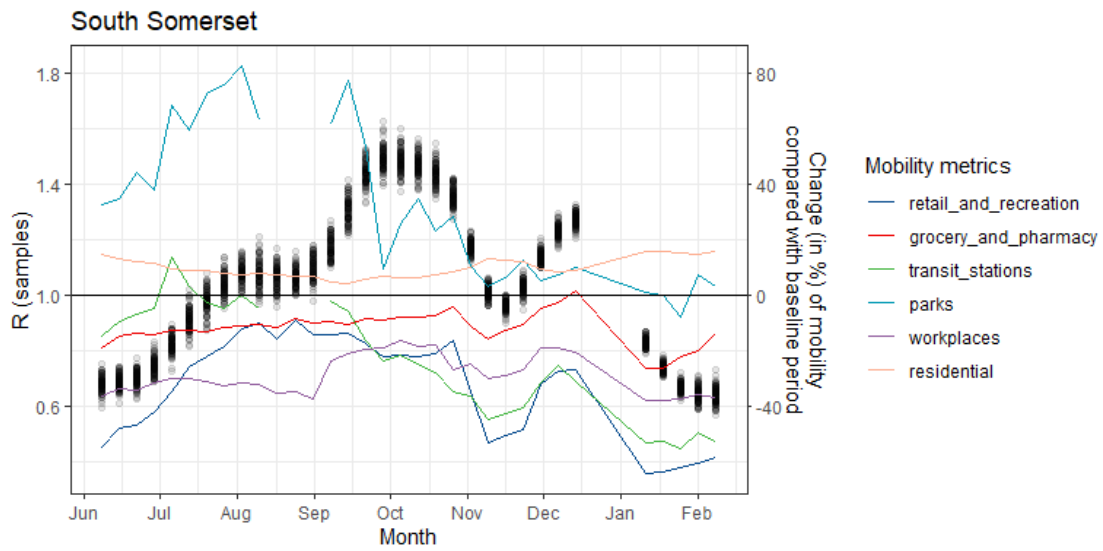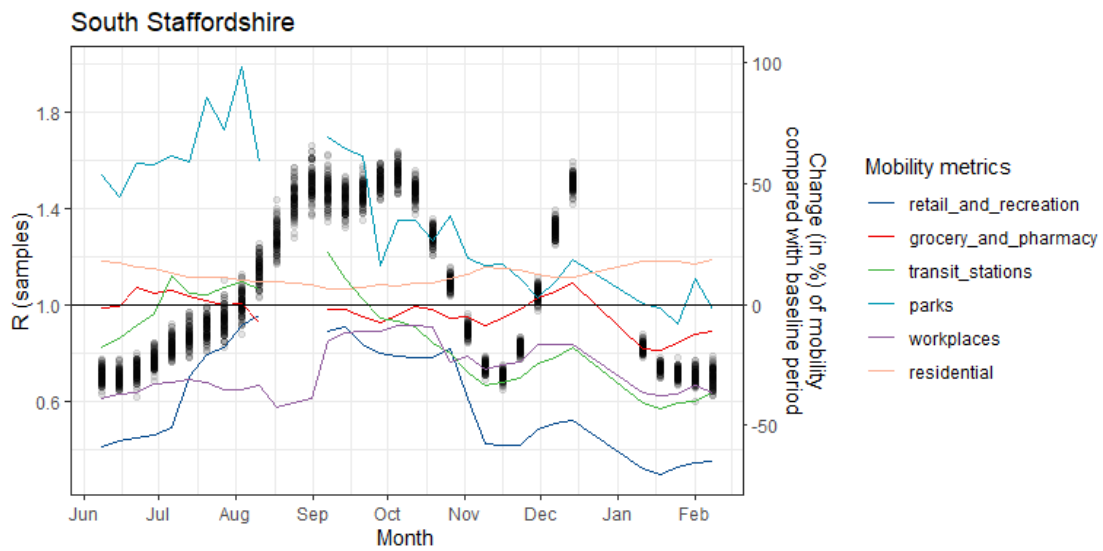

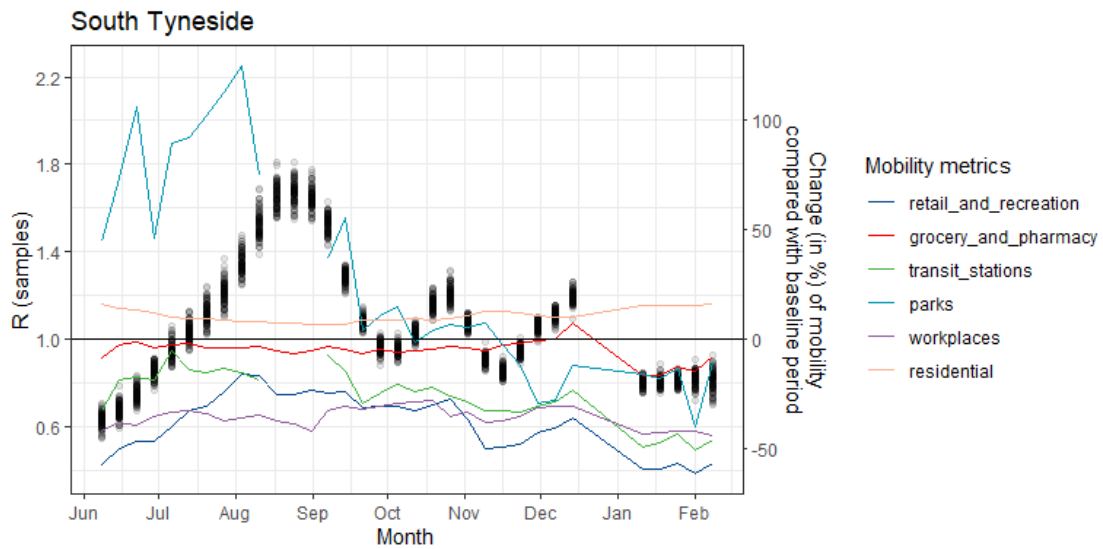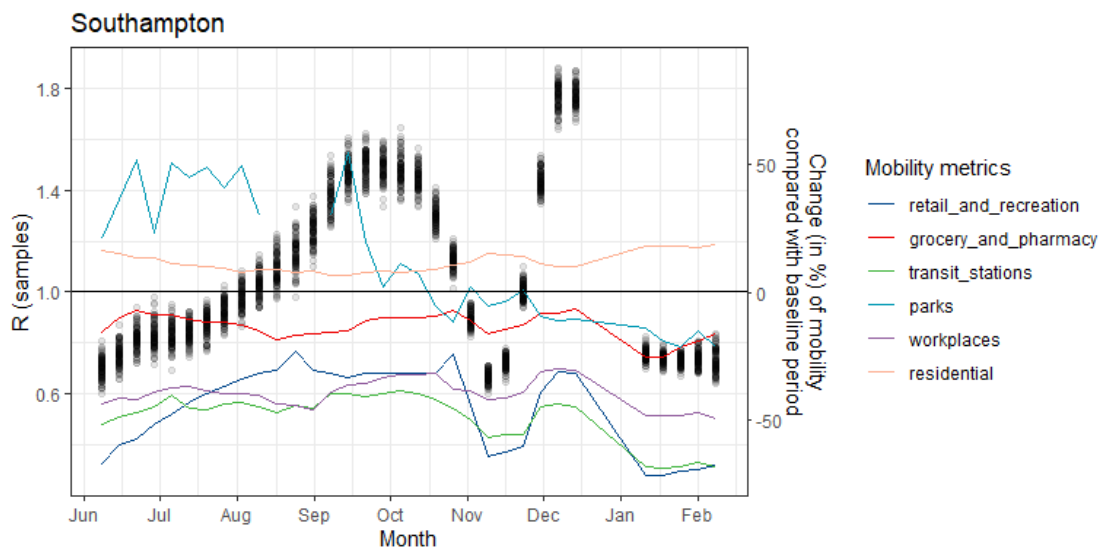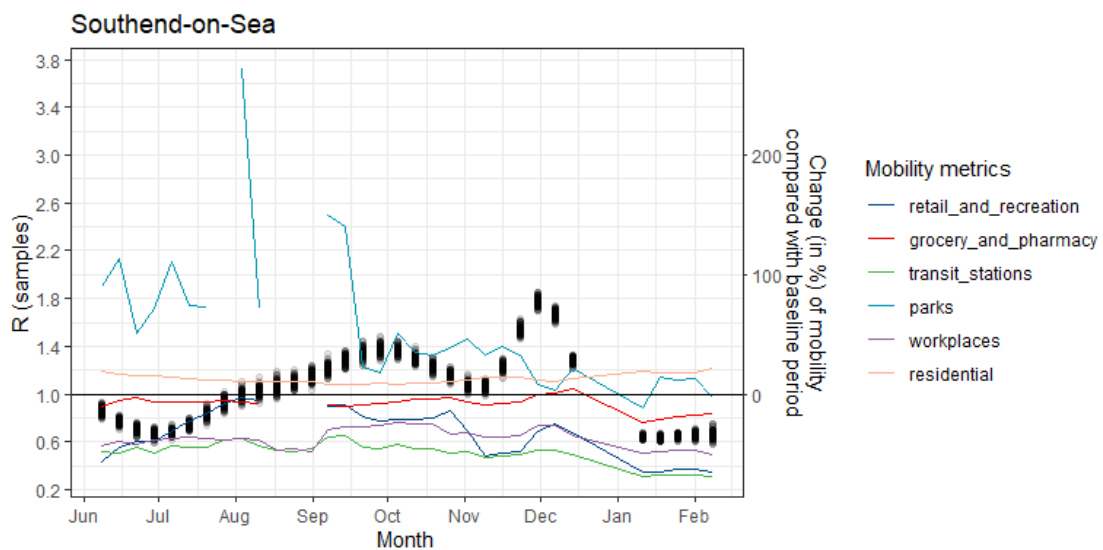

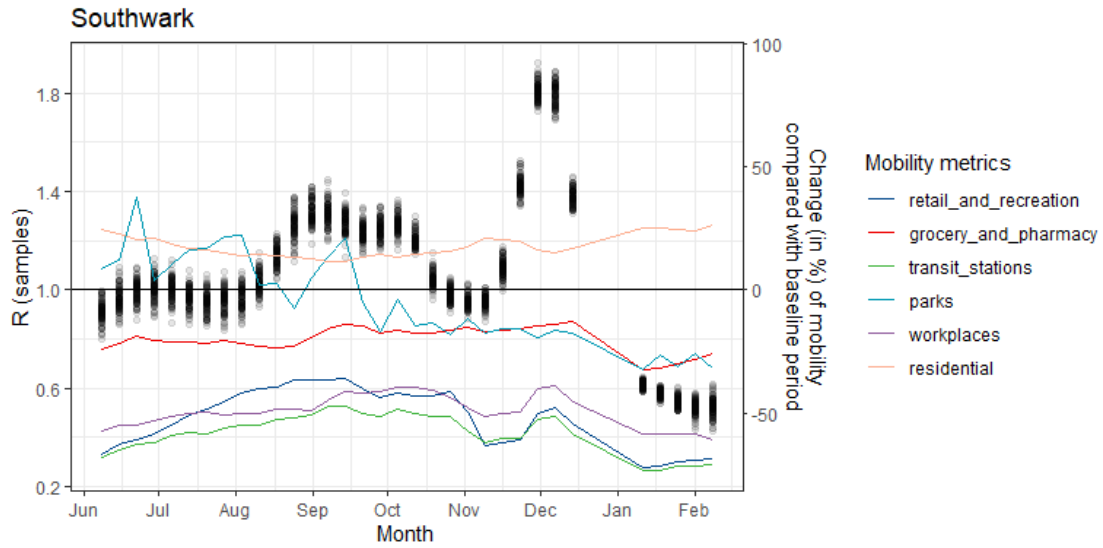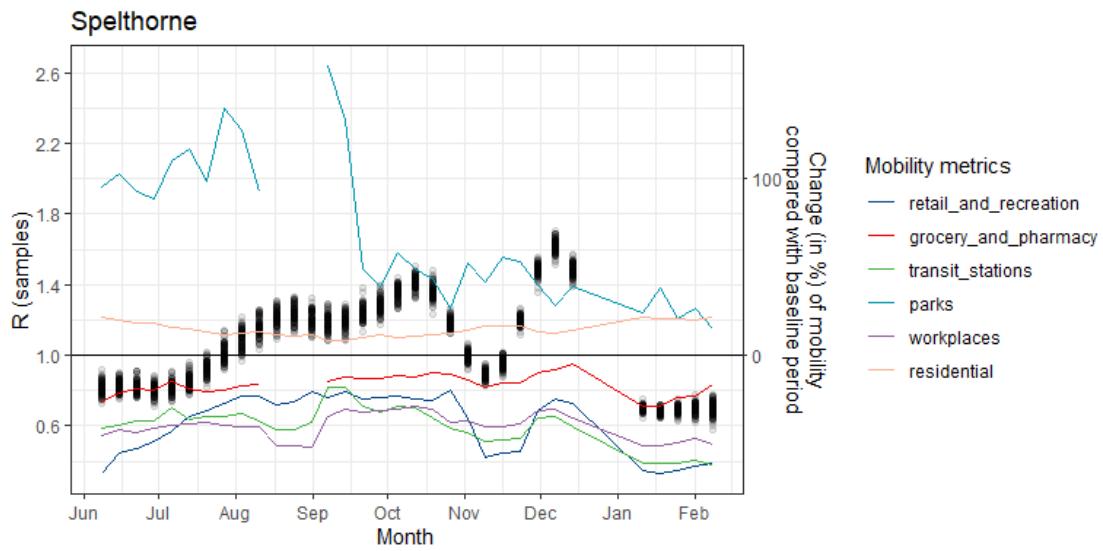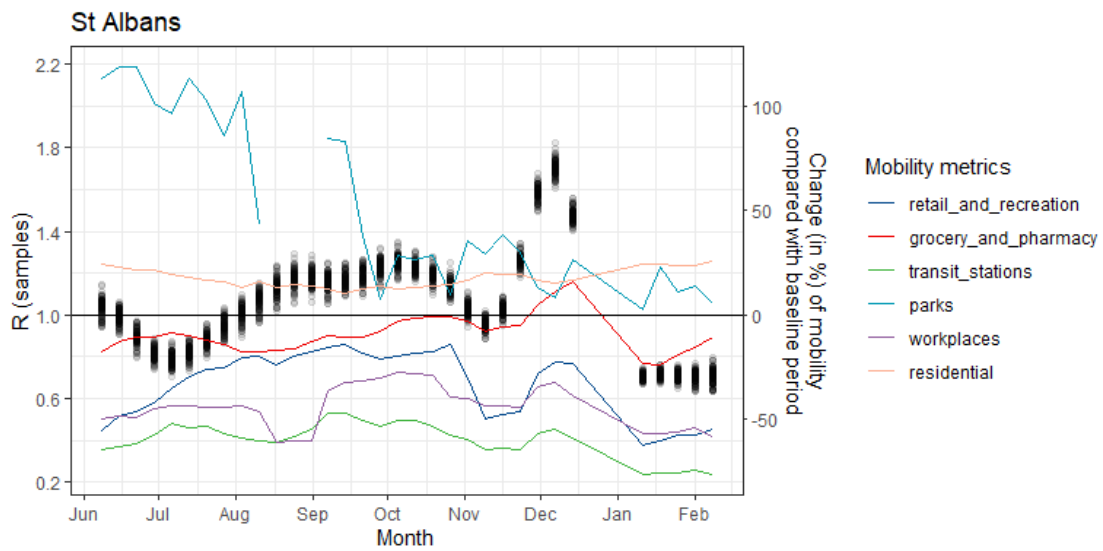

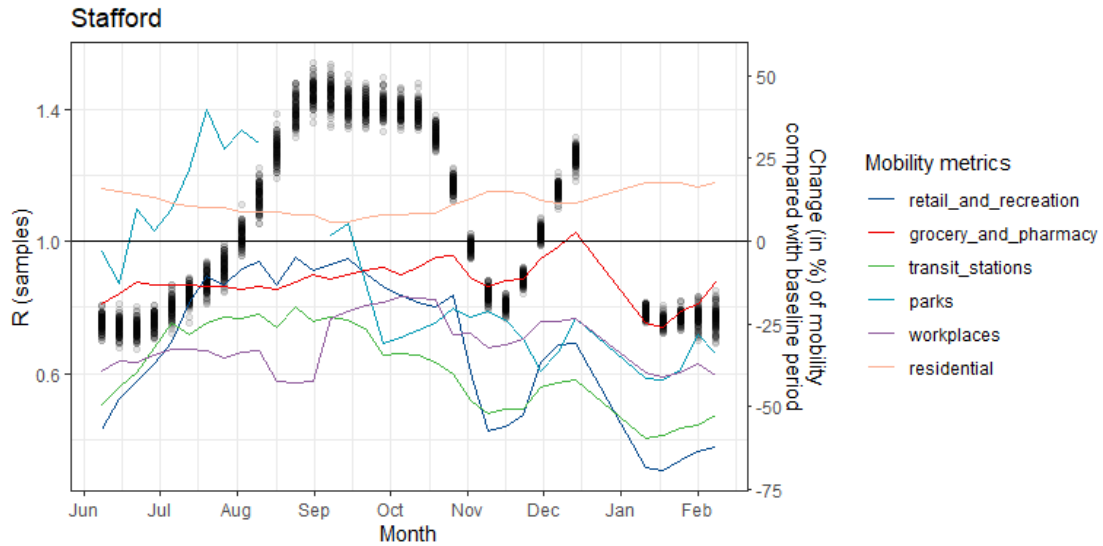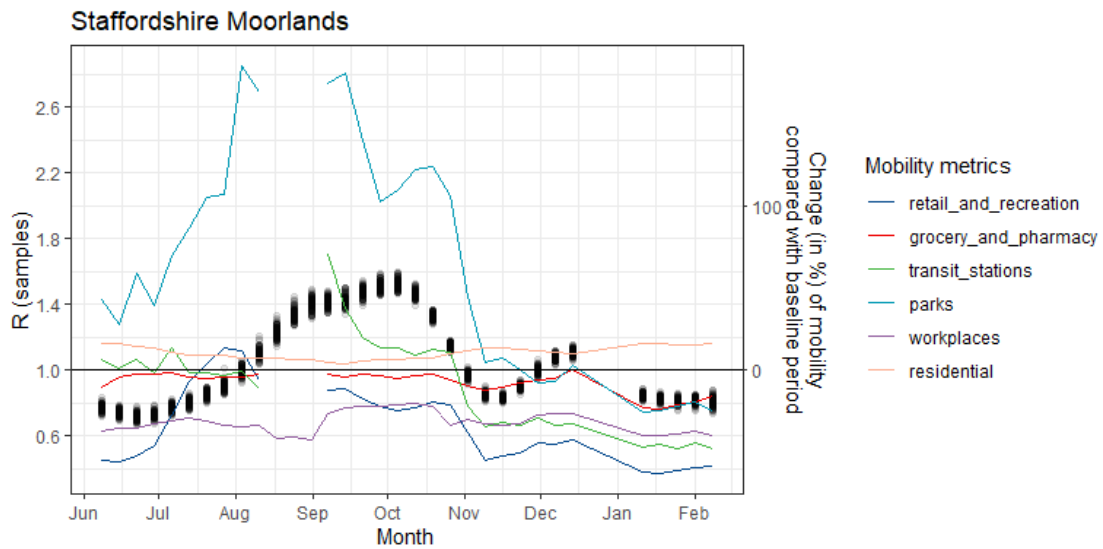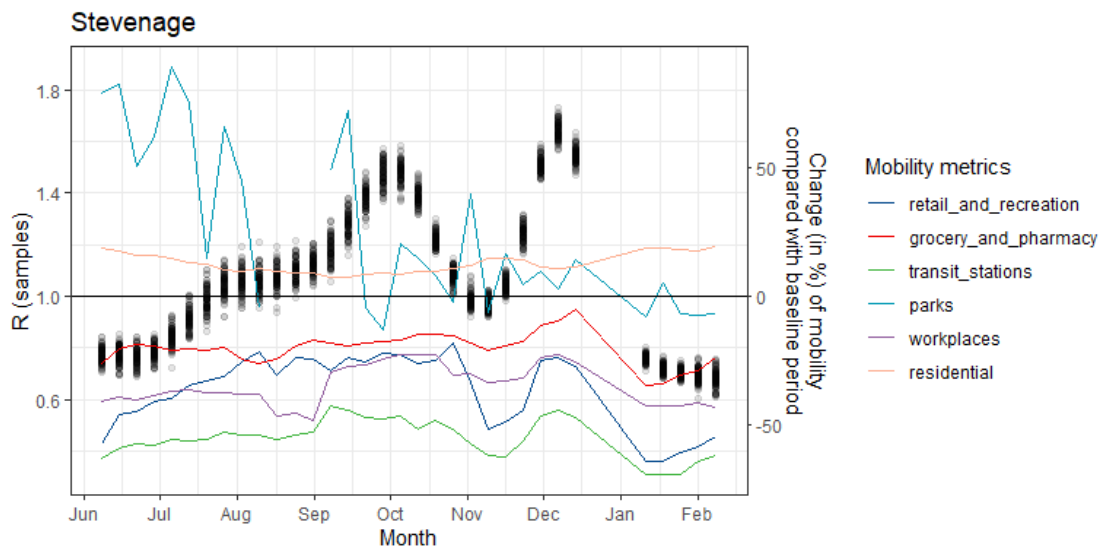

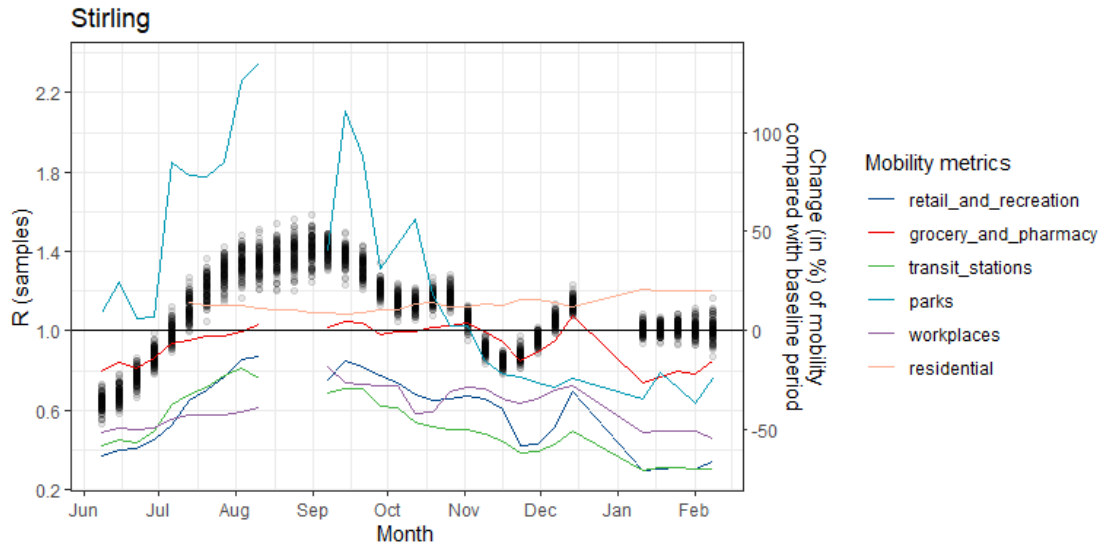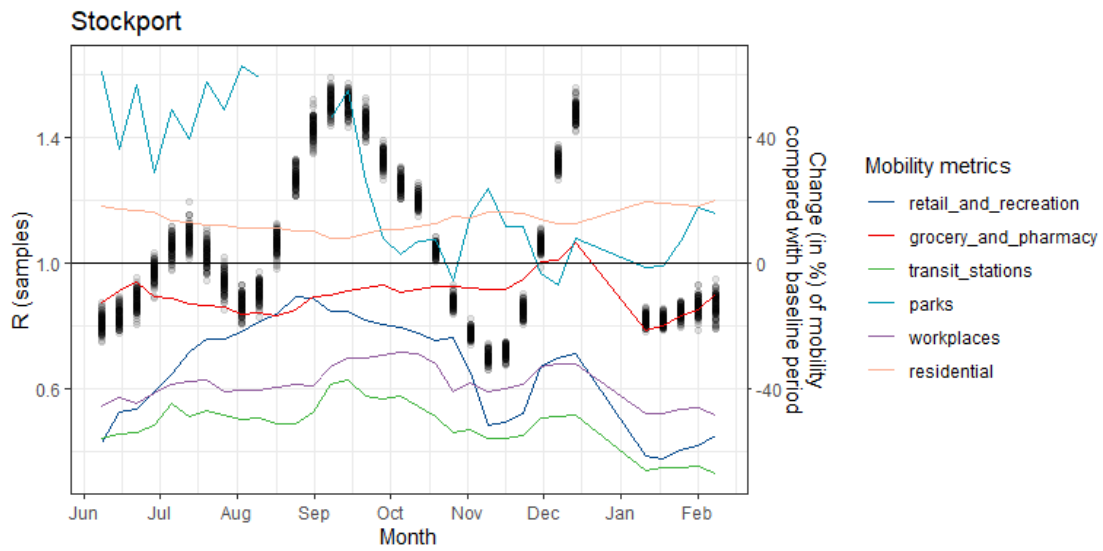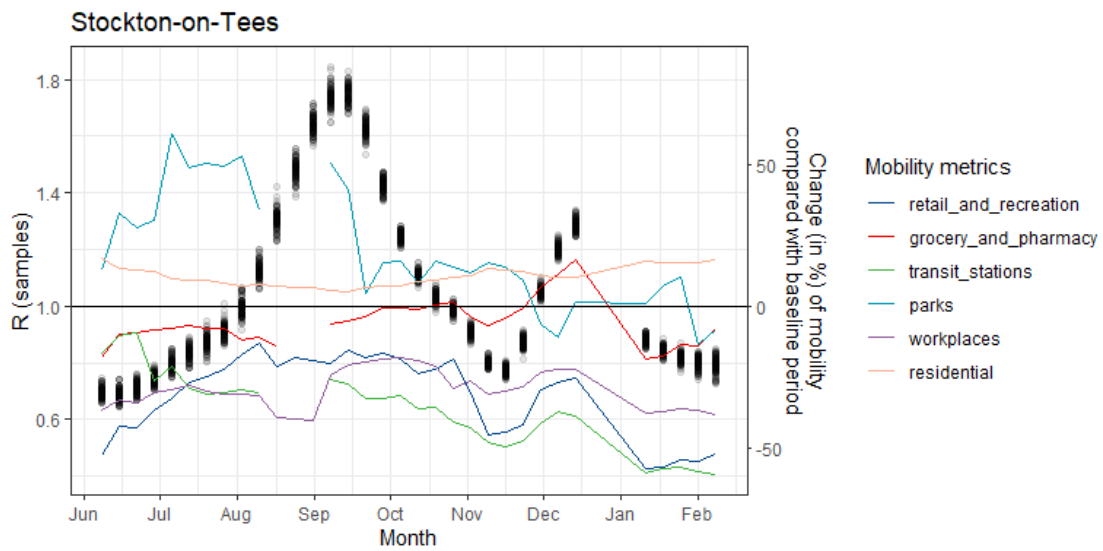

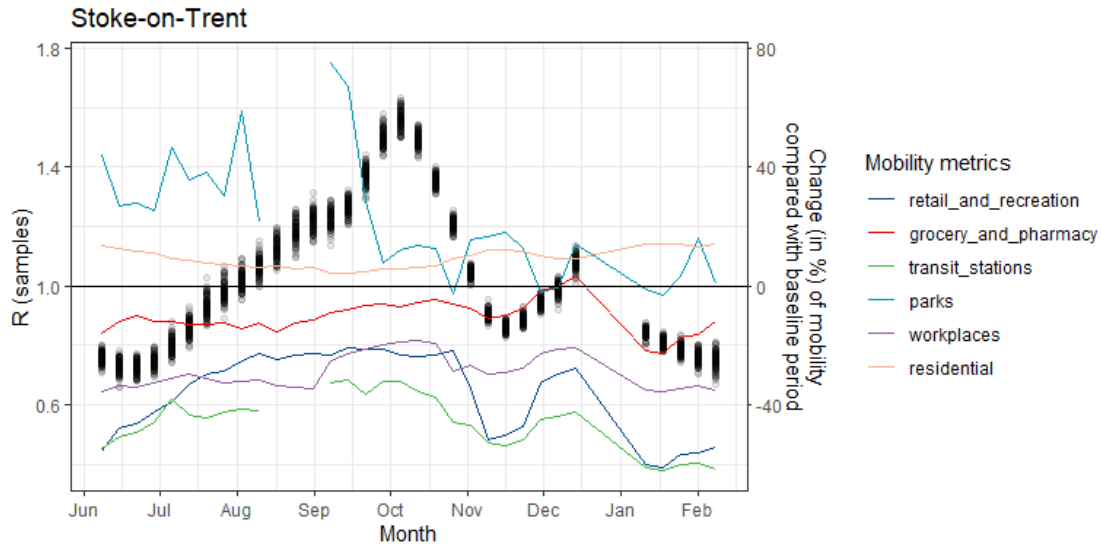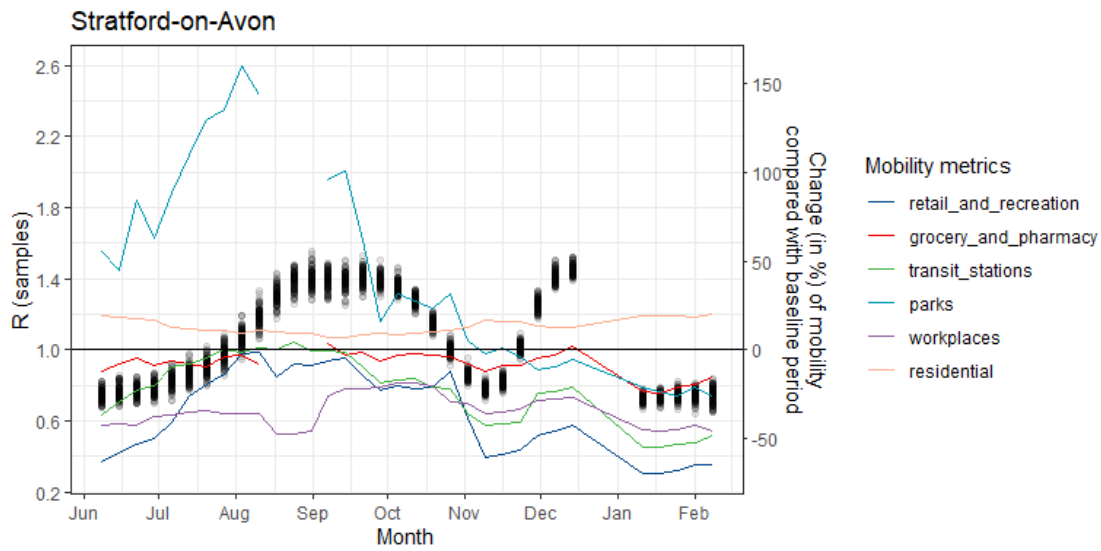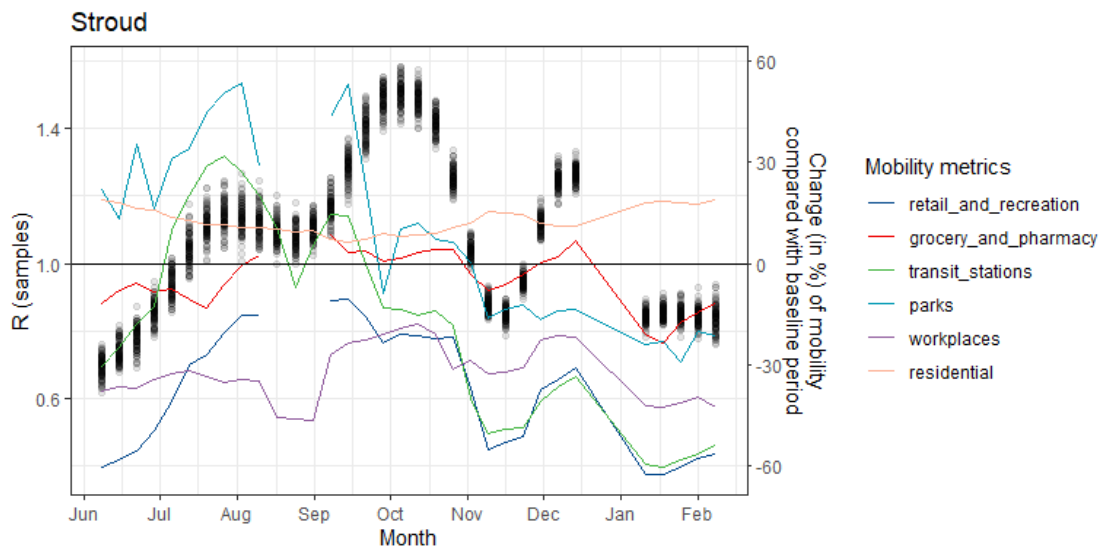

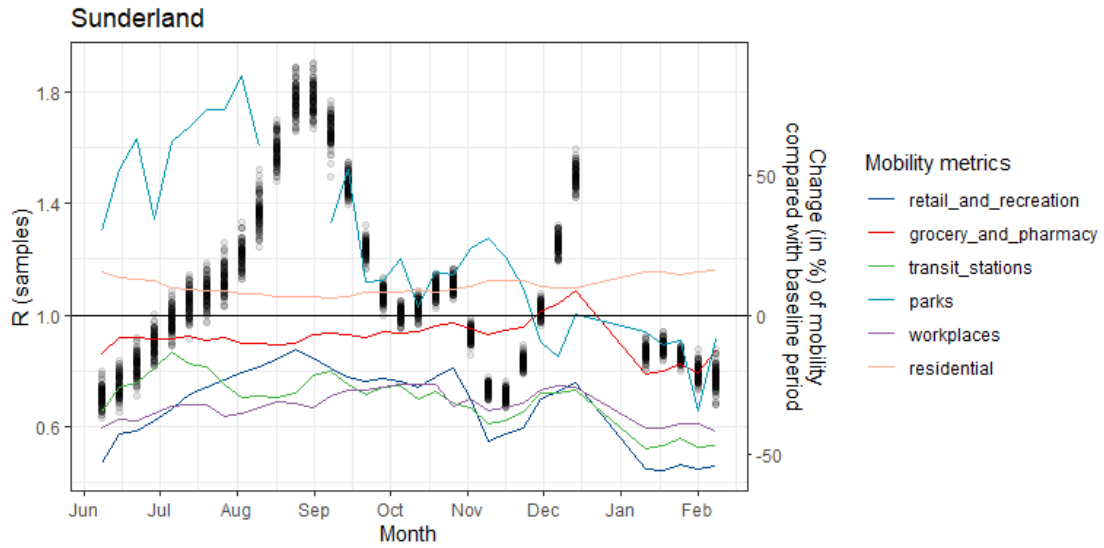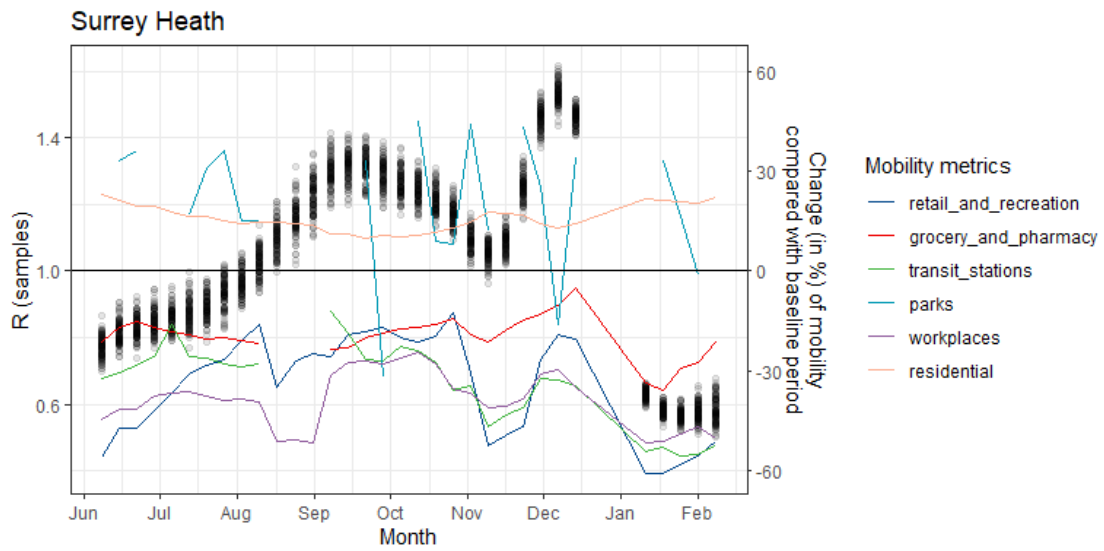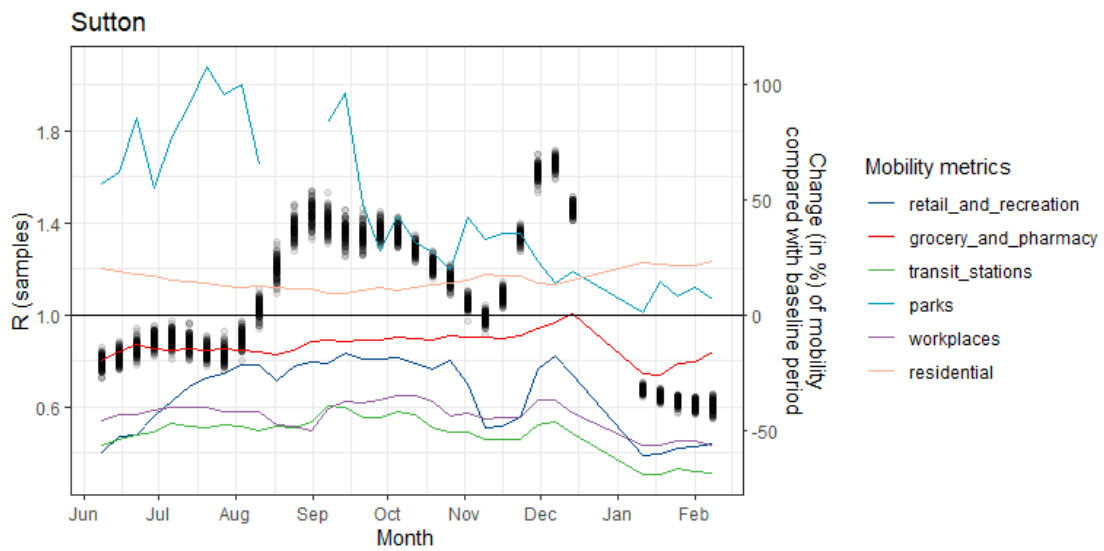



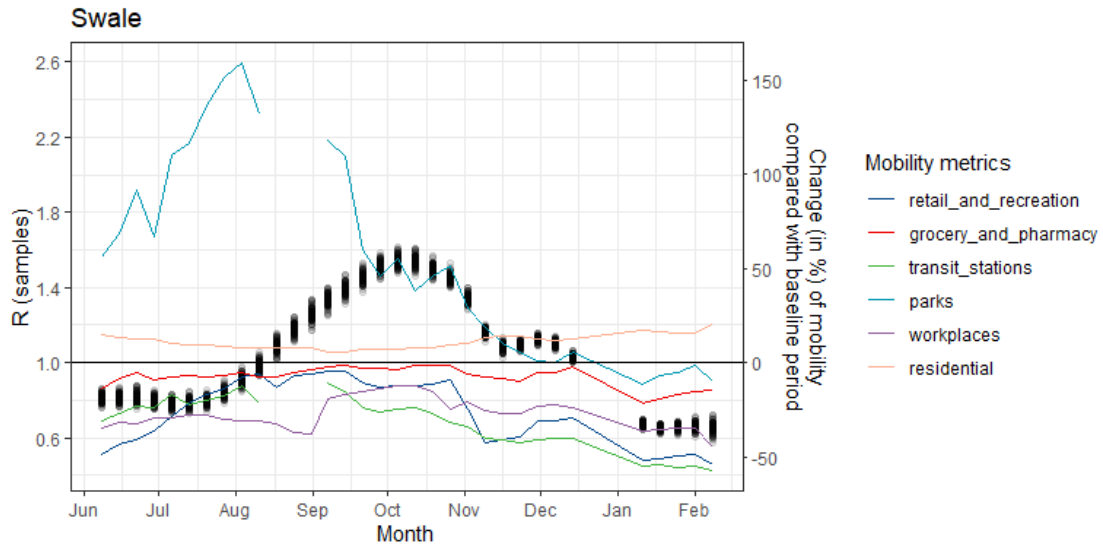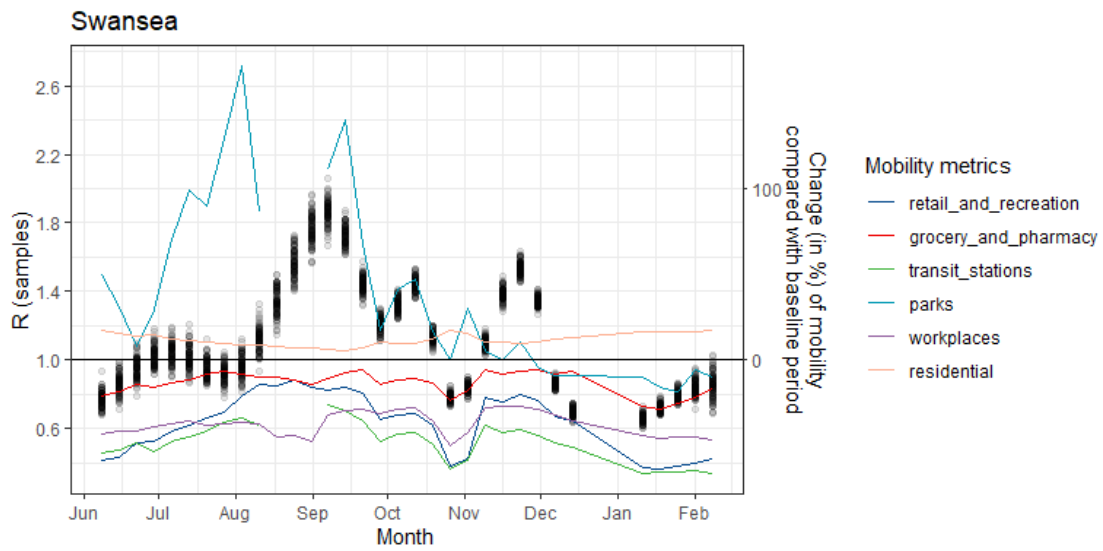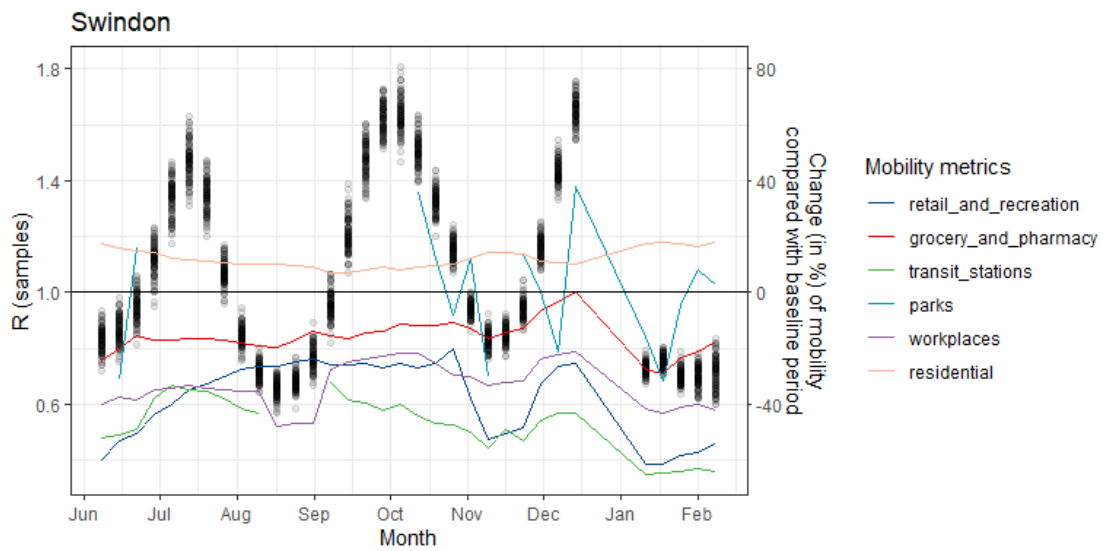

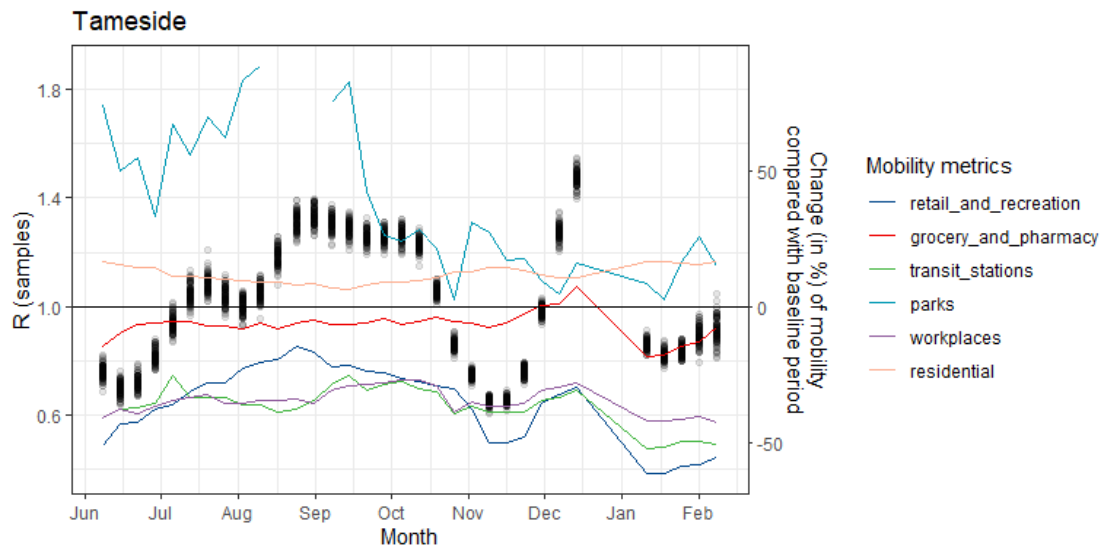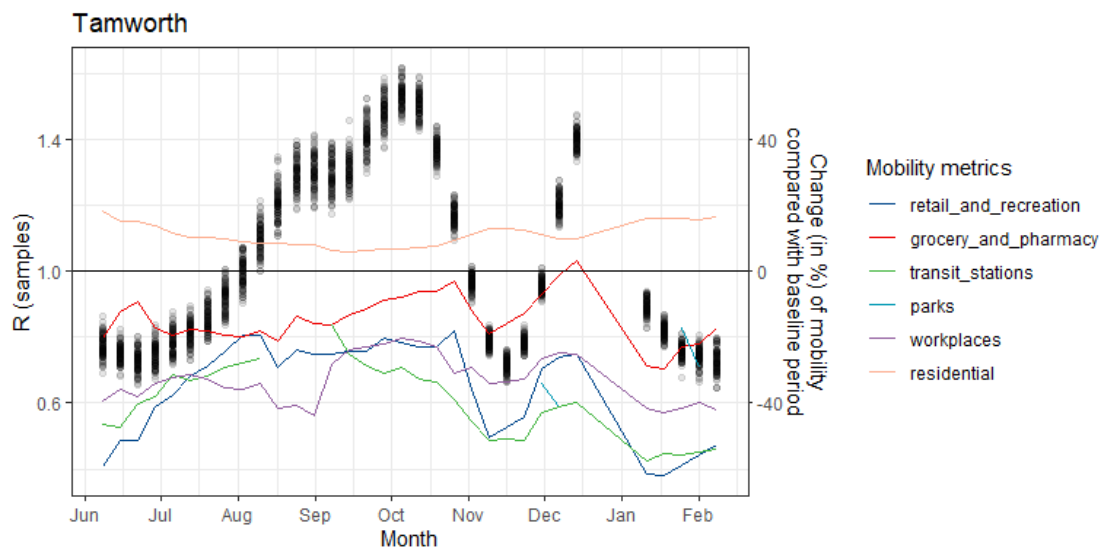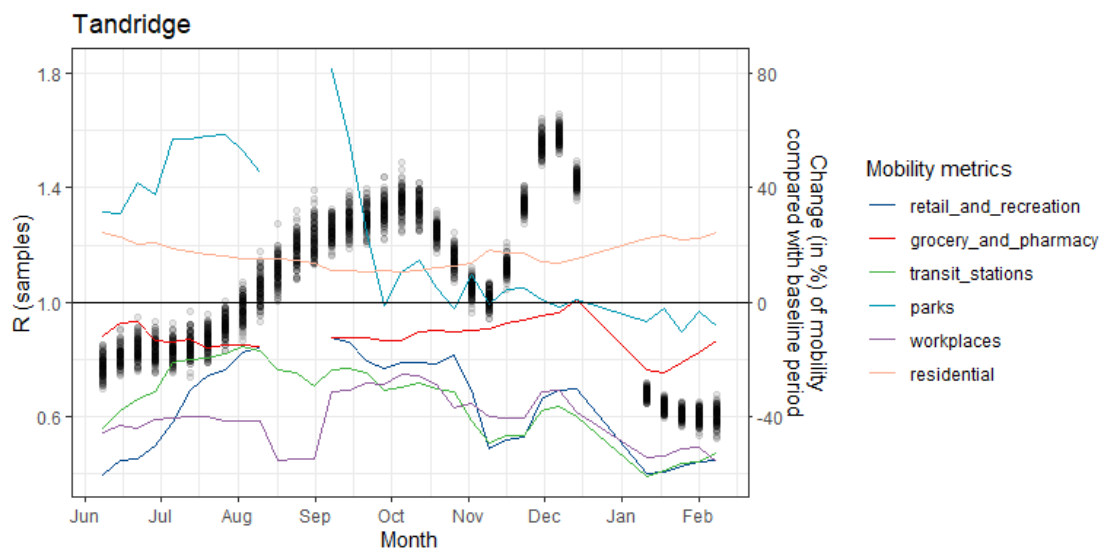

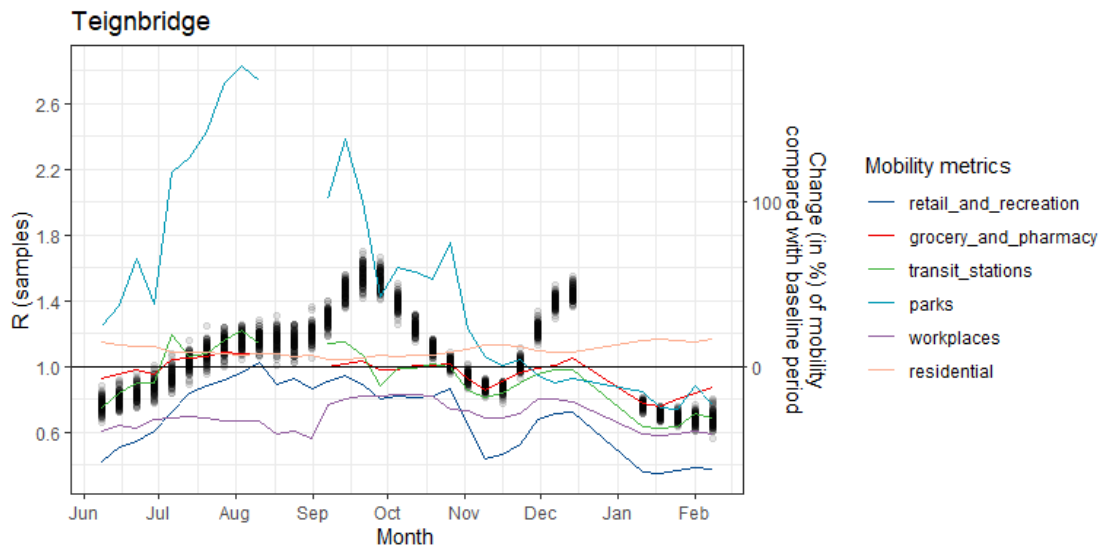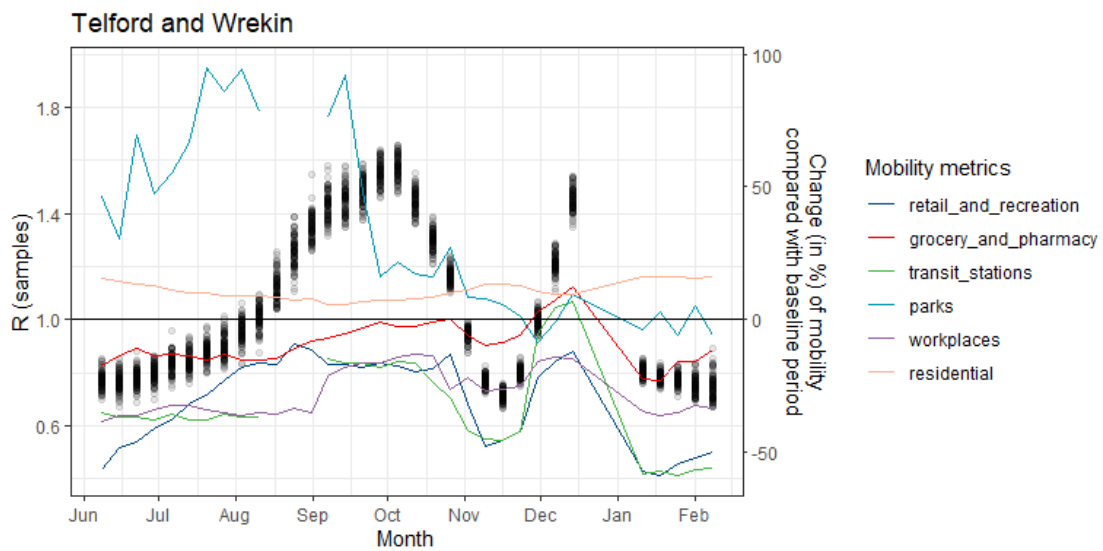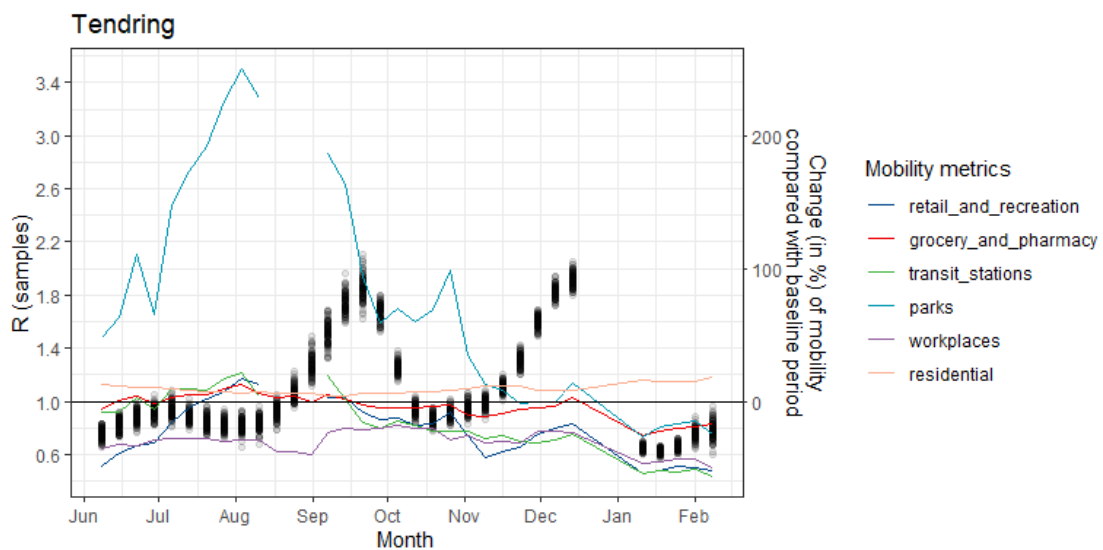

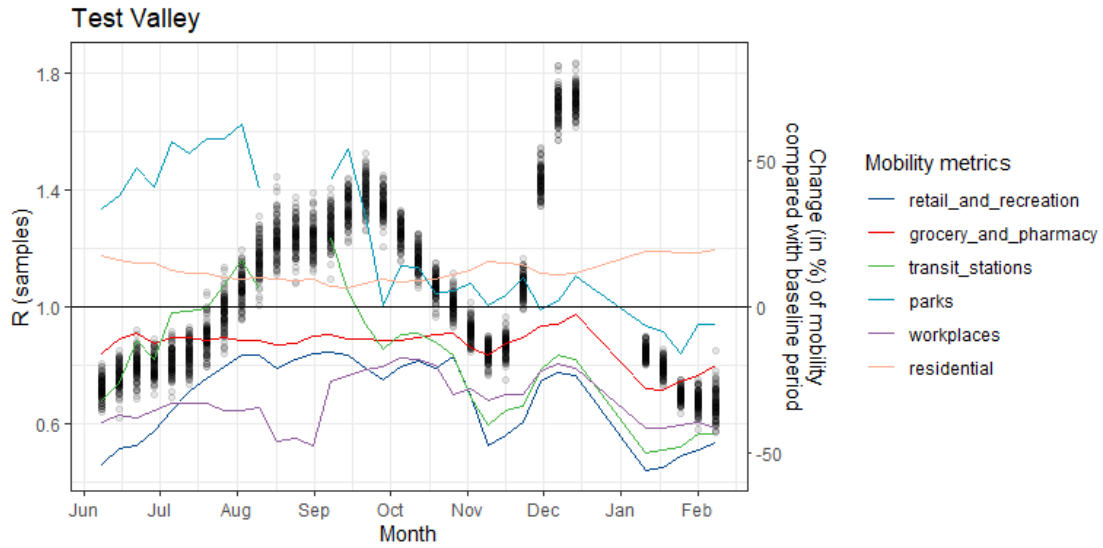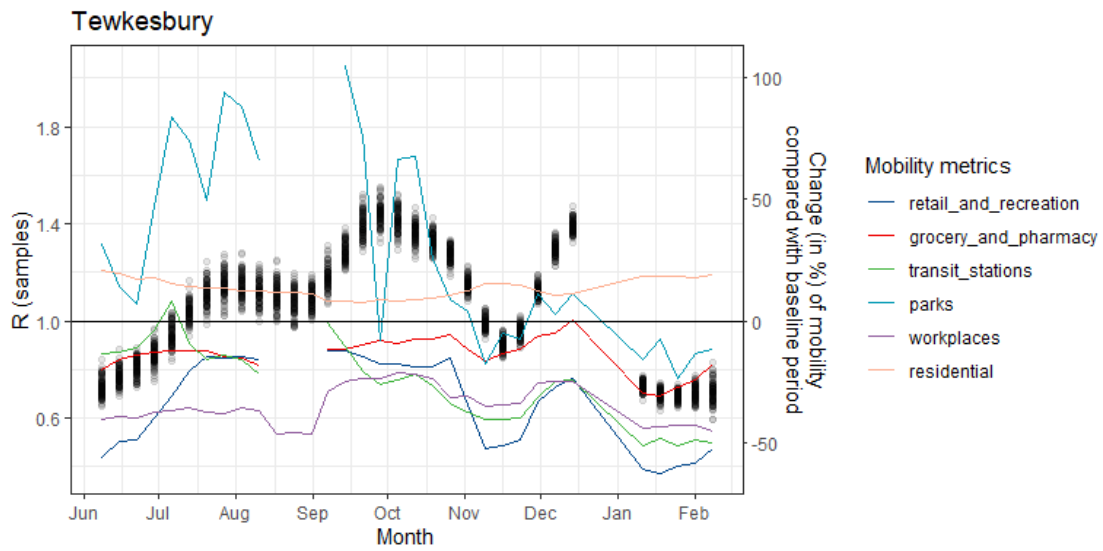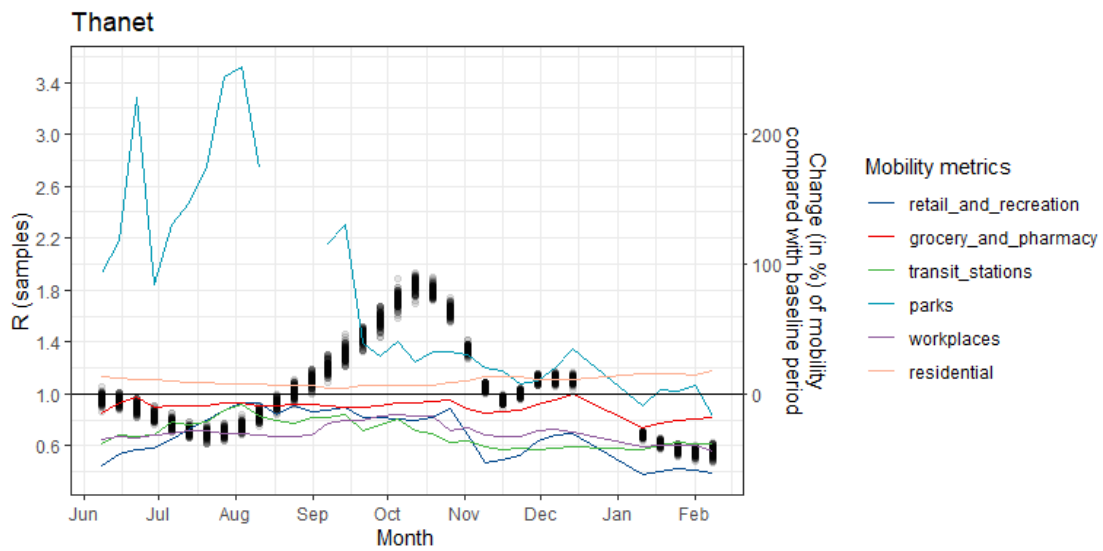

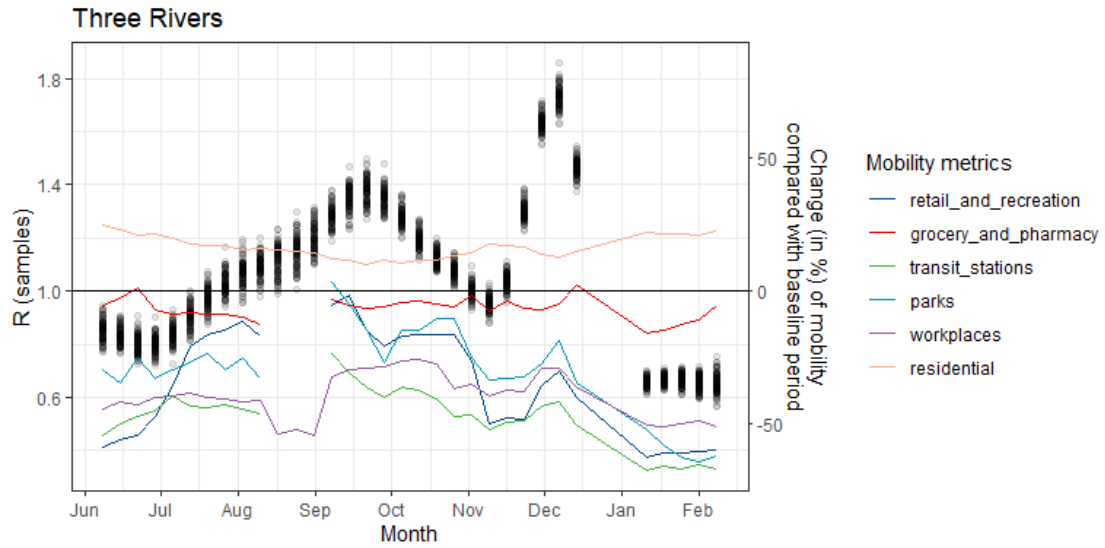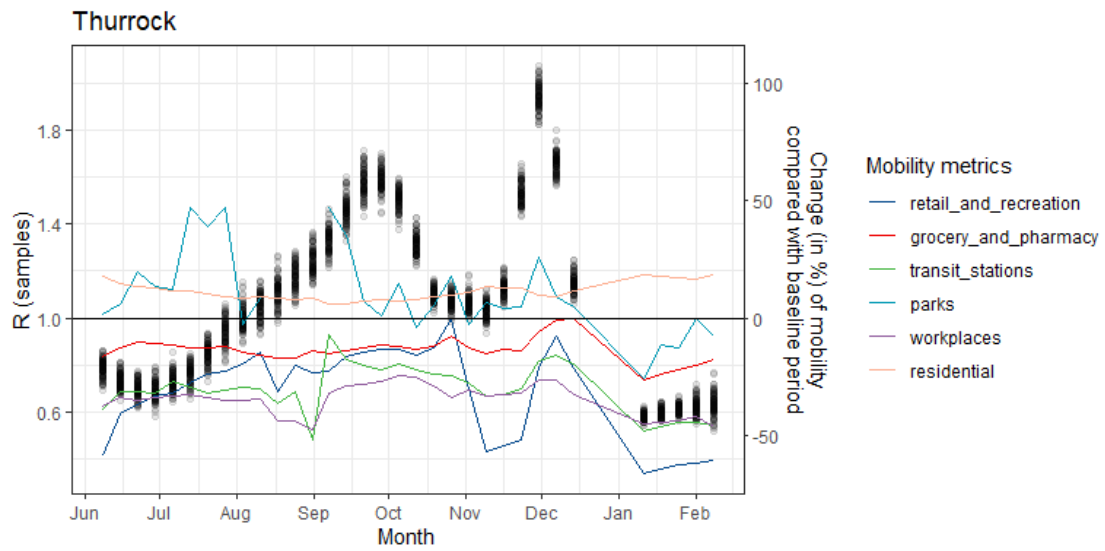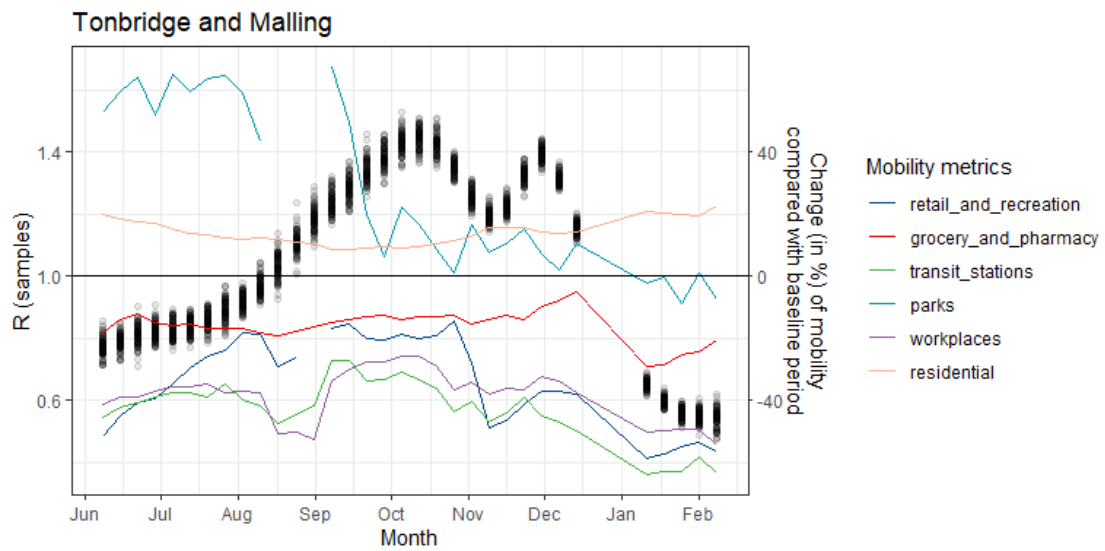

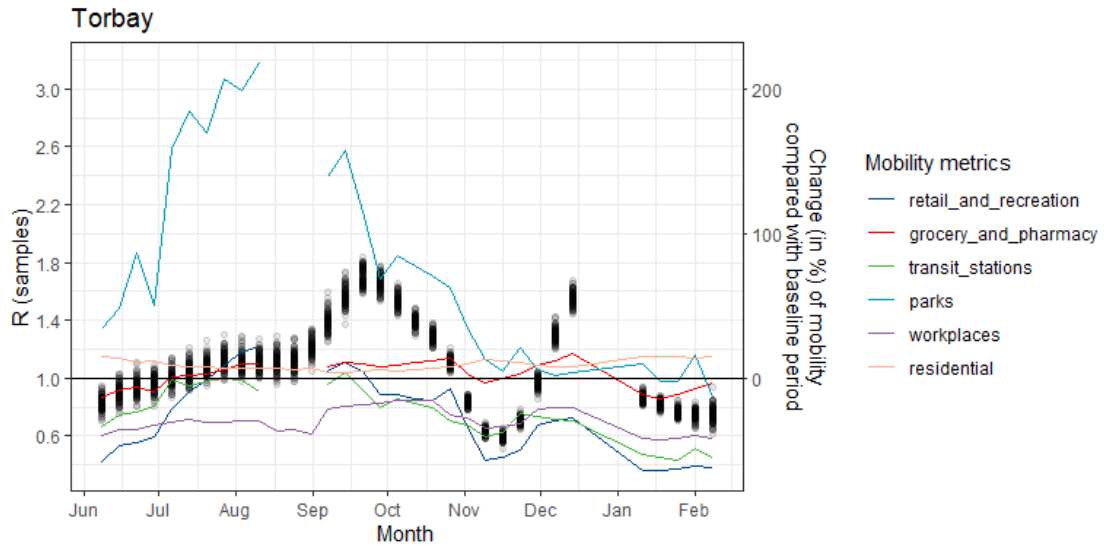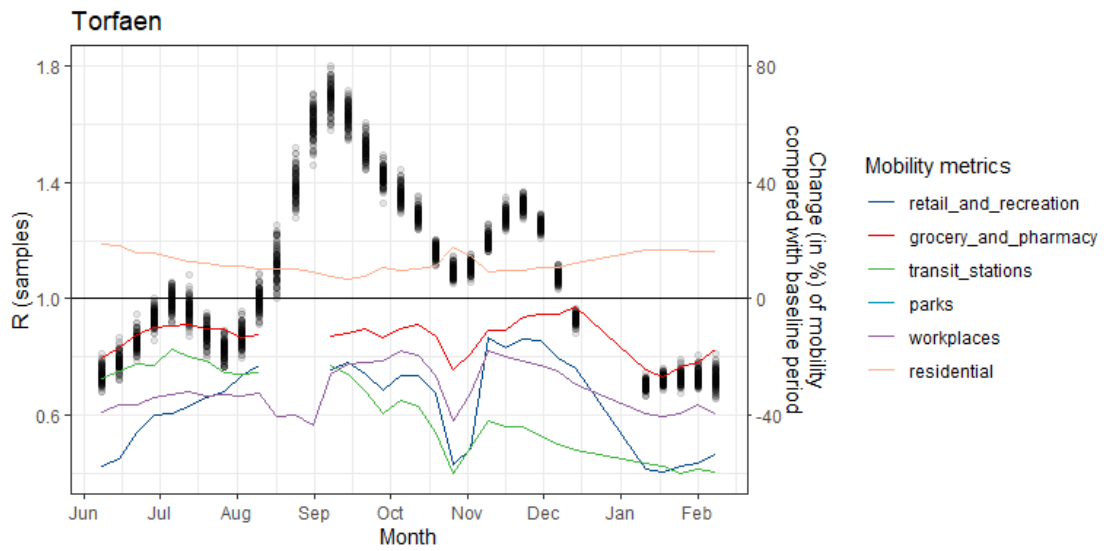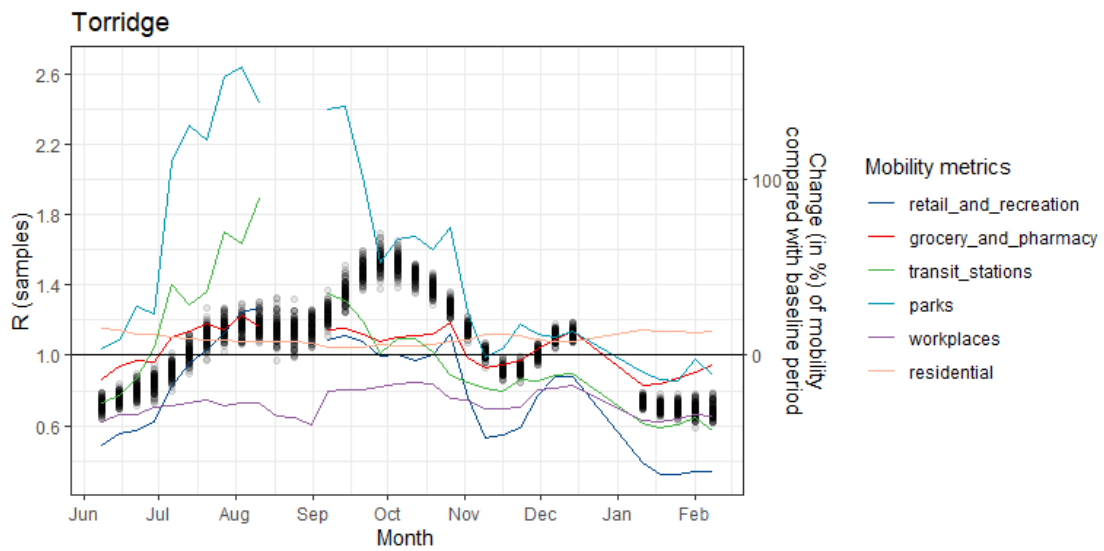

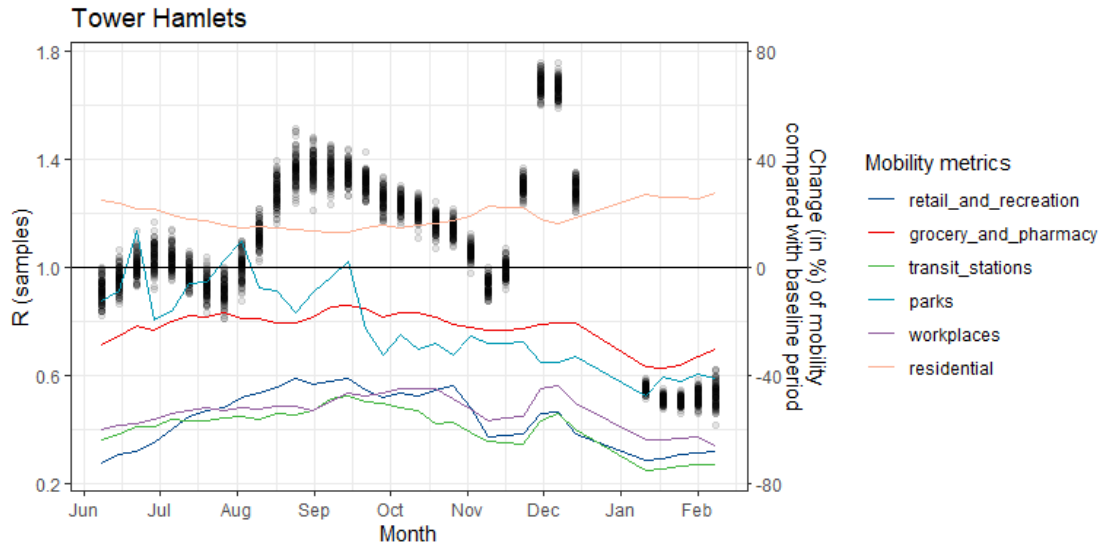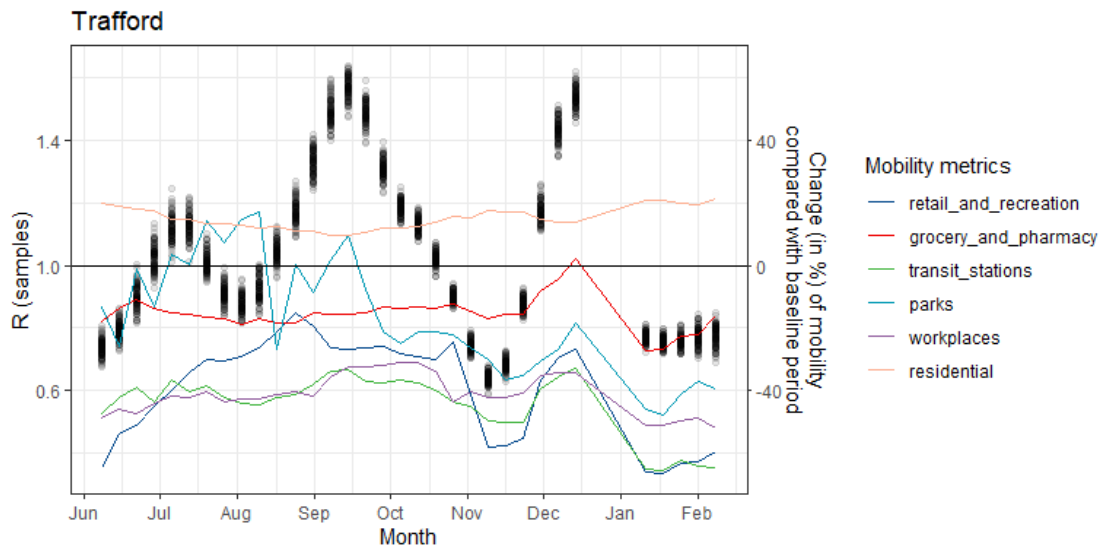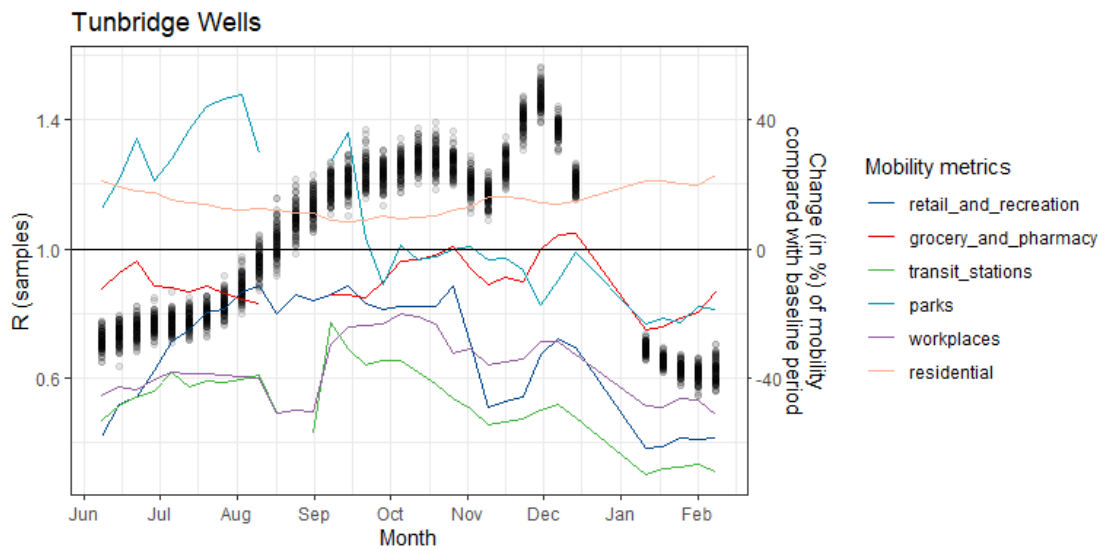

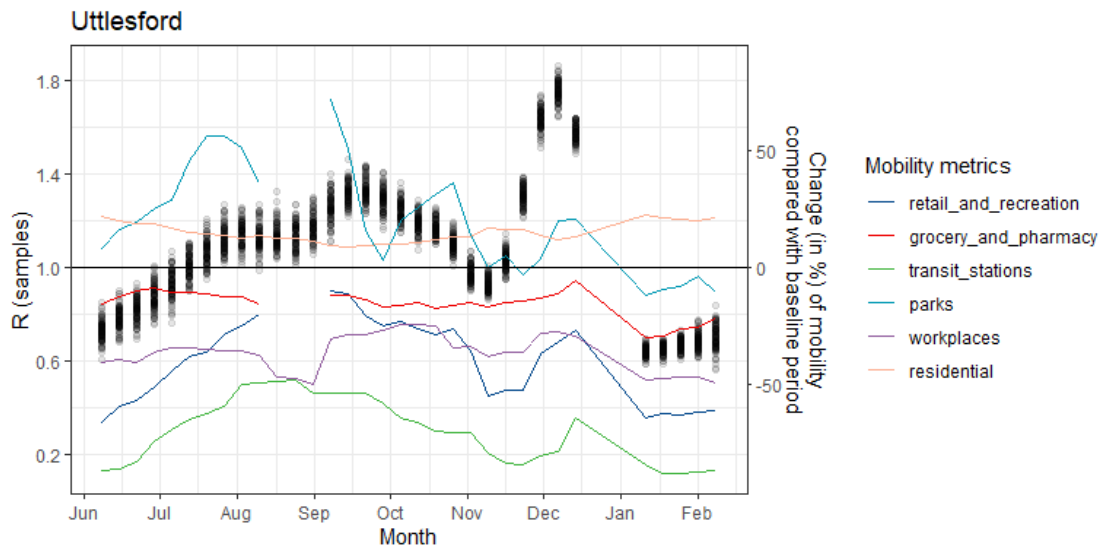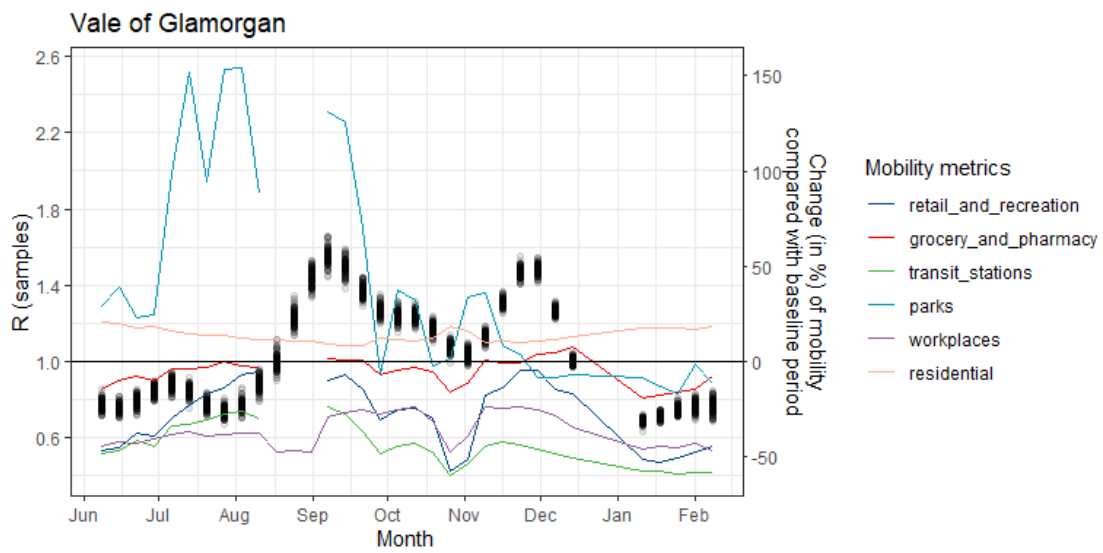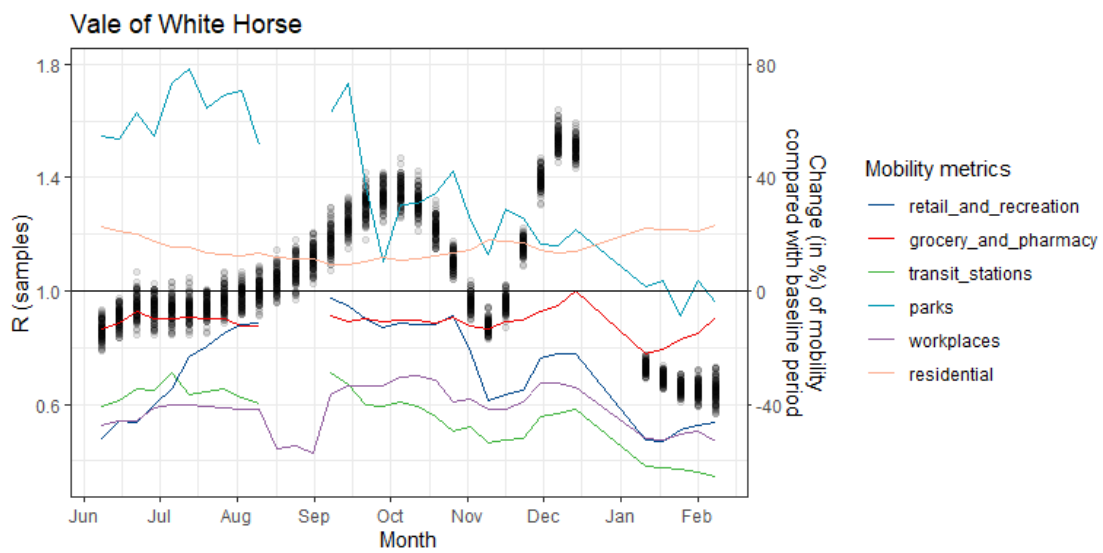



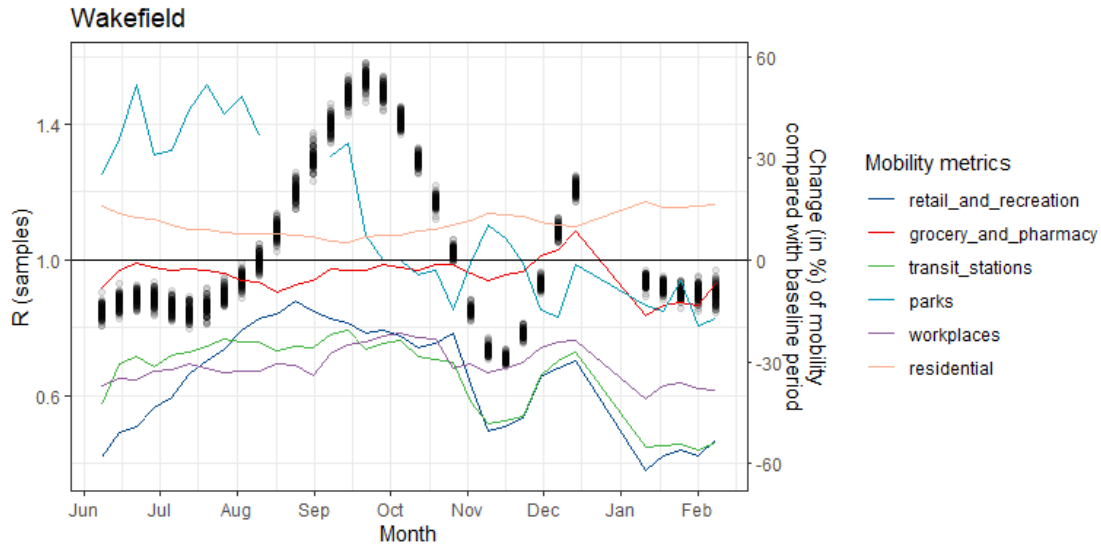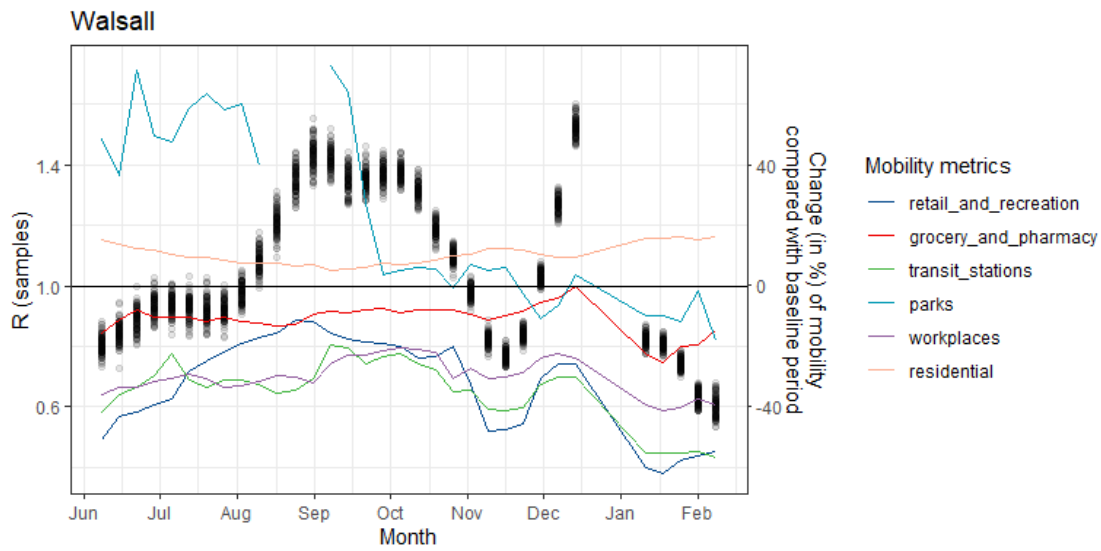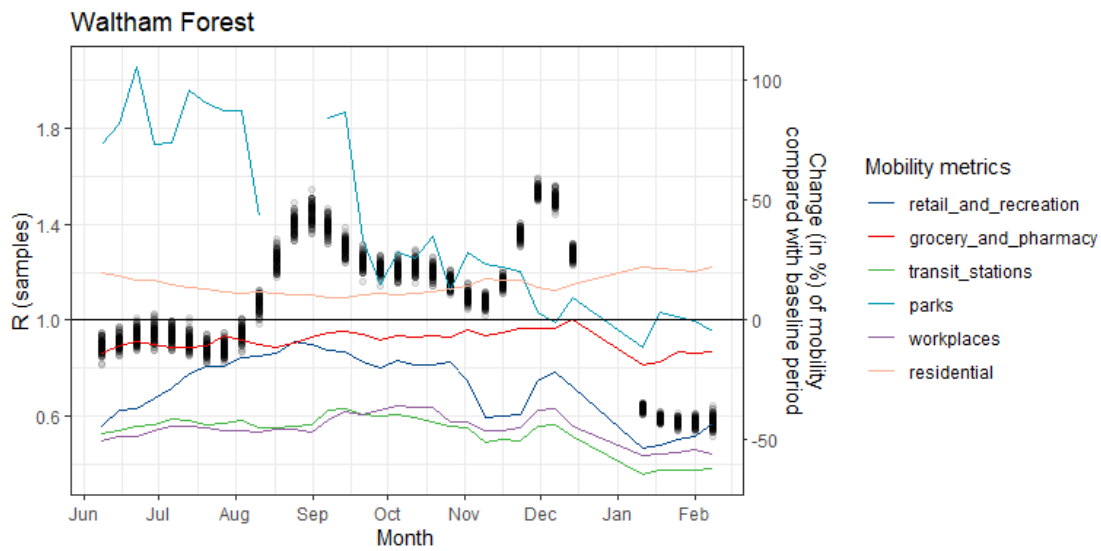

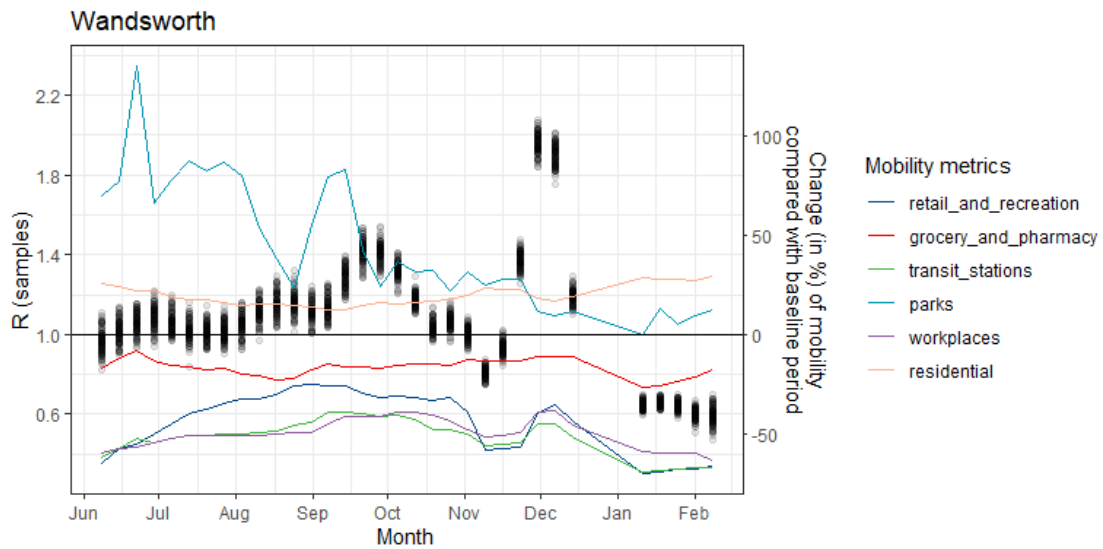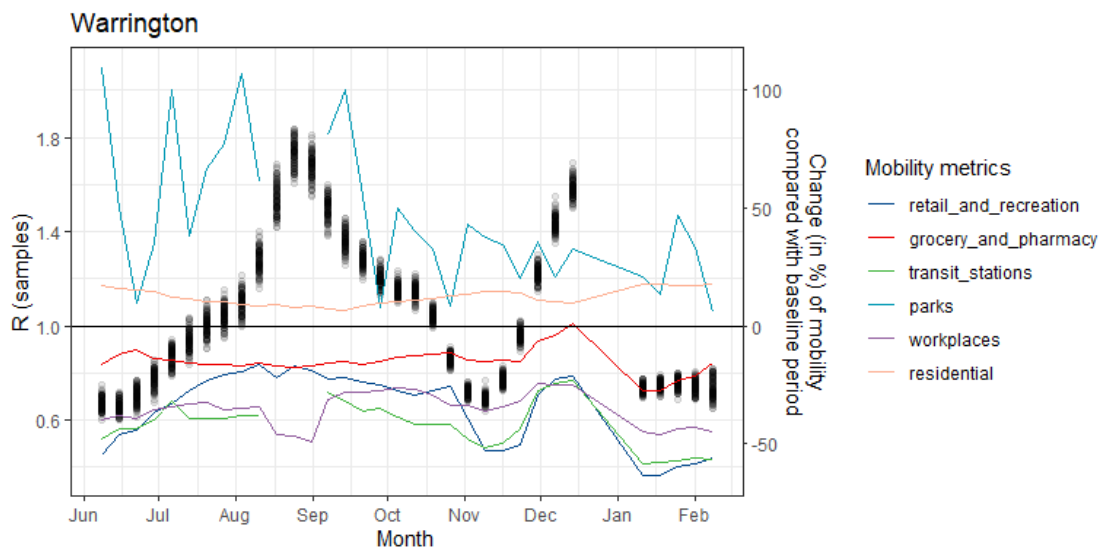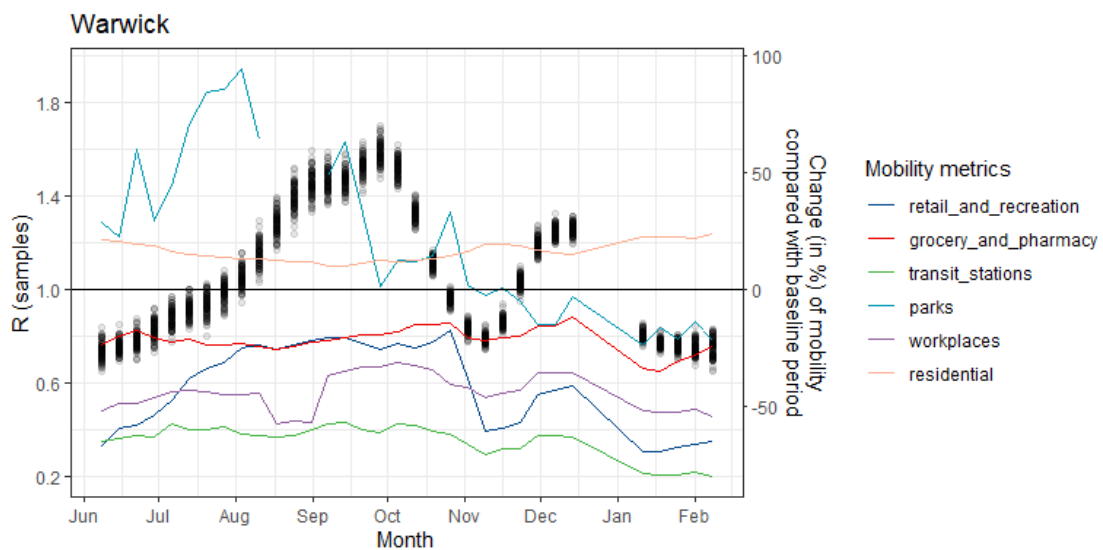

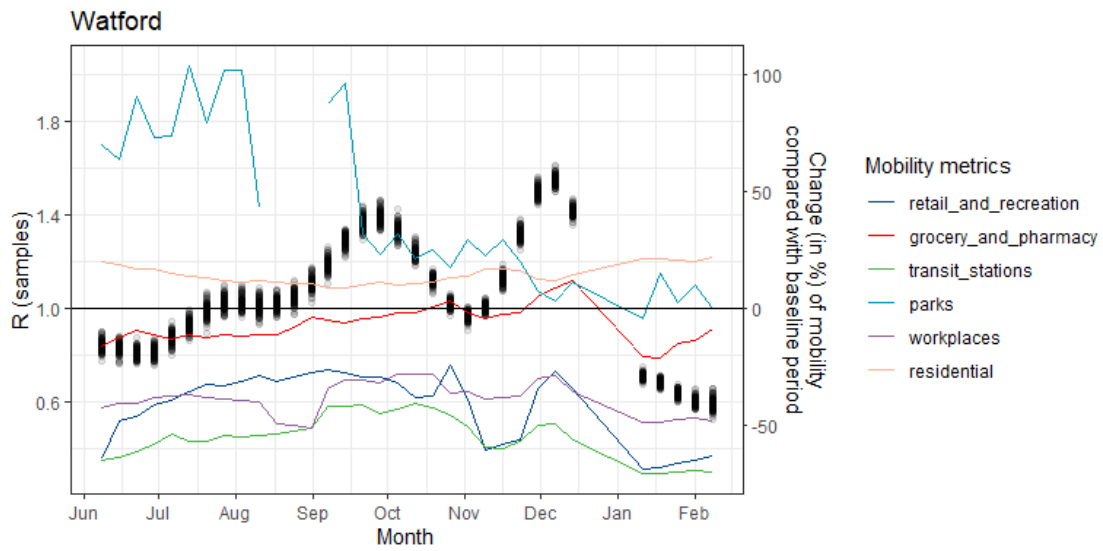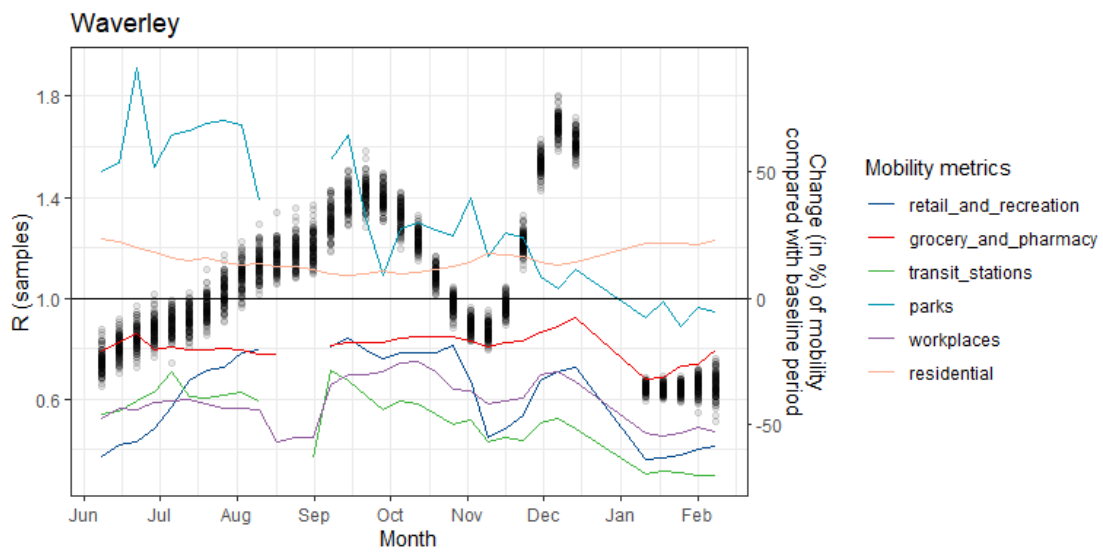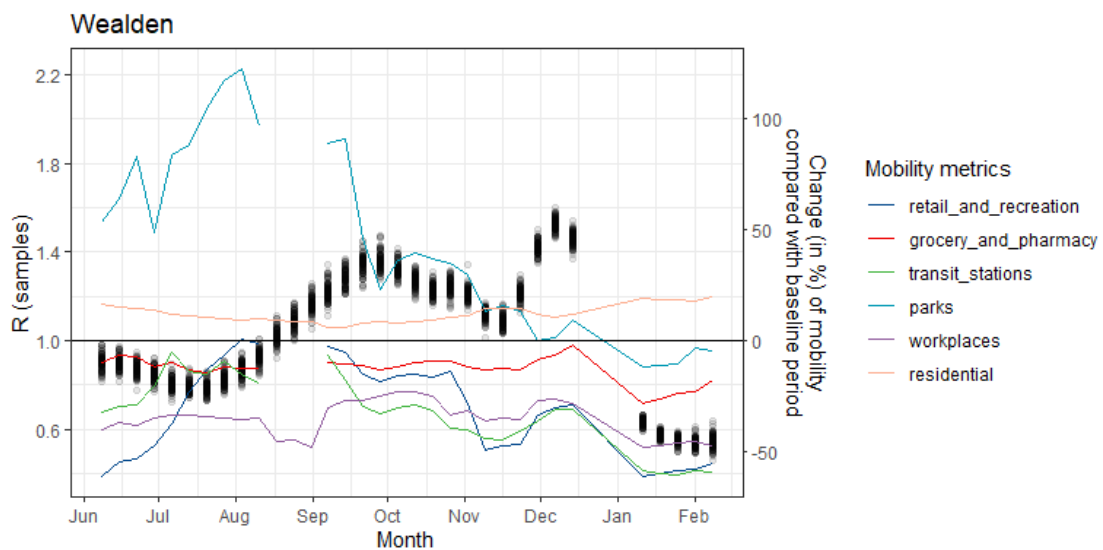

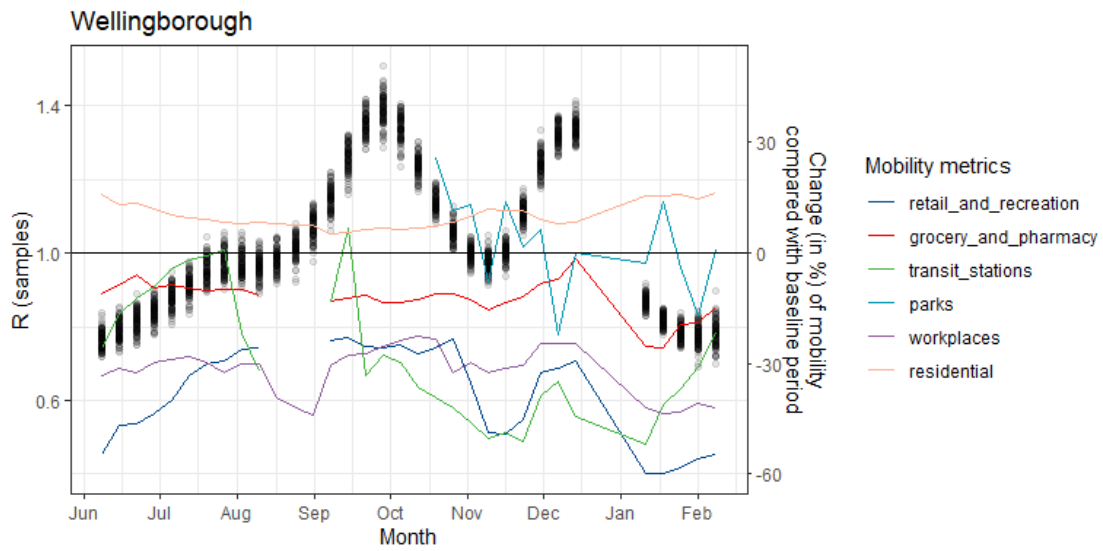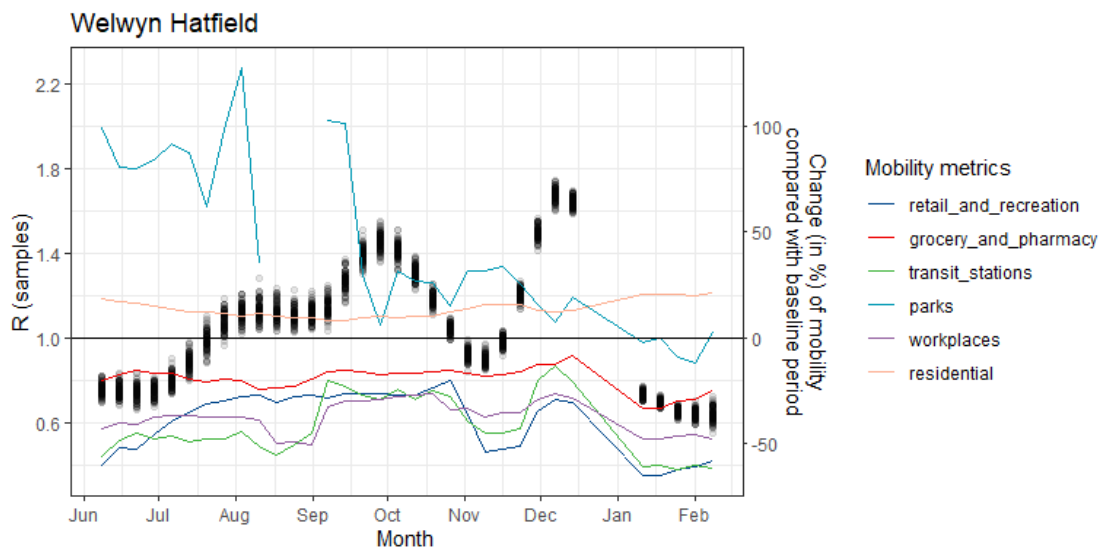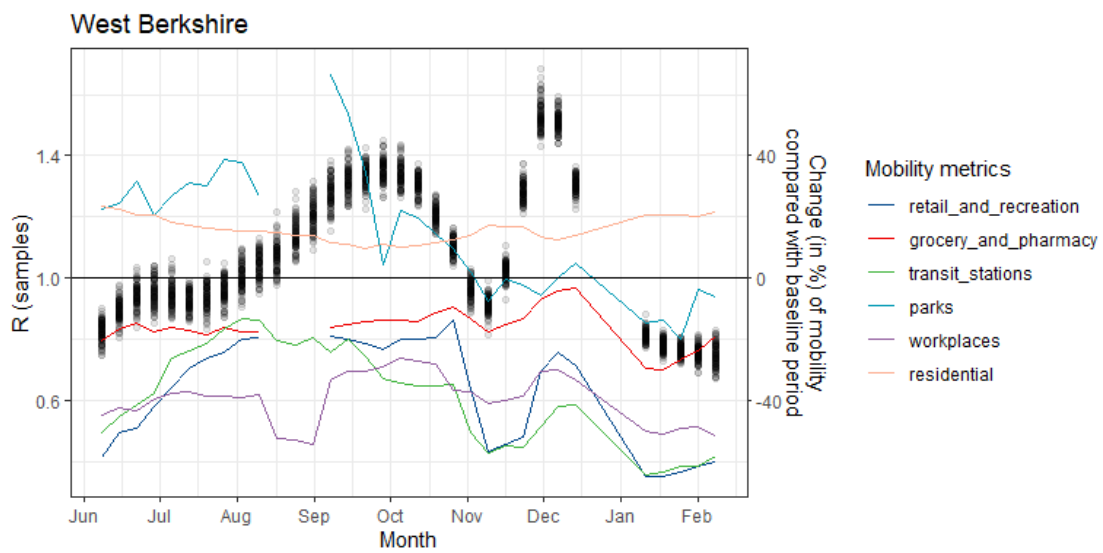

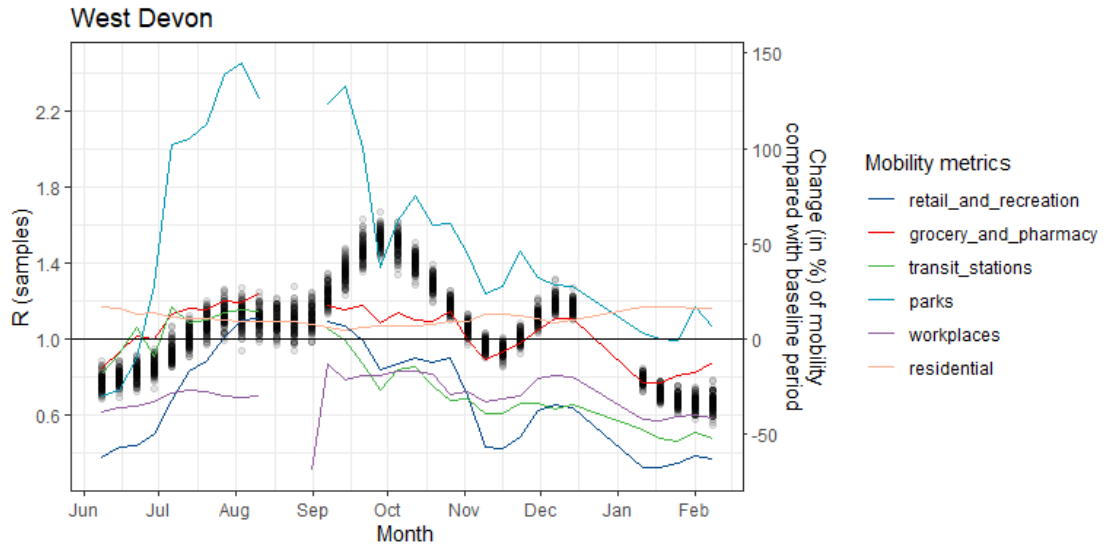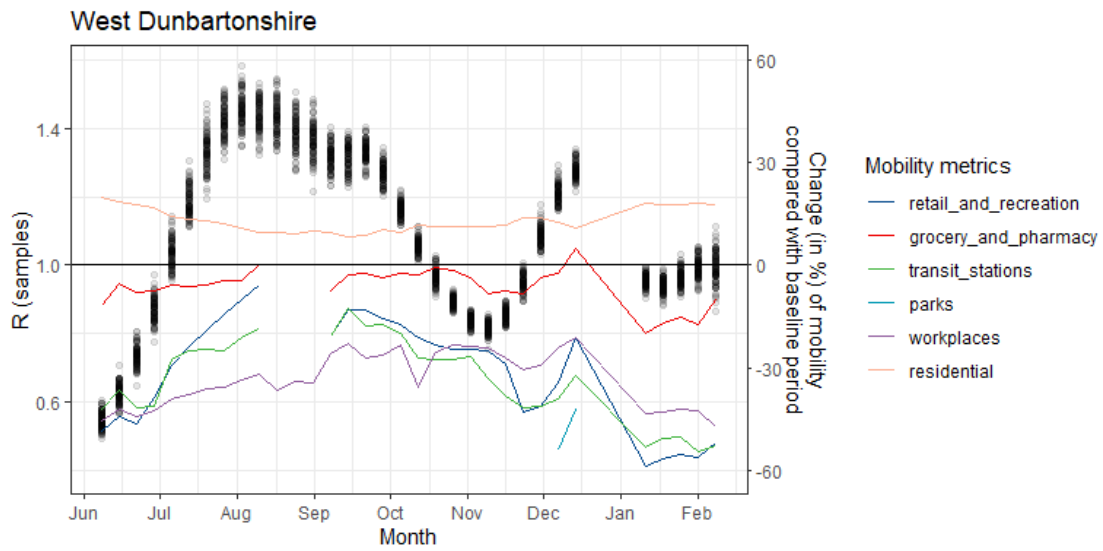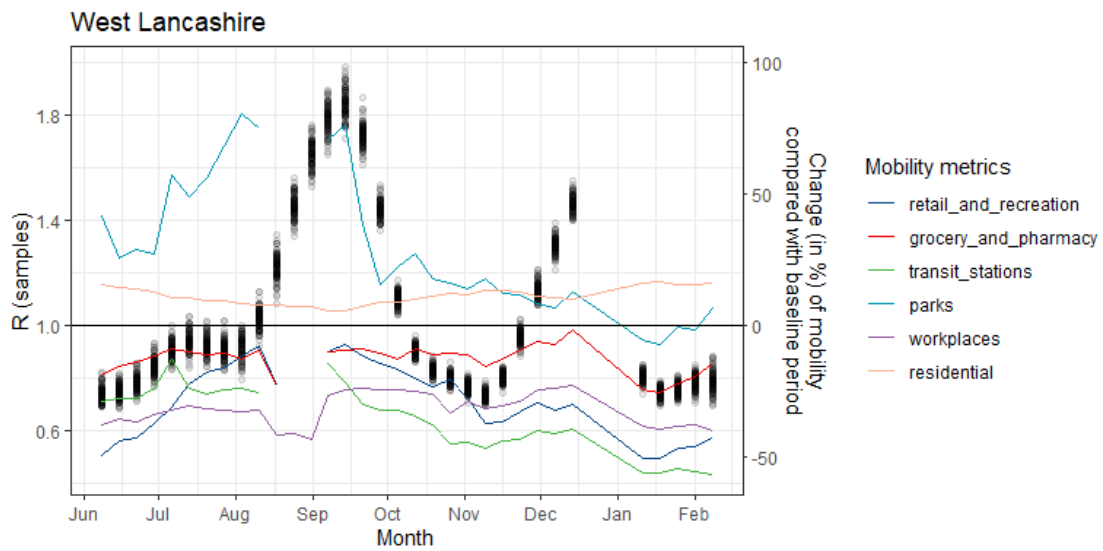

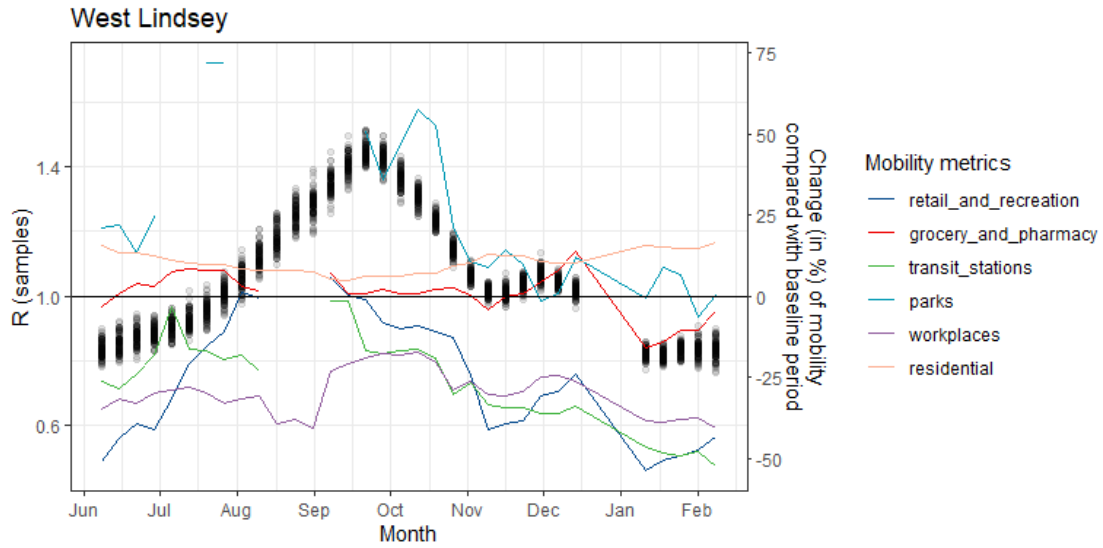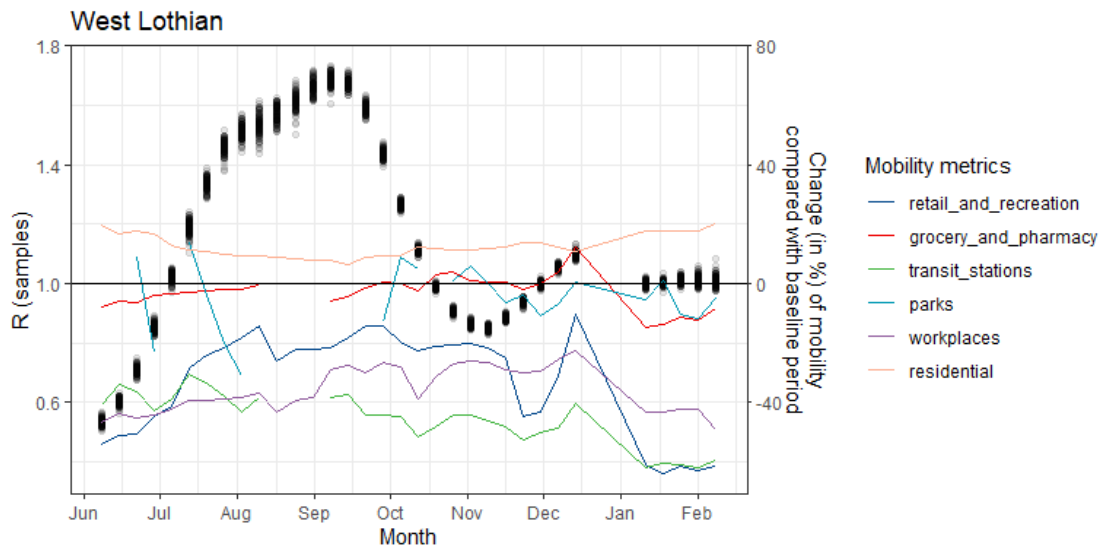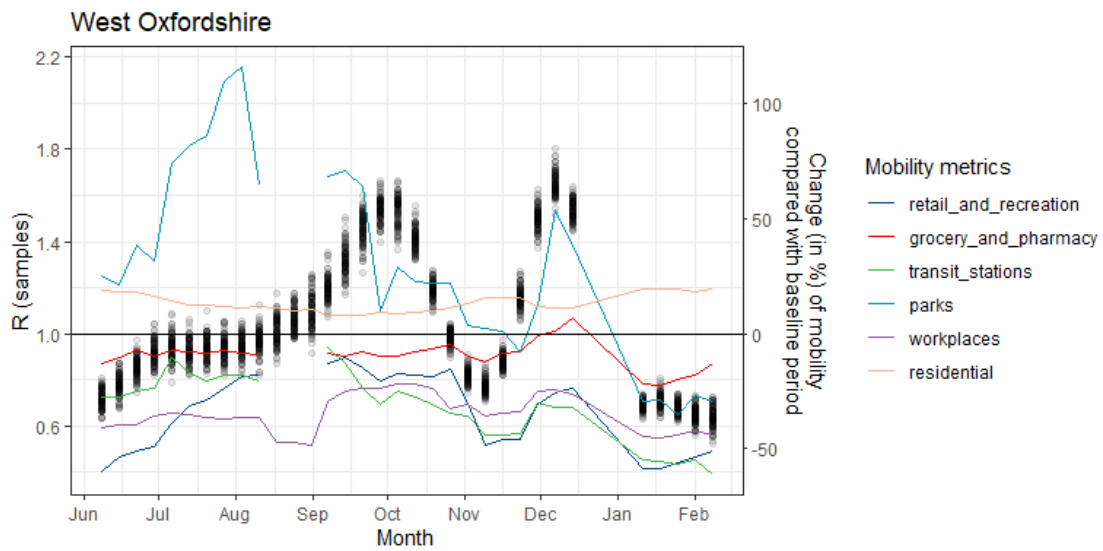

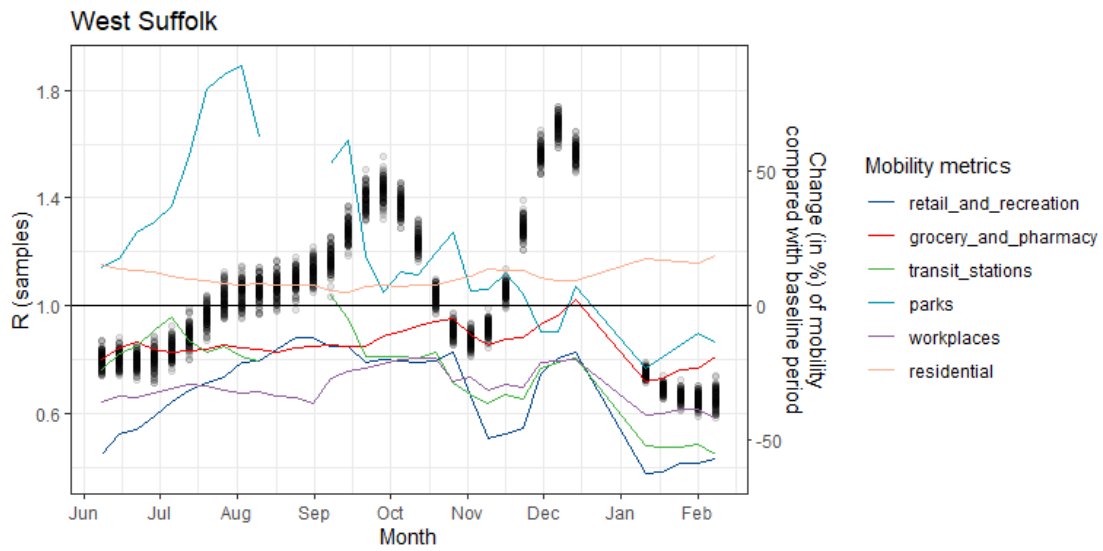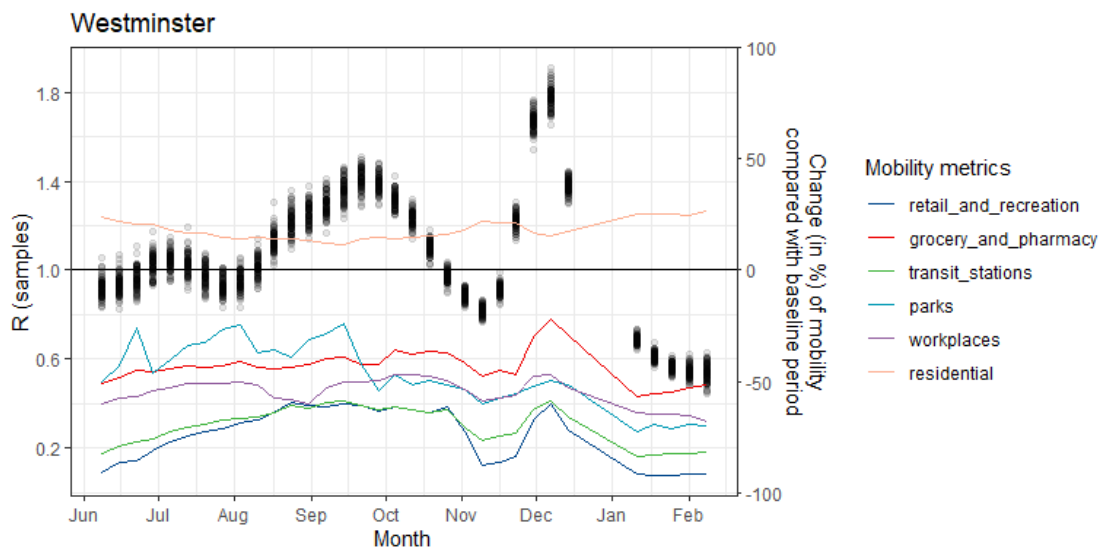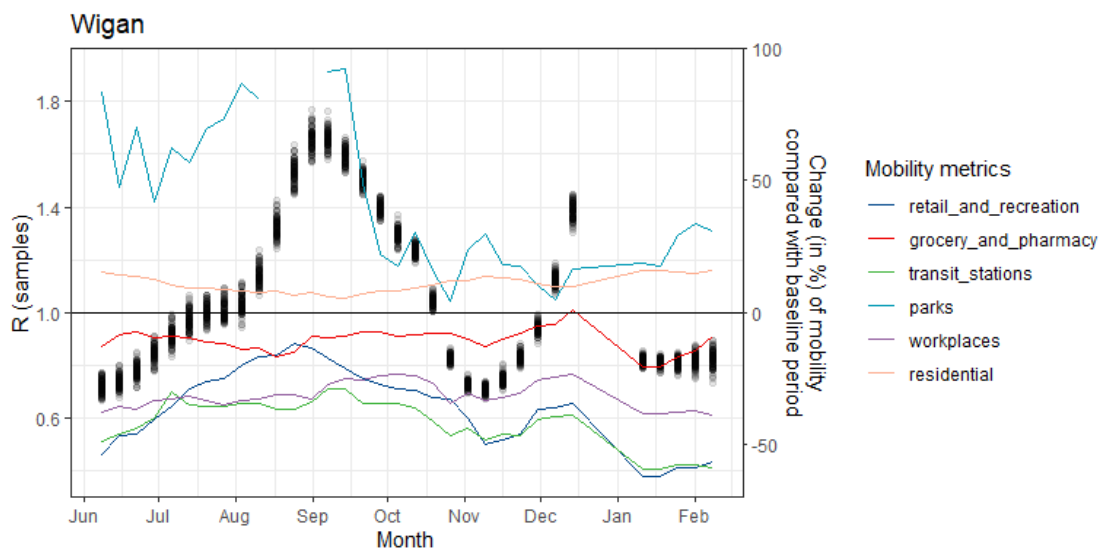

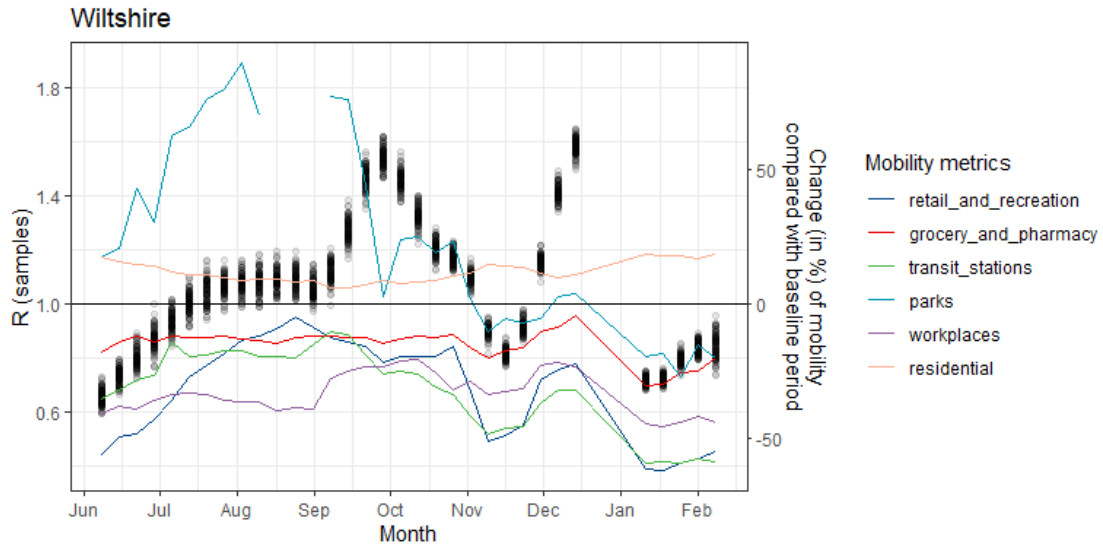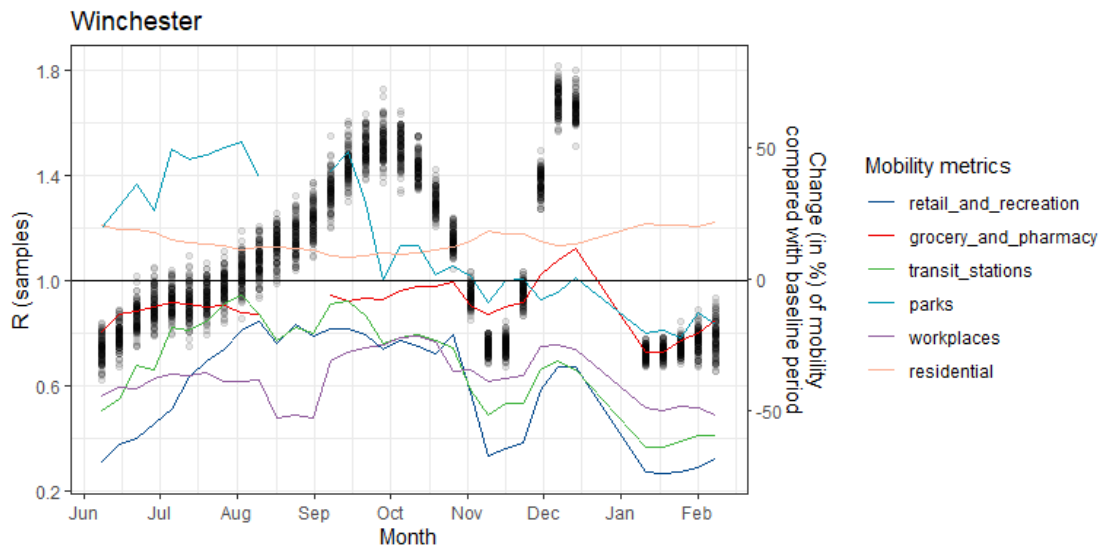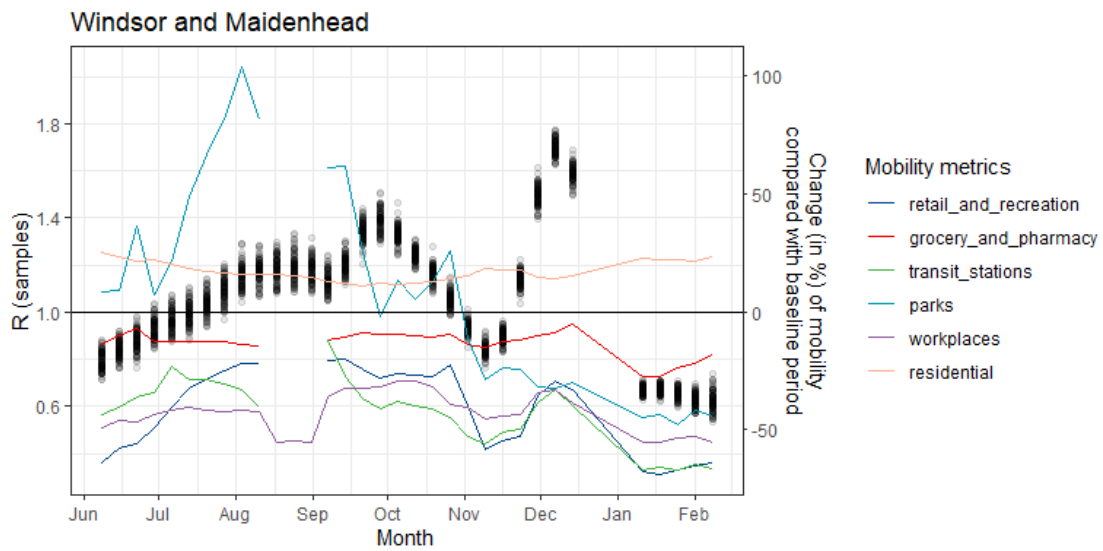



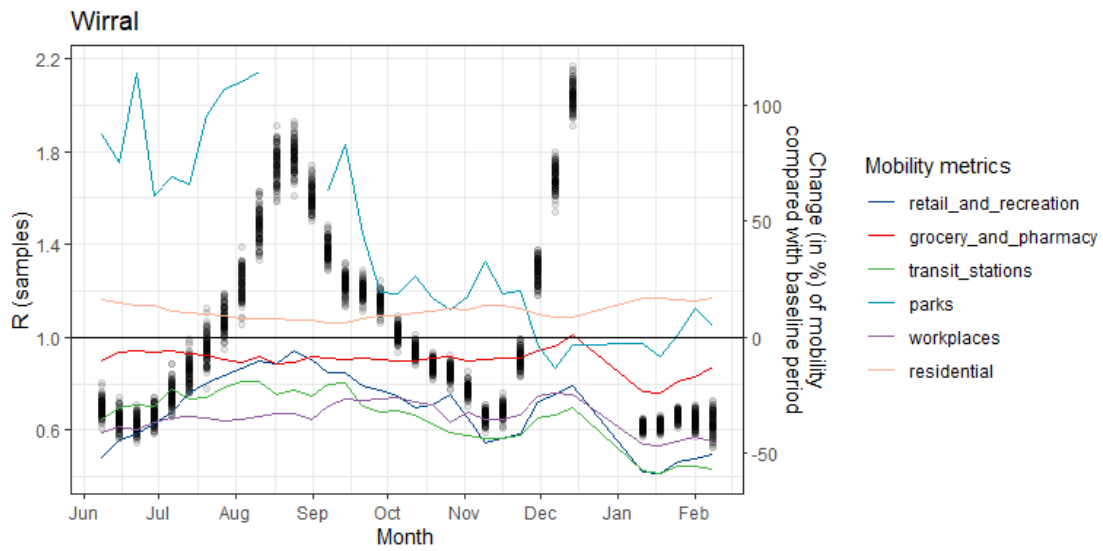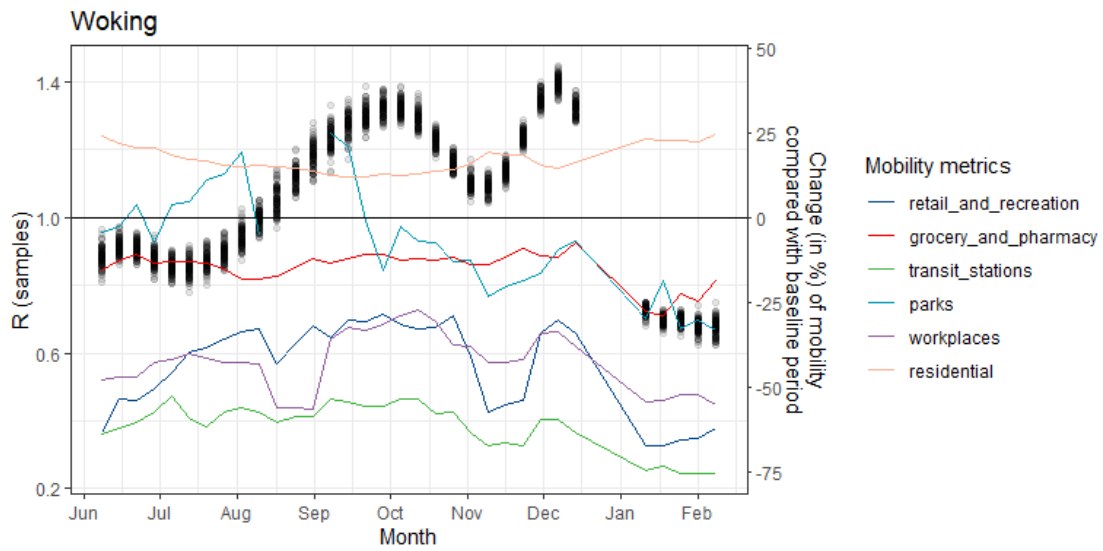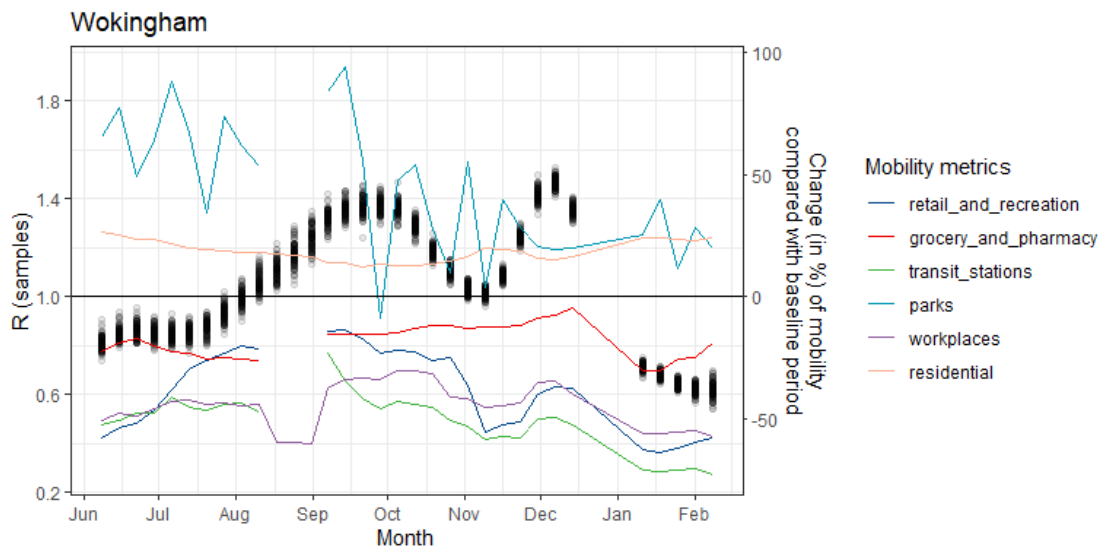

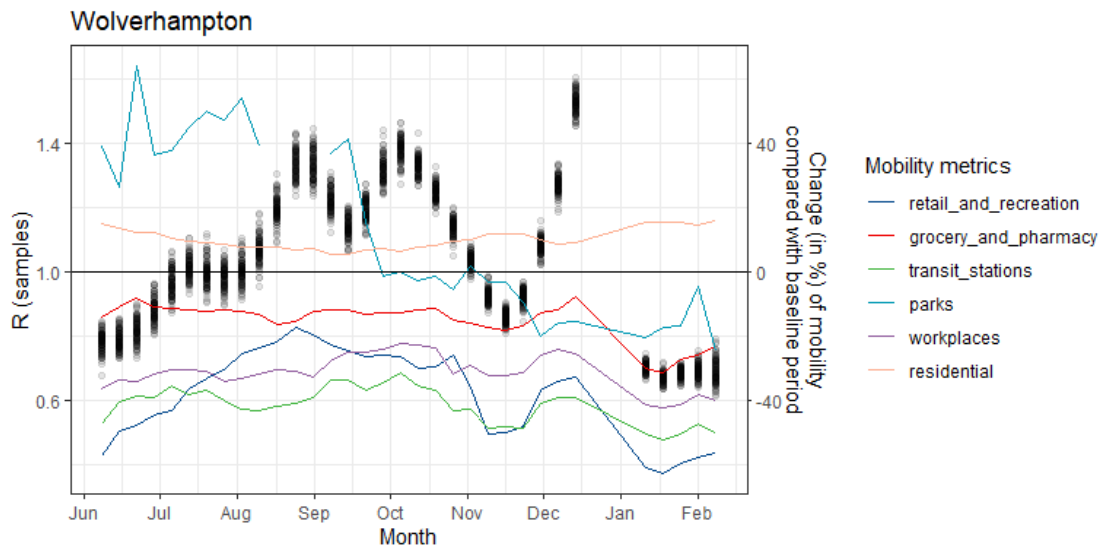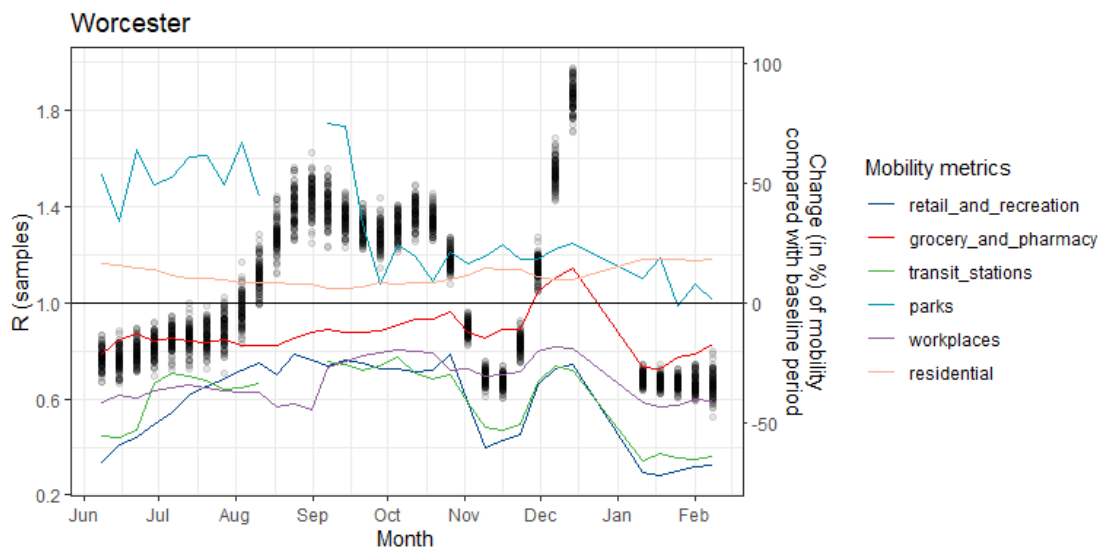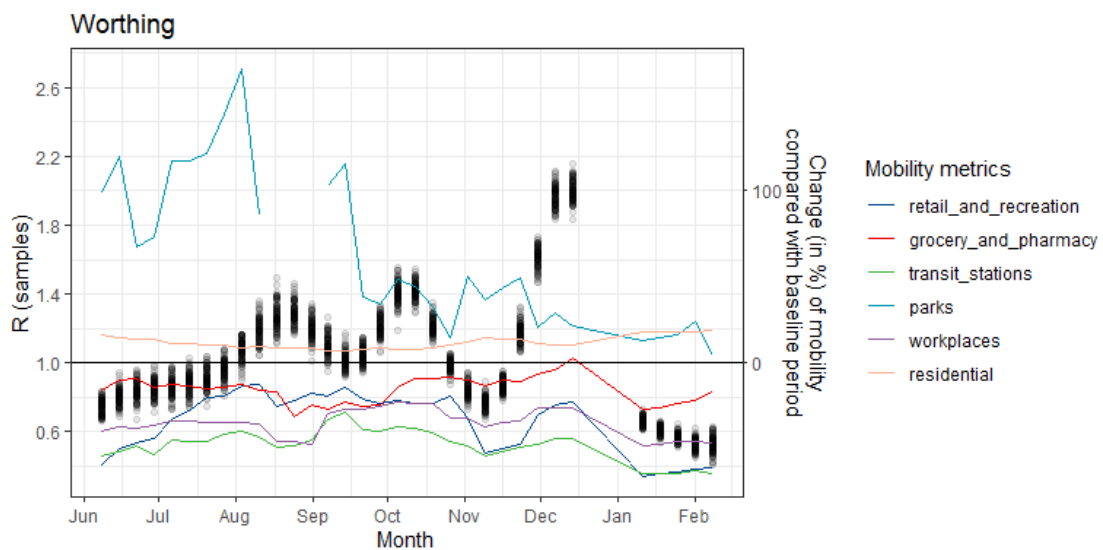

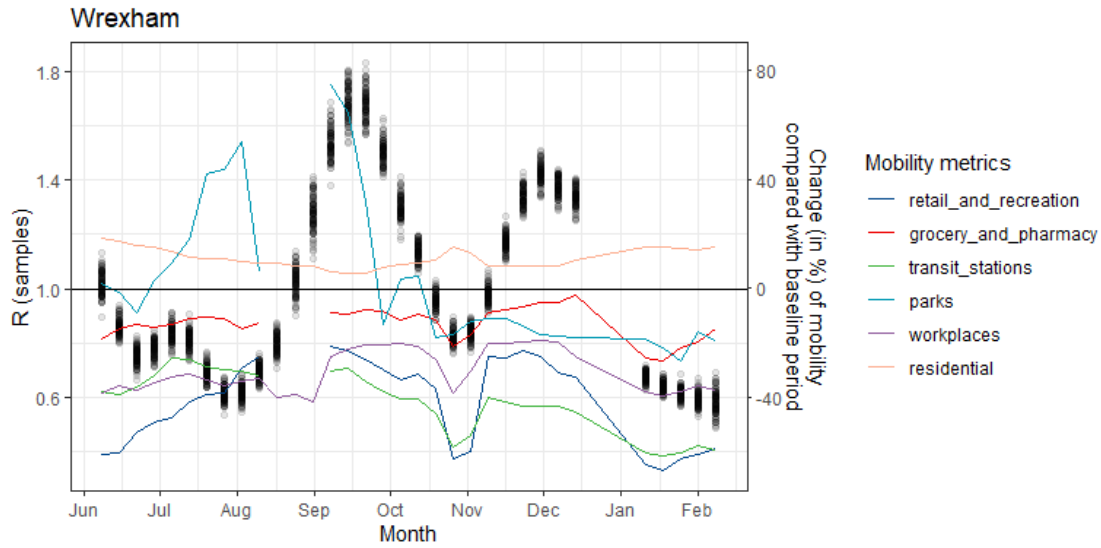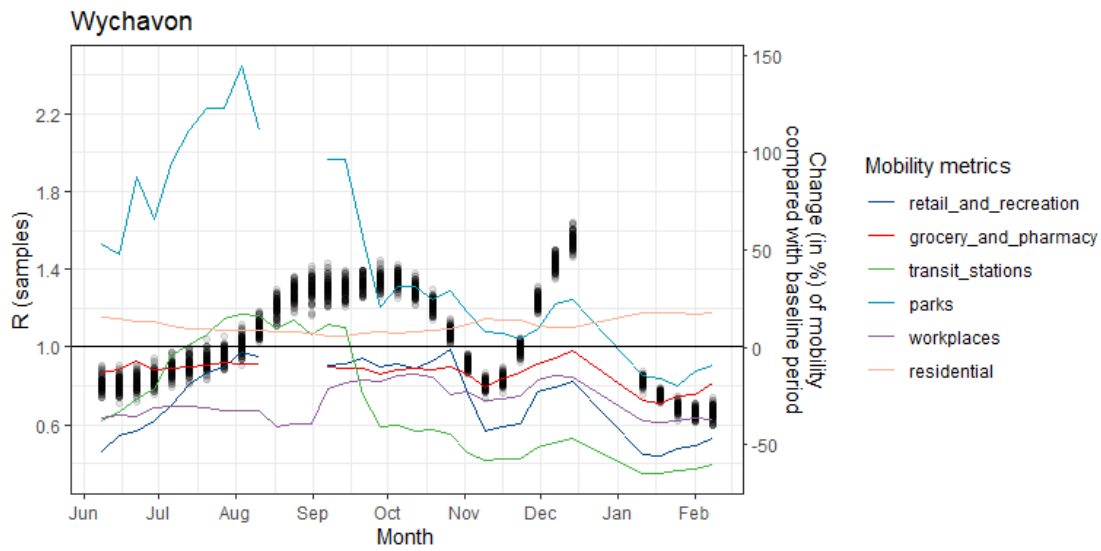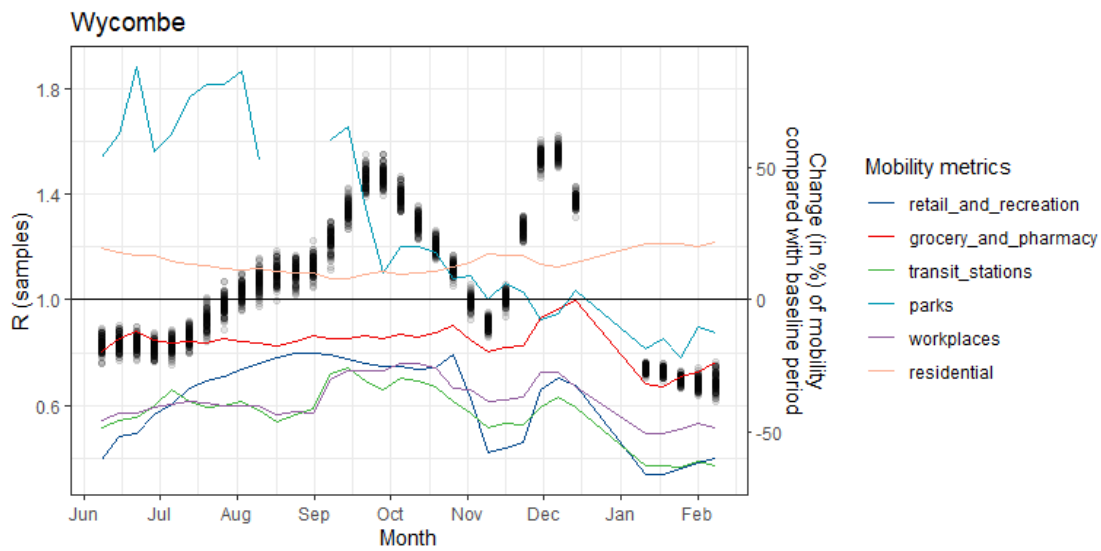

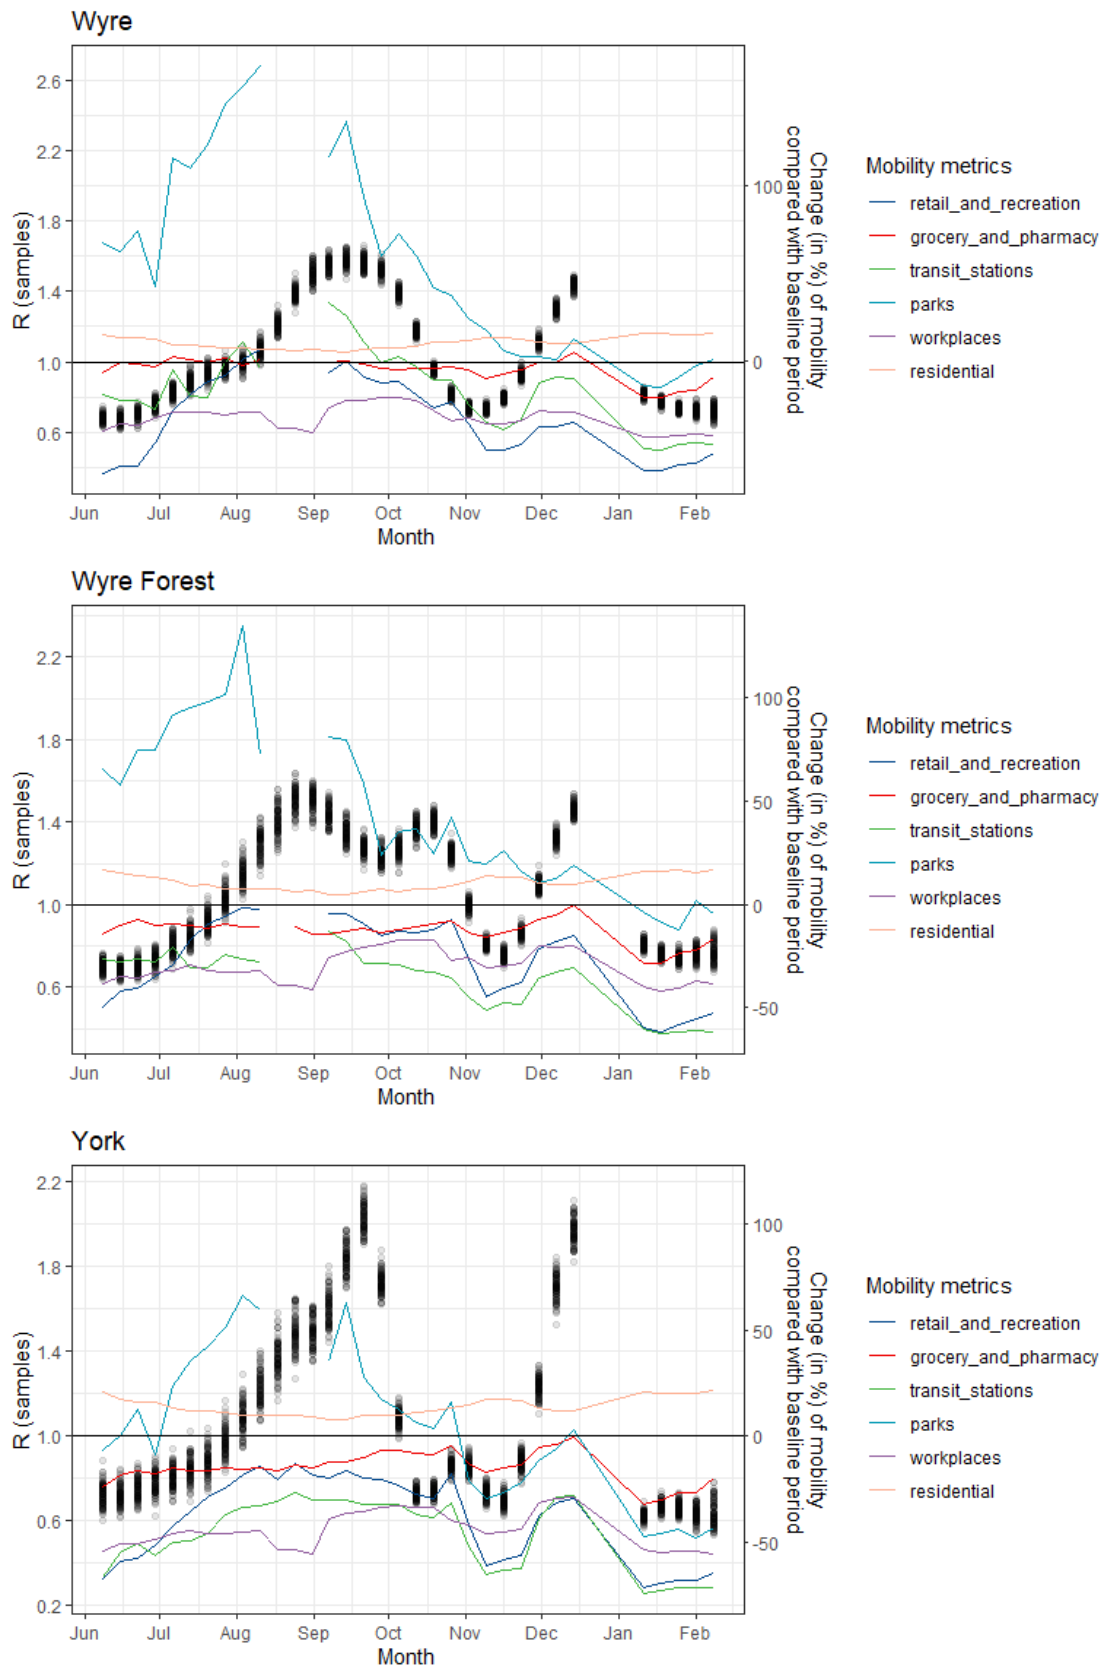

Black dots denote sampled  $R$ ;  $R$  was sampled 100 times based on the 30%, 60% and 90% credible intervals of the model posteriors as detailed in **Text S1**.

**Figure S2. Comparisons of findings from the main and sensitivity analyses**

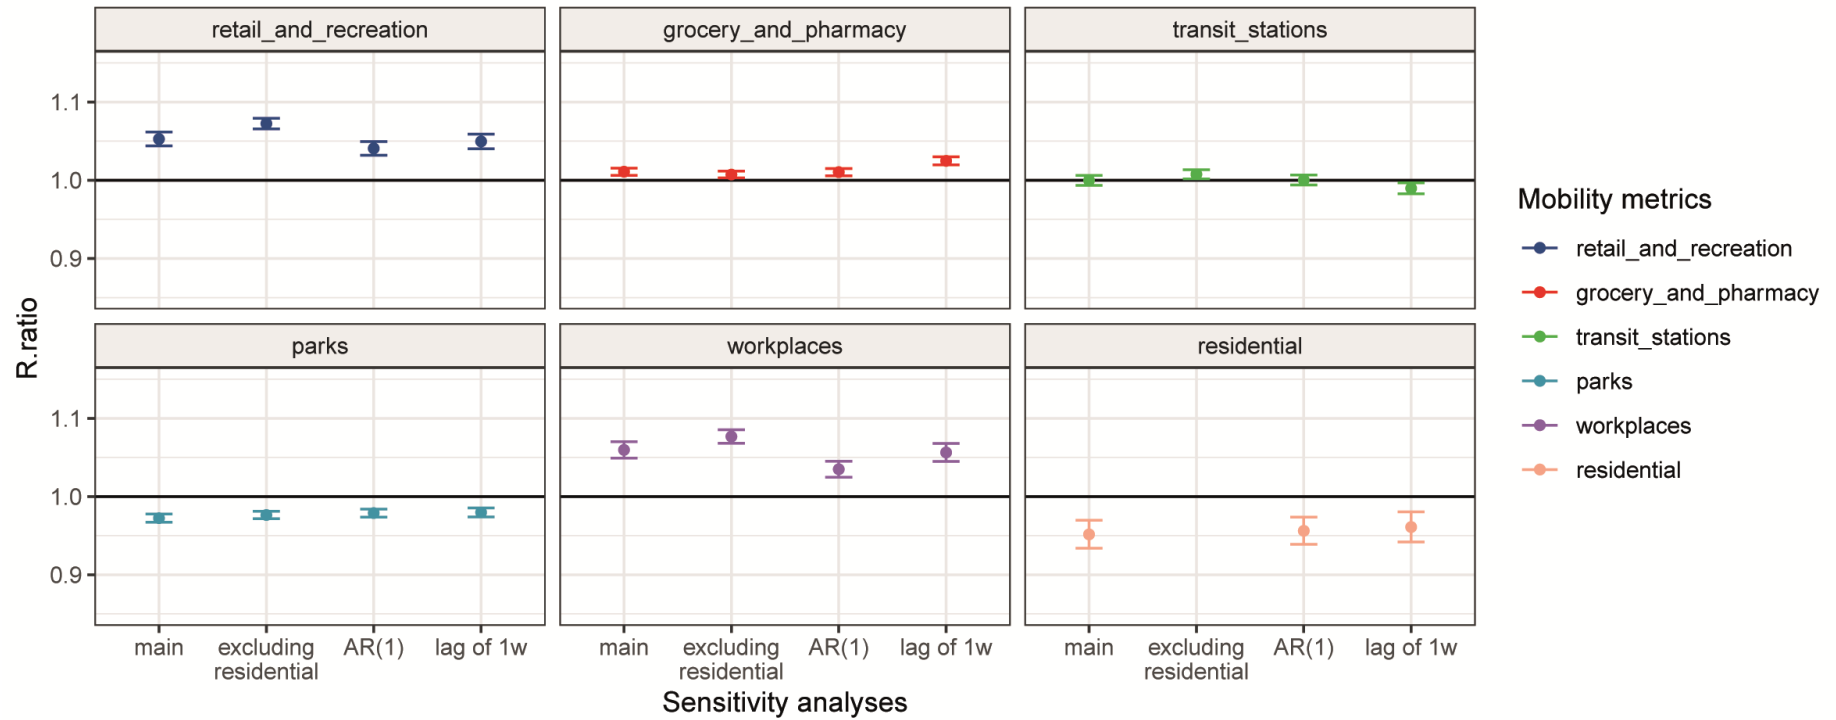

Main = the main model; excluding residential = the sensitivity analysis that excluded the mobility metric of residential stay from the main model; AR(1) = the sensitivity analysis that applied an autoregressive(1) error term; lag of 1w = the sensitivity analysis that applied one week of lag to the effect of changes in mobility metrics on changes in R.

**Figure S3. Change over time in the association between visits to retail and recreation places and R by region**

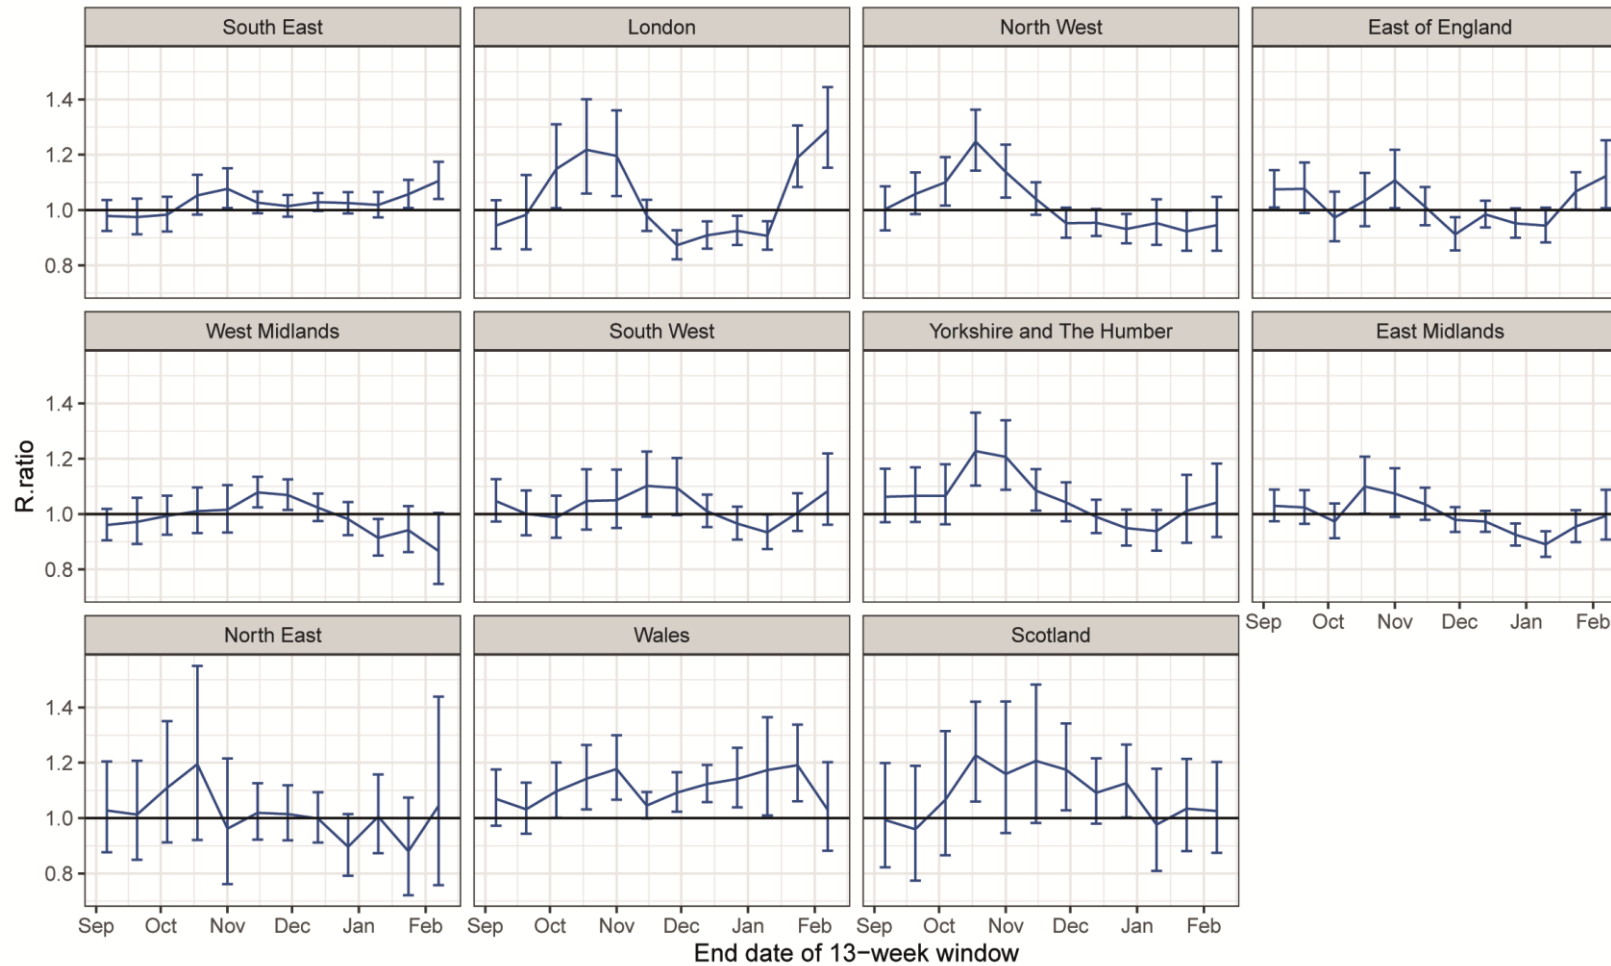

The number by x-axis denotes the number of local authorities included in the analysis. The three weeks of the Christmas and New Year festive period (i.e. between 21<sup>st</sup> Dec 2020 and 10<sup>th</sup> Jan 2021) were excluded from the analysis. Northern Ireland was not included in the analysis due to insufficient data.

**Figure S4. Change over time in the association between visits to workplaces and R by region**

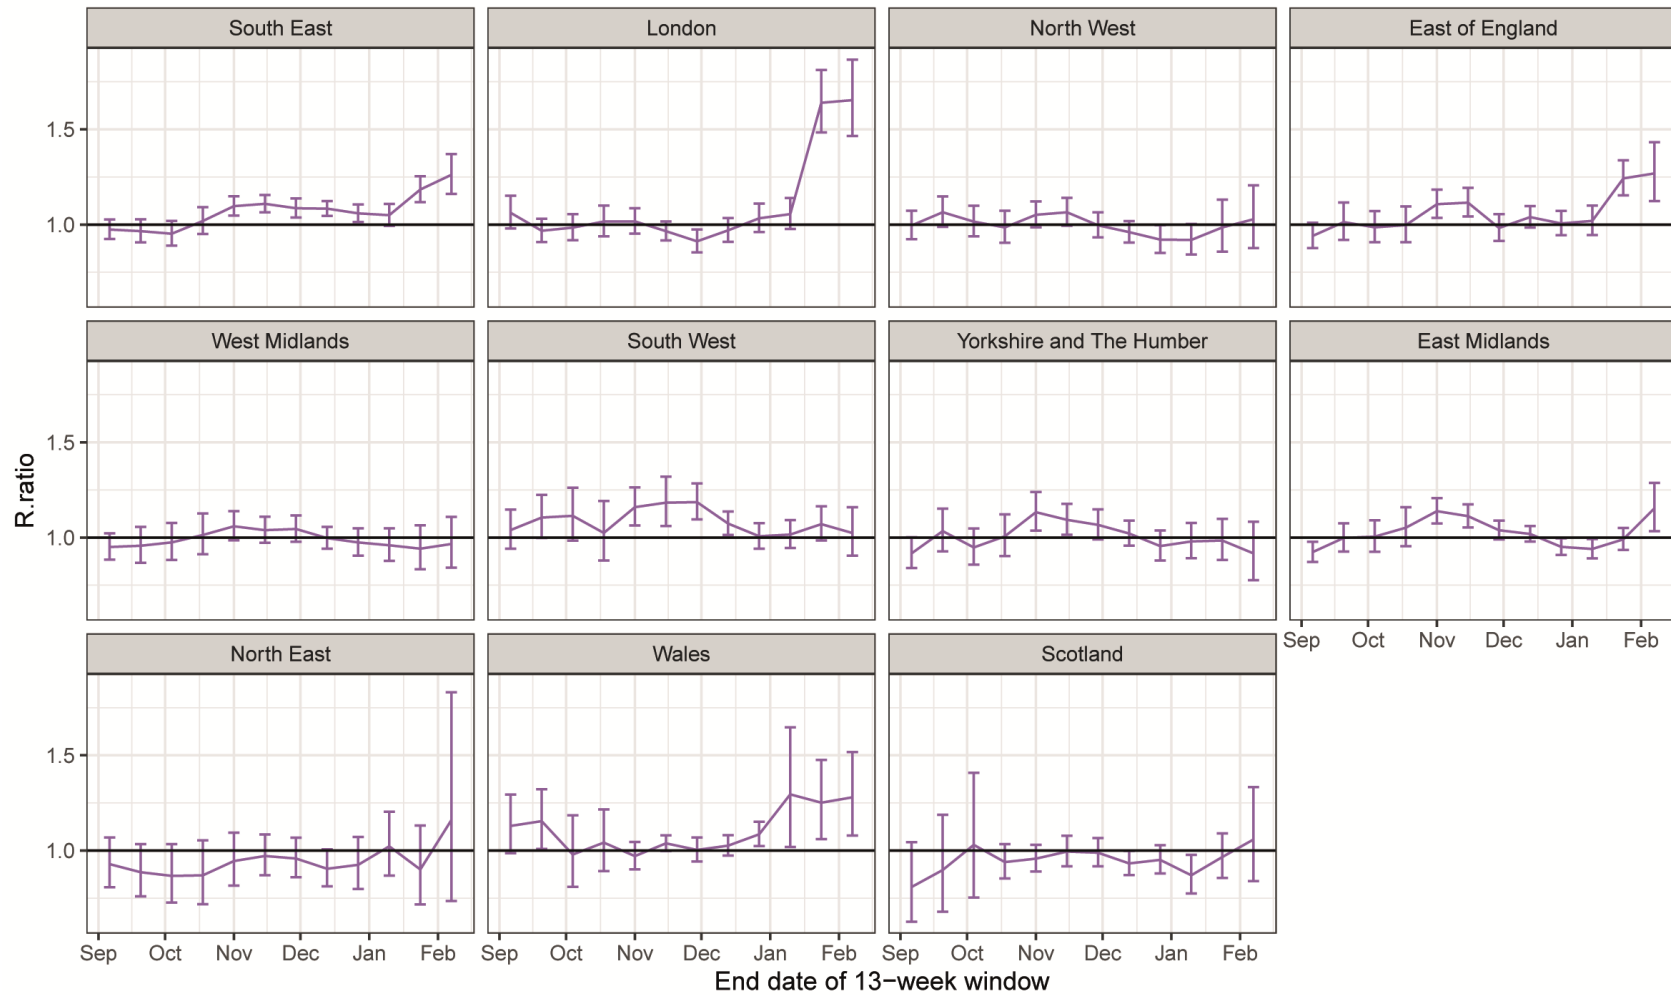

The number by x-axis denotes the number of local authorities included in the analysis. The three weeks of the Christmas and New Year festive period (i.e. between 21<sup>st</sup> Dec 2020 and 10<sup>th</sup> Jan 2021) were excluded from the analysis. Northern Ireland was not included in the analysis due to insufficient data.

**Figure S5. Change over time in the association between time length spent at residential areas and R by region**

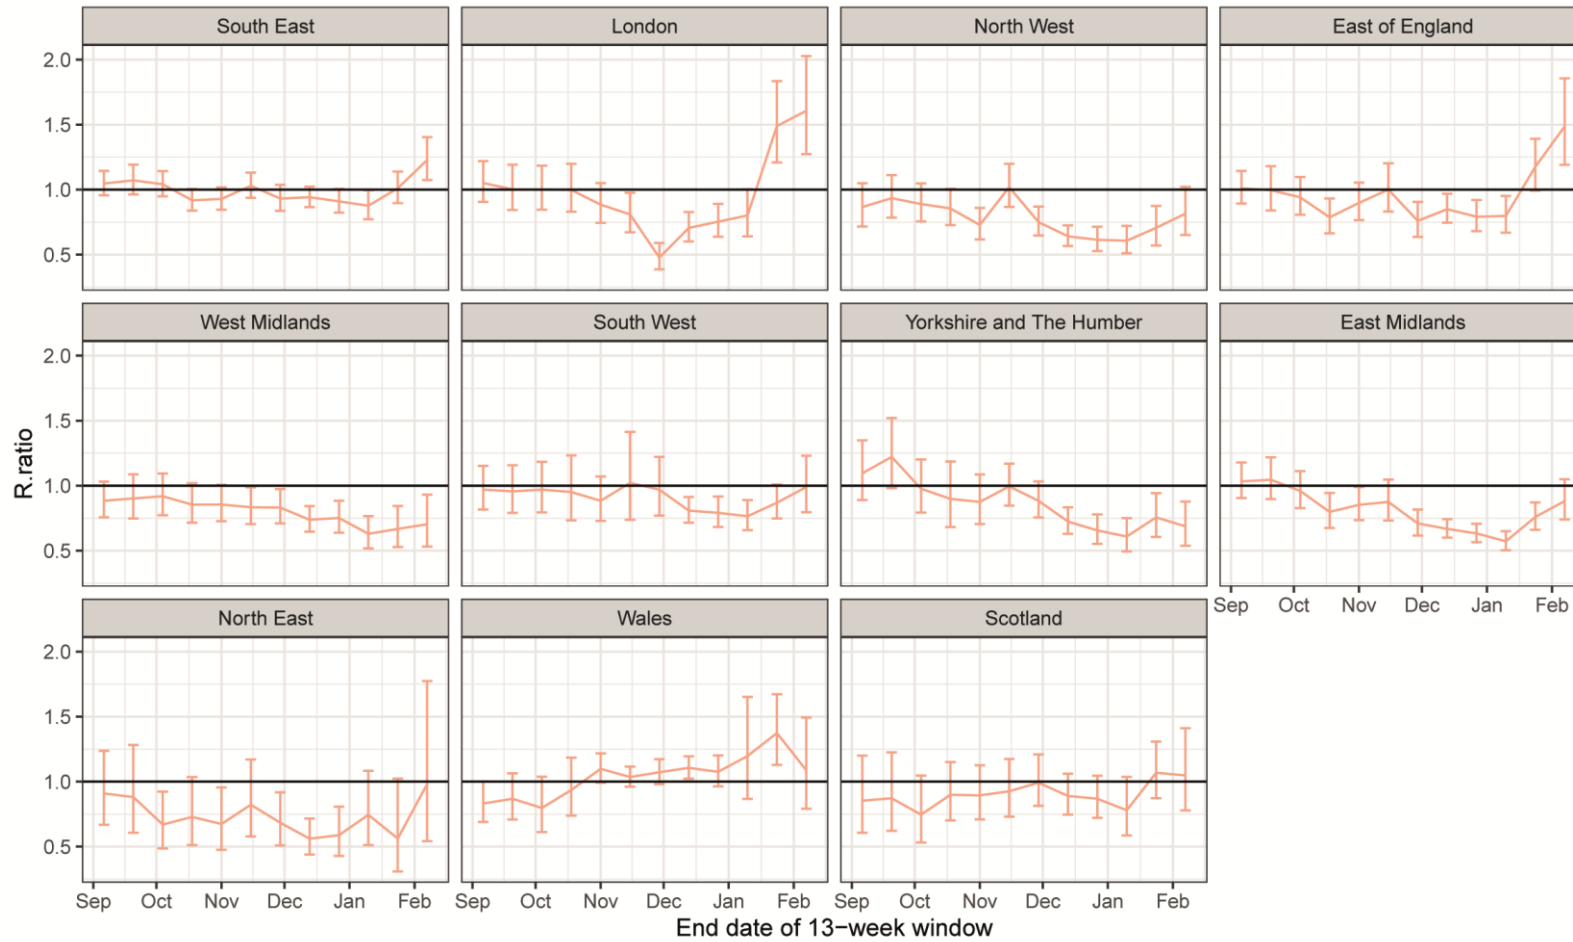

The number by x-axis denotes the number of local authorities included in the analysis. The three weeks of the Christmas and New Year festive period (i.e. between 21<sup>st</sup> Dec 2020 and 10<sup>th</sup> Jan 2021) were excluded from the analysis. Northern Ireland was not included in the analysis due to insufficient data.



## STROBE checklist

STROBE Statement—checklist of items that should be included in reports of observational studies

|                           | Item No | Recommendation                                                                                                                                                                                                                                                                                                                                                                                                                                                                                                                                                                                                                                                                                   | Page No |
|---------------------------|---------|--------------------------------------------------------------------------------------------------------------------------------------------------------------------------------------------------------------------------------------------------------------------------------------------------------------------------------------------------------------------------------------------------------------------------------------------------------------------------------------------------------------------------------------------------------------------------------------------------------------------------------------------------------------------------------------------------|---------|
| <b>Title and abstract</b> | 1       | (a) Indicate the study's design with a commonly used term in the title or the abstract<br>(b) Provide in the abstract an informative and balanced summary of what was done and what was found                                                                                                                                                                                                                                                                                                                                                                                                                                                                                                    | 1       |
| <b>Introduction</b>       |         |                                                                                                                                                                                                                                                                                                                                                                                                                                                                                                                                                                                                                                                                                                  |         |
| Background/rationale      | 2       | Explain the scientific background and rationale for the investigation being reported                                                                                                                                                                                                                                                                                                                                                                                                                                                                                                                                                                                                             | 3       |
| Objectives                | 3       | State specific objectives, including any prespecified hypotheses                                                                                                                                                                                                                                                                                                                                                                                                                                                                                                                                                                                                                                 | 3       |
| <b>Methods</b>            |         |                                                                                                                                                                                                                                                                                                                                                                                                                                                                                                                                                                                                                                                                                                  |         |
| Study design              | 4       | Present key elements of study design early in the paper                                                                                                                                                                                                                                                                                                                                                                                                                                                                                                                                                                                                                                          | 3       |
| Setting                   | 5       | Describe the setting, locations, and relevant dates, including periods of recruitment, exposure, follow-up, and data collection                                                                                                                                                                                                                                                                                                                                                                                                                                                                                                                                                                  | 3-4     |
| Participants              | 6       | (a) <i>Cohort study</i> —Give the eligibility criteria, and the sources and methods of selection of participants. Describe methods of follow-up<br><i>Case-control study</i> —Give the eligibility criteria, and the sources and methods of case ascertainment and control selection. Give the rationale for the choice of cases and controls<br><i>Cross-sectional study</i> —Give the eligibility criteria, and the sources and methods of selection of participants<br>(b) <i>Cohort study</i> —For matched studies, give matching criteria and number of exposed and unexposed<br><i>Case-control study</i> —For matched studies, give matching criteria and the number of controls per case | 4       |
| Variables                 | 7       | Clearly define all outcomes, exposures, predictors, potential confounders, and effect modifiers. Give diagnostic criteria, if applicable                                                                                                                                                                                                                                                                                                                                                                                                                                                                                                                                                         | 4-5     |
| Data sources/measurement  | 8*      | For each variable of interest, give sources of data and details of methods of assessment (measurement). Describe comparability of assessment methods if there is more than one group                                                                                                                                                                                                                                                                                                                                                                                                                                                                                                             | 3-4     |
| Bias                      | 9       | Describe any efforts to address potential sources of bias                                                                                                                                                                                                                                                                                                                                                                                                                                                                                                                                                                                                                                        | 5       |
| Study size                | 10      | Explain how the study size was arrived at                                                                                                                                                                                                                                                                                                                                                                                                                                                                                                                                                                                                                                                        | NA      |
| Quantitative variables    | 11      | Explain how quantitative variables were handled in the analyses. If applicable, describe which groupings were chosen and why                                                                                                                                                                                                                                                                                                                                                                                                                                                                                                                                                                     | 4-5     |
| Statistical methods       | 12      | (a) Describe all statistical methods, including those used to control for confounding<br>(b) Describe any methods used to examine subgroups and interactions<br>(c) Explain how missing data were addressed<br>(d) <i>Cohort study</i> —If applicable, explain how loss to follow-up was addressed<br><i>Case-control study</i> —If applicable, explain how matching of cases and controls was addressed<br><i>Cross-sectional study</i> —If applicable, describe analytical methods taking account of sampling strategy<br>(e) Describe any sensitivity analyses                                                                                                                                | 4-5     |

Continued on next page

| <b>Results</b>           |     |                                                                                                                                                                                                                                                                                                                                                                                                                       |           |
|--------------------------|-----|-----------------------------------------------------------------------------------------------------------------------------------------------------------------------------------------------------------------------------------------------------------------------------------------------------------------------------------------------------------------------------------------------------------------------|-----------|
| Participants             | 13* | (a) Report numbers of individuals at each stage of study—eg numbers potentially eligible, examined for eligibility, confirmed eligible, included in the study, completing follow-up, and analysed<br><br>(b) Give reasons for non-participation at each stage<br><br>(c) Consider use of a flow diagram                                                                                                               | 5         |
| Descriptive data         | 14* | (a) Give characteristics of study participants (eg demographic, clinical, social) and information on exposures and potential confounders<br><br>(b) Indicate number of participants with missing data for each variable of interest<br><br>(c) <i>Cohort study</i> —Summarise follow-up time (eg, average and total amount)                                                                                           | Figure S1 |
| Outcome data             | 15* | <i>Cohort study</i> —Report numbers of outcome events or summary measures over time<br><br><i>Case-control study</i> —Report numbers in each exposure category, or summary measures of exposure<br><br><i>Cross-sectional study</i> —Report numbers of outcome events or summary measures                                                                                                                             | Figure S1 |
| Main results             | 16  | (a) Give unadjusted estimates and, if applicable, confounder-adjusted estimates and their precision (eg, 95% confidence interval). Make clear which confounders were adjusted for and why they were included<br><br>(b) Report category boundaries when continuous variables were categorized<br><br>(c) If relevant, consider translating estimates of relative risk into absolute risk for a meaningful time period | 5-6       |
| Other analyses           | 17  | Report other analyses done—eg analyses of subgroups and interactions, and sensitivity analyses                                                                                                                                                                                                                                                                                                                        | 6         |
| <b>Discussion</b>        |     |                                                                                                                                                                                                                                                                                                                                                                                                                       |           |
| Key results              | 18  | Summarise key results with reference to study objectives                                                                                                                                                                                                                                                                                                                                                              | 6         |
| Limitations              | 19  | Discuss limitations of the study, taking into account sources of potential bias or imprecision. Discuss both direction and magnitude of any potential bias                                                                                                                                                                                                                                                            | 7-8       |
| Interpretation           | 20  | Give a cautious overall interpretation of results considering objectives, limitations, multiplicity of analyses, results from similar studies, and other relevant evidence                                                                                                                                                                                                                                            | 7         |
| Generalisability         | 21  | Discuss the generalisability (external validity) of the study results                                                                                                                                                                                                                                                                                                                                                 | 8         |
| <b>Other information</b> |     |                                                                                                                                                                                                                                                                                                                                                                                                                       |           |
| Funding                  | 22  | Give the source of funding and the role of the funders for the present study and, if applicable, for the original study on which the present article is based                                                                                                                                                                                                                                                         | 5         |

\*Give information separately for cases and controls in case-control studies and, if applicable, for exposed and unexposed groups in cohort and cross-sectional studies.

**Note:** An Explanation and Elaboration article discusses each checklist item and gives methodological background and published examples of transparent reporting. The STROBE checklist is best used in conjunction with this article (freely available on the Web sites of PLoS Medicine at <http://www.plosmedicine.org/>, Annals of Internal Medicine at <http://www.annals.org/>, and Epidemiology at <http://www.epidem.com/>). Information on the STROBE Initiative is available at [www.strobe-statement.org](http://www.strobe-statement.org).

## References

1. Badr HS, Du H, Marshall M, Dong E, Squire MM, Gardner LM. Association between mobility patterns and COVID-19 transmission in the USA: a mathematical modelling study. *Lancet Infect Dis* 2020; **20**(11): 1247-54.
2. Brown KA, Soucy JR, Buchan SA, et al. The mobility gap: estimating mobility thresholds required to control SARS-CoV-2 in Canada. *Cmaj* 2021; **193**(17): E592-e600.
3. Carlitz RD, Makhura MN. Life under lockdown: Illustrating tradeoffs in South Africa's response to COVID-19. *World Dev* 2021; **137**: 105168.
4. Cazelles B, Comiskey C, Nguyen-Van-Yen B, Champagne C, Roche B. Parallel trends in the transmission of SARS-CoV-2 and retail/recreation and public transport mobility during non-lockdown periods. *Int J Infect Dis* 2021; **104**: 693-5.
5. Chen Y, Chen M, Huang B, Wu C, Shi W. Modeling the Spatiotemporal Association Between COVID-19 Transmission and Population Mobility Using Geographically and Temporally Weighted Regression. *Geohealth* 2021; **5**(5): e2021GH000402.
6. da Silva TT, Francisquini R, Nascimento MCV. Meteorological and human mobility data on predicting COVID-19 cases by a novel hybrid decomposition method with anomaly detection analysis: A case study in the capitals of Brazil. *Expert Syst Appl* 2021; **182**: 115190.
7. Díaz-Castro L, Cabello-Rangel H, Hoffman K. The Impact of Health Policies and Sociodemographic Factors on Doubling Time of the COVID-19 Pandemic in Mexico. *Int J Environ Res Public Health* 2021; **18**(5).
8. Fan C, Lee S, Yang Y, Oztekin B, Li Q, Mostafavi A. Effects of population co-location reduction on cross-county transmission risk of COVID-19 in the United States. *Appl Netw Sci* 2021; **6**(1): 14.
9. Gao S, Rao J, Kang Y, et al. Association of Mobile Phone Location Data Indications of Travel and Stay-at-Home Mandates With COVID-19 Infection Rates in the US. *JAMA Netw Open* 2020; **3**(9): e2020485.
10. Gatalo O, Tseng K, Hamilton A, Lin G, Klein E. Associations between phone mobility data and COVID-19 cases. *Lancet Infect Dis* 2020.
11. Glaeser EL, Gorback C, Redding SJ. JUE Insight: How Much does COVID-19 Increase with Mobility? Evidence from New York and Four Other U.S. Cities. *J Urban Econ* 2020: 103292.
12. Iacus SM, Santamaria C, Sermi F, Spyrtatos S, Tarchi D, Vespe M. Human mobility and COVID-19 initial dynamics. *Nonlinear Dyn* 2020: 1-19.
13. Jamshidi S, Baniasad M, Niyogi D. Global to USA County Scale Analysis of Weather, Urban Density, Mobility, Homestay, and Mask Use on COVID-19. *Int J Environ Res Public Health* 2020; **17**(21).
14. Kajitani Y, Hatayama M. Explaining the effective reproduction number of COVID-19 through mobility and enterprise statistics: Evidence from the first wave in Japan. *PLoS One* 2021; **16**(3): e0247186.
15. Kissler SM, Kishore N, Prabhu M, et al. Reductions in commuting mobility correlate with geographic differences in SARS-CoV-2 prevalence in New York City. *Nat Commun* 2020; **11**(1): 4674.
16. Kraemer MUG, Yang CH, Gutierrez B, et al. The effect of human mobility and control measures on the COVID-19 epidemic in China. *Science* 2020; **368**(6490): 493-7.
17. Lamb MR, Kandula S, Shaman J. Differential COVID-19 case positivity in New York City neighborhoods: Socioeconomic factors and mobility. *Influenza Other Respir Viruses* 2020.
18. Leung K, Wu JT, Leung GM. Real-time tracking and prediction of COVID-19 infection using digital proxies of population mobility and mixing. *Nat Commun* 2021; **12**(1): 1501.
19. Li X, Rudolph AE, Mennis J. Association Between Population Mobility Reductions and New COVID-19 Diagnoses in the United States Along the Urban-Rural Gradient, February-April, 2020. *Prev Chronic Dis* 2020; **17**: E118.
20. Monod M, Blenkinsop A, Xi X, et al. Age groups that sustain resurging COVID-19 epidemics in the United States. *Science* 2021; **371**(6536).
21. Nakanishi M, Shibasaki R, Yamasaki S, et al. On-site Dining in Tokyo During the COVID-19 Pandemic: Time Series Analysis Using Mobile Phone Location Data. *JMIR Mhealth Uhealth* 2021; **9**(5): e27342.
22. Sartorius B, Lawson AB, Pullan RL. Modelling and predicting the spatio-temporal spread of COVID-19, associated deaths and impact of key risk factors in England. *Sci Rep* 2021; **11**(1): 5378.
23. Sehra ST, Kishfy LJ, Brodski A, George MD, Wiebe DJ, Baker JF. Association of cell phone location data and trends in COVID-19 infections during loosening of stay-at-home restrictions. *J Travel Med* 2020; **27**(8).
24. Steiger E, Mussnug T, Kroll LE. Causal graph analysis of COVID-19 observational data in German districts reveals effects of determining factors on reported case numbers. *PLoS One* 2021; **16**(5): e0237277.
25. Unwin HJT, Mishra S, Bradley VC, et al. State-level tracking of COVID-19 in the United States. *Nat Commun* 2020; **11**(1): 6189.
26. Wang B, Liu J, Li Y, et al. Airborne particulate matter, population mobility and COVID-19: a multi-city study in China. *BMC Public Health* 2020; **20**(1): 1585.

27. Wang S, Liu Y, Hu T. Examining the Change of Human Mobility Adherent to Social Restriction Policies and Its Effect on COVID-19 Cases in Australia. *Int J Environ Res Public Health* 2020; **17**(21).
28. Xiong C, Hu S, Yang M, Luo W, Zhang L. Mobile device data reveal the dynamics in a positive relationship between human mobility and COVID-19 infections. *Proc Natl Acad Sci U S A* 2020; **117**(44): 27087-9.
29. Yang H, Chen D, Jiang Q, Yuan Z. High intensities of population movement were associated with high incidence of COVID-19 during the pandemic. *Epidemiol Infect* 2020; **148**: e177.
30. Younis J, Freitag H, Ruthberg JS, Romanes JP, Nielsen C, Mehta N. Social Media as an Early Proxy for Social Distancing Indicated by the COVID-19 Reproduction Number: Observational Study. *JMIR Public Health Surveill* 2020; **6**(4): e21340.
31. Zheng Z, Xie Z, Qin Y, Wang K, Yu Y, Fu P. Exploring the influence of human mobility factors and spread prediction on early COVID-19 in the USA. *BMC Public Health* 2021; **21**(1): 615.
32. Zhou Y, Xu R, Hu D, Yue Y, Li Q, Xia J. Effects of human mobility restrictions on the spread of COVID-19 in Shenzhen, China: a modelling study using mobile phone data. *Lancet Digit Health* 2020; **2**(8): e417-e24.
33. Zhu Y, Xie J, Huang F, Cao L. The mediating effect of air quality on the association between human mobility and COVID-19 infection in China. *Environ Res* 2020; **189**: 109911.
34. Google LLC. Google COVID-19 Community Mobility Reports. 2021. <https://www.google.com/covid19/mobility/> (accessed 17-Feb 2021).
35. Aktay A, Bavadekar S, Cossoul G, et al. Google COVID-19 community mobility reports: Anonymization process description (version 1.0). *arXiv preprint arXiv:200404145* 2020.
36. Apple. Mobility Trends Reports. 2021. <https://covid19.apple.com/mobility> (accessed 15 Feb 2021).
37. Gandy A, Mishra S. ImperialCollegeLondon/covid19local. 2021. <https://zenodo.org/record/4506699> (accessed 17-Feb 2021).
38. Mishra S, Scott J, Zhu H, et al. A COVID-19 Model for Local Authorities of the United Kingdom. *medRxiv* 2020: 2020.11.24.20236661.
39. Northern Ireland Statistics and Research Agency. 2019 Mid Year Population Estimates for Northern Ireland. 2020. <https://www.nisra.gov.uk/publications/2019-mid-year-population-estimates-northern-ireland> (accessed 27-Jan 2021).
40. Office for National Statistics. Population estimates for the UK, England and Wales, Scotland and Northern Ireland, provisional: mid-2019. 2020. <https://www.ons.gov.uk/peoplepopulationandcommunity/populationandmigration/populationestimates/bulletins/annualmidyearpopulationestimates/mid2019#population-age-structure-and-density-for-local-authority-areas> (accessed 27-Jan 2021).
41. Legatum Institute. The UK Prosperity Index. 2016. <https://uk.prosperity.com/docs/2016/2016UKProsperityDataset.xls> (accessed 18-Nov 2020).
42. Institute L. A guide to UK prosperity index. 2016. <https://uk.prosperity.com/docs/2016/2016UKProsperityIndexMethodology.pdf> (accessed 18-Nov 2020).
43. Statistics OfN. 2011 Census Data On Nomis. 2011. <https://www.nomisweb.co.uk/census/2011> (accessed 18-Nov 2020).
